# Supplementary material
Source: publisher figshare collection journal article supplement (https://tandf.figshare.com/articles/dataset/_/19703656)
Supplement: Supplementary file 1 [file 1]

## Sheet: DYT-KMT2B(n=10)
n=1,812					normalised value (β-value(sample)-β-value(control_median)/σ) if >3 "GOM", if <3, "LOM"
ID	CpG site	location	mean.meth.diff	adjusted_pvalue	KMT2B_1	KMT2B_2	KMT2B_3	KMT2B_4	KMT2B_5	KMT2B_6	KMT2B_7	KMT2B_8	KMT2B_9	KMT2B_10
276089	Shelf	chr1:6265016-6265017	-0.205523	0.0416267	1.24785	1.49263	3.67526	2.19025	2.13753	1.34097	2.64004	-0.0480939	3.70532	1.67621
380543	Open Sea	chr1:9242088-9242089	-0.213823	0.0160088	2.68837	2.90851	3.96803	3.84505	2.31253	2.89196	1.64138	2.16805	2.85724	0.893528
536511	Open Sea	chr1:14026248-14026249	-0.236383	0.0370732	3.346	2.72271	5.70207	1.9227	3.24036	2.27525	0.873955	2.82981	4.20664	4.45416
536513	Open Sea	chr1:14026298-14026299	-0.269386	0.0103055	3.41083	3.98001	7.67695	3.50525	2.50188	3.12973	3.47662	4.16379	5.89493	4.98458
628053	Shore	chr1:17018607-17018608	-0.261184	0.00819277	2.1118	1.53332	4.4993	2.71598	2.10476	3.61801	4.88724	2.49013	3.61801	2.95393
628055	Shore	chr1:17018650-17018651	-0.265266	0.0164165	2.62657	2.17618	1.65148	2.77995	1.65148	2.424	2.91774	2.07614	2.06421	1.11289
634257	Open Sea	chr1:17223157-17223158	-0.217998	0.0468458	1.64156	2.88117	2.94956	4.08427	3.94428	1.84431	3.19271	2.834	2.50849	3.31429
908013	Open Sea	chr1:26233644-26233645	-0.222833	0.0358395	0.674465	2.47304	2.09834	5.21823	3.1475	3.93438	4.34356	1.8069	1.57375	2.36063
908015	Open Sea	chr1:26233709-26233710	-0.279813	0.00438874	2.74763	4.25024	4.30879	4.27997	3.95254	3.48191	3.49427	2.68283	2.31831	2.37776
908017	Open Sea	chr1:26233737-26233738	-0.307143	0.00312981	2.5843	2.62019	4.02378	3.99788	4.32456	2.76187	4.21803	3.66326	3.09139	3.44273
1017329	Open Sea	chr1:29508990-29508991	-0.288073	0.000224982	3.11096	3.54692	3.99845	3.76718	2.60775	3.48464	1.74082	3.20716	4.30432	3.28891
1176303	Shelf	chr1:36038701-36038702	-0.299444	0.0222196	2.87803	3.19134	0.504031	0.0216137	3.28583	3.10585	1.99446	1.41673	2.74112	3.42757
1176305	Shelf	chr1:36038708-36038709	-0.321446	0.00984643	3.35806	2.53344	1.49192	1.19763	3.61921	3.91128	2.90104	1.45145	2.13935	1.74093
1268347	Open Sea	chr1:39546545-39546546	-0.218016	0.037903	1.94297	2.01129	0.809088	1.30374	1.73254	1.86503	1.25737	2.3091	2.01129	2.24358
1358039	Open Sea	chr1:43250691-43250692	-0.407478	0.00983349	3.74267	4.93138	6.96552	3.20025	4.26795	4.09354	5.0622	2.7392	3.74267	5.19815
1372647	Open Sea	chr1:43815323-43815324	-0.329849	0.0269609	1.99354	2.4101	2.06928	1.90908	2.77655	1.53489	2.69849	1.61021	2.33359	2.14232
1400133	Open Sea	chr1:44821328-44821329	-0.201415	0.0467411	0.460941	2.11827	2.39689	1.91776	1.36113	2.56524	0.804601	1.81225	1.72877	1.80122
1703791	Open Sea	chr1:60392651-60392652	-0.207063	0.0175885	4.80259	2.53146	9.27406	6.99047	3.24546	2.44046	4.02009	4.85196	5.21836	4.13796
1703797	Open Sea	chr1:60392725-60392726	-0.258201	0.0362652	2.70357	1.39218	2.98325	4.36639	1.62536	1.5031	3.49466	3.65239	2.41372	1.83768
1703799	Open Sea	chr1:60392785-60392786	-0.214281	0.0053005	1.34953	1.5346	5.15812	4.69176	2.11222	1.41854	2.8069	3.14139	4.21313	3.87564
1752727	Open Sea	chr1:63249209-63249210	-0.368386	0.0400497	2.74314	3.34992	3.34992	3.40326	3.34992	1.14883	4.05522	4.69415	3.99003	1.85632
1822603	Open Sea	chr1:67600311-67600312	-0.248154	0.00280083	4.033	1.43551	3.41882	3.25652	2.43213	4.03759	4.00601	5.26498	2.48732	0.781444
1822659	Open Sea	chr1:67600772-67600773	-0.284293	0.00170686	3.5178	3.09805	2.39288	4.25917	2.55016	2.97979	3.99315	3.75694	3.30406	2.8567
1822661	Open Sea	chr1:67600822-67600823	-0.272382	0.00284603	2.52414	1.84998	2.56734	4.25298	2.40034	2.6548	4.08648	3.21135	2.2225	1.73755
1961269	Open Sea	chr1:78511344-78511345	-0.242559	0.03173	2.6178	1.71393	3.42591	1.56415	2.92528	4.12709	3.42963	2.63824	4.20718	3.41362
1961273	Open Sea	chr1:78511360-78511361	-0.213891	0.0130441	2.6267	1.55887	1.74968	3.63396	5.64129	5.29487	4.93501	2.86613	2.00765	2.81225
1961281	Open Sea	chr1:78511451-78511452	-0.226504	0.0164535	4.99778	1.48615	4.51045	3.00538	7.30437	5.59857	7.44836	4.46343	3.47436	2.90053
2030207	Open Sea	chr1:84326856-84326857	-0.292976	0.0094507	6.15778	3.76218	4.16712	6.48955	4.96097	3.68499	4.07604	5.01786	2.93847	2.80938
2030209	Open Sea	chr1:84326939-84326940	-0.22046	0.0160088	4.80345	2.7517	3.6956	6.75721	2.7517	2.82942	4.22239	4.83881	0.0216592	3.91342
2054643	Open Sea	chr1:85931226-85931227	-0.221059	0.0383798	4.43517	2.89718	2.97181	3.23143	4.48122	2.82152	0.146498	4.46519	4.1172	5.14283
2054645	Open Sea	chr1:85931301-85931302	-0.218197	0.0240637	2.17037	5.0004	4.47855	4.94449	3.22411	4.2986	3.9567	2.93929	1.31018	1.86931
2208567	Open Sea	chr1:95393287-95393288	-0.223437	0.00334942	1.37753	2.49316	3.03945	3.25898	2.77597	2.2814	2.39202	2.88038	3.72836	2.49316
2208569	Open Sea	chr1:95393305-95393306	-0.235327	0.00334437	0.521089	2.70696	2.87438	2.42122	1.81962	1.99047	2.83301	1.81962	3.75785	3.92133
2208571	Open Sea	chr1:95393310-95393311	-0.218293	0.00445311	1.77558	2.75156	2.47296	2.20236	2.11934	2.29972	2.11715	1.30357	3.09446	3.40847
2231813	Open Sea	chr1:97186718-97186719	-0.22044	0.0126818	3.31825	2.20371	2.44259	4.0007	3.51188	2.01952	2.38022	1.67435	3.15901	1.61184
2342529	Island1372	chr1:106623405-106623406	-0.370521	0.00866233	2.29513	1.80827	3.53188	0.680091	3.95382	4.04112	4.04112	2.34363	5.78711	5.9508
2342531	Island1372	chr1:106623420-106623421	-0.375422	0.0026249	2.08589	2.8733	4.22667	3.60433	4.74997	5.95622	2.95689	4.45094	4.94026	6.80696
2342533	Island1372	chr1:106623429-106623430	-0.29866	0.0108191	2.05534	2.51384	2.28459	1.81692	2.98666	3.79763	1.80698	2.92457	3.8694	4.58854
2342535	Island1372	chr1:106623434-106623435	-0.326596	0.0103055	2.23329	3.44721	3.74738	3.84347	1.82565	6.27013	2.80506	4.39277	5.79306	7.31373
2342537	Island1372	chr1:106623436-106623437	-0.308514	0.00543842	3.29911	2.83808	3.60946	2.6202	3.6424	5.00606	3.96757	3.17302	4.55508	6.03834
2342539	Island1372	chr1:106623442-106623443	-0.32319	0.00543842	2.43616	4.2836	4.20891	3.57811	2.84642	7.69247	1.96814	4.71775	5.65841	5.85812
2342543	Island1372	chr1:106623481-106623482	-0.310586	0.00976721	2.44262	2.41928	2.12971	2.62936	3.00562	4.6461	2.87381	2.96871	3.69182	3.60972
2342545	Island1372	chr1:106623496-106623497	-0.18999	0.345641	1.78037	2.03934	2.82085	0.470843	2.7163	5.04739	1.17556	3.19167	2.75149	1.23596
2342547	Island1372	chr1:106623546-106623547	-0.230667	0.326347	1.89687	4.56323	4.70867	1.8664	3.034	5.27426	1.7004	5.36314	2.1955	3.76332
2342549	Island1372	chr1:106623559-106623560	-0.211871	0.0241373	4.22369	3.28292	1.90386	4.00553	2.1337	8.56022	3.49041	4.33058	6.16901	4.9912
2342551	Island1372	chr1:106623567-106623568	-0.24472	0.337553	2.30612	2.20501	4.07819	2.90951	1.83849	6.60552	6.04715	4.26571	2.64621	4.86577
2342553	Island1372	chr1:106623593-106623594	-0.158663	0.437965	4.66052	4.19305	2.91856	1.72932	5.61115	11.488	0.297283	8.04714	-0.348539	2.3962
2342555	Island1372	chr1:106623624-106623625	-0.213998	0.403904	2.57135	3.31765	3.76623	2.18266	4.62588	8.0547	0.902261	5.27061	2.23449	-0.121734
2342557	Island1372	chr1:106623639-106623640	-0.198634	0.0887823	3.077	3.06771	2.95311	0.31735	6.57013	8.52877	2.38012	3.63252	-0.198343	0.936181
2342559	Island1372	chr1:106623645-106623646	-0.197551	0.0379521	5.04431	2.75868	5.04431	2.42622	4.36555	10.5266	1.84442	2.60524	0.680827	0.457059
2342561	Island1372	chr1:106623659-106623660	-0.212508	0.051992	3.74227	3.0816	2.92581	3.81933	4.30906	6.28546	1.68811	4.57051	1.55872	-0.188121
2342563	Island1372	chr1:106623666-106623667	-0.21901	0.0862114	4.86392	3.00097	3.08392	-0.0261253	5.98083	6.45034	2.68046	4.58879	0.676883	1.38665
2342565	Island1372	chr1:106623677-106623678	-0.254409	0.00310405	3.70849	4.61744	2.79955	3.70849	6.43532	5.83675	5.80605	4.52654	3.70849	2.18147
2342567	Island1372	chr1:106623681-106623682	-0.234764	0.0186723	5.57524	6.72658	5.60947	2.27411	3.77169	9.16466	6.99726	3.81752	2.95634	-1.05519
2342569	Island1372	chr1:106623694-106623695	-0.293379	0.0300786	5.85369	3.46565	3.15748	3.23057	7.21974	6.43499	1.78924	5.57304	7.34047	-0.388965
2342571	Island1372	chr1:106623696-106623697	-0.234439	0.478398	2.22005	4.78619	2.27999	1.26099	4.9458	3.55338	3.05923	4.30072	4.6177	0.0100385
2342573	Island1372	chr1:106623699-106623700	-0.278507	0.0298286	4.36139	2.81105	2.98994	5.09528	4.59991	5.75578	3.75992	4.70548	1.37997	2.25814
2342575	Island1372	chr1:106623705-106623706	-0.199008	0.0809519	2.16433	5.3643	1.31478	0.087652	4.99617	4.58712	4.32682	3.57111	2.16433	0.43826
2342577	Island1372	chr1:106623712-106623713	-0.320093	0.00741417	3.66859	4.61387	3.18845	4.55249	3.22793	7.04095	2.47084	4.96864	4.45806	2.87257
2342581	Island1372	chr1:106623739-106623740	-0.188962	0.27894	1.77949	5.42516	2.27592	2.27592	4.84673	7.40196	3.92552	3.1757	3.41249	0.390662
2342583	Island1372	chr1:106623746-106623747	-0.173557	0.6094	3.52766	3.63456	2.60375	4.1156	3.49307	7.33915	1.43719	3.50928	3.46577	-0.335967
2342585	Island1372	chr1:106623770-106623771	-0.260686	0.0234657	2.89559	9.23187	6.5806	8.756	4.14535	6.83013	5.22315	6.34493	4.03537	-0.182072
2342587	Island1372	chr1:106623779-106623780	-0.255317	0.289681	1.85002	7.90067	3.37357	5.50653	3.29925	5.14417	6.53785	6.35628	3.59122	1.85002
2342589	Island1372	chr1:106623781-106623782	-0.219634	0.356004	1.1266	6.78901	4.5554	2.90958	4.45504	11.8393	4.47627	8.72873	5.92692	-0.538811
2342595	Island1372	chr1:106623838-106623839	-0.164549	0.673781	2.23263	3.69236	3.69236	1.62016	1.12678	3.69236	-0.156015	2.27645	-0.476714	0.140014
2342597	Island1372	chr1:106623840-106623841	-0.231015	0.473761	1.74958	4.29321	5.01804	2.55191	3.3707	3.56353	0	2.25757	1.30097	-1.13835
2591401	Open Sea	chr1:120905139-120905140	-0.246669	0.0494744	2.84776	1.00253	6.22403	2.6943	2.46075	5.80601	3.42196	3.46626	3.40541	1.00253
2591407	Open Sea	chr1:120905193-120905194	-0.260352	0.0213628	1.96235	1.10588	2.67716	2.64841	2.5709	3.42522	2.61823	2.13268	1.79331	1.94062
2591415	Open Sea	chr1:120905265-120905266	-0.302005	0.0240734	3.23837	1.90505	3.57812	2.95414	2.81184	4.53795	2.26989	1.74686	2.95414	0.729115
2591417	Open Sea	chr1:120905281-120905282	-0.305097	0.0302121	2.78945	1.49282	3.77205	1.49282	2.53179	4.16118	2.95842	1.73117	2.50581	2.30321
2591421	Open Sea	chr1:120905310-120905311	-0.310968	0.014148	1.71365	0.665443	2.63185	1.40202	2.77386	3.12414	2.53128	1.3784	2.05625	2.19779
2591423	Open Sea	chr1:120905322-120905323	-0.313923	0.0241373	1.54833	0.848332	2.50201	1.65725	2.26663	2.55795	2.31245	1.28328	1.45225	1.33471
2591425	Open Sea	chr1:120905344-120905345	-0.275382	0.00870947	1.85477	1.45757	2.02801	1.62217	1.66869	2.2806	1.8005	1.63572	1.12287	1.65669
2591427	Open Sea	chr1:120905435-120905436	-0.289701	0.0243002	1.39413	0.928242	2.27672	0.823041	2.42209	2.37212	1.10859	0.765932	1.41093	2.44708
2593341	Open Sea	chr1:121139401-121139402	-0.20287	0.03573	1.64265	1.26865	3.02845	1.47568	0.776237	0.759019	1.72555	1.94622	1.96603	3.54604
2626749	Open Sea	chr1:144567764-144567765	-0.316522	0.020709	1.79043	3.94557	3.30075	3.35937	3.05197	2.29457	2.30766	4.29646	4.35591	1.50307
2626751	Open Sea	chr1:144567773-144567774	-0.332145	0.0467858	2.81223	2.7888	5.24237	2.88254	2.4607	2.53882	3.07588	3.04659	4.21835	1.40612
2626753	Open Sea	chr1:144567776-144567777	-0.297339	0.00360171	3.7687	3.85227	3.87275	2.60163	2.92408	3.05034	2.80719	3.36215	3.46957	1.56885
2626755	Open Sea	chr1:144567792-144567793	-0.349697	0.00359804	2.3861	3.01325	3.26255	3.62028	3.15952	2.99361	3.48227	3.81083	4.06388	0.658234
2626757	Open Sea	chr1:144567802-144567803	-0.314591	0.0418408	3.3854	2.73485	3.90395	3.54673	3.26095	2.23214	2.89926	3.77535	4.60287	0.542795
2626759	Open Sea	chr1:144567809-144567810	-0.332759	0.0094303	3.82058	3.11532	4.7361	4.37471	3.66226	2.56455	3.57033	5.64771	4.7361	1.60406
2648935	Island1545	chr1:145713967-145713968	-0.452217	0.000134519	4.33399	5.29971	5.25814	3.51955	6.33442	5.06704	4.13882	5.3586	4.87069	2.96784
2648937	Island1545	chr1:145713975-145713976	-0.289381	0.357869	1.74958	5.945	13.2006	4.43465	9.58103	5.10591	8.80946	7.91798	7.83294	5.945
2648947	Island1545	chr1:145714053-145714054	-0.0546468	0.141346	0	5.71826	5.55942	0	17.4034	5.08828	11.7729	6.6713	6.6713	0
2648949	Island1545	chr1:145714055-145714056	-0.0695863	0.529008	0	4.96467	10.1906	0	0	5.37839	14.3424	2.74641	12.9081	0
2648951	Island1545	chr1:145714075-145714076	-0.061069	0.132756	0	3.1634	4.56936	2.16443	1.9583	4.48628	7.7108	1.74997	2.57027	3.42702
2648955	Island1545	chr1:145714124-145714125	-0.332808	0.270843	4.18094	2.56251	3.53772	2.21344	3.80086	2.86928	1.72157	1.65293	2.7873	1.67238
2648957	Island1545	chr1:145714143-145714144	-0.381075	0.00518694	3.38715	2.95319	2.67111	2.87797	3.60195	3.37442	2.547	2.05055	3.04345	2.05055
2648959	Island1545	chr1:145714159-145714160	-0.390213	0.214928	1.44362	2.67083	3.8638	3.19563	4.41578	3.18638	3.44983	2.87025	2.87025	1.19594
2681385	Open Sea	chr1:147532531-147532532	-0.205747	0.0182127	8.58813	6.09125	2.1766	7.34602	5.15961	6.20197	5.363	5.21572	1.09187	4.29521
2687985	Open Sea	chr1:147800991-147800992	-0.411406	0.0024383	3.36345	2.20901	2.30392	3.53415	2.89707	2.53493	3.12866	3.44737	3.05956	3.47319
2687987	Open Sea	chr1:147801025-147801026	-0.461852	0.0408455	3.61631	2.6407	2.75892	3.77851	3.53658	3.54828	3.0527	3.65856	2.86738	3.28629
2687997	Open Sea	chr1:147801095-147801096	-0.402537	3.20003e-05	3.60521	3.19341	2.78908	3.76828	3.38225	3.64712	3.70355	3.41212	3.46366	3.76323
2687999	Open Sea	chr1:147801103-147801104	-0.398064	0.000584082	3.13079	2.59987	2.85677	3.54183	3.63863	3.45375	3.30469	3.66594	3.13079	3.13079
2688001	Open Sea	chr1:147801120-147801121	-0.284682	0.00201028	3.0993	2.97527	1.78342	2.60883	2.97668	2.99351	3.0993	3.0993	3.0993	3.0993
2688003	Open Sea	chr1:147801134-147801135	-0.395422	0.000209231	2.76949	2.81352	2.89783	2.68067	3.11243	3.20142	3.36336	3.44509	3.34138	2.57322
2688005	Open Sea	chr1:147801136-147801137	-0.430579	0.000137249	4.36565	2.90992	4.34153	3.65412	3.23966	4.05766	4.40073	4.04784	3.63488	3.43821
2688007	Open Sea	chr1:147801146-147801147	-0.483496	9.67148e-05	5.04885	3.55954	4.31309	4.09292	3.8204	4.79241	5.09503	5.10873	4.90042	3.89291
2688011	Open Sea	chr1:147801155-147801156	-0.434103	0.0378629	3.64212	3.78576	3.55541	3.68469	4.04769	4.16727	4.26649	3.97476	3.37764	3.46652
2688015	Open Sea	chr1:147801178-147801179	-0.497518	0.00569543	2.88936	2.76764	3.41558	3.17981	3.74135	4.64866	5.26276	4.70544	4.48684	4.12327
2688017	Open Sea	chr1:147801186-147801187	-0.502596	0.000475658	3.82249	2.92326	4.15303	3.68156	4.01186	4.60673	4.47511	4.27266	3.88628	2.99832
2688019	Open Sea	chr1:147801218-147801219	-0.537585	0.0131776	4.36353	3.47416	3.93528	4.89726	3.75275	5.30962	3.582	5.11619	4.35771	4.06413
2688021	Open Sea	chr1:147801236-147801237	-0.405067	0.0108832	3.47924	3.47924	3.22499	3.26131	3.09786	3.01225	3.23319	3.47924	2.8925	3.47924
2688023	Open Sea	chr1:147801259-147801260	-0.475913	0.0213889	3.4946	4.67702	4.23321	4.64386	4.91428	5.3511	5.07607	6.08023	4.17974	3.84822
2688025	Open Sea	chr1:147801285-147801286	-0.393115	0.0485277	2.42138	2.85973	2.78003	2.47794	2.49874	3.60796	3.72132	3.06806	2.17362	2.62766
2688027	Open Sea	chr1:147801300-147801301	-0.545881	0.0241393	3.03974	3.51019	3.98888	4.26413	4.09898	3.69915	4.26413	4.28248	3.35146	3.76868
2688551	Island1595	chr1:147826168-147826169	-0.340432	0.0404591	2.66462	2.6109	2.78496	3.0944	2.17345	2.88532	2.49932	2.95114	2.68724	2.6109
2688553	Island1595	chr1:147826177-147826178	-0.354808	0.00908316	4.60981	2.7898	3.98384	2.92506	2.38952	2.70134	2.77947	4.59631	1.17792	2.71541
2688555	Island1595	chr1:147826191-147826192	-0.367562	0.000141542	4.30816	4.62324	3.43562	3.55491	3.81735	4.27357	4.22223	4.02015	3.01918	3.86507
2688557	Island1595	chr1:147826199-147826200	-0.363301	0.00322494	3.1818	3.63634	4.37061	2.12609	3.24674	4.91541	3.96102	4.84187	2.92206	1.76767
2688559	Island1595	chr1:147826206-147826207	-0.385621	0.000165348	4.80003	2.99529	4.33903	3.65619	3.13008	4.64168	2.89944	4.33903	3.64228	4.4433
2688561	Island1595	chr1:147826215-147826216	-0.41216	0.000945679	3.86887	2.7499	2.81227	1.91416	3.31856	3.47754	3.50001	3.28854	2.60815	2.94835
2688563	Island1595	chr1:147826227-147826228	-0.355113	0.000161739	2.855	1.97574	2.04488	2.86829	2.1732	2.71537	2.80713	2.53586	1.89758	2.84049
2688565	Island1595	chr1:147826254-147826255	-0.400079	6.68729e-05	3.35216	4.17308	3.10162	3.70292	3.2673	3.10602	2.60054	4.26509	3.75688	3.79061
2688567	Island1595	chr1:147826267-147826268	-0.417594	0.000525741	4.9133	2.97241	3.89937	3.99766	3.52458	3.66032	4.27985	5.17708	5.05372	3.36274
2688569	Island1595	chr1:147826300-147826301	-0.327085	0.0491622	2.38285	2.59818	3.05141	2.4165	2.4391	2.7193	2.64663	2.84859	3.32491	1.96835
2688571	Island1595	chr1:147826321-147826322	-0.401598	0.000134519	3.62434	2.38696	4.25106	3.84673	4.15949	3.5299	3.06965	4.81295	3.75952	3.29606
2688573	Island1595	chr1:147826337-147826338	-0.398632	0.000229364	3.08765	2.20974	2.96122	3.99505	3.82888	3.38265	2.44997	4.18766	4.1978	2.81372
2688575	Island1595	chr1:147826347-147826348	-0.386414	1.69498e-05	3.66399	3.03537	3.46232	3.35702	3.25953	3.33044	2.93046	3.69752	3.79828	3.39096
2688577	Island1595	chr1:147826353-147826354	-0.393981	3.20003e-05	4.16967	3.00902	3.30597	3.72634	3.9549	3.02294	3.12942	4.31089	3.72634	2.77781
2688579	Island1595	chr1:147826381-147826382	-0.439926	0.0482359	4.19806	3.4153	3.69303	3.8982	3.55922	3.79892	3.67493	5.11639	5.74471	4.46132
2688581	Island1595	chr1:147826387-147826388	-0.383488	1.69498e-05	2.5567	3.10797	2.7724	3.08474	3.40499	3.00051	3.00906	3.50755	3.36149	3.2807
2688585	Open Sea	chr1:147826505-147826506	-0.459661	4.99108e-05	3.26931	3.80819	4.12512	2.08574	3.57279	3.56785	4.19796	3.67901	3.73524	3.24448
2688641	Open Sea	chr1:147826902-147826903	-0.357755	0.0062581	2.66855	2.92177	2.56003	2.35906	2.56003	2.27525	2.56003	2.46137	2.92177	2.92177
2688643	Open Sea	chr1:147826940-147826941	-0.318155	0.0321898	3.32634	3.32634	2.2037	2.08756	2.93585	2.9937	3.10729	2.7276	1.5992	3.32634
2688645	Open Sea	chr1:147826947-147826948	-0.44046	0.000119437	4.33154	4.05704	2.30023	2.95903	3.8574	3.88367	4.38933	3.99034	2.70565	3.69104
2688647	Open Sea	chr1:147826960-147826961	-0.411724	0.000603953	4.22156	3.38495	2.16864	3.17022	3.8172	4.24284	4.12825	4.2099	4.49114	2.4376
2688649	Open Sea	chr1:147827000-147827001	-0.406604	0.0087684	3.50881	2.59844	2.65797	3.57634	4.01786	3.13281	5.06868	3.79242	4.38416	2.12225
2688651	Open Sea	chr1:147827006-147827007	-0.203502	0.000345212	1.83316	1.83316	1.46496	1.83316	1.83316	1.83316	1.83316	1.71043	1.83316	1.83316
2696879	Open Sea	chr1:148526939-148526940	-0.315906	0.0400796	3.24065	1.11783	3.76467	2.08032	2.77965	2.97864	5.07472	3.6886	3.29305	1.89446
2696883	Open Sea	chr1:148527001-148527002	-0.293213	0.0197164	3.23407	3.44647	3.0783	2.8685	4.01288	3.63755	5.0513	4.24027	4.01288	3.56784
2710929	Open Sea	chr1:149233226-149233227	-0.331324	0.00823983	2.71862	2.5988	2.58728	3.11262	2.36609	3.01519	3.03988	1.81203	1.238	2.23337
2710931	Open Sea	chr1:149233244-149233245	-0.25567	0.0147248	2.50025	1.89493	1.91943	3.37079	2.26829	2.60553	3.30366	1.79843	1.7107	2.79502
2710945	Open Sea	chr1:149233291-149233292	-0.235305	0.0146731	2.03601	2.31243	2.05706	3.0644	2.36323	2.70997	3.09529	2.70132	-0.649238	2.80254
2710951	Open Sea	chr1:149233371-149233372	-0.303081	0.000920289	2.8117	3.87333	3.8108	4.14133	2.05037	4.32938	2.95573	3.43762	1.83735	2.92091
2710955	Open Sea	chr1:149233452-149233453	-0.23107	0.0194567	0.944452	2.81693	2.98905	2.29413	3.10996	3.61499	2.47208	2.19616	2.34195	2.43077
2710961	Open Sea	chr1:149233499-149233500	-0.235841	0.0443161	2.2855	2.11615	2.70591	3.44688	1.54694	0.823985	3.21957	1.7764	2.22797	1.9329
2712439	Open Sea	chr1:149293926-149293927	-0.357933	0.00472731	3.52156	3.52717	2.70147	1.46651	3.18055	2.73174	2.1869	3.20447	2.55675	1.67234
2712443	Open Sea	chr1:149293964-149293965	-0.407968	0.000902238	5.21863	5.46191	6.12331	3.05913	3.5851	3.58175	3.27419	3.85288	4.33169	4.58003
2712445	Open Sea	chr1:149293970-149293971	-0.368368	0.00339574	3.69999	4.8477	4.38624	1.82119	3.13222	2.58492	2.49489	3.51524	3.48375	3.21786
2712447	Open Sea	chr1:149294017-149294018	-0.38645	0.000184193	5.17556	5.89587	6.3494	2.89864	3.62823	4.09796	5.07952	4.99182	5.2234	4.48193
2712449	Open Sea	chr1:149294037-149294038	-0.388093	0.000134519	4.65936	5.32033	5.30844	2.25085	4.11422	2.67209	3.08531	3.90394	5.19188	5.03104
2712451	Open Sea	chr1:149294055-149294056	-0.382684	0.000920289	5.36751	5.97583	5.53464	1.69428	3.0373	2.80943	3.03158	4.02614	4.46	5.02467
2712453	Open Sea	chr1:149294057-149294058	-0.361567	0.00132959	4.13705	4.37039	5.43782	1.54601	4.17134	2.99014	4.38447	4.33636	5.29384	2.63115
2712455	Open Sea	chr1:149294066-149294067	-0.380961	0.00201028	4.02993	6.75092	6.42369	1.65205	3.41228	2.36274	4.31195	4.55997	5.89126	4.51975
2712457	Open Sea	chr1:149294091-149294092	-0.377786	0.001146	4.85239	5.0349	5.86335	2.36086	3.32822	2.68892	2.92866	3.85335	5.77885	4.64105
2712461	Open Sea	chr1:149294098-149294099	-0.377992	0.00498917	5.14683	4.97566	5.88238	2.34121	3.25388	2.90769	3.01643	3.27923	4.81846	2.84825
2712507	Open Sea	chr1:149294708-149294709	-0.209872	0.0241373	2.22258	7.86436	5.22154	2.82454	5.85604	3.70219	5.31514	7.358	2.8969	4.50027
2713079	Open Sea	chr1:149326334-149326335	-0.206141	0.00409779	2.34857	2.53936	3.30465	0.192905	3.20296	5.0769	2.97493	2.96936	1.5324	4.92052
2713085	Open Sea	chr1:149326412-149326413	-0.23416	0.00954027	3.36581	1.0798	6.04859	0.768946	3.38029	6.21579	2.93258	3.56721	2.16925	4.56605
2767799	Open Sea	chr1:151226894-151226895	-0.292803	0.022488	4.56403	1.51016	3.89143	4.02901	2.30931	3.87533	4.0806	5.7567	1.89167	1.78592
2791627	Open Sea	chr1:152161213-152161214	-0.340835	0.00775437	2.69887	1.71275	3.44391	1.65419	1.71275	1.97058	1.98141	2.8152	1.14183	1.80058
3004431	Open Sea	chr1:161390761-161390762	-0.203474	0.0284708	1.92869	1.67897	1.37931	1.92869	1.75336	1.13631	0.923719	1.66708	1.92869	1.92869
3004841	Open Sea	chr1:161397899-161397900	-0.243014	0.0385366	3.30001	0.915975	2.78271	2.84896	0.537014	2.00973	1.94395	2.55863	2.68995	2.59174
3004843	Open Sea	chr1:161397910-161397911	-0.214009	0.0178243	3.4285	0.410964	2.46362	1.7466	0.232879	2.07096	1.64998	3.16265	3.1195	0.737452
3004845	Open Sea	chr1:161397914-161397915	-0.208406	0.0160663	2.69413	-0.468249	3.76575	1.45717	0.176992	0.985526	1.44755	3.00119	3.14162	3.76575
3004847	Open Sea	chr1:161397916-161397917	-0.23373	0.0188608	3.63621	0.297349	3.32561	3.01238	0.243025	1.83816	2.06324	3.0606	2.25666	1.82909
3004849	Open Sea	chr1:161397923-161397924	-0.230304	0.0317149	3.50576	-0.532037	3.96939	2.45565	0.308506	1.88488	1.84371	2.9427	2.65963	2.55227
3004859	Open Sea	chr1:161398033-161398034	-0.215418	0.0318655	1.61439	0.397529	2.57294	2.61305	0.50251	1.99381	1.8755	3.44709	1.9356	1.22327
3011655	Open Sea	chr1:161495385-161495386	-0.30724	0.022338	2.06499	0.474625	5.10113	2.02001	2.90836	3.25748	4.13261	2.73968	0.850529	3.30643
3011657	Open Sea	chr1:161495401-161495402	-0.27579	0.024083	3.17426	1.05643	5.3768	2.56244	3.15348	6.16343	7.16637	3.87507	2.29324	2.62362
3011659	Open Sea	chr1:161495418-161495419	-0.319828	0.0345552	2.10059	2.55413	5.42653	3.39401	3.69279	5.29861	4.74178	3.40538	0.437623	1.68485
3052565	Open Sea	chr1:164290892-164290893	-0.221073	0.0447601	1.89396	1.40649	5.46229	4.89579	0.0659291	3.72978	2.34782	2.21684	4.19207	0.259486
3137075	Open Sea	chr1:169429762-169429763	-0.303776	0.000988466	0.778649	5.57493	10.8592	6.18827	10.2893	5.16826	4.71316	5.48916	8.07532	9.60334
3137079	Open Sea	chr1:169429782-169429783	-0.309107	0.00202658	2.14661	4.73289	10.8415	4.08873	8.46318	2.69099	5.38023	4.95357	9.36237	5.05516
3137081	Open Sea	chr1:169429824-169429825	-0.344142	0.00268241	2.48992	2.60969	6.56823	2.86839	6.61521	4.82195	4.72632	3.99485	5.59722	4.85534
3137085	Open Sea	chr1:169429853-169429854	-0.231526	0.00550531	1.44914	5.8521	6.29628	2.09876	8.36064	6.89524	6.97881	4.07768	4.13309	5.1303
3137089	Open Sea	chr1:169429889-169429890	-0.248691	0.00102707	1.64225	2.90703	5.24921	3.70997	4.75561	3.3624	2.47974	2.4525	4.06036	4.43683
3137091	Open Sea	chr1:169429891-169429892	-0.315648	6.68729e-05	2.1557	2.2495	4.62326	3.07885	3.79305	3.17849	3.16505	3.7275	3.59954	4.02609
3137093	Open Sea	chr1:169429922-169429923	-0.288252	0.00243051	2.36666	5.21893	7.80831	3.81889	5.95415	4.03868	2.93409	4.21942	5.03452	6.08744
3137095	Open Sea	chr1:169429943-169429944	-0.204687	0.00891656	1.69542	2.62441	7.18681	2.75831	2.85791	3.77999	3.85239	3.26024	2.87265	3.66153
3137097	Open Sea	chr1:169429972-169429973	-0.329179	0.000261656	2.24467	1.88965	5.48787	3.35606	4.08245	4.17195	2.77721	4.39193	3.54235	3.66477
3137099	Open Sea	chr1:169430053-169430054	-0.211254	0.00452017	0.915118	1.67148	3.22169	1.71423	2.41485	1.93287	1.50112	1.71724	1.41497	2.16655
3137187	Open Sea	chr1:169435182-169435183	-0.212614	0.00613197	0.415706	1.21233	3.28239	1.83635	2.19027	1.79734	-0.133215	1.76153	1.54662	2.29879
3380797	Open Sea	chr1:184725106-184725107	-0.224132	0.024125	1.85941	3.6547	4.15632	3.80275	4.51078	0.301955	2.66928	2.78794	3.6547	2.68964
3518939	Open Sea	chr1:196578635-196578636	-0.29476	0.027493	2.50921	4.29679	2.12787	3.60104	3.35976	3.43386	5.21483	3.29982	4.44657	2.61177
3518941	Open Sea	chr1:196578679-196578680	-0.337656	0.0253138	3.51211	2.52151	2.52151	1.89114	3.49605	3.12448	4.25505	3.21493	1.68941	2.11362
3739805	Open Sea	chr1:207818003-207818004	-0.280338	0.00686681	5.76746	3.27784	7.11608	3.24036	4.67629	5.98532	5.22665	2.11954	2.73341	2.75729
3739809	Open Sea	chr1:207818125-207818126	-0.295292	0.02002	5.84451	2.03729	5.44247	4.61226	4.0886	5.59412	5.83316	1.34215	2.74907	5.03085
3840821	Open Sea	chr1:213224402-213224403	-0.307772	0.0441498	2.48897	3.25701	4.43319	5.74646	2.98774	2.98087	5.0248	2.74281	4.30154	1.82745
3953893	Open Sea	chr1:220863207-220863208	-0.237971	0.040407	3.1998	2.09655	0.940759	2.41909	3.99379	3.88616	0.959706	1.89841	2.74668	3.98784
3953911	Open Sea	chr1:220863347-220863348	-0.231881	0.0115013	2.44614	2.35375	4.17708	2.90627	3.01678	5.61988	2.64046	2.26415	3.92484	2.66869
3953913	Open Sea	chr1:220863358-220863359	-0.270454	0.00241272	2.84142	3.96032	4.74712	2.06466	3.59517	5.70628	3.98132	3.56559	3.38006	2.59888
4043679	Open Sea	chr1:225838196-225838197	0.231834	0.0318516	-1.75179	-2.63785	-1.34396	-2.5446	-1.67069	-1.49742	-3.18153	-2.94127	-2.43304	-3.1708
4093813	Open Sea	chr1:227747124-227747125	-0.309487	0.0346361	6.11796	3.04559	3.79292	0.928141	3.28192	6.99578	3.39434	1.90679	4.64702	0.928141
4093815	Open Sea	chr1:227747126-227747127	-0.334608	0.0387496	6.12983	3.48114	4.9018	0.450722	3.746	6.65956	5.1763	1.95814	3.8998	1.50241
4181145	Open Sea	chr1:230777685-230777686	-0.25491	0.0395109	3.00415	1.81971	1.91572	1.76784	3.69822	4.18224	3.17767	3.02678	3.27974	3.44462
4432997	Open Sea	chr1:243264842-243264843	-0.391984	0.0495409	1.89645	2.55362	3.72712	3.11831	2.37502	2.63211	3.03648	2.1248	1.99336	1.21312
4496557	Island2430	chr1:245851576-245851577	-0.265014	0.0831625	0.390938	2.04882	4.69345	0.684355	1.44292	3.83306	2.14025	1.05388	3.87526	4.69345
4496569	Island2430	chr1:245851663-245851664	-0.133413	0.522992	1.67587	3.52815	4.39981	1.88168	1.28296	3.41838	0.690616	0.586703	2.18104	7.94761
4496571	Island2430	chr1:245851689-245851690	-0.278165	0.0301395	2.22572	3.34284	4.93873	0.982258	2.67789	4.48656	1.61962	1.77355	8.02169	6.93358
4496573	Island2430	chr1:245851694-245851695	-0.256297	0.456328	2.35898	2.29037	3.87823	0.334124	2.28062	4.42516	1.96398	1.63057	8.14428	5.41647
4496575	Island2430	chr1:245851700-245851701	-0.302324	0.0209079	2.00661	3.22076	4.97453	3.22076	3.41035	4.80964	2.43224	1.80457	10.1189	4.59626
4496577	Island2430	chr1:245851704-245851705	-0.288579	0.0276968	1.44599	3.05677	4.08933	1.695	3.35507	5.17623	3.8207	2.95174	5.74142	6.03971
4496579	Island2430	chr1:245851711-245851712	-0.292797	0.0112573	2.5824	3.47399	4.97992	1.15423	4.11139	5.52276	4.97992	1.7591	9.75687	5.99321
4545923	Open Sea	chr1:247802657-247802658	-0.35381	0.0364104	3.06016	1.43621	3.62406	1.43621	2.14856	2.68959	3.82029	2.23398	2.31902	1.02204
4788711	Open Sea	chr2:9283292-9283293	-0.241535	0.0382027	2.13148	2.57651	3.55559	6.77255	3.81863	3.71877	3.06605	2.25016	3.06605	3.80036
4799035	Open Sea	chr2:9613710-9613711	-0.227663	0.00591543	2.10163	1.22797	2.99927	2.41392	2.93646	1.73378	3.18771	2.14395	1.95524	2.11507
4799037	Open Sea	chr2:9613721-9613722	-0.23915	0.00594131	2.37987	1.88464	3.02513	4.04287	3.89556	1.98489	2.65481	2.01719	2.81082	0.510581
4799041	Open Sea	chr2:9613841-9613842	-0.280388	0.00443224	3.33995	3.05792	3.56677	3.64079	2.18095	2.75643	2.52263	3.05792	1.23244	2.30851
4799043	Open Sea	chr2:9613852-9613853	-0.29326	0.00651931	2.14335	2.53735	4.0719	3.49661	3.0079	3.20242	2.52579	2.45616	2.36399	1.55498
4799045	Open Sea	chr2:9613880-9613881	-0.310075	0.00200456	2.27198	3.23014	3.24949	3.84686	2.78579	3.33274	3.24949	2.46097	2.83894	2.1145
4799047	Open Sea	chr2:9613887-9613888	-0.282408	0.00209052	2.45548	2.82065	3.2546	2.29265	2.05855	2.14067	3.68213	1.93626	3.08509	2.16399
4799049	Open Sea	chr2:9613892-9613893	-0.325576	0.00395009	3.94832	2.14289	3.02634	4.17254	2.14729	2.67093	3.54879	2.81454	3.637	1.53362
4799053	Open Sea	chr2:9613910-9613911	-0.346799	0.000920289	2.46423	2.4213	3.37962	2.97588	2.09666	3.29631	3.69685	2.18515	3.10697	1.94594
5063059	Open Sea	chr2:23886193-23886194	-0.24693	0.0121662	2.61628	1.10689	0.213574	2.05565	1.75377	3.59739	2.51962	2.73308	1.76315	3.17691
5074247	Open Sea	chr2:24308274-24308275	-0.224848	0.0175639	2.12943	2.35421	1.07325	2.98889	2.47888	3.08704	2.68506	2.91452	2.98889	2.45999
5101889	Open Sea	chr2:25427064-25427065	-0.260296	0.0241694	1.06571	0.624353	1.96225	2.83673	2.89174	2.78603	1.84904	1.53935	-0.312176	0.686788
5158857	Open Sea	chr2:27342096-27342097	-0.210331	0.0255	0.926737	1.85347	3.45062	1.97613	5.60148	5.79211	9.48594	5.19586	2.73809	5.13015
5158865	Open Sea	chr2:27342148-27342149	-0.229442	0.0313619	1.6772	0.920241	1.91458	1.2484	2.80828	1.87017	2.89281	2.56889	1.45565	3.14643
5179223	Open Sea	chr2:27988897-27988898	-0.314948	0.0175885	2.19182	3.88266	3.49725	4.99607	4.23196	4.44095	2.89772	5.24888	3.19748	4.20721
5266581	Open Sea	chr2:32502699-32502700	-0.200599	0.023381	1.15078	4.50328	4.22339	1.51092	2.82542	3.52451	1.79892	2.73218	3.4782	4.10747
5281515	Open Sea	chr2:33173192-33173193	-0.210687	0.0122524	1.44371	0.753068	4.07424	2.56877	2.59393	2.43335	2.41638	5.01607	3.90218	2.23542
5380783	Open Sea	chr2:39005043-39005044	-0.217731	0.0105784	3.02187	0.547273	2.67502	1.57446	5.99138	3.0902	3.89591	1.00273	3.73156	1.34101
5469945	Open Sea	chr2:43903325-43903326	-0.325206	0.0485926	1.51394	1.61568	3.33672	2.72206	3.04747	3.56929	2.98549	2.54128	0.878084	2.29653
5469951	Open Sea	chr2:43903452-43903453	-0.388198	0.00557618	3.56914	2.51218	3.42392	3.15007	3.21628	4.4566	3.81026	2.74609	2.85052	3.68543
5469997	Open Sea	chr2:43903807-43903808	-0.335454	0.00917512	2.34101	2.1115	2.89184	3.21949	3.20168	6.3192	5.43941	1.0511	4.94453	4.09364
5545239	Open Sea	chr2:47499880-47499881	-0.207661	0.0170455	1.34868	2.2516	3.49034	2.32447	0.0343517	1.72331	2.033	3.55423	1.34868	3.12601
5590933	Open Sea	chr2:50201293-50201294	-0.337709	0.047535	1.76218	3.76777	5.65057	5.59776	2.94561	3.87692	3.19475	3.83144	4.59548	3.71568
5590935	Open Sea	chr2:50201323-50201324	-0.323029	0.0207356	1.78886	4.40189	3.99373	5.30579	2.97365	4.91229	3.4353	5.06723	4.19821	5.63284
5590937	Open Sea	chr2:50201342-50201343	-0.350495	0.00772183	2.61849	3.48477	4.77435	5.4136	2.6093	4.96905	3.99381	4.89837	4.72801	5.88642
5590939	Open Sea	chr2:50201356-50201357	-0.326482	0.0381624	1.48376	2.63379	5.18527	5.22959	1.92533	4.7864	3.92399	5.11953	4.56009	4.8972
5590943	Open Sea	chr2:50201389-50201390	-0.369844	0.00807441	2.32634	2.56991	4.23147	4.93109	2.83896	4.84299	3.10653	5.04291	4.44315	5.68016
5590945	Open Sea	chr2:50201413-50201414	-0.352499	0.0104165	1.90897	2.06697	5.10547	5.49016	2.02217	3.79931	3.36989	5.0332	5.06501	4.85
5590947	Open Sea	chr2:50201426-50201427	-0.347618	0.00366553	2.88238	2.36233	6.20851	5.48746	2.79992	4.41984	3.0748	6.15353	4.04973	5.64041
5590949	Open Sea	chr2:50201452-50201453	-0.378587	0.0026249	2.13903	1.89654	5.23388	6.33936	3.77927	3.51569	4.76785	5.19871	4.25299	5.45294
5590951	Open Sea	chr2:50201479-50201480	-0.2995	0.0230573	1.38602	1.44814	3.69571	3.69571	3.13891	1.4297	3.61524	3.71761	3.64781	4.33679
5590953	Open Sea	chr2:50201505-50201506	-0.305097	0.0351713	1.18589	1.98491	3.30036	4.13944	3.68535	1.99141	3.48344	3.80381	2.02239	5.89504
5590955	Open Sea	chr2:50201511-50201512	-0.334328	0.0113157	0.912392	1.57417	4.15128	5.72909	4.24662	2.45967	3.43259	4.57639	2.35456	5.01866
5590957	Open Sea	chr2:50201542-50201543	-0.307539	0.0129534	1.27037	2.69667	4.08436	4.51651	3.35888	2.25319	2.4297	4.69766	2.94117	4.82083
5590961	Open Sea	chr2:50201571-50201572	-0.363405	0.00487875	1.01982	3.03408	4.55705	3.37287	4.11667	2.47241	3.4289	5.16929	3.1169	6.5609
5821881	Open Sea	chr2:65086738-65086739	-0.218363	0.0413196	0.835164	-0.885197	3.58845	2.4011	1.5887	2.34057	-0.171507	2.25409	2.4011	3.24304
5934767	Open Sea	chr2:71205266-71205267	-0.232431	0.0149878	1.06027	1.11986	3.68204	1.68294	2.65739	3.55344	2.46569	2.4243	2.26656	1.84885
5934771	Open Sea	chr2:71205304-71205305	-0.274217	0.00119045	1.40757	1.52736	3.72965	3.66296	2.84043	3.8072	3.62076	1.81703	3.8697	1.59552
6036331	Open Sea	chr2:75938223-75938224	-0.207249	0.00485082	5.44953	4.28749	4.41033	2.92147	10.5194	5.27281	6.8469	6.96361	7.34494	1.95354
6036343	Open Sea	chr2:75938338-75938339	-0.21159	0.00734239	2.06977	1.59316	3.85793	3.38397	4.13342	0.922325	2.7704	3.13391	1.31781	2.81417
6036345	Open Sea	chr2:75938360-75938361	-0.212842	0.0132794	2.79343	1.99746	3.90021	4.30166	4.48462	1.7258	3.35511	4.01009	1.59805	2.81567
6036347	Open Sea	chr2:75938415-75938416	-0.208877	0.0300786	3.66423	4.08365	4.64468	5.78231	6.32411	2.48633	5.76063	4.82636	1.62318	2.67724
6198865	Island3067	chr2:87036897-87036898	-0.296072	0.402562	4.47062	9.66159	6.28467	3.87258	2.6141	4.27741	5.396	6.87986	7.81963	4.13572
6198867	Island3067	chr2:87036899-87036900	-0.245747	0.440948	8.01554	10.618	7.31488	3.87528	2.4712	5.91357	4.37211	6.71432	12.5698	7.10469
6198869	Island3067	chr2:87036908-87036909	-0.410754	0.000105437	8.39311	9.52092	8.68808	8.0725	5.44346	7.99743	6.11383	8.08702	7.43881	6.23759
6198871	Island3067	chr2:87036920-87036921	-0.345331	0.285476	5.48977	7.00364	4.35039	4.45397	5.74873	4.41697	4.47751	4.9192	5.74873	3.05961
6198873	Island3067	chr2:87036935-87036936	-0.258882	0.128942	3.89166	4.82328	2.81031	1.16334	3.3593	3.6033	3.06651	3.32748	4.01424	0.065356
6198875	Island3067	chr2:87036940-87036941	-0.364328	0.000658009	3.57802	6.59757	5.37213	4.1423	4.10989	2.65177	6.17275	4.58972	4.23746	3.94245
6198877	Island3067	chr2:87036948-87036949	-0.33649	0.402265	2.77024	5.55517	8.19193	2.2853	3.89997	5.82074	5.87385	3.73409	4.10558	0.587385
6198879	Island3067	chr2:87036973-87036974	-0.20994	0.404351	4.28553	7.81728	4.12272	1.2437	2.82592	5.43982	4.07652	5.66934	4.69253	-0.150831
6198881	Island3067	chr2:87036989-87036990	-0.262323	0.0611805	5.07369	4.95763	2.74825	2.77174	2.69436	2.32735	4.43791	4.52465	5.43543	1.37412
6198883	Island3067	chr2:87037000-87037001	-0.244666	0.0431889	3.55426	4.5135	1.31923	2.24202	3.15466	3.65422	4.85298	4.23649	4.37153	-0.632827
6198885	Open Sea	chr2:87037038-87037039	-0.284281	0.023897	4.20447	6.99015	2.46422	2.62341	4.67163	5.5811	8.08504	6.16656	6.49733	-1.29422
6198889	Open Sea	chr2:87037082-87037083	-0.278353	0.0213819	5.56831	4.34509	3.73348	3.5133	1.87571	4.6173	5.86188	4.7134	4.63421	-2.65173
6654033	Shore	chr2:112895563-112895564	-0.292305	0.033764	2.19648	2.96499	3.46156	1.86077	3.99198	4.05123	2.65759	4.15414	1.74369	1.86619
6753067	Open Sea	chr2:118942841-118942842	-0.288466	0.0155365	1.84016	1.9773	4.92579	3.01457	3.03378	3.81254	4.55768	3.69154	3.40355	2.60128
6753075	Open Sea	chr2:118942960-118942961	-0.274789	0.0277082	4.03814	1.15202	6.3696	4.39284	3.59399	5.22761	4.83171	4.19224	4.07765	3.65039
6753077	Open Sea	chr2:118943004-118943005	-0.347269	0.0175185	3.32593	1.54287	6.12417	4.25111	4.1311	3.85657	4.58344	4.82758	3.54671	3.82064
6753079	Open Sea	chr2:118943059-118943060	-0.294669	0.00554163	3.08825	1.44925	9.08254	4.59242	4.15346	3.16979	8.55106	4.25439	9.56005	4.96355
6808763	Open Sea	chr2:121412386-121412387	-0.269593	0.0056969	1.44748	2.6537	3.07588	2.50018	1.38716	3.63552	2.78361	1.57906	2.31596	2.50018
6808765	Open Sea	chr2:121412390-121412391	-0.344873	0.00902038	2.33403	2.47803	3.15307	2.80205	5.03815	3.21807	4.90814	3.64449	3.15307	2.33403
6967007	Open Sea	chr2:129659633-129659634	-0.270219	0.0329766	2.52156	1.58926	2.9847	2.49989	1.43936	3.35204	2.59912	3.81878	4.41385	3.69696
6967009	Island3388	chr2:129659682-129659683	-0.281458	0.10883	1.26813	1.30511	2.18291	2.59071	1.04348	2.2971	0.940555	2.85719	3.25802	3.40631
6967011	Island3388	chr2:129659688-129659689	-0.312877	0.0539429	1.41357	1.64076	2.54719	2.49269	0.803167	2.4413	0.255502	2.81007	3.20119	3.18443
6967013	Island3388	chr2:129659699-129659700	-0.341517	0.0524708	1.26981	1.84927	2.79358	2.65193	0.71315	2.225	1.78888	3.32972	3.25185	3.90652
6967015	Island3388	chr2:129659730-129659731	-0.331842	0.0338931	1.97917	1.94565	2.10396	3.47668	1.20702	3.77618	2.17034	3.90454	4.94015	5.01937
6967017	Island3388	chr2:129659736-129659737	-0.318695	0.0244472	2.47876	2.21937	3.05454	3.50217	1.16295	3.25309	1.56977	4.06616	3.89204	4.80174
6967019	Island3388	chr2:129659743-129659744	-0.318135	0.079015	1.53628	2.01142	2.31686	2.79365	1.08274	2.53407	2.02725	3.47529	4.10355	3.9459
6967021	Island3388	chr2:129659754-129659755	-0.259518	0.0481001	1.58156	1.76493	2.36393	2.31503	1.48589	2.29547	2.02164	2.53036	3.95457	5.70419
6967023	Island3388	chr2:129659769-129659770	-0.243072	0.208975	1.92055	1.58106	2.15994	3.0162	1.11753	2.58807	0.634236	2.60807	5.09568	5.09568
6967025	Island3388	chr2:129659801-129659802	-0.235902	0.255831	1.51963	2.47633	1.7814	3.45425	1.48508	2.92914	0.992171	2.97819	3.53231	2.55719
6967027	Island3388	chr2:129659804-129659805	-0.262552	0.205964	0.381982	2.17462	2.64942	2.92427	1.22374	3.78221	1.89576	2.07545	3.3471	3.96725
6967029	Island3388	chr2:129659807-129659808	-0.25524	0.129687	2.19726	2.71258	2.01537	3.82827	1.5207	3.10672	1.68404	3.18673	4.05863	4.48707
6967031	Island3388	chr2:129659832-129659833	-0.239297	0.166943	1.71804	2.24255	1.33715	3.37125	0.731915	3.40861	1.16697	3.57861	2.1543	2.82018
6967033	Island3388	chr2:129659834-129659835	-0.271518	0.158546	1.98859	2.05095	2.27268	3.6931	1.43538	3.93931	1.09425	3.82003	2.14281	3.09911
6967035	Island3388	chr2:129659867-129659868	-0.314054	0.135967	1.19744	1.92557	1.19744	2.96177	1.33294	3.87223	2.13361	3.09967	3.43218	4.67467
6967037	Island3388	chr2:129659869-129659870	-0.30537	0.0605706	1.89551	2.04127	1.53852	3.00084	1.65718	4.03891	1.44426	3.2353	3.69324	4.56748
6967039	Island3388	chr2:129659876-129659877	-0.26858	0.183764	0.873512	2.06246	1.21321	1.7907	1.23556	2.60943	1.13309	2.57201	3.07094	4.41719
6967041	Island3388	chr2:129659905-129659906	-0.304457	0.0280858	0.794421	2.41107	1.95957	4.42969	1.24838	5.30673	1.82717	4.51539	5.16374	4.78922
6967043	Island3388	chr2:129659914-129659915	-0.309815	0.0107115	1.39446	2.26664	2.95513	3.26846	1.57986	4.02922	2.428	3.27641	3.94549	3.33849
6967045	Island3388	chr2:129659926-129659927	-0.307108	0.0167805	1.08315	1.6703	1.50016	3.69781	1.70755	3.91851	2.52809	3.61524	3.36361	5.18654
6967047	Island3388	chr2:129659938-129659939	-0.337453	0.00554916	1.94198	2.94041	2.97054	4.61385	1.0286	5.32733	3.50081	4.65665	5.96661	2.94041
6967049	Island3388	chr2:129659946-129659947	-0.338374	0.01251	1.99317	1.53728	4.23828	3.82886	1.22251	4.04316	2.00117	4.11273	4.74229	3.94104
6985239	Open Sea	chr2:130681337-130681338	-0.205516	0.0495308	1.73945	2.95379	3.81904	1.92543	3.20566	1.52782	2.29739	1.3038	2.56308	2.29739
6987031	Open Sea	chr2:130750811-130750812	-0.457197	0.00838744	8.2337	2.81643	6.20124	3.88251	3.88251	7.64624	4.39779	7.40222	4.29473	7.2552
6987033	Open Sea	chr2:130750824-130750825	-0.465218	0.00523414	6.8388	2.75507	5.31301	1.71651	2.61827	6.91509	4.16867	5.28078	6.91509	5.14954
6987037	Open Sea	chr2:130750842-130750843	-0.394167	0.00409779	4.61426	1.93151	3.15597	0.9281	2.01088	5.15009	3.74946	3.48364	4.39043	3.19913
6987825	Open Sea	chr2:130794932-130794933	-0.332845	0.0332394	3.00919	2.4018	2.36442	2.49898	0.598313	0.303068	3.02837	1.68681	2.28032	2.06166
6994833	Open Sea	chr2:131010236-131010237	-0.430545	0.0144811	4.09659	2.07663	2.33354	3.66884	1.94472	3.34957	2.19613	3.48508	3.71161	3.65758
6994835	Open Sea	chr2:131010362-131010363	-0.235851	0.00313023	2.85951	2.49696	0.930414	3.38783	2.09608	2.0159	3.11834	2.58168	2.26789	3.02385
6994837	Open Sea	chr2:131010408-131010409	-0.389343	0.00925842	4.45107	2.88872	2.10754	2.94532	2.78857	0.827285	3.62461	3.98068	3.38947	4.37667
6994839	Open Sea	chr2:131010423-131010424	-0.407861	0.00440961	4.84491	2.76427	2.14152	3.57052	2.33428	1.57103	3.69746	4.05427	3.28027	4.05427
7035989	Island3441	chr2:132404285-132404286	-0.344768	0.13437	3.11098	2.02385	1.94368	3.89569	2.11636	1.87008	1.49472	3.3722	3.22643	2.16816
7035991	Island3441	chr2:132404287-132404288	-0.318435	0.244113	3.12327	1.94839	2.39174	0.776277	1.40511	1.83438	2.36735	3.1633	2.33078	1.36917
7035993	Island3441	chr2:132404295-132404296	-0.389899	0.0975433	2.84474	2.24872	2.74937	2.23441	2.0192	1.75906	2.74937	3.76479	2.47629	2.70498
7035995	Island3441	chr2:132404298-132404299	-0.372505	0.337849	2.89883	1.95146	2.78046	3.63271	2.37001	1.90027	1.53114	3.0823	3.0135	2.49393
7035997	Island3441	chr2:132404312-132404313	-0.419436	0.00922952	3.36729	2.92373	3.24486	3.8041	2.67352	2.45232	2.61571	3.96855	2.79966	2.82219
7035999	Island3441	chr2:132404315-132404316	-0.431942	0.0307648	3.70644	2.59675	3.45349	3.76156	1.96594	2.15364	3.70644	3.81959	3.57206	2.98976
7036001	Island3441	chr2:132404324-132404325	-0.426524	0.0089172	2.75794	3.54777	3.30212	4.63473	2.46713	3.06452	3.06452	4.06016	3.84719	2.86789
7036003	Island3441	chr2:132404336-132404337	-0.450269	0.0100738	3.39634	3.28011	3.11196	4.27492	2.34525	3.08567	2.74394	4.28175	3.62526	3.7008
7036005	Island3441	chr2:132404343-132404344	-0.426387	0.00275817	3.56739	2.87239	2.79289	4.16196	2.47146	3.34667	3.2668	3.32096	3.7407	3.53219
7036007	Island3441	chr2:132404351-132404352	-0.416604	0.0118623	2.89406	3.43929	3.86868	4.20954	2.10477	3.44493	3.65565	4.20954	3.59271	3.20897
7036009	Island3441	chr2:132404376-132404377	-0.398963	0.00999584	3.29193	2.28534	3.74164	4.30458	1.43083	3.68372	4.18236	3.18199	3.29193	5.11374
7036011	Island3441	chr2:132404387-132404388	-0.427557	0.00633057	4.01826	2.87663	4.01826	4.68956	2.28011	2.60107	2.7316	3.39901	3.47639	4.05491
7036013	Island3441	chr2:132404394-132404395	-0.431882	0.0131919	3.70672	2.59955	4.28351	5.49944	2.12564	3.54347	4.10603	3.29604	4.10603	5.24482
7036015	Island3441	chr2:132404402-132404403	-0.424895	0.00498661	3.91715	2.53117	3.99687	4.1771	1.73834	3.54059	3.00366	3.0693	4.46411	4.51324
7036017	Island3441	chr2:132404424-132404425	-0.425536	0.0149652	3.61761	2.85299	2.85299	4.68852	1.60745	3.53559	2.85041	2.95366	4.09905	3.8195
7036019	Island3441	chr2:132404442-132404443	-0.439457	0.0062581	5.99576	3.57189	3.37713	5.86032	1.92861	5.36368	5.08432	3.791	5.50557	5.72962
7036021	Island3441	chr2:132404480-132404481	-0.358231	0.00800566	4.53914	2.72884	3.95254	6.06712	1.93929	4.65192	5.47598	4.0735	6.89072	3.3233
7036023	Island3441	chr2:132404483-132404484	-0.268752	0.00651931	6.91889	4.94047	4.00124	4.55155	1.98172	3.00499	5.42209	4.63813	7.06153	5.21416
7036025	Island3441	chr2:132404503-132404504	-0.406609	0.0372209	3.31685	2.40134	3.59258	5.28752	2.40382	5.10537	3.68461	3.96204	5.02341	3.24746
7036027	Island3441	chr2:132404539-132404540	-0.395111	0.00956996	4.8252	2.88748	3.92611	7.23794	2.82526	4.69687	4.27179	5.00666	5.57219	3.55494
7036029	Island3441	chr2:132404557-132404558	-0.386938	0.0058764	5.07467	2.49842	3.6345	6.2873	1.80815	4.53942	3.91303	3.97615	4.74875	4.90177
7036031	Island3441	chr2:132404571-132404572	-0.371965	0.0062686	4.38707	2.98156	3.36505	6.17435	1.88047	4.71666	3.45978	5.26221	6.18813	3.93977
7036033	Island3441	chr2:132404574-132404575	-0.324134	0.0186613	6.68444	3.08182	4.30215	6.34095	1.39724	3.39657	4.36154	5.19729	5.32862	4.18037
7036035	Island3441	chr2:132404595-132404596	-0.351681	0.0109821	5.69257	2.79929	3.83164	5.93648	2.89921	3.918	3.08027	6.53175	7.51901	4.86327
7036037	Island3441	chr2:132404600-132404601	-0.358846	0.074438	5.01699	2.33764	1.99036	4.60196	2.09722	3.97343	3.33634	5.23993	6.78811	4.06821
7036039	Island3441	chr2:132404608-132404609	-0.366546	0.00769416	6.16225	2.2795	3.37265	4.55044	2.41101	4.50195	4.11639	5.10223	6.81034	4.31606
7036041	Island3441	chr2:132404611-132404612	-0.401777	0.00404497	5.44249	2.05986	3.536	5.54451	3.50969	4.59157	4.01998	4.92072	6.73687	4.42696
7036043	Island3441	chr2:132404623-132404624	-0.323069	0.0104165	7.3471	2.41055	4.75616	6.95743	1.95956	5.47578	4.36047	5.2003	9.45519	4.05112
7036045	Island3441	chr2:132404637-132404638	-0.416023	0.00899751	5.23714	2.1654	3.37174	6.14159	1.78857	4.10861	4.10012	4.3901	6.42829	5.12356
7036047	Island3441	chr2:132404694-132404695	-0.312378	0.00403015	5.88304	1.83888	2.05664	5.94952	3.52417	4.79558	4.34315	4.28781	7.5007	4.18242
7036049	Island3441	chr2:132404711-132404712	-0.322087	0.00403444	6.4235	2.01967	2.41318	5.43046	2.22371	6.75507	5.80299	5.29066	7.32852	5.03628
7036051	Island3441	chr2:132404720-132404721	-0.39594	0.0131435	4.66011	2.18123	2.47263	5.22182	2.87842	4.02129	4.66011	4.9316	4.78305	3.21909
7036053	Island3441	chr2:132404731-132404732	-0.411972	0.00121625	4.74574	3.0569	3.87964	6.17809	3.64867	4.21465	5.02979	5.16429	6.2364	5.4153
7036055	Island3441	chr2:132404738-132404739	-0.380684	0.00522937	4.37816	2.55784	2.86968	4.65701	2.95717	5.56581	4.23051	4.87303	3.44333	3.61053
7036057	Island3441	chr2:132404743-132404744	-0.339175	0.0041182	4.37981	3.16431	3.64314	5.62293	3.34751	3.94841	4.01783	4.88468	4.2894	4.62537
7036059	Island3441	chr2:132404761-132404762	-0.414372	0.0108191	4.52746	2.35326	3.01838	4.83946	3.02984	3.25765	3.85888	5.35649	5.21208	3.23659
7036061	Island3441	chr2:132404765-132404766	-0.391728	0.0428626	3.60996	1.71027	2.86875	3.20555	2.55087	2.69041	2.81984	4.03601	3.72458	2.91765
7036063	Island3441	chr2:132404781-132404782	-0.283064	0.157784	4.31616	0.957334	1.69628	3.13069	1.85636	2.65793	2.05864	3.42405	2.94143	2.02312
7036065	Island3441	chr2:132404783-132404784	-0.0258153	0.962479	2.36633	-0.265228	3.69758	2.37665	2.79695	-0.265228	-0.265228	-0.265228	-0.265228	-0.265228
7036067	Island3441	chr2:132404790-132404791	-0.442376	0.00452009	4.21021	1.7902	3.96896	4.74094	2.37623	5.14724	3.41411	5.05372	4.58654	4.74094
7036069	Island3441	chr2:132404794-132404795	-0.362016	0.0204002	3.01297	0.985407	1.54482	2.94755	2.59714	2.69666	3.25781	4.0332	4.27515	3.69841
7036071	Island3441	chr2:132404798-132404799	-0.386675	0.0139961	4.98392	1.75051	3.00683	5.2988	2.47695	4.34701	4.47628	4.1933	5.4718	4.09717
7036073	Island3441	chr2:132404804-132404805	-0.394427	0.0157878	4.87082	2.1683	3.14126	6.12143	2.25351	2.76766	2.57552	4.36204	5.72216	4.43142
7036075	Island3441	chr2:132404808-132404809	-0.403141	0.00827255	5.77209	3.01385	3.73238	6.58656	3.49613	3.21939	3.67898	2.92736	5.83185	2.7444
7036077	Island3441	chr2:132404851-132404852	-0.300631	0.102009	4.74521	1.04967	2.74286	3.20286	2.68874	1.56019	1.6605	2.62447	3.42319	2.52135
7036079	Island3441	chr2:132404853-132404854	-0.265461	0.0856289	4.43914	1.47841	3.35093	4.23029	2.74515	1.13624	2.27308	2.2043	4.0939	2.20981
7036081	Island3441	chr2:132404860-132404861	-0.377898	0.0617215	3.58217	1.46593	2.90353	3.15916	2.63164	2.04531	2.36006	2.55427	3.84197	2.96965
7036083	Island3441	chr2:132404882-132404883	-0.323028	0.0284494	2.15877	1.25669	2.89722	2.51122	0.808243	1.28702	2.91126	2.68667	3.3303	3.26052
7036085	Island3441	chr2:132404884-132404885	-0.318853	0.0286399	2.96987	1.19733	2.53137	3.16891	1.68726	2.89944	2.78863	1.87774	2.85937	2.23629
7036087	Island3441	chr2:132404896-132404897	-0.279839	0.0754767	2.94401	1.09296	1.96902	2.34388	1.27686	1.67019	3.23419	2.7155	2.77474	2.24359
7036089	Island3441	chr2:132404927-132404928	-0.273985	0.345343	3.1867	1.41631	2.19528	2.19528	1.08947	1.97625	2.41749	1.69957	2.54012	3.1867
7036091	Island3441	chr2:132404939-132404940	-0.426981	0.0276644	3.67684	1.7641	0.0804529	2.38006	1.53045	3.17486	3.65763	2.98523	3.612	2.86318
7036653	Open Sea	chr2:132429988-132429989	-0.275062	0.0198742	3.50604	2.6802	3.50604	0.389334	0.154112	3.7513	2.49514	3.60181	2.83565	1.64386
7036747	Open Sea	chr2:132431108-132431109	-0.458931	0.000173782	5.44627	2.97206	5.24347	5.51648	5.44627	4.39773	6.6631	7.08899	9.09675	7.21263
7036749	Open Sea	chr2:132431136-132431137	-0.311248	0.00200924	5.79356	2.49275	2.95377	6.61852	5.08819	3.78628	6.78605	5.16426	10.3461	8.66159
7039173	Open Sea	chr2:132560544-132560545	-0.3855	0.0472267	4.07118	1.79141	1.98331	4.20627	2.07613	2.1573	4.07118	3.03114	2.96907	2.36259
7039177	Open Sea	chr2:132560599-132560600	-0.216988	0.0482359	2.06741	2.0408	1.38872	1.73878	1.6721	1.64786	1.22104	1.68501	2.02217	2.07677
7039183	Open Sea	chr2:132560615-132560616	-0.253278	0.0127296	2.16645	1.85089	2.14979	2.29731	1.49713	1.98845	2.46229	2.45294	2.36822	2.24747
7050093	Open Sea	chr2:133109860-133109861	-0.243236	0.00452009	2.96977	2.28942	2.28942	1.82582	1.84189	2.4734	1.54428	2.22487	2.70871	1.96747
7050097	Open Sea	chr2:133109869-133109870	-0.214079	0.0308898	2.72212	2.26194	1.89625	0.839285	0.562073	3.03639	2.52342	2.59266	2.59266	1.55179
7639767	Open Sea	chr2:174877511-174877512	-0.210867	0.00281567	0.885098	2.44616	5.28456	6.89974	4.27406	1.84395	3.33018	3.23866	2.78102	1.06488
7697095	Open Sea	chr2:178030199-178030200	-0.22842	0.0440125	2.08292	3.12412	4.13184	4.68872	1.15172	3.31467	2.63449	2.73016	4.31343	-0.161215
7703687	Open Sea	chr2:178417116-178417117	-0.236711	0.0418408	1.64656	2.25042	2.71399	1.64656	2.42426	2.28393	2.86785	1.5771	2.51118	1.1422
7704937	Open Sea	chr2:178484058-178484059	-0.283846	0.0403482	1.58949	2.56616	4.219	2.05974	4.3848	2.89538	2.34912	1.97826	3.54284	2.61625
7876467	Open Sea	chr2:192111180-192111181	-0.201623	0.0255022	2.16268	1.37806	2.94385	4.4766	2.05178	1.6572	1.60574	1.55574	1.15412	3.31441
7944539	Open Sea	chr2:197504013-197504014	-0.225473	0.00288389	2.79103	2.23044	3.83941	2.75407	2.75876	2.05716	2.32768	2.70507	1.77663	3.20289
8143803	Open Sea	chr2:208635422-208635423	-0.203066	0.0377632	3.49862	5.26714	2.83092	4.62383	3.43371	3.86831	3.94376	3.78848	0.72888	2.06049
8713723	Open Sea	chr2:238384477-238384478	-0.235457	0.00740225	1.96158	2.67678	3.24675	3.34194	0.630507	1.40531	2.65605	2.3246	3.73634	2.60049
8713731	Open Sea	chr2:238384598-238384599	-0.26944	0.0314027	2.62262	2.60209	2.62262	2.71981	3.3707	1.47727	3.66868	2.81051	3.52293	6.63663
8807589	Open Sea	chr2:241076313-241076314	-0.210444	0.00133165	2.64406	6.35134	8.51553	5.4144	2.4511	3.03447	1.23462	3.42811	3.7375	3.6571
8807597	Open Sea	chr2:241076380-241076381	-0.266324	0.00572705	1.48198	6.95008	4.1846	12.481	4.69561	5.0943	5.53728	2.94014	6.35089	3.24182
8807599	Open Sea	chr2:241076409-241076410	-0.248506	0.0113124	2.40965	3.47821	3.74194	4.941	4.16753	4.32925	3.19718	2.26726	3.67532	2.75244
8807601	Open Sea	chr2:241076416-241076417	-0.249403	0.0127559	1.85609	4.06403	3.66807	6.16661	2.91888	2.80379	1.71963	1.9075	2.76918	2.23274
8807603	Open Sea	chr2:241076432-241076433	-0.251289	0.00463367	2.52061	6.15001	4.80236	7.11262	5.50004	4.41731	5.07072	2.37284	5.82914	2.96599
8942317	Open Sea	chr3:3168139-3168140	-0.223714	0.0105475	1.73478	1.96258	3.10158	2.45838	3.41222	2.06725	3.10158	2.93954	3.93143	1.73478
8942319	Open Sea	chr3:3168142-3168143	-0.209731	0.0412023	3.84593	2.18922	2.82035	2.57903	0.420875	1.69642	3.26384	2.43575	4.28546	0.358953
9037147	Open Sea	chr3:9178297-9178298	-0.236427	0.0123304	1.6152	4.00939	1.46661	2.87004	3.27513	2.23266	4.14118	1.66113	3.13079	3.53494
9198633	Open Sea	chr3:15107106-15107107	-0.343732	0.000920289	3.46376	1.61469	6.49724	4.47945	2.30917	4.47945	2.47411	4.4699	4.28847	4.28847
9319655	Open Sea	chr3:23713775-23713776	-0.220887	0.0495308	2.05961	2.21267	3.5581	1.39635	0.779356	4.1298	0.95417	3.10188	2.45757	2.98818
9561997	Open Sea	chr3:39543544-39543545	-0.336401	0.00970717	1.94866	1.88808	4.41836	3.36844	3.65916	2.30751	4.28115	3.0633	2.54674	3.22093
9562003	Open Sea	chr3:39543617-39543618	-0.307269	0.0485117	0.997636	1.26684	5.47811	4.1068	3.46399	3.0531	3.92911	4.75961	1.57844	4.88824
9633293	Open Sea	chr3:43731533-43731534	-0.287172	0.0188608	1.59075	2.75523	3.63001	5.61442	3.40876	3.91532	4.21082	3.81911	3.83652	2.33934
9655609	Open Sea	chr3:44902908-44902909	-0.228929	0.00183731	1.95701	3.07326	2.47507	1.66785	3.52926	2.45026	1.63171	1.64561	2.05339	2.82446
9758819	Open Sea	chr3:48885502-48885503	-0.25218	0.00182567	3.64036	1.67441	8.71342	5.63199	4.1109	7.20882	1.87403	5.8728	1.90484	4.35793
9758821	Open Sea	chr3:48885591-48885592	-0.23941	0.00925842	-0.0200355	2.85077	4.60244	3.29311	2.35083	2.56454	3.6742	2.23804	1.68298	0.538554
9797207	Open Sea	chr3:49967517-49967518	-0.213258	0.00308594	0.915549	1.81105	2.70655	2.51466	2.73779	2.51466	2.76495	1.86478	2.7563	2.2588
9994445	Shore	chr3:58570828-58570829	-0.212508	0.0405539	3.30471	0.203862	4.7428	1.56974	1.80026	2.95181	1.12835	2.762	3.3678	1.29731
10097853	Open Sea	chr3:65343009-65343010	-0.265685	0.0050422	3.06093	3.19739	5.92364	5.97688	3.57103	6.01103	5.74334	3.20582	1.29243	5.73873
10439271	Open Sea	chr3:89164151-89164152	-0.211985	0.0278444	1.63433	2.30378	3.12705	3.31932	2.56808	1.36342	1.81563	2.06978	4.34479	3.12705
10508759	Open Sea	chr3:98242193-98242194	-0.208655	0.0340933	1.45246	2.09694	1.50082	1.13053	1.81755	1.09406	0.0981846	1.64109	1.22029	3.00866
10554387	Open Sea	chr3:101443031-101443032	-0.20638	0.043093	1.94155	0.980235	0.81638	1.3225	2.27357	1.51009	1.78687	3.00499	2.66733	1.57111
10602415	Open Sea	chr3:105601367-105601368	-0.417012	0.000229971	2.83761	2.84395	4.12516	4.30455	2.85172	3.70743	3.81215	2.61722	3.82811	2.41102
10682633	Open Sea	chr3:111697537-111697538	-0.240934	0.0036194	1.68559	3.99288	4.0873	3.10198	1.387	3.52428	4.17385	2.81577	3.43448	2.58136
10687131	Open Sea	chr3:112012966-112012967	-0.283783	0.01842	1.28534	1.49434	3.98785	2.35646	2.0619	2.01982	4.26406	3.33352	3.36637	2.23243
10687133	Open Sea	chr3:112013002-112013003	-0.288015	0.0172353	1.55846	2.1277	3.16719	2.3534	2.45102	1.63453	2.07236	2.88662	3.59191	2.47551
10687135	Open Sea	chr3:112013063-112013064	-0.285796	0.00389653	0.952516	1.87398	3.72435	2.58956	1.63784	2.11896	2.39534	3.06552	2.09968	2.76386
10687137	Open Sea	chr3:112013079-112013080	-0.279548	0.0126842	0.177092	2.02835	4.36186	2.99329	1.8987	3.15393	3.67958	3.36631	2.03271	3.00319
10687139	Open Sea	chr3:112013130-112013131	-0.315416	0.00311823	2.14976	1.10631	4.09844	2.81626	2.23871	2.83116	3.03389	2.67572	3.64834	2.47727
10687141	Open Sea	chr3:112013162-112013163	-0.251843	0.00648801	1.64114	1.05728	2.7284	1.94545	1.74469	2.02575	2.18895	2.1934	3.02779	1.92355
10704459	Island4760	chr3:113160468-113160469	-0.408053	0.00812413	4.07269	2.30505	4.15922	2.30505	2.30505	5.22677	3.64417	3.44204	3.4007	3.30939
10704461	Island4760	chr3:113160479-113160480	-0.39967	0.00404497	4.588	2.76146	4.08215	2.31914	3.71541	5.72374	3.25424	3.31375	2.24264	2.51041
10704463	Island4760	chr3:113160490-113160491	-0.407437	0.00166725	4.0557	3.04177	3.98211	1.97274	4.21486	5.88076	3.8483	3.71004	3.11633	3.72979
10704465	Island4760	chr3:113160528-113160529	-0.335525	0.0115136	3.6955	2.51004	2.70403	1.45477	3.56203	5.63198	2.45616	2.46286	2.12207	2.98288
10704467	Island4760	chr3:113160531-113160532	-0.40298	0.00263933	5.31031	3.30687	3.95859	2.31378	5.45058	6.25799	3.55934	2.71888	2.86295	4.04269
10704469	Island4760	chr3:113160554-113160555	-0.371215	0.00546145	4.17025	2.2137	4.67518	0.820773	4.66302	6.0426	3.3079	3.73908	3.09232	4.16458
10704471	Island4760	chr3:113160585-113160586	-0.296349	0.00891386	3.04358	2.70165	3.34793	0.738515	3.75634	5.29653	2.72767	2.94494	2.47291	2.78994
10704473	Island4760	chr3:113160588-113160589	-0.227794	0.116578	2.98931	2.56227	2.91395	0.803848	3.7305	6.88345	2.87693	1.78245	2.01875	3.08215
10704475	Island4760	chr3:113160623-113160624	-0.156172	0.323992	2.18816	2.13435	2.09428	1.30572	3.66754	4.21676	1.30572	1.76062	0.349747	4.39426
10704477	Island4760	chr3:113160635-113160636	-0.130749	0.0369464	1.51589	2.3009	1.95746	1.14955	3.48824	3.47333	1.23166	2.65603	1.19207	1.25741
10704479	Island4760	chr3:113160637-113160638	-0.0735517	0.484591	0.310255	1.0619	2.35713	1.23333	2.69661	2.87542	-0.214941	2.04622	1.09999	1.39332
10704481	Island4760	chr3:113160640-113160641	-0.137893	0.133617	1.54479	0.795298	1.86121	0.940804	2.73978	3.68575	0.961969	1.74705	0.116272	2.32311
10714445	Open Sea	chr3:113667833-113667834	-0.216018	0.0212977	3.07123	1.13413	3.59334	2.40823	1.9479	1.40505	-0.177449	1.11539	3.14084	2.99795
10998247	Open Sea	chr3:129063245-129063246	-0.257692	0.0236112	1.50378	2.48608	4.12326	1.78443	2.8369	1.99493	3.65549	1.66749	3.98089	2.77499
11034019	Open Sea	chr3:130746084-130746085	-0.290777	0.00133793	3.77161	3.42139	3.06132	4.64914	3.09898	4.03577	4.57501	1.83444	3.1089	2.28286
11040183	Open Sea	chr3:131246045-131246046	-0.261157	0.0143602	1.97244	3.55338	7.14142	2.74526	4.62672	2.00299	6.62422	4.12924	4.40767	3.23187
11072987	Open Sea	chr3:133524358-133524359	-0.309344	0.0475826	2.59786	3.3585	0.713138	1.86513	2.8793	2.7118	5.0514	2.59786	3.78855	2.65198
11149593	Open Sea	chr3:138067902-138067903	-0.226185	0.0118907	1.88253	2.54656	6.80495	4.09414	2.7326	4.20367	3.98839	1.29891	3.32745	3.42328
11149599	Open Sea	chr3:138067933-138067934	-0.241453	0.00646165	3.53197	2.83648	4.95295	2.96957	3.50928	5.00989	5.35779	2.82938	3.96616	1.99991
11270529	Open Sea	chr3:145879568-145879569	-0.385982	0.00263933	3.01767	3.11654	5.83545	3.61089	2.33008	3.78536	2.62219	3.40633	2.47009	3.79627
11419113	Open Sea	chr3:156323893-156323894	-0.275265	0.0087684	1.08937	-0.602377	3.44392	2.00212	3.7928	2.73622	2.1286	2.65354	1.92308	3.83147
11419117	Open Sea	chr3:156323901-156323902	-0.261479	0.00999584	1.20376	0.0370144	6.28403	3.4034	3.58825	2.47589	1.96035	2.61526	2.98919	3.0047
11419119	Open Sea	chr3:156323952-156323953	-0.213578	0.0277274	-0.349011	0.325366	5.14749	2.96826	3.51307	2.62887	1.51544	2.25141	2.3894	4.84482
11446061	Open Sea	chr3:158288618-158288619	-0.217039	0.0127833	1.79424	3.51742	3.03734	4.14744	2.7614	1.90759	3.81585	2.64139	2.75189	3.50548
11463517	Open Sea	chr3:159559191-159559192	-0.210645	0.0469635	2.86234	1.0487	4.02516	2.38528	1.39141	3.38452	0.715585	1.21394	2.07143	2.73606
11586317	Open Sea	chr3:169683913-169683914	-0.215203	2.68809e-05	1.97287	2.07207	2.66192	2.55563	2.65938	2.22522	2.70899	2.48626	3.1172	2.34519
11586319	Open Sea	chr3:169683921-169683922	-0.226034	0.000999829	2.13787	2.13179	2.75192	2.52075	1.91275	2.19547	2.05548	1.63745	2.96629	1.51041
11586321	Open Sea	chr3:169683967-169683968	-0.276445	3.20003e-05	2.87293	2.52686	2.57114	2.35614	3.19503	2.69291	2.69413	2.53186	2.83427	2.52996
11586325	Open Sea	chr3:169683976-169683977	-0.253639	0.000116304	2.26768	2.10491	2.595	3.04368	3.08602	2.7741	2.527	2.15184	3.23188	2.12167
11586327	Open Sea	chr3:169684004-169684005	-0.311313	0.00419922	5.96736	2.37676	6.57041	3.65442	3.48145	3.51008	3.90325	2.77995	3.44676	4.27261
11586329	Open Sea	chr3:169684019-169684020	-0.29828	0.00121625	4.60761	2.66109	4.76299	3.56815	3.45785	2.48418	2.61975	2.85967	3.00031	3.59171
11586331	Open Sea	chr3:169684056-169684057	-0.262103	0.00123888	5.10938	3.02246	3.256	4.31709	4.12347	3.25799	4.57519	3.15536	2.40739	1.95722
11586333	Open Sea	chr3:169684118-169684119	-0.28506	0.000840479	6.46719	5.03645	6.8935	4.24708	5.37594	4.67265	3.44241	4.05665	4.7116	3.21087
11586335	Open Sea	chr3:169684124-169684125	-0.261774	0.000740237	4.67037	3.48274	3.78325	3.46685	3.22661	3.9107	2.82434	3.37967	3.69411	3.06478
11605581	Open Sea	chr3:170625559-170625560	-0.257283	0.00223132	2.14224	3.58026	3.01258	2.20226	5.24977	2.07325	5.30849	4.26745	4.83183	3.66084
11715633	Open Sea	chr3:178254213-178254214	-0.213843	0.021526	2.76288	1.12771	6.10137	5.98213	3.71673	4.19366	5.05213	4.25089	1.42343	4.67059
11725909	Open Sea	chr3:178978837-178978838	-0.218769	0.0263472	2.61937	1.86107	3.31352	0.692022	2.66094	0.839832	2.46724	0.656596	2.9814	0.545891
11808349	Open Sea	chr3:183543894-183543895	-0.261759	0.0137166	2.76887	2.28676	2.88258	0.106058	2.99772	3.99874	3.46422	3.00366	5.63857	2.4819
11808351	Open Sea	chr3:183543897-183543898	-0.229715	0.00546145	1.61969	3.7238	4.45833	0.93031	3.32656	4.42285	4.81032	3.47891	4.24048	1.98466
11850839	Open Sea	chr3:184972153-184972154	-0.206885	0.0135211	1.1426	2.05004	4.1912	3.27923	3.70839	6.10635	4.1912	2.90371	2.13926	3.55983
12342737	Open Sea	chr4:4577513-4577514	-0.225742	0.00188033	2.93692	1.94404	4.26335	2.91458	4.26335	1.17551	4.3704	3.42228	1.58722	2.89555
12517147	Open Sea	chr4:9692825-9692826	-0.29545	0.0099115	4.09217	1.11028	6.03193	2.5381	3.12163	3.45425	2.62152	5.51762	3.98584	2.69224
12517149	Open Sea	chr4:9692836-9692837	-0.316081	0.00334942	4.82403	3.59877	7.41639	1.75765	5.37414	3.76901	5.13304	6.6006	5.04866	4.40974
12638883	Open Sea	chr4:17551373-17551374	-0.27079	0.00899952	2.86888	4.07407	3.85577	4.04375	5.07177	2.16395	5.78928	3.00986	3.70197	1.89961
12638885	Open Sea	chr4:17551376-17551377	-0.255223	0.00422936	3.38889	4.62121	6.67508	5.57968	5.03199	4.80138	7.66094	4.11616	1.19809	2.56734
12638887	Open Sea	chr4:17551384-17551385	-0.297651	0.00246649	2.74308	6.25668	9.27715	6.50512	4.68007	3.14694	7.51798	3.97935	3.10345	2.15748
12638891	Open Sea	chr4:17551414-17551415	-0.302799	0.00307539	7.15149	5.148	6.27355	7.05774	5.81226	4.51175	7.36911	6.37838	1.41643	1.87915
12929877	Shore	chr4:38664354-38664355	-0.211532	0.0452992	1.39916	2.14587	1.88458	-0.273236	2.22187	1.08606	3.17212	0.768959	1.74058	2.50152
12946531	Open Sea	chr4:39449103-39449104	-0.281585	0.0477954	4.26645	2.41562	2.98511	1.58728	4.09932	0.698402	5.13446	2.43101	2.98511	3.2866
13064675	Open Sea	chr4:46726145-46726146	-0.362119	0.0488475	3.13987	2.30277	4.37104	1.77438	4.2783	3.95794	1.63326	2.83355	2.18749	2.7945
13081995	Open Sea	chr4:48018340-48018341	-0.218576	0.0300786	2.20321	1.15284	2.50331	3.20791	0.805578	1.78306	1.67225	0.440775	5.87949	2.82107
13117125	Open Sea	chr4:52918457-52918458	-0.258388	0.00201028	3.77555	7.66833	5.03379	6.67498	5.46822	6.40145	6.2423	3.6164	4.63673	0.824939
13117129	Open Sea	chr4:52918476-52918477	-0.304856	0.000573365	3.02977	6.88981	5.98782	6.81698	5.7256	6.60791	3.93611	3.93077	3.92088	4.0447
13117131	Open Sea	chr4:52918489-52918490	-0.302139	0.0107115	3.42115	8.39249	5.0246	4.68626	5.31683	6.88954	4.70041	3.47777	2.6571	1.38506
13140803	Open Sea	chr4:54459109-54459110	-0.221406	0.00215464	0	4.11918	6.81013	2.34019	2.50299	2.92495	3.44615	2.7681	5.78648	1.69956
13140805	Open Sea	chr4:54459114-54459115	-0.265387	0.000134519	1.11228	3.19602	4.65198	1.26692	3.28055	3.00257	2.24053	3.19928	4.11051	1.53597
13521127	Open Sea	chr4:83205712-83205713	-0.277262	0.0291739	3.49196	1.97247	2.43292	3.79454	4.27473	4.19798	2.69768	3.5676	3.87706	-0.508846
13521137	Open Sea	chr4:83205835-83205836	-0.245547	0.0262791	4.80972	2.96243	4.83334	3.71862	2.95529	3.93653	4.64642	5.90764	2.40691	2.10155
13622459	Open Sea	chr4:89377275-89377276	-0.244953	0.0016393	1.33626	1.15474	4.6808	2.15494	3.4986	2.51366	0.413276	3.1299	2.6863	3.09957
13622461	Open Sea	chr4:89377439-89377440	-0.298374	0.00365549	0.733922	2.08588	2.37113	3.20257	2.68508	2.44641	3.30265	3.59235	3.72606	3.0486
13738135	Open Sea	chr4:99064946-99064947	-0.288635	0.0146731	1.9619	3.46958	4.84265	4.1192	3.51958	1.9619	3.23698	4.59756	6.49246	1.39854
13751245	Open Sea	chr4:99851052-99851053	-0.271234	0.0439389	1.80983	2.70268	2.92943	3.89314	2.17358	3.29791	4.66345	0.826793	2.52631	2.38522
13805755	Open Sea	chr4:103998289-103998290	-0.275257	0.00696062	3.03844	1.1933	4.05324	2.96336	2.75107	2.64961	3.49019	2.47324	3.51048	3.60906
13805757	Open Sea	chr4:103998291-103998292	-0.246169	0.00384602	2.36266	2.21918	1.81879	2.59367	2.33153	2.63966	2.54768	1.91139	2.52282	2.01113
13805759	Open Sea	chr4:103998293-103998294	-0.259036	0.000477785	2.54032	2.15314	2.25433	2.54209	2.68966	2.66125	2.64806	2.4062	2.60438	2.40826
13805763	Open Sea	chr4:103998497-103998498	-0.236101	0.0168789	1.35371	2.81967	3.60904	3.74608	1.86024	1.71301	2.21604	2.33633	2.52223	1.2519
13875679	Open Sea	chr4:109684587-109684588	-0.210067	0.032626	1.84499	1.87051	3.27043	2.40376	1.14948	1.72611	1.86524	2.43846	2.32146	1.39266
14079163	Open Sea	chr4:124733321-124733322	-0.207459	0.0107115	0.402539	1.66505	1.5882	2.09634	1.90872	1.36003	1.18475	1.82761	2.13163	1.39059
14122737	Open Sea	chr4:128545193-128545194	-0.202043	0.0481001	2.17115	0.348937	3.2619	4.68405	2.02385	4.45169	1.55184	4.51107	1.05379	2.39405
14131205	Open Sea	chr4:128981503-128981504	-0.211059	0.00900929	2.80511	2.69884	1.58308	3.17456	3.35753	3.07491	2.70602	1.77291	1.80527	0.632615
14334177	Open Sea	chr4:144256842-144256843	-0.259723	0.00449916	1.18317	2.51064	2.99992	2.00064	2.38027	3.10889	1.72405	2.37451	2.72512	0.507075
14338037	Open Sea	chr4:144481032-144481033	-0.347181	0.00343226	3.84029	1.51485	4.71879	3.04964	2.97313	3.08613	3.79511	2.3062	4.42287	2.71079
14338039	Open Sea	chr4:144481050-144481051	-0.379852	0.00199507	4.18478	2.49063	4.12296	3.23369	3.88043	4.1592	3.43441	1.72079	3.88043	1.81087
14342515	Open Sea	chr4:144833067-144833068	-0.347772	0.0330759	1.88133	1.73479	2.93421	3.28275	4.07576	1.30703	3.42627	2.41016	3.85683	4.59493
14673499	Open Sea	chr4:168154767-168154768	-0.225378	0.01842	2.74266	2.06439	3.28079	0.521054	3.09282	3.13139	2.52935	2.81966	3.3205	2.00978
14696269	Open Sea	chr4:169799650-169799651	-0.208077	0.00444133	0.948742	2.71027	2.64258	3.68624	2.44339	1.02549	1.77383	1.65849	2.28356	3.11176
14696271	Open Sea	chr4:169799680-169799681	-0.242382	0.00269443	1.39224	2.54466	1.32895	2.91104	2.94686	1.07689	2.1293	1.80944	3.02272	1.61206
14696273	Open Sea	chr4:169799684-169799685	-0.213911	0.0127559	1.66092	1.71377	1.62771	2.46173	2.45068	0.771144	2.76007	0.645915	2.76007	0.830462
14696275	Open Sea	chr4:169799702-169799703	-0.222294	0.0370176	2.61826	1.70052	2.3526	2.52649	2.89359	0.691006	2.12775	1.5308	2.52649	1.4252
14711675	Open Sea	chr4:170695882-170695883	-0.388165	0.00579106	2.83312	3.52938	4.11736	3.20552	3.30537	3.41915	3.46068	2.7245	0.909028	3.01414
14711677	Open Sea	chr4:170695907-170695908	-0.346384	0.00579106	2.56995	3.65119	4.04922	3.11944	2.34438	4.32287	2.43135	3.76314	3.88574	5.308
14711741	Open Sea	chr4:170696318-170696319	-0.312698	0.0310222	1.45965	0.962934	6.35783	6.74877	2.3703	5.78818	3.00119	6.59239	5.18503	5.72632
14711743	Open Sea	chr4:170696330-170696331	-0.247674	0.030065	2.04503	2.7361	4.48254	5.25098	2.9969	4.2264	3.20181	3.78021	7.9588	2.46997
14711753	Open Sea	chr4:170696452-170696453	-0.24906	0.0493442	5.53015	2.18623	4.41719	2.09469	6.14391	4.59695	1.36127	3.90787	3.49115	3.77384
14711761	Open Sea	chr4:170696480-170696481	-0.301335	0.029729	3.0599	2.38944	2.57762	3.69057	3.92058	3.67933	3.51106	3.33182	4.45064	1.67666
14711763	Open Sea	chr4:170696527-170696528	-0.251358	0.0352479	1.01998	2.53861	3.03907	3.99122	3.00657	3.54554	2.20848	2.56	1.46957	2.62795
14711765	Open Sea	chr4:170696547-170696548	-0.320376	0.00825114	0.50916	2.36584	2.61798	3.58775	3.47138	3.40848	2.4739	2.76206	3.33838	3.56722
14930135	Open Sea	chr4:184642675-184642676	-0.262075	0.0127028	3.84119	4.60608	2.18991	2.17573	4.39393	2.84357	1.42611	5.75049	5.02755	4.08386
15339095	Open Sea	chr5:8457356-8457357	-0.33238	0.0269993	2.14749	2.98791	3.61151	3.66155	3.48283	1.16951	3.1442	3.8613	3.08071	5.41301
15442303	Open Sea	chr5:14581472-14581473	-0.248192	0.022375	1.07454	1.64119	2.47368	4.16969	3.63653	3.86422	3.4251	0.978601	1.37004	5.32794
15776471	Open Sea	chr5:37249925-37249926	-0.223437	0.0168693	2.28801	3.29129	8.87975	1.21596	2.80814	5.8278	2.80814	2.87607	4.46862	0.831643
15841721	Island6625	chr5:41509831-41509832	-0.198444	0.279914	0.769949	2.01999	2.30985	1.5553	0.61596	3.46785	1.09458	2.18886	2.50913	0.30798
15841723	Island6625	chr5:41509849-41509850	-0.303216	0.056495	3.11566	4.6757	3.28521	1.54874	1.31409	3.71482	3.62262	3.17571	4.45647	3.24657
15841725	Island6625	chr5:41509866-41509867	-0.216255	0.106842	2.06105	5.94873	4.86609	1.33382	2.64227	3.92033	3.72329	3.99076	3.03762	0.294914
15841727	Island6625	chr5:41509874-41509875	-0.190098	0.20377	1.22959	5.08248	5.25933	-0.974088	1.08716	3.15574	2.28352	4.51537	3.71143	0.386442
15841729	Island6625	chr5:41509882-41509883	-0.220582	0.094696	2.4664	5.29578	5.51191	1.25474	2.62152	5.51191	5.12579	1.86623	2.95761	1.68046
15841731	Island6625	chr5:41509895-41509896	-0.309518	0.0032085	3.73122	4.75465	3.69709	3.00066	2.38209	5.11173	2.58242	3.85905	2.6492	2.33935
15841733	Island6625	chr5:41509907-41509908	-0.270986	0.00971	3.97012	5.82687	5.44693	3.12852	2.79458	3.24048	4.92857	3.64575	3.75832	1.79953
15841735	Island6625	chr5:41509912-41509913	-0.241255	0.00689419	2.9828	6.21391	5.25145	1.85641	1.90576	6.76027	3.45764	5.0824	3.18904	5.35457
15841737	Island6625	chr5:41509931-41509932	-0.208761	0.612124	2.65944	6.06203	3.04393	1.15518	1.91486	5.21563	2.92187	4.14881	4.00518	0.813852
15841739	Island6625	chr5:41509934-41509935	-0.177065	0.128472	3.07565	7.49325	4.243	2.05953	2.24806	5.9289	-0.00657189	3.16597	2.83547	2.23024
15841741	Island6625	chr5:41509969-41509970	-0.180094	0.0241355	3.923	4.0458	7.39689	4.24292	4.25668	5.42566	1.0608	2.91607	8.11967	1.28608
15841743	Island6625	chr5:41509972-41509973	-0.173616	0.0129859	3.58049	3.79554	2.91099	3.36634	4.17868	3.6111	3.99643	2.36646	5.10578	2.74429
15841745	Island6625	chr5:41510003-41510004	-0.155096	0.0235159	2.22285	4.03495	2.29667	2.26224	5.49347	3.10088	3.97326	4.86079	3.72829	2.6474
15841747	Island6625	chr5:41510010-41510011	-0.147809	0.21337	0.334593	2.93156	1.59822	2.11466	1.5224	4.18989	3.35738	2.11946	1.58137	2.65966
15841749	Island6625	chr5:41510039-41510040	-0.156607	0.0659063	3.06174	4.8288	4.69466	4.53137	3.48314	5.92102	1.03054	3.521	1.69008	1.44646
15841751	Island6625	chr5:41510059-41510060	-0.162909	0.282858	3.20729	4.86574	7.6998	2.52457	1.39252	4.62768	2.50781	2.4884	3.22659	0.25028
15841753	Island6625	chr5:41510076-41510077	-0.259672	0.0104165	3.02715	1.61855	4.58333	1.69228	2.17084	3.98023	4.5527	3.00081	4.12389	3.98316
15841755	Island6625	chr5:41510116-41510117	-0.298466	0.00232187	1.97524	4.54666	6.51233	5.36049	2.84022	3.86408	6.11657	3.30979	5.93875	3.89711
15841757	Island6625	chr5:41510122-41510123	-0.231985	0.39874	2.24967	3.29573	4.75184	5.20255	3.35877	3.01664	4.61467	3.88152	3.00834	4.96942
15841759	Island6625	chr5:41510141-41510142	-0.164463	0.417662	2.60976	3.45227	6.62974	2.73606	0.853094	2.11619	3.43203	2.073	1.65552	0.194344
15841761	Island6625	chr5:41510143-41510144	-0.199299	0.00234527	3.55983	6.39993	7.3732	3.74732	2.2	5.48703	4.41109	5.64133	5.57086	7.79635
15841763	Island6625	chr5:41510156-41510157	-0.122024	0.0218121	4.97929	4.28365	9.21231	1.15329	4.55586	3.14534	5.84883	6.07243	4.65193	3.38926
15841765	Island6625	chr5:41510165-41510166	-0.154661	0.311181	2.42996	3.47713	6.74315	5.88581	4.97001	5.49794	4.69129	1.87524	1.86811	4.25772
15858659	Open Sea	chr5:42924139-42924140	-0.274673	0.00523809	1.59088	1.79423	0.946954	1.79423	1.64172	1.68331	1.79423	1.31262	1.79423	1.79423
15875677	Open Sea	chr5:43557866-43557867	-0.204296	0.00443549	0.945239	2.77622	5.29275	2.4424	5.07469	2.99545	5.38324	3.93159	3.08285	5.06242
16044039	Open Sea	chr5:58592636-58592637	-0.23017	0.0255022	2.06189	2.54226	2.96912	0.763663	2.04248	1.44647	1.7612	2.40184	1.26399	2.79501
16188001	Open Sea	chr5:68710758-68710759	-0.243256	0.00498661	3.32425	1.43358	4.50852	1.68155	2.86705	1.60716	1.68155	1.1515	3.09503	3.37773
16188173	Open Sea	chr5:68711558-68711559	-0.240106	0.0374471	3.51262	3.53875	4.46772	2.28463	2.89863	1.37781	5.26157	2.41829	2.5466	3.05513
16329719	Open Sea	chr5:76373821-76373822	-0.249447	0.00457744	1.80841	2.19932	2.53233	2.07468	1.46054	1.65626	2.07468	0.948158	3.34126	4.20484
16534507	Open Sea	chr5:90575422-90575423	-0.320676	0.00717166	4.14889	1.82582	2.69828	3.24165	1.49173	4.12607	3.83761	2.076	3.57156	1.46843
16534511	Open Sea	chr5:90575463-90575464	-0.383742	0.0129367	4.78316	2.58735	4.40393	4.11222	2.43486	5.97594	5.0707	5.07883	2.43486	2.43486
16596417	Open Sea	chr5:95295988-95295989	-0.207367	0.0112814	0.826838	0.739022	3.06166	2.64588	-0.35019	2.14897	1.62722	1.49523	2.33952	2.93693
16776011	Open Sea	chr5:110062328-110062329	-0.320137	0.0302753	3.23448	1.8942	3.4848	3.19957	2.64878	2.46563	3.02529	2.24478	3.50306	2.04636
16776013	Open Sea	chr5:110062333-110062334	-0.39983	0.00614267	3.44352	2.29054	4.19705	3.98107	2.84228	3.53315	3.1366	3.09988	3.68846	2.62389
16776015	Open Sea	chr5:110062343-110062344	-0.387929	0.00994041	3.27248	2.3295	4.29176	4.32103	2.89791	4.00526	3.15677	3.23861	3.49296	1.72681
16776017	Open Sea	chr5:110062372-110062373	-0.392564	0.00886667	2.85049	2.09936	4.25716	3.98089	3.71718	3.96735	3.37264	3.1143	3.92994	2.3365
16776019	Open Sea	chr5:110062384-110062385	-0.393511	0.00598299	2.71329	2.233	4.62656	4.24378	3.36195	4.0892	3.4119	3.32819	3.95425	2.33665
16776021	Open Sea	chr5:110062398-110062399	-0.264559	0.0464087	1.31461	1.95763	3.15666	3.28776	3.27856	3.67322	3.93885	2.86942	2.64398	1.952
16776023	Open Sea	chr5:110062411-110062412	-0.401615	0.0124069	2.20975	2.10628	4.24188	4.1884	3.42683	3.84848	3.12421	3.41968	3.55241	2.57832
16776025	Open Sea	chr5:110062417-110062418	-0.383541	0.0124367	2.6755	2.13351	3.89776	4.21161	3.79305	3.726	2.92599	3.28557	3.40168	2.63849
16776027	Open Sea	chr5:110062473-110062474	-0.344242	0.0185685	2.45037	2.4139	3.79443	3.56527	3.41964	3.82846	2.99737	3.48185	3.5508	1.63076
16776029	Open Sea	chr5:110062539-110062540	-0.352821	0.0303173	2.61164	2.10485	3.07848	3.08682	2.37221	3.40819	2.85941	2.94325	4.41047	1.89129
16776031	Open Sea	chr5:110062570-110062571	-0.374989	0.0315512	2.68971	1.62935	2.40206	2.939	2.35288	3.39775	3.01004	2.3111	3.15608	2.57194
16776033	Open Sea	chr5:110062608-110062609	-0.426383	0.0181894	3.57948	1.71153	3.31535	2.935	2.33576	3.45119	2.71511	2.43081	4.23057	3.04065
16776035	Open Sea	chr5:110062618-110062619	-0.426654	0.010035	3.4135	1.66483	3.44028	3.22731	2.5267	3.23541	2.66018	2.32118	3.64107	3.37334
16776037	Open Sea	chr5:110062682-110062683	-0.384746	0.0273597	2.54135	2.18992	3.52879	3.51322	2.35624	3.91722	2.71259	2.5553	4.44753	3.60253
16776041	Open Sea	chr5:110062729-110062730	-0.400019	0.0313619	2.60266	2.03077	3.19829	3.90465	2.51784	3.72984	2.50777	2.14712	3.46205	3.40161
16776043	Open Sea	chr5:110062780-110062781	-0.387583	0.0407821	1.98344	1.54836	2.9508	3.20895	2.99587	3.86246	2.43378	2.48777	3.16778	3.23165
16776045	Open Sea	chr5:110062837-110062838	-0.300192	0.0206001	2.9044	2.01695	2.82372	3.8322	2.50526	1.98333	3.94425	1.50832	2.15141	2.53559
16776047	Open Sea	chr5:110062857-110062858	-0.278075	0.0351713	1.47143	2.0065	2.76794	1.47143	0.749093	2.70787	2.79572	1.47143	1.99487	2.67533
16816421	Open Sea	chr5:112824511-112824512	-0.232799	0.0398709	0.839272	4.38435	4.46142	4.37093	4.01665	3.49808	1.7495	0.424183	5.37489	3.39961
16870867	Open Sea	chr5:116790868-116790869	-0.242051	0.0456157	2.09614	1.94154	3.79678	4.23409	1.98084	1.40727	3.43236	3.84631	1.61024	2.68767
16888949	Open Sea	chr5:118324567-118324568	-0.339355	0.000938124	4.34018	2.81664	3.89974	2.87204	2.85981	3.01885	4.96938	3.41204	4.91656	3.40057
16888951	Open Sea	chr5:118324606-118324607	-0.275937	0.0476278	2.59315	0.998713	2.52306	1.51384	4.34528	3.22988	4.91815	2.63775	2.63775	5.74698
16888955	Open Sea	chr5:118324619-118324620	-0.318882	0.0220352	5.86695	1.33211	2.60187	2.12571	3.42114	3.86552	3.10603	2.60187	5.81593	3.73624
16893793	Open Sea	chr5:118603643-118603644	-0.207227	0.030489	0.54129	2.16516	2.89852	3.78903	2.9075	2.46041	2.48994	2.04706	1.75919	-0.36086
17165461	Open Sea	chr5:135467867-135467868	-0.209826	0.0258955	1.95754	0.244126	2.90622	2.53899	1.47133	1.49484	1.43424	1.89525	2.15136	3.39852
17190461	Open Sea	chr5:137224213-137224214	-0.304935	0.00258464	0.572777	2.40514	3.64	2.98625	3.53104	0.98056	2.44146	2.29111	3.74422	2.94085
17190463	Open Sea	chr5:137224247-137224248	-0.268949	0.0099713	1.28811	2.02389	5.47024	1.58907	2.6966	0.616365	1.5749	1.86959	5.12354	3.19841
17190465	Open Sea	chr5:137224284-137224285	-0.333408	0.000340531	2.42178	2.19932	3.29395	2.67905	3.17511	1.99408	2.38863	2.774	3.21076	4.39423
17190483	Open Sea	chr5:137224842-137224843	-0.229907	0.00263933	2.30617	5.45095	5.99006	3.64612	6.06291	3.29453	2.45799	4.76482	4.19304	5.76543
17190485	Open Sea	chr5:137224869-137224870	-0.312442	0.00210494	2.34248	3.36165	2.19455	3.02112	6.43271	2.05506	6.30691	5.21669	4.0139	4.22868
17822561	Open Sea	chr5:172111379-172111380	-0.326891	0.0206011	3.92836	2.92346	1.17004	2.01331	2.53522	2.92346	2.97748	3.15037	2.31254	2.85399
17822563	Open Sea	chr5:172111390-172111391	-0.336161	0.028862	4.05513	2.99066	1.01378	1.82843	2.91463	2.55064	3.07756	3.46649	2.47597	2.28101
17837307	Open Sea	chr5:172572282-172572283	-0.256948	0.0104644	2.78624	1.92525	2.99401	2.48757	1.25732	0.968247	1.45642	2.02164	3.29581	3.12292
17960663	Open Sea	chr5:176981888-176981889	-0.205366	0.0155068	5.11935	2.4459	3.33814	3.29706	3.84053	2.23052	3.68188	3.17884	5.01553	2.27752
18097795	Open Sea	chr5:180643772-180643773	-0.316512	0.0322687	1.2875	3.45829	4.41343	5.17755	3.25065	2.66233	2.15582	2.77604	4.56038	3.45829
18212513	Open Sea	chr6:3849162-3849163	-0.272072	2.68924e-05	4.7642	5.06839	4.49323	4.11387	3.74408	2.64078	4.36587	4.24473	3.60174	4.3434
18212515	Open Sea	chr6:3849177-3849178	-0.244714	0.00429769	4.0043	1.97542	3.00043	1.60796	2.83898	1.26906	3.23251	3.31405	4.05532	3.83591
18212517	Open Sea	chr6:3849182-3849183	-0.255047	0.00714523	3.70543	2.06439	3.75965	1.50627	2.96434	2.09802	1.95408	3.37929	3.83662	2.96434
18212519	Open Sea	chr6:3849190-3849191	-0.302257	0.000291179	3.9694	2.8965	4.11131	3.73739	2.92898	2.66147	3.87117	3.62625	3.80619	3.63911
18362293	Open Sea	chr6:10883834-10883835	-0.31775	0.00263933	8.14785	2.27922	3.42361	6.80834	3.02596	3.53296	5.24616	5.50975	3.53296	8.28374
18362297	Open Sea	chr6:10883866-10883867	-0.249026	0.0365867	6.38704	2.16097	2.45023	2.86677	3.49158	6.82864	6.02987	3.33649	1.63668	5.65439
18362299	Open Sea	chr6:10883890-10883891	-0.293299	0.0247486	5.39717	3.12056	2.19133	7.43724	0.976999	5.59401	6.46578	3.05958	3.22547	6.89322
18362301	Open Sea	chr6:10883895-10883896	-0.256984	0.0167968	8.55529	4.22432	3.70929	4.49248	3.28904	9.93778	8.76239	2.06427	1.34013	12.459
18362427	Open Sea	chr6:10886394-10886395	-0.238622	0.0088127	2.5397	3.39542	2.56258	1.301	1.35741	3.24378	3.95325	2.448	3.35787	3.43055
18453979	Open Sea	chr6:15244776-15244777	-0.211892	0.0035016	2.9541	2.36577	5.65349	3.98281	3.67606	4.33216	5.647	4.07617	3.95715	3.04597
18453981	Open Sea	chr6:15244783-15244784	-0.215708	0.0134695	2.22682	2.11009	4.35203	1.92022	2.76534	2.23161	3.66977	2.66775	2.42085	2.167
18634361	Open Sea	chr6:24774877-24774878	-0.265037	0.00845796	2.21765	3.43593	3.69276	3.08298	1.71772	4.32569	3.0935	2.56914	5.13714	2.83667
18669715	Open Sea	chr6:26522599-26522600	-0.457356	5.69962e-05	4.90359	4.08895	3.92197	4.49014	4.62961	4.30037	3.30125	4.25617	5.46865	4.16397
18669717	Open Sea	chr6:26522630-26522631	-0.372786	0.000585373	6.71973	5.47573	10.994	8.16611	8.31475	7.38616	3.41254	7.32278	5.81265	4.45012
18669719	Open Sea	chr6:26522639-26522640	-0.382627	0.000184193	8.01206	5.97812	8.38065	6.30695	7.42196	6.71397	6.52679	5.87407	3.85254	4.90423
18669721	Open Sea	chr6:26522679-26522680	-0.307733	0.000195647	4.94643	2.74603	4.92259	4.40334	4.03626	4.27155	3.11401	4.17572	5.16092	4.95575
18669725	Open Sea	chr6:26522791-26522792	-0.215413	0.00349022	2.49248	2.55584	2.43817	3.52246	2.82878	3.03969	2.5305	1.95108	3.24859	1.60724
18671435	Open Sea	chr6:26569333-26569334	-0.328997	0.0146896	5.62467	4.62406	3.2899	4.37312	3.71441	3.35398	5.58721	4.2602	0.742881	5.53371
18671437	Open Sea	chr6:26569335-26569336	-0.340542	0.0222196	4.32692	4.45356	5.8044	3.69371	3.08093	4.05213	6.40745	4.96012	2.42729	3.69371
18689075	Open Sea	chr6:27253191-27253192	-0.361797	0.00130987	4.54858	3.16378	5.88845	4.9568	3.54878	4.46167	4.44793	5.2481	2.36296	0.98507
18689327	Open Sea	chr6:27259275-27259276	-0.33687	0.0183351	4.69306	3.69215	2.75542	1.72846	3.19189	4.73151	4.81192	4.03933	3.03278	2.56315
18689331	Open Sea	chr6:27259315-27259316	-0.378391	0.0124954	3.09912	2.51901	4.1931	3.35158	1.91476	2.60356	5.37123	3.99391	2.32233	3.17125
18689377	Open Sea	chr6:27261333-27261334	-0.247868	0.0334216	3.5489	2.14376	5.71291	3.28033	2.68937	3.2747	3.8891	4.30671	2.18813	2.49368
18689383	Open Sea	chr6:27261479-27261480	-0.256585	0.038298	1.66794	2.20391	3.87118	3.37217	4.53227	2.80187	5.9702	4.7993	2.25561	2.9286
18694613	Shelf	chr6:27482816-27482817	-0.332096	0.00145966	2.25184	3.44599	2.88872	1.53534	3.62385	3.9141	3.57459	3.66171	3.61318	4.20591
18694617	Island7814	chr6:27482889-27482890	-0.396511	0.00117038	4.11862	3.31219	6.01553	3.76249	5.56433	6.14532	7.41986	3.62985	5.17911	3.80322
18694619	Island7814	chr6:27482901-27482902	-0.258302	0.249203	2.74631	1.5157	3.3243	3.12393	1.98611	3.09914	3.76029	2.73842	2.12588	4.21483
18694621	Island7814	chr6:27482911-27482912	-0.246915	0.02496	1.92803	1.31287	2.77914	2.20557	1.92803	1.64433	3.2835	2.62716	2.73004	2.12022
18694623	Island7814	chr6:27482917-27482918	-0.271542	0.0441093	3.53575	1.80945	4.57805	2.05204	3.21037	1.74004	4.25584	3.73496	1.97395	3.86112
18694625	Island7814	chr6:27482923-27482924	-0.344382	0.0238905	3.70786	1.95252	2.79767	4.34682	3.36828	3.2383	6.17106	5.04777	1.63656	5.0453
18694627	Island7814	chr6:27482932-27482933	-0.323998	0.0306417	2.97001	2.86847	4.29001	2.2058	3.84239	2.83396	5.54402	3.62589	2.38831	3.93644
18694629	Island7814	chr6:27482950-27482951	-0.403922	0.000258064	5.61692	4.01782	6.85684	4.59443	5.99219	4.50959	7.57327	5.15338	4.08539	8.01318
18694631	Island7814	chr6:27482992-27482993	-0.34071	0.00440961	4.79636	2.85052	5.96467	3.75087	3.79258	4.01195	6.32315	4.81405	2.57236	2.61786
18694633	Island7814	chr6:27483011-27483012	-0.398333	0.00307539	6.04732	3.67035	4.44152	4.31203	5.31528	5.10191	6.68049	5.6401	2.13084	5.06159
18694635	Island7814	chr6:27483027-27483028	-0.3579	0.00445311	5.1497	4.3366	5.07904	4.29223	4.94707	4.23079	8.01328	6.08365	5.16011	4.52707
18694637	Island7814	chr6:27483033-27483034	-0.40914	0.00115796	5.79727	4.57958	3.72598	4.70454	5.90199	4.05382	7.55481	5.82546	4.18505	5.68979
18694639	Island7814	chr6:27483044-27483045	-0.394841	0.00357042	5.4072	2.6233	4.66082	6.30286	5.63973	4.59877	7.58249	5.42732	4.84397	5.66089
18694641	Island7814	chr6:27483046-27483047	-0.410037	0.00418236	4.66816	2.95517	5.47749	4.23588	4.22198	4.43247	7.22984	5.65666	5.29257	4.46231
18694643	Island7814	chr6:27483049-27483050	-0.397601	0.00216486	5.35533	3.54561	3.83248	4.9406	5.21096	3.50537	6.399	5.70693	3.611	4.98419
18694645	Island7814	chr6:27483065-27483066	-0.357612	0.00165918	4.46949	3.89669	5.66716	3.16478	6.08181	5.63518	6.73105	7.90627	4.63453	5.77874
18694647	Island7814	chr6:27483069-27483070	-0.371577	0.00281567	5.00264	3.201	3.79184	3.68276	4.9735	3.93167	6.04774	6.61709	4.58095	5.9683
18694649	Island7814	chr6:27483086-27483087	-0.34925	0.00556984	4.75416	3.16854	5.7818	3.76637	4.93967	4.21879	5.83456	5.80283	3.0143	5.31751
18694651	Island7814	chr6:27483088-27483089	-0.355512	0.0018733	4.11911	2.35559	3.29206	3.23575	4.38182	3.96492	4.69318	4.03178	3.19404	4.4263
18694655	Open Sea	chr6:27483142-27483143	-0.359167	0.0141416	4.85679	3.15862	3.25171	1.96354	4.67428	3.52921	6.34294	4.07627	3.04881	5.00782
18694657	Open Sea	chr6:27483144-27483145	-0.38514	0.00533146	4.7573	2.52617	3.83476	4.77947	5.86588	4.8511	6.86475	6.927	3.53786	8.03492
18696347	Open Sea	chr6:27529827-27529828	-0.352647	0.0300352	2.42277	1.22978	3.67946	2.05936	2.84517	3.66789	3.61291	3.56233	1.62581	2.8542
18696349	Open Sea	chr6:27529871-27529872	-0.361912	0.00211413	3.22753	3.5527	5.04695	2.35654	3.59718	3.72155	4.931	4.57424	4.6538	2.00164
18696353	Open Sea	chr6:27529973-27529974	-0.317085	0.00825265	7.00523	2.95624	5.02005	3.45083	4.87639	7.41135	6.36672	4.51494	5.88378	4.31852
18696355	Open Sea	chr6:27529985-27529986	-0.369845	0.000636763	7.94311	2.13498	6.45756	4.0773	2.73142	6.21762	7.89629	5.3525	6.04472	4.10668
18696359	Open Sea	chr6:27530032-27530033	-0.235614	0.00031668	2.85812	2.27313	2.44131	2.24567	2.24567	2.81482	2.76739	2.32719	2.05785	2.16741
18696361	Open Sea	chr6:27530048-27530049	-0.293617	0.0420997	2.79982	1.59829	2.76076	2.61429	1.92277	0.597017	2.6424	1.75709	1.1984	0.807811
18700631	Open Sea	chr6:27648301-27648302	-0.340631	0.0010714	1.21396	5.40658	3.15631	5.25529	1.56852	2.16996	3.73901	4.39085	4.91068	4.27315
18700639	Open Sea	chr6:27648341-27648342	-0.231345	0.0127484	2.10859	3.28003	5.63478	6.67044	2.39353	4.22079	5.11731	3.32103	4.95241	7.38006
18700641	Open Sea	chr6:27648346-27648347	-0.269153	0.00891656	2.62916	3.22827	5.21256	5.21256	2.03712	2.02852	2.92327	4.32889	3.79012	3.01042
18700659	Open Sea	chr6:27648445-27648446	-0.390506	0.000141542	1.67055	5.14368	4.18922	4.67325	2.2742	3.0909	2.88014	3.29507	2.24017	5.30079
18702679	Open Sea	chr6:27706181-27706182	-0.460537	0.00217022	2.4373	5.57527	4.94161	6.32739	2.21954	4.39719	6.35709	5.12569	5.95943	3.58057
18702681	Open Sea	chr6:27706186-27706187	-0.420774	0.03573	2.52426	5.87505	5.04282	6.93406	3.15512	2.46658	6.61966	4.99183	6.97579	1.65554
18702683	Open Sea	chr6:27706198-27706199	-0.386428	0.0057712	2.2232	4.88613	5.33284	6.93232	2.49833	4.9231	6.32792	3.27533	5.01472	3.43047
18702685	Open Sea	chr6:27706214-27706215	-0.423178	0.00243051	1.87647	5.31187	4.08997	5.86503	2.00922	3.61811	5.01992	3.41421	5.71806	3.87299
18702687	Open Sea	chr6:27706221-27706222	-0.465882	0.00311684	2.0954	5.58774	4.23843	6.14334	1.93926	3.87608	4.95277	3.7906	5.73958	4.90948
18702691	Open Sea	chr6:27706246-27706247	-0.454413	0.00051783	1.75974	5.89308	4.14562	6.52111	2.77523	4.17426	4.85463	4.06684	5.83937	5.36107
18702693	Open Sea	chr6:27706251-27706252	-0.450271	0.00241302	1.00453	5.30823	4.36753	6.36652	2.94081	4.30985	5.43093	3.75608	5.70509	4.21467
18702695	Open Sea	chr6:27706262-27706263	-0.438664	0.00907379	2.53985	5.32521	3.88463	5.0946	2.88249	4.14143	3.6341	3.33999	5.60706	3.84549
18702697	Open Sea	chr6:27706275-27706276	-0.483003	0.00134844	2.18786	5.36646	3.79601	5.84806	2.59397	4.33445	4.88485	3.22414	6.30134	4.49957
18707089	Open Sea	chr6:27831956-27831957	-0.25187	0.0243002	0.39646	2.7893	3.4113	3.30491	1.83354	3.63592	3.53765	2.92728	1.0706	3.4113
18707095	Open Sea	chr6:27831977-27831978	-0.262725	0.0472664	1.25624	1.816	2.30445	2.20794	2.73054	2.7387	3.64507	2.30985	0.863363	2.30445
18713047	Open Sea	chr6:28129241-28129242	-0.250358	0.00957269	0.455475	3.90793	2.93033	3.15329	3.59921	4.06699	2.54015	2.49529	1.49188	0.467154
18719433	Open Sea	chr6:28459184-28459185	-0.315803	0.0489703	2.34973	2.73142	2.07061	1.92554	1.64245	1.61815	2.60056	2.32034	2.82464	1.87943
18719445	Open Sea	chr6:28459335-28459336	-0.308744	0.042019	2.0704	2.43203	3.11582	1.29024	2.11285	2.90361	3.83204	3.31283	3.17211	1.06443
18943777	Open Sea	chr6:36391666-36391667	-0.411	0.00280083	3.26513	3.9209	3.39231	3.39231	2.67724	3.12965	3.11771	2.45258	3.0471	2.29393
18943779	Open Sea	chr6:36391668-36391669	-0.348523	0.00983349	3.15534	3.34864	3.61285	2.85797	3.15028	2.82867	2.20373	2.13487	3.97951	1.60898
18943781	Open Sea	chr6:36391680-36391681	-0.311896	0.013053	4.5798	4.44265	3.55122	1.15031	4.26872	3.41667	4.08773	1.65694	3.87122	0.834486
18998981	Open Sea	chr6:38608348-38608349	-0.247623	0.00706746	2.43144	2.23223	5.10225	3.79125	1.76042	2.53804	3.03467	4.33691	4.36089	0.728892
19103811	Island8144	chr6:43214555-43214556	-0.405187	0.000737808	3.30056	3.35698	3.73397	3.91821	3.20888	2.13925	3.97901	2.69546	3.85065	2.86912
19103813	Island8144	chr6:43214580-43214581	-0.164484	0.266501	2.38974	2.46287	2.64683	3.30385	5.4063	2.88336	6.10711	0.8456	5.4063	1.2014
19103815	Island8144	chr6:43214590-43214591	-0.330747	0.0377632	1.89997	2.75248	2.52682	1.25413	3.61025	3.18478	2.99293	3.04582	1.50529	2.08693
19106245	Open Sea	chr6:43276814-43276815	-0.246854	0.014148	2.19275	1.43087	5.4179	4.60799	4.71072	3.37821	4.84903	3.26715	1.14277	4.71072
19137537	Open Sea	chr6:44354641-44354642	-0.262909	0.0143972	1.68042	2.47365	2.29953	3.21296	2.17571	2.7661	2.01812	2.17571	2.49503	1.88679
19137539	Open Sea	chr6:44354646-44354647	-0.218076	0.000251782	2.00496	2.75963	3.53997	2.77699	2.52553	3.63321	2.29949	2.7513	4.10725	3.36861
19211165	Open Sea	chr6:49681294-49681295	-0.212586	0.00384805	2.4078	1.36659	2.4078	2.4078	2.4078	1.62158	2.4078	2.17289	2.4078	1.84126
19211167	Open Sea	chr6:49681299-49681300	-0.209474	0.0496748	1.43117	1.48004	1.52658	0	2.36621	1.46898	1.97762	1.2976	1.8319	2.90051
19223647	Shelf	chr6:50783555-50783556	-0.219803	0.00292114	2.36372	2.74992	4.40425	3.50485	4.62717	3.10509	3.57777	1.39248	5.87296	4.19003
19265119	Open Sea	chr6:53413260-53413261	-0.289635	0.0218945	4.38715	3.39931	4.0908	3.91732	3.37956	2.12553	3.80343	2.01975	4.88106	2.6477
19265121	Open Sea	chr6:53413266-53413267	-0.262229	0.0312979	5.08697	2.26055	3.20999	3.61688	4.23107	2.44835	3.05885	2.31481	5.18836	3.61688
19265125	Open Sea	chr6:53413349-53413350	-0.239285	0.0121371	2.37199	2.57718	2.84958	2.25497	1.87048	2.35208	1.98583	0.343838	3.00258	1.29375
19453299	Open Sea	chr6:72130784-72130785	-0.3099	0.0245222	3.32428	1.53465	2.42947	4.08653	3.87821	4.38768	1.20656	3.22202	5.08905	3.17515
19453301	Open Sea	chr6:72130799-72130800	-0.311982	0.0352614	3.85031	2.18253	3.85031	2.49138	4.25131	5.97248	1.44129	2.04035	4.07068	3.85031
19453307	Open Sea	chr6:72130876-72130877	-0.338728	0.022338	3.1321	1.65678	1.91713	2.30765	3.41972	3.37509	1.14186	2.23408	2.8227	1.9692
19489219	Open Sea	chr6:74364533-74364534	-0.281093	0.0155288	3.8964	2.12531	4.11779	5.56331	0.354218	2.6395	2.88435	3.77426	0.354218	4.25062
19489221	Open Sea	chr6:74364622-74364623	-0.271389	0.0155288	4.38569	2.04246	0.776303	4.7124	1.75562	4.91884	3.10218	2.41854	2.11816	5.63253
19489223	Open Sea	chr6:74364667-74364668	-0.23643	0.012185	3.33104	2.96194	2.64592	5.74854	2.51147	6.56409	4.68246	2.92408	2.57258	4.52818
19489225	Open Sea	chr6:74364700-74364701	-0.282859	0.0298631	4.24475	1.94593	1.91006	4.84063	2.40998	5.38754	3.71501	2.46654	3.05397	6.14559
19548791	Open Sea	chr6:79339179-79339180	-0.380299	0.0429883	2.7935	1.26909	4.95802	3.89042	5.1296	5.5772	7.63893	4.49516	5.04381	4.10013
19548797	Open Sea	chr6:79339220-79339221	-0.345545	0.00735682	3.43861	2.54632	3.50195	3.91488	6.90862	5.58785	8.1474	3.45431	3.59975	5.78597
19591991	Open Sea	chr6:82957976-82957977	-0.240014	0.024953	5.20864	1.73704	1.36655	1.36655	4.26527	3.52773	-0.155093	1.92228	-0.300641	5.49891
19635883	Open Sea	chr6:86302718-86302719	-0.228564	0.0476437	3.11603	2.68095	2.78972	1.69213	4.15255	0.647425	2.54499	3.11603	1.94132	1.84918
19635885	Open Sea	chr6:86302726-86302727	-0.2032	0.0496064	3.15264	2.73229	1.70768	1.54434	3.8252	1.72859	1.95163	2.65532	2.54385	1.29424
19654377	Open Sea	chr6:87832666-87832667	-0.293734	0.0107115	3.47549	1.63269	3.88408	1.22209	3.47549	4.2624	2.91638	2.70088	3.41444	1.40987
19926525	Open Sea	chr6:107781506-107781507	-0.238568	0.00189866	2.53172	3.41696	2.76265	3.54782	2.17795	3.30044	2.12944	1.4324	2.07989	3.88433
20021859	Island8448	chr6:112688078-112688079	-0.260754	0.260871	1.70576	2.21199	2.02216	2.25945	1.26282	2.31673	1.70576	2.29132	1.61537	2.97133
20021861	Island8448	chr6:112688092-112688093	-0.218902	0.195443	2.06996	1.70931	1.69994	2.41258	0.590491	1.81871	1.4228	2.14667	2.09443	2.41258
20021863	Island8448	chr6:112688097-112688098	-0.135278	0.132709	1.66394	1.17092	1.66394	1.66394	0.722722	1.17092	0.574109	1.51604	1.28048	1.66394
20021865	Island8448	chr6:112688100-112688101	-0.274436	0.181841	2.88537	3.64269	4.45611	3.72141	3.16203	2.25201	0.470367	3.83212	3.69692	4.45611
20021867	Island8448	chr6:112688113-112688114	-0.214813	0.221275	2.66889	2.39965	3.00065	2.69116	0.190369	3.20047	2.27692	2.35056	2.10697	3.38156
20021869	Island8448	chr6:112688133-112688134	-0.16308	0.124846	1.77045	2.07396	2.83272	2.46822	1.54177	2.45139	1.06227	1.95996	2.83272	2.83272
20021871	Island8448	chr6:112688137-112688138	-0.282245	0.196292	3.27567	2.4318	3.46905	3.85583	2.11535	2.92064	2.36399	2.82625	2.11535	3.85583
20021873	Island8448	chr6:112688145-112688146	-0.365768	0.000290871	3.88025	3.82986	4.4859	4.30859	3.47336	3.76147	2.25688	4.96514	4.38838	4.51376
20021875	Island8448	chr6:112688185-112688186	-0.445531	0.00232187	4.6045	2.879	2.91618	4.05634	3.53809	4.05634	1.81674	3.91583	4.05634	3.92678
20021877	Island8448	chr6:112688190-112688191	-0.44233	0.137	3.83837	3.45383	4.58263	3.60086	3.81739	4.5536	3.12057	3.60448	5.45342	3.65379
20021897	Island8448	chr6:112688318-112688319	-0.456645	0.00219721	3.52456	3.90051	5.13578	4.37045	2.85029	4.97986	3.74145	3.49288	3.3587	2.96063
20021899	Island8448	chr6:112688330-112688331	-0.427178	0.00862225	3.97237	5.4842	5.72291	4.63546	3.07376	5.19201	4.23342	4.89951	1.14062	3.44721
20021901	Island8448	chr6:112688333-112688334	-0.47198	0.00664018	3.57138	4.75552	4.58467	5.37535	3.56082	4.78647	3.30436	4.24499	2.15574	3.49538
20021915	Island8448	chr6:112688381-112688382	-0.415791	0.102666	2.61657	5.63493	4.8489	5.30968	2.4908	5.13849	2.8965	3.88007	3.53885	3.91995
20021917	Island8448	chr6:112688396-112688397	-0.451268	0.00202902	2.68201	5.10967	3.87742	4.68608	2.48578	4.02445	3.87742	3.52011	4.14698	4.14698
20021919	Island8448	chr6:112688412-112688413	-0.446972	0.00163188	4.48407	5.49279	5.22734	4.77811	2.69534	5.96094	3.25542	4.54029	3.52845	4.41056
20021921	Island8448	chr6:112688414-112688415	-0.453325	0.248405	4.1658	4.9573	3.6659	5.66548	2.22026	5.01177	3.46224	3.31055	3.96584	3.70435
20021923	Island8448	chr6:112688417-112688418	-0.494821	0.104124	3.01498	4.88503	4.41752	5.35254	2.48253	5.01434	3.763	3.6695	3.08177	4.63002
20021925	Island8448	chr6:112688422-112688423	-0.468659	0.0287478	1.90124	4.09712	5.53423	5.33131	2.45509	3.92008	3.44967	3.38247	3.38247	3.33563
20021935	Island8448	chr6:112688515-112688516	-0.432705	0.0384148	2.82928	3.23633	1.69677	3.63462	2.64808	4.20716	1.29511	3.25208	2.75378	2.22528
20021937	Island8448	chr6:112688518-112688519	-0.499546	0.103003	4.20665	3.19566	3.19566	4.13176	1.96	3.64269	1.51067	3.39389	3.19566	4.88064
20021939	Island8448	chr6:112688525-112688526	-0.493556	0.00458529	3.91078	3.649	2.47741	4.2175	2.13614	3.93732	2.30046	3.45068	2.71872	3.97352
20021943	Island8448	chr6:112688564-112688565	-0.374815	0.217178	4.20619	3.98031	-0.798098	3.62534	3.60383	2.72765	2.46363	3.17356	2.5798	2.95512
20021945	Island8448	chr6:112688571-112688572	-0.425414	0.00147822	4.70539	3.91213	1.00103	4.44281	4.16032	4.20804	2.63918	3.45552	4.19074	3.71568
20021947	Island8448	chr6:112688607-112688608	-0.454676	0.0127729	4.32858	4.42669	2.78413	3.72587	3.53144	5.5888	3.57519	3.89807	5.14401	4.93129
20021949	Island8448	chr6:112688612-112688613	-0.471174	0.000184193	5.4458	6.16561	3.35728	5.28038	3.79799	6.41093	3.85038	5.71066	4.86828	5.64668
20021951	Island8448	chr6:112688616-112688617	-0.448387	0.000134519	4.86141	5.80099	4.0471	3.91298	4.91195	5.74639	2.64399	4.73754	4.27511	4.86141
20021953	Island8448	chr6:112688619-112688620	-0.47252	0.0055437	3.20199	4.60035	2.88757	3.71987	2.88757	5.07667	3.75828	4.16298	3.45353	3.89822
20021955	Island8448	chr6:112688622-112688623	-0.496069	0.0955083	6.14775	4.46058	3.09478	3.45396	3.93698	5.96457	3.56447	4.59977	3.70538	4.18513
20021957	Island8448	chr6:112688629-112688630	-0.43419	0.0141636	2.16943	4.94603	3.60607	4.27521	2.29055	3.91725	1.98102	3.72735	5.23113	3.21916
20021959	Island8448	chr6:112688631-112688632	-0.430561	0.0155567	2.88577	4.24387	4.12818	4.67771	2.87211	4.67771	2.26823	3.52869	3.18613	2.94458
20021961	Island8448	chr6:112688636-112688637	-0.481287	0.000195604	3.5886	3.76809	4.0137	4.23042	3.52247	4.69306	3.41827	3.57793	3.52247	3.91923
20021963	Island8448	chr6:112688655-112688656	-0.461773	0.00428748	5.15947	4.52246	4.0646	2.83193	4.27272	4.75138	4.13398	4.14939	4.39164	2.83193
20021965	Island8448	chr6:112688658-112688659	-0.529489	0.00256307	3.83942	4.85431	5.54538	4.75981	5.26383	4.98032	3.73744	4.01252	3.01147	4.75981
20021967	Island8448	chr6:112688660-112688661	-0.423146	0.463396	3.39239	4.28923	4.52319	2.60953	3.33854	3.45191	3.76932	4.77448	4.00128	2.60953
20021969	Island8448	chr6:112688667-112688668	-0.508532	0.337558	4.00358	4.64556	4.24203	5.40778	3.90896	5.50493	3.53165	4.69538	3.80488	3.80488
20021971	Island8448	chr6:112688676-112688677	-0.439924	0.149451	4.64313	3.88049	3.29385	4.64313	3.44717	4.37736	3.47375	3.63117	3.84583	1.71968
20021973	Island8448	chr6:112688687-112688688	-0.497267	0.436176	2.62601	3.9015	3.99962	4.1566	2.99044	4.69869	3.13621	3.92754	3.08983	3.26376
20021975	Island8448	chr6:112688700-112688701	-0.466002	0.176217	2.8005	2.8005	3.416	3.01593	3.55449	3.87762	3.01593	2.8005	3.2901	3.23135
20021977	Island8448	chr6:112688704-112688705	-0.445053	0.0196782	3.97562	3.48787	3.41819	3.00012	2.33267	3.97562	2.6301	2.97937	3.97562	3.97562
20021991	Open Sea	chr6:112688914-112688915	-0.281335	0.00390711	2.47043	2.20805	2.3979	2.89879	1.79386	1.80826	2.49734	2.10443	2.32125	1.17088
20021993	Open Sea	chr6:112688930-112688931	-0.206684	0.0137029	1.57914	2.54833	1.92499	2.76144	1.51557	1.15065	2.71756	1.74334	2.29899	1.75612
20073159	Open Sea	chr6:116886155-116886156	-0.398889	0.0410805	4.50514	1.64204	3.00887	2.05669	5.77017	2.69485	5.48452	3.71814	4.8292	0.888118
20073163	Open Sea	chr6:116886173-116886174	-0.432228	0.00566969	3.28338	2.21457	4.49845	3.46445	6.24316	2.18403	7.00283	5.20724	7.26689	3.98296
20101987	Open Sea	chr6:118973455-118973456	-0.290532	0.00417293	0.852568	2.2108	4.27421	2.8887	2.04616	3.89745	2.5082	1.43011	2.04616	3.95591
20391099	Open Sea	chr6:139116876-139116877	-0.23054	0.0187155	1.29763	3.27426	3.02781	1.61158	0.412884	2.40444	0.908344	1.62605	1.63502	3.24409
20436865	Open Sea	chr6:142409304-142409305	-0.302145	0.0392521	4.17773	4.57651	5.01446	3.41221	5.64693	6.70194	1.66549	2.9484	2.44675	0.949484
20494727	Open Sea	chr6:146350230-146350231	-0.217819	0.0242517	2.27681	3.31404	4.44346	4.16295	0.385902	2.62954	3.83864	4.7814	3.04513	3.26026
20494809	Open Sea	chr6:146350969-146350970	-0.427354	0.0101766	1.38402	2.36952	4.12025	5.57775	2.94304	4.03906	5.65575	2.90736	5.36671	3.50066
20508907	Open Sea	chr6:147523200-147523201	-0.363479	0.00474041	3.9259	5.33983	7.39645	5.26541	2.65337	5.23884	4.22889	4.56217	4.88995	2.76905
20508909	Open Sea	chr6:147523223-147523224	-0.439156	0.000157559	5.43323	6.61745	4.78409	3.72268	2.99898	3.76403	4.78409	5.15503	5.51914	5.29413
20508911	Open Sea	chr6:147523242-147523243	-0.409125	0.000432916	4.4315	5.37343	5.66208	3.76632	4.39334	4.06688	4.10334	4.9027	4.90785	3.36982
20533985	Open Sea	chr6:148881461-148881462	-0.22032	0.0354613	2.3107	0.269384	3.25269	2.92794	3.17251	3.60275	1.03229	2.85272	1.11556	2.5337
20695361	Open Sea	chr6:157009180-157009181	-0.367397	0.0041945	2.97968	3.36169	4.88972	4.52089	2.27023	3.82755	4.88972	4.0191	2.97968	2.52821
20713567	Shore	chr6:157800858-157800859	-0.209348	0.0187431	3.80107	4.03298	3.80107	3.03096	2.62201	3.62007	6.36993	2.04012	4.62565	4.04307
20758023	Open Sea	chr6:159290253-159290254	-0.238336	0.0253374	0.378747	1.27323	1.93582	3.97199	2.00352	2.35503	3.00631	1.52272	2.04704	1.78011
20760229	Open Sea	chr6:159359852-159359853	-0.222305	0.0361306	2.15546	1.37187	0.939548	1.7763	2.2674	1.29046	2.58844	1.59575	1.59575	2.2674
20760233	Open Sea	chr6:159359940-159359941	-0.248549	0.0234348	1.98043	2.0678	2.23652	1.98043	1.53033	1.14255	1.66006	1.72618	1.08924	2.09045
20760235	Open Sea	chr6:159359954-159359955	-0.312494	0.024446	2.78471	2.42935	2.5478	1.88609	1.83708	2.07398	1.98287	1.57542	1.60017	1.83708
20760345	Open Sea	chr6:159360984-159360985	-0.257058	0.00157758	3.19671	4.7298	4.49493	4.66856	3.39708	3.52841	3.44393	3.23608	2.17335	6.09579
20908043	Open Sea	chr6:166422487-166422488	-0.266538	0.0107525	1.3586	3.33454	4.85867	6.95976	4.31056	3.05568	3.47397	3.84306	4.31056	7.54847
21020773	Island8781	chr6:169977489-169977490	-0.132879	0.0139961	0.835115	1.54585	1.54585	1.54585	1.06652	1.54585	0.333419	1.37963	0.858806	1.54585
21020775	Island8781	chr6:169977513-169977514	-0.10859	0.242939	1.35172	1.70104	1.25645	1.08973	0.791181	1.70104	1.70104	1.19294	0.0708766	1.70104
21020777	Island8781	chr6:169977525-169977526	-0.185877	0.00886817	1.38361	1.32759	1.71168	1.14927	1.52857	1.39673	1.71168	1.5992	1.71168	1.71168
21020781	Island8781	chr6:169977542-169977543	-0.195956	0.0392547	0.76455	1.07789	1.20323	0.618325	0.72467	0.840184	0.45121	1.20323	1.20323	1.20323
21020839	Island8781	chr6:169977858-169977859	-0.117528	0.0364574	1.01881	1.01881	1.01881	1.01881	0.706596	1.01881	0.449476	0.50031	1.01881	1.01881
21437521	Open Sea	chr7:11013118-11013119	-0.26422	0.0465168	0.781464	2.91165	4.09513	2.2592	2.85173	2.3004	4.50829	3.07881	4.29979	1.74155
21437523	Open Sea	chr7:11013129-11013130	-0.234955	0.0204114	-0.734652	2.17034	4.18246	1.95907	2.55768	2.23669	4.20838	3.54607	3.89741	3.48279
21459127	Open Sea	chr7:12726036-12726037	-0.324545	0.000505999	4.54984	2.93165	5.38785	4.99503	4.34976	4.30395	3.63043	4.16698	4.72792	5.81361
21459129	Open Sea	chr7:12726055-12726056	-0.273214	0.000787335	6.73055	3.80203	4.61493	3.13941	5.41258	4.22742	3.27173	4.15677	5.53103	7.51089
21459131	Open Sea	chr7:12726065-12726066	-0.271897	0.00025396	2.9946	2.92046	2.17196	3.1644	3.54708	2.95699	3.54138	3.34269	2.48582	3.80177
21459133	Open Sea	chr7:12726067-12726068	-0.292682	0.0127566	2.93789	-1.29673	3.30551	3.13962	3.64388	4.06974	3.81145	3.23889	3.56791	3.37384
21459135	Open Sea	chr7:12726089-12726090	-0.297245	0.00101502	3.67066	2.2842	2.56738	3.43958	3.92518	3.63735	3.42755	4.00352	3.29146	4.88641
21459137	Open Sea	chr7:12726099-12726100	-0.288069	0.000574228	3.69717	2.83362	2.12203	2.69915	3.81634	3.84349	3.23597	3.55746	2.90352	4.29979
21612015	Island9255	chr7:23245557-23245558	-0.281341	0.0269924	3.71485	1.51971	3.93337	2.5175	3.14461	4.05256	3.01345	2.61165	4.3725	1.19499
21612017	Island9255	chr7:23245562-23245563	-0.268504	0.279914	5.26671	3.54686	5.33889	1.60027	6.92776	5.09144	6.80035	3.62702	7.40632	0.506323
21612019	Island9255	chr7:23245576-23245577	-0.354924	0.00022675	4.6876	4.24666	7.10211	2.35252	6.24432	6.96444	5.41986	4.90583	8.34113	2.83436
21612021	Island9255	chr7:23245584-23245585	-0.345975	0.00357042	4.68857	2.43586	5.91325	2.6821	4.47033	3.80899	3.09677	3.13205	4.96633	1.62783
21612023	Island9255	chr7:23245591-23245592	-0.334184	0.00422936	3.04265	2.33485	5.16416	2.32556	4.50189	4.15345	3.80193	2.83368	5.16416	2.0404
21612025	Island9255	chr7:23245593-23245594	-0.309323	0.0165307	3.10473	1.21307	4.86273	3.39617	4.49815	3.89743	2.27901	2.87322	4.85333	0.528465
21612027	Island9255	chr7:23245596-23245597	-0.356758	0.00712964	5.16217	2.21236	6.17934	2.94981	4.35558	2.97991	4.24035	3.68037	4.61992	1.76989
21612029	Island9255	chr7:23245598-23245599	-0.296866	0.227985	4.05693	3.0127	7.04863	0.879815	6.29406	3.75143	4.65045	3.48053	7.72282	2.22398
21612031	Island9255	chr7:23245608-23245609	-0.241296	0.377168	6.03533	1.7751	5.17314	0.400302	4.55523	4.88574	5.79748	5.0746	10.0269	2.40695
21612033	Island9255	chr7:23245621-23245622	-0.213926	0.377311	3.24822	2.9425	8.17786	-0.958415	7.8158	3.91333	4.34369	3.16351	6.75374	-0.820698
21612035	Island9255	chr7:23245624-23245625	-0.260555	0.296692	3.486	4.27841	8.28747	1.56713	4.36455	2.12311	2.28015	2.93364	7.10355	1.17766
21612037	Island9255	chr7:23245656-23245657	-0.191862	0.69842	6.1536	3.14917	6.26129	-0.116969	4.72556	5.3086	3.91242	4.91834	8.89983	-1.16969
21612039	Island9255	chr7:23245667-23245668	-0.33903	0.00349022	7.29326	5.38618	11.4717	0.0670337	6.09424	5.32827	4.29098	7.16237	9.2432	0.488388
21612041	Island9255	chr7:23245687-23245688	-0.14869	0.520537	2.76292	5.10353	8.54423	4.54178	9.16683	7.74374	4.80861	8.67577	7.06965	-0.794812
21612043	Island9255	chr7:23245697-23245698	-0.273065	0.642035	8.35564	6.78829	10.2915	0.696303	9.44983	4.58676	2.88469	6.23162	12.7324	-1.49208
21612045	Island9255	chr7:23245717-23245718	-0.23983	0.786276	9.6881	3.45599	9.6881	-1.07646	10.3213	4.16036	3.22937	5.45917	9.6881	-1.07646
21612047	Island9255	chr7:23245721-23245722	-0.314581	0.886426	9.36691	5.16512	10.9876	-1.55774	9.08679	5.5853	3.48441	4.82898	6.42566	-1.55774
21612145	Island9255	chr7:23246105-23246106	-0.38367	0.00972142	2.46734	2.61248	2.77931	2.71765	2.83041	3.01564	3.01564	2.36291	3.01564	3.01564
21612147	Island9255	chr7:23246113-23246114	-0.405936	0.0322371	3.19514	2.5043	2.97478	3.19514	3.02697	2.44334	3.19514	2.56659	3.19514	1.45234
21612149	Island9255	chr7:23246117-23246118	-0.387732	0.120827	2.53131	2.22626	3.45867	3.69051	2.67268	1.74306	3.32445	2.23216	3.69051	3.05822
21612151	Island9255	chr7:23246123-23246124	-0.411097	0.0531574	3.27182	2.58177	3.4794	3.20263	3.32125	2.72742	3.4794	2.45748	3.4794	2.37232
21612153	Island9255	chr7:23246139-23246140	-0.374419	0.0875307	2.60466	2.61525	2.97529	2.67526	2.41523	2.49063	2.45024	2.1029	2.23404	2.97529
21612155	Island9255	chr7:23246146-23246147	-0.401085	0.0062581	2.87079	2.52591	3.05891	3.05891	2.3321	2.61781	3.05891	2.28103	3.05891	3.05891
21612157	Island9255	chr7:23246150-23246151	-0.362796	0.0744222	2.82795	1.71985	2.82795	2.28929	2.68743	2.48774	2.33073	2.03103	2.82795	2.39702
21612159	Island9255	chr7:23246160-23246161	-0.375146	0.0556013	2.58863	2.12644	2.8041	3.03519	2.41434	2.64465	2.50646	2.08806	3.3356	3.3356
21612163	Open Sea	chr7:23246212-23246213	-0.365198	0.0441261	2.53176	2.19008	2.94178	2.46702	2.21681	2.95308	2.58571	3.07742	3.17915	2.85546
21649817	Open Sea	chr7:25219156-25219157	-0.207719	0.00541641	0.538885	1.57024	2.97805	2.21445	1.63604	2.02775	0.245251	2.72171	2.46753	1.97009
21649819	Open Sea	chr7:25219198-25219199	-0.25323	0.00367376	1.82184	1.31605	3.36054	2.17061	2.31915	2.00936	1.48062	1.86268	0.997182	1.58825
21649827	Open Sea	chr7:25219356-25219357	-0.202442	0.0106391	2.88125	1.54297	2.96856	5.69627	3.80473	2.82637	3.69391	4.92049	4.80209	2.25981
21722609	Open Sea	chr7:28789070-28789071	0.275773	0.00988171	-3.33717	-3.23965	-1.87051	-1.53658	-1.55351	-2.22408	-3.00979	-2.98493	-3.60762	-1.58122
21722613	Open Sea	chr7:28789134-28789135	0.364731	0.00377515	-4.30698	-4.50149	-2.44646	-2.60503	-2.99518	-4.06384	-2.88557	-3.08073	-4.06384	-4.50149
21763443	Open Sea	chr7:30810787-30810788	-0.224306	0.0127462	2.88041	3.35117	3.25309	5.11652	3.87423	4.97849	4.13577	1.68782	0.81631	3.58193
21797705	Open Sea	chr7:32801144-32801145	-0.282302	0.00357042	2.55467	1.68402	3.51239	2.47211	2.59821	2.08904	2.53049	2.28023	3.4616	3.30596
21797707	Open Sea	chr7:32801155-32801156	-0.238698	0.0100249	5.03156	0.436192	5.21433	1.08372	4.03681	3.92993	3.36249	1.92923	5.81748	6.75957
21797735	Open Sea	chr7:32801406-32801407	-0.273576	0.0106911	1.00729	5.83479	4.86171	2.43893	7.10634	5.73346	5.8039	3.93424	7.09322	2.03513
21840201	Open Sea	chr7:35494731-35494732	-0.284164	0.00699485	4.80689	3.96988	2.56928	6.43152	4.20401	1.76073	3.1315	4.19151	4.89151	2.05466
21849297	Open Sea	chr7:36010882-36010883	-0.262489	0.00310487	2.59215	2.59215	4.48775	3.82068	3.42586	2.2708	3.24255	2.58063	4.34099	2.59215
21849299	Open Sea	chr7:36010951-36010952	-0.233887	0.00167584	2.00264	1.97995	3.77495	3.31697	3.37075	2.76469	1.79131	2.29392	3.337	2.80567
21849301	Open Sea	chr7:36010961-36010962	-0.269469	0.00407403	1.52014	2.45888	2.4877	4.17115	2.19347	2.46082	3.77778	2.83709	3.23524	2.19347
21914819	Open Sea	chr7:39873462-39873463	-0.299826	0.00522937	2.84401	2.32809	5.12185	0.398436	4.95283	6.04435	4.20164	4.33488	2.68601	3.41676
21914825	Open Sea	chr7:39873504-39873505	-0.203001	0.0350156	0.796815	2.48371	5.7232	1.49101	5.70246	4.32285	2.69428	3.0655	4.84298	3.61443
21914827	Open Sea	chr7:39873519-39873520	-0.294871	0.00634298	2.6099	1.47037	5.5466	3.05142	3.92332	4.3412	3.81082	3.93739	5.44646	4.41834
21914833	Open Sea	chr7:39873561-39873562	-0.271963	0.0156766	3.45704	1.36138	2.03876	1.76762	2.68343	5.0935	2.98428	2.5649	3.21157	2.39333
21914835	Open Sea	chr7:39873565-39873566	-0.354223	0.0022588	3.5188	2.50924	2.13446	3.33584	3.16398	4.28112	4.57821	3.61793	2.1583	3.60592
21915203	Open Sea	chr7:39894612-39894613	-0.223491	0.015164	2.503	2.40605	6.96159	3.81808	6.89595	5.57402	2.88966	4.84846	5.71185	1.41709
22051941	Island9449	chr7:47092245-47092246	-0.491835	0.00273022	5.45398	4.19905	5.62156	4.22022	5.73714	3.4198	5.4729	4.37601	3.94573	2.04136
22051943	Island9449	chr7:47092254-47092255	-0.453003	0.185131	2.44615	4.77573	4.68532	3.21626	4.69747	2.9864	5.81537	4.08263	4.5777	3.26722
22051945	Island9449	chr7:47092260-47092261	-0.532284	0.000627176	6.30232	5.73197	6.24723	4.36314	6.18112	4.63584	7.94715	5.41251	6.54472	5.31758
22051947	Island9449	chr7:47092264-47092265	-0.525499	0.138577	5.24071	5.92861	7.00713	4.01835	6.01658	4.59081	7.93941	5.17843	6.4744	4.31997
22051949	Island9449	chr7:47092268-47092269	-0.518651	0.000111376	4.55526	5.31957	6.34042	4.4024	5.28288	4.16027	6.15157	5.37762	5.02774	3.8521
22051951	Island9449	chr7:47092290-47092291	-0.510199	0.000871004	5.80875	6.75186	7.8678	6.26316	7.03944	5.7276	8.76242	5.52474	5.33042	4.20798
22051953	Island9449	chr7:47092293-47092294	-0.462546	0.00417293	4.8897	5.78042	7.8889	5.08764	5.28818	4.40899	8.67527	5.48472	4.32887	3.15624
22051955	Island9449	chr7:47092301-47092302	-0.418632	0.149284	4.89269	6.50132	7.07878	4.68113	5.96031	5.02653	9.18949	4.45547	5.74812	2.45675
22051957	Island9449	chr7:47092303-47092304	-0.470308	0.265158	4.24852	4.16174	6.16625	3.56994	5.41427	4.41109	7.06775	5.68383	4.40245	1.77542
22051959	Island9449	chr7:47092308-47092309	-0.517414	0.000999829	4.12579	5.46667	6.58269	3.68374	5.80189	3.35045	6.64438	4.97565	4.91699	3.33704
22051961	Island9449	chr7:47092314-47092315	-0.448099	0.00796237	5.29422	5.2623	5.47509	5.31781	5.47509	3.913	7.54222	4.66592	5.14623	2.89118
22051963	Island9449	chr7:47092316-47092317	-0.428135	0.0053005	3.48377	5.25106	5.92798	4.24641	5.53442	3.89299	7.10865	4.20616	4.24641	3.7634
22051965	Island9449	chr7:47092327-47092328	-0.463797	0.00452017	5.92774	6.72971	6.77967	5.73054	5.36499	4.0012	6.9795	6.05635	2.45201	4.43851
22051967	Island9449	chr7:47092334-47092335	-0.473882	0.00467295	4.46873	6.43061	6.98796	3.81477	5.56002	3.66011	6.55323	6.54774	4.75724	1.90738
22051969	Island9449	chr7:47092339-47092340	-0.571335	0.00022675	5.40641	5.97273	6.22925	4.86507	5.97273	3.60195	6.78891	6.14399	5.9261	3.00483
22051971	Island9449	chr7:47092345-47092346	-0.54011	0.000261656	5.96512	6.50146	8.05546	6.35706	7.22697	3.91833	7.60414	5.89276	5.96512	3.32469
22051973	Island9449	chr7:47092357-47092358	-0.49666	0.000723225	7.5773	7.88141	9.18602	7.04995	9.59874	7.88141	9.66592	7.33233	5.24583	3.2518
22051975	Island9449	chr7:47092367-47092368	-0.535259	0.000195604	6.40886	6.40132	7.56163	5.91229	6.28581	5.1083	6.33793	5.19698	4.9014	5.02232
22051977	Island9449	chr7:47092372-47092373	-0.535041	5.44285e-05	7.66171	7.37956	8.88758	8.06145	7.84801	7.36071	9.43047	7.13748	7.36071	3.68492
22051979	Island9449	chr7:47092384-47092385	-0.545321	3.64971e-05	9.47788	9.59089	10.9721	11.0559	9.43257	6.98042	10.3851	8.3442	8.03704	2.75395
22051981	Island9449	chr7:47092399-47092400	-0.528702	0.000134519	7.37059	7.93784	10.6861	11.1388	9.10169	7.20042	9.10169	8.65139	7.58331	4.7116
22051983	Island9449	chr7:47092403-47092404	-0.539293	1.69498e-05	10.2665	10.6145	12.1847	12.8756	10.375	8.62562	11.6613	7.186	8.94517	5.31393
22051985	Island9449	chr7:47092414-47092415	-0.4474	0.000258064	7.50732	7.86117	8.27206	10.2317	9.28351	8.62837	8.71457	7.12892	8.27206	5.21729
22051987	Island9449	chr7:47092417-47092418	-0.496219	0.175287	5.67206	6.94966	6.86595	8.06741	6.50592	6.63994	7.9517	5.13693	5.79959	3.02974
22051989	Island9449	chr7:47092460-47092461	-0.557235	1.69498e-05	7.75565	8.43446	9.39698	9.17734	8.56358	7.66326	8.54326	7.32329	9.60411	3.41029
22051991	Island9449	chr7:47092471-47092472	-0.498117	0.000132141	5.37921	6.24492	6.93316	7.98535	7.53741	6.54581	4.17957	6.79762	6.75921	3.11435
22051993	Island9449	chr7:47092484-47092485	-0.477163	0.000190324	6.09689	5.81247	5.54439	6.89034	6.67285	5.82122	6.10082	5.42879	6.22983	2.5462
22051995	Island9449	chr7:47092486-47092487	-0.473397	0.000111376	6.02727	8.15859	8.48192	11.9122	7.85845	8.63973	7.82679	7.769	8.58397	3.70322
22051997	Island9449	chr7:47092492-47092493	-0.529702	0.000141542	7.09768	6.60424	5.91699	7.12143	6.58772	4.92092	6.07285	6.62157	6.18557	3.85852
22051999	Island9449	chr7:47092501-47092502	-0.516426	2.68924e-05	6.33271	6.67832	6.42339	7.86835	6.85813	6.17401	6.37543	6.27099	7.31542	4.26593
22052001	Island9449	chr7:47092505-47092506	-0.495136	0.000130017	7.81367	6.90002	6.74287	8.48369	7.8833	7.34427	7.17005	6.87445	5.47044	3.97446
22052003	Island9449	chr7:47092507-47092508	-0.484671	0.000303244	6.35678	6.60451	7.4217	9.37134	7.80561	7.39354	6.61891	6.38955	6.25193	3.57815
22052005	Island9449	chr7:47092513-47092514	-0.503141	0.00147364	5.66554	6.80173	6.26413	9.88281	6.26046	5.99388	6.93283	5.74558	8.15788	2.35204
22052009	Island9449	chr7:47092527-47092528	-0.358287	0.115187	7.17929	8.40861	8.97694	13.157	7.39341	7.86658	7.82374	9.6738	11.6557	2.02553
22052011	Island9449	chr7:47092529-47092530	-0.455781	0.0004388	5.74809	8.11157	9.27393	9.8959	7.65574	9.71863	9.03809	6.87469	11.8981	2.47995
22052013	Island9449	chr7:47092548-47092549	-0.472511	0.000310691	7.02735	7.21846	7.98628	8.28685	6.15449	7.59999	7.1119	7.65725	8.5775	1.41417
22052015	Island9449	chr7:47092553-47092554	-0.53098	0.000261046	8.36122	7.92116	7.81806	7.72578	6.29368	7.76211	7.69645	7.62603	10.4008	3.85158
22052017	Island9449	chr7:47092561-47092562	-0.520788	0.000229364	5.42884	5.49404	5.6206	6.75312	4.1421	4.89966	5.50293	5.749	5.35798	2.16909
22052019	Island9449	chr7:47092567-47092568	-0.516858	5.09476e-05	5.94361	6.87641	7.38158	7.7267	5.463	5.66674	4.7655	6.7885	6.49737	2.59578
22052021	Island9449	chr7:47092571-47092572	-0.502694	1.81194e-05	5.53964	5.34472	4.54485	5.45222	5.07697	5.25115	4.65198	5.37084	6.14067	3.61637
22052023	Island9449	chr7:47092583-47092584	-0.477937	0.0842701	4.57208	5.29673	4.68566	6.33267	4.36893	4.06346	5.09492	5.97646	5.40436	2.55066
22052025	Island9449	chr7:47092588-47092589	-0.444587	6.68729e-05	6.66292	6.51365	2.89924	7.48527	7.15424	5.73591	6.15306	6.09201	5.73591	3.41837
22052027	Island9449	chr7:47092591-47092592	-0.511155	3.20003e-05	7.11372	6.30076	5.75446	7.20733	6.92458	6.85192	6.49587	7.91463	5.87803	4.97502
22052029	Island9449	chr7:47092593-47092594	-0.527546	2.73116e-05	5.99149	7.4258	5.64122	8.77775	7.2957	7.4258	7.30501	8.91042	7.86795	3.80229
22052031	Island9449	chr7:47092600-47092601	-0.524075	0.000111376	6.87657	5.73735	6.79458	9.66423	8.46753	7.49605	7.86045	7.67364	6.87657	3.64945
22052033	Island9449	chr7:47092603-47092604	-0.451232	0.00179037	3.52942	5.70646	3.4903	7.46577	6.79097	6.22863	6.55738	7.12837	5.9628	2.23605
22052035	Island9449	chr7:47092609-47092610	-0.522955	5.83409e-05	5.2116	7.1267	7.17022	8.90099	7.14665	8.25661	7.60548	6.21763	6.44273	3.20944
22052037	Island9449	chr7:47092623-47092624	-0.510323	0.000433114	5.27861	5.73762	5.47188	8.13308	6.57914	4.81094	6.65564	7.57366	4.6666	3.27566
22052039	Island9449	chr7:47092633-47092634	-0.510291	0.000224982	7.12113	7.33905	3.58002	8.80089	8.10478	6.15975	8.75549	7.96555	5.22872	2.44093
22052041	Island9449	chr7:47092637-47092638	-0.415685	0.000351054	2.67122	5.33713	3.91118	6.12933	6.4066	4.95882	5.62232	6.98246	4.81178	3.09635
22052043	Island9449	chr7:47092639-47092640	-0.462813	0.000134519	5.22556	5.28176	4.16896	8.04315	6.60595	3.82712	5.69825	7.56517	6.10606	3.64066
22052045	Island9449	chr7:47092646-47092647	-0.477186	0.000290221	4.91408	6.22203	5.62859	6.92272	7.32315	5.60405	8.18039	6.89641	7.88018	2.65148
22052047	Island9449	chr7:47092659-47092660	-0.470665	0.00025396	6.10513	8.95532	4.34591	8.58105	6.16097	5.79796	9.50068	8.48109	5.51562	2.48351
22052049	Island9449	chr7:47092661-47092662	-0.454527	0.0009628	3.88327	6.7798	3.88327	7.48436	5.49245	4.50395	8.02117	6.74797	5.81429	1.7767
22052051	Island9449	chr7:47092670-47092671	-0.44676	0.00022675	7.02024	5.25684	5.29909	7.04858	6.53831	4.58653	8.87378	6.67823	4.02725	5.02026
22052053	Island9449	chr7:47092673-47092674	-0.485175	0.00089639	4.18716	6.54401	2.98768	6.85429	5.99512	2.9408	7.26276	5.89859	5.91719	2.86905
22052055	Island9449	chr7:47092685-47092686	-0.474439	0.000191566	5.69774	7.08406	5.28639	8.22752	7.01404	5.42008	9.25882	6.35589	3.87915	4.49589
22052057	Island9449	chr7:47092708-47092709	-0.473705	0.00017534	1.62983	7.94889	5.06184	6.63131	5.98435	6.52011	7.40096	6.33923	5.94391	5.90733
22052059	Island9449	chr7:47092723-47092724	-0.451291	0.00153223	1.81965	6.03652	3.95458	4.84414	4.6154	4.77452	5.82552	4.36076	3.44309	3.56318
22052061	Island9449	chr7:47092727-47092728	-0.451376	0.000305614	3.47225	4.79802	3.71776	4.92428	3.99835	3.81458	4.57706	4.10357	3.32494	3.82114
22052063	Island9449	chr7:47092732-47092733	-0.413443	0.000505999	2.35832	4.99238	3.68866	4.87895	4.95247	3.83387	4.4536	3.95816	4.2291	2.51586
22052065	Island9449	chr7:47092736-47092737	-0.475969	0.000940039	2.66428	4.84968	4.17145	5.73565	4.13454	3.62639	5.68834	4.09282	4.28449	3.32035
22052067	Island9449	chr7:47092739-47092740	-0.354347	0.11865	3.53454	3.62324	2.25865	4.24653	3.91287	3.17367	4.51022	3.16446	4.51022	1.8
22052069	Island9449	chr7:47092745-47092746	-0.44083	0.000511625	2.70978	4.19541	4.20789	3.97351	4.36693	3.21176	3.50293	3.90916	4.20789	2.23238
22052071	Island9449	chr7:47092760-47092761	-0.345473	0.0968696	2.86387	4.61126	3.28171	4.26083	3.58584	4.05867	3.57117	4.03475	5.13689	3.13447
22052073	Island9449	chr7:47092766-47092767	-0.342409	0.00642791	3.02855	4.45124	4.70812	5.49649	3.36446	3.81093	4.04376	4.77743	2.35672	1.80705
22052075	Island9449	chr7:47092778-47092779	-0.431301	0.000408321	3.01619	5.32215	3.67174	5.23677	4.57312	3.92928	5.44535	4.6673	3.39181	3.92928
22052077	Island9449	chr7:47092802-47092803	-0.363664	0.00308594	3.21215	3.87721	2.25608	4.13951	3.84575	3.145	3.13862	3.5727	3.75015	1.36008
22052079	Island9449	chr7:47092829-47092830	-0.251811	0.0301542	3.03742	2.1746	1.75577	3.24078	2.23064	2.35643	2.92971	2.64237	1.45488	1.64968
22052081	Island9449	chr7:47092839-47092840	-0.221717	0.133623	3.82193	3.82193	2.26655	3.02804	3.20231	2.77216	3.01544	3.22518	2.23415	1.19387
22052083	Island9449	chr7:47092859-47092860	-0.084199	0.370334	1.06786	0.891969	1.61622	1.36857	1.43768	1.12489	0.928722	0.885072	0.976465	1.12093
22052085	Island9449	chr7:47092868-47092869	-0.115308	0.323439	2.1325	2.21307	1.05032	1.91916	2.3329	1.75984	2.7337	2.27874	2.37554	0.913827
22052087	Island9449	chr7:47092883-47092884	-0.0950309	0.290755	1.6145	1.62318	1.20578	1.17071	1.66596	1.10575	2.21531	1.98909	2.44827	0.248028
22052089	Island9449	chr7:47092904-47092905	-0.026712	0.827574	1.8588	1.51902	0.594817	0.750043	0.127315	1.29952	1.36506	0.514137	0.730244	0.103267
22052091	Island9449	chr7:47092909-47092910	-0.0181921	0.558149	-0.575089	2.1958	0.6441	1.5383	0.579446	1.5092	2.1958	1.66439	-1.20705	-1.99798
22052093	Island9449	chr7:47092928-47092929	-0.0569978	0.53556	0.513298	0.395474	0.185599	0.513298	1.60043	1.50853	1.14495	1.57286	0.974299	0.166874
22052095	Island9449	chr7:47092955-47092956	-0.0446767	0.675607	1.29248	0.60495	1.27308	0.9553	0.662736	0.966934	0.236598	0.389775	0.999584	0.594036
22052097	Island9449	chr7:47092991-47092992	-0.0091161	0.899048	-0.782569	0.240953	0.721145	1.46178	-1.22168	0.690285	1.46178	0.740382	-1.43133	1.46178
22052099	Island9449	chr7:47093015-47093016	-0.0377626	0.511834	1.18051	0.223655	0.886931	0.108302	2.2645	1.08373	1.05493	2.2645	-0.0156173	1.2921
22052101	Island9449	chr7:47093024-47093025	-0.00975379	0.677165	-0.61589	0.417145	1.08197	-2.51676	1.08197	1.08197	0.42506	1.08197	1.08197	-0.494615
22052103	Island9449	chr7:47093042-47093043	-0.00322545	0.804042	0.984618	0.146362	-0.393847	-0.492309	0.984618	0.984618	0.984618	-0.0158809	-1.44797	-0.895107
22052105	Island9449	chr7:47093045-47093046	-0.00417036	0.862596	0.868812	0.152629	0.868812	0.868812	-1.1311	0.171476	0.171476	0.868812	-0.150371	-2.24869
22052107	Island9449	chr7:47093055-47093056	-0.0108887	0.796771	0.247687	-0.404121	1.27972	-2.62186	-0.404121	1.27972	0.794975	0.407183	-0.806778	0.365633
22052109	Island9449	chr7:47093069-47093070	-0.00752262	1	0.910285	-0.472426	-0.0738069	-0.0738069	-0.324	0.0222021	0.303428	0.277043	-0.46373	-0.160639
22052111	Island9449	chr7:47093075-47093076	-0.00782805	0.878288	-0.618177	-0.325356	0.662332	1.76622	0.395877	0.257108	-0.362706	0.321131	0.987005	-1.07235
22088713	Island9458	chr7:48887510-48887511	-0.192737	0.192414	1.86938	1.5698	2.81396	1.59992	1.96931	2.27148	1.15462	2.63875	2.66967	2.21989
22088715	Island9458	chr7:48887516-48887517	-0.193607	0.158735	0.677197	2.57941	2.48301	1.72566	1.5806	3.1045	2.30372	3.06531	2.49766	1.79451
22088717	Island9458	chr7:48887520-48887521	-0.168735	0.451784	1.83646	1.21077	2.61319	1.15018	1.31865	1.93968	1.24979	2.33065	2.15872	2.26867
22088719	Island9458	chr7:48887538-48887539	-0.28671	0.018177	1.71353	3.6745	3.8701	2.06904	2.60113	3.29871	1.94267	3.79724	4.1632	1.71353
22088721	Island9458	chr7:48887541-48887542	-0.206599	0.167925	0.844481	2.61712	2.60855	1.65218	1.44853	3.58252	2.57845	3.89906	1.83681	0.304055
22088723	Island9458	chr7:48887558-48887559	-0.296573	0.00460765	2.66672	2.20397	2.40821	2.86379	2.25793	4.50349	3.55563	4.27865	3.3334	1.34394
22088725	Island9458	chr7:48887561-48887562	-0.348996	0.013264	1.6469	2.56832	3.92452	2.85876	2.61033	4.38004	3.84008	3.86378	3.33372	1.87226
22088727	Island9458	chr7:48887563-48887564	-0.288322	0.0910245	1.93447	1.3745	2.97765	2.89486	2.23053	4.56831	3.55719	3.96628	3.76174	1.36781
22088729	Island9458	chr7:48887575-48887576	-0.304561	0.0913014	1.09978	2.85228	2.76991	2.42535	2.52302	3.04056	3.26935	2.86482	2.4494	2.14628
22088733	Island9458	chr7:48887621-48887622	-0.265807	0.165282	1.71821	5.3414	2.13656	0.296087	1.33535	4.37024	3.15628	3.29661	3.82132	2.7314
22088735	Island9458	chr7:48887638-48887639	-0.354302	0.00834679	1.17278	3.0023	2.78481	3.59082	2.73739	3.35439	4.03472	3.47204	4.36699	2.9133
22088737	Island9458	chr7:48887640-48887641	-0.355823	0.00642791	1.75535	4.6461	2.48674	3.05357	2.39026	4.70582	3.56642	4.03151	3.99829	3.86685
22088739	Island9458	chr7:48887643-48887644	-0.302669	0.0194718	2.50025	4.85717	1.09914	1.53504	2.6075	3.12974	3.64932	3.37772	5.71763	2.50025
22088741	Island9458	chr7:48887653-48887654	-0.260057	0.243785	1.12973	3.14081	2.36476	1.11885	2.73084	3.86395	3.47001	3.08707	3.03461	1.05552
22088743	Island9458	chr7:48887657-48887658	-0.30739	0.0311611	0.638544	3.2357	1.38564	1.07581	1.7674	3.39505	3.38596	2.62901	3.55689	1.41392
22088745	Island9458	chr7:48887660-48887661	-0.21251	1	-1.48182	4.6559	-0.797904	-1.48182	3.18125	0.757194	6.16726	3.0655	4.01394	2.18202
22088747	Island9458	chr7:48887672-48887673	-0.332694	0.0227256	1.58259	3.18993	1.15212	1.70845	2.14898	3.57847	4.20591	3.14018	3.75378	2.26823
22088749	Island9458	chr7:48887685-48887686	-0.344703	0.00663107	1.53036	3.89752	1.35926	1.80364	2.9707	5.56551	5.29067	2.79483	6.34006	2.40485
22088751	Island9458	chr7:48887689-48887690	-0.321612	0.0269771	0.398441	3.77808	1.15635	1.39455	1.8633	3.4579	4.44511	2.00176	4.02064	2.05861
22088791	Island9458	chr7:48887801-48887802	-0.331737	0.0167073	1.57011	2.93973	1.2063	1.86115	1.2063	2.73429	2.14181	2.46563	3.17086	2.84343
22601569	Open Sea	chr7:74868229-74868230	-0.204249	0.0307648	3.34118	3.45828	4.4957	0.780588	1.66792	2.25948	1.21938	2.4319	1.92145	1.24538
22633755	Island9691	chr7:75779629-75779630	-0.313357	0.00638739	1.38768	1.57318	2.70758	2.44643	1.56372	2.82597	1.52585	2.42563	2.66889	2.41844
22633757	Island9691	chr7:75779637-75779638	-0.323482	0.00689419	1.85974	1.90847	2.93881	1.67221	1.79808	2.85859	1.79428	2.96952	2.67264	3.17304
22633759	Island9691	chr7:75779640-75779641	-0.263432	0.179222	1.42981	1.47535	2.1815	2.1815	2.48624	2.6447	1.85238	2.81701	2.25986	3.27856
22633761	Island9691	chr7:75779644-75779645	-0.300116	0.0110152	1.89983	1.91593	3.20023	2.25279	1.56069	2.55971	1.39071	2.60018	3.20023	3.44085
22633763	Island9691	chr7:75779653-75779654	-0.332828	0.0116647	1.7818	2.01206	2.62606	1.61162	2.01206	2.44547	1.03687	3.07024	3.3083	3.11727
22633765	Island9691	chr7:75779675-75779676	-0.322126	0.00730611	2.5051	2.0112	3.34582	1.68091	2.35328	3.1202	1.95777	2.51099	3.43387	2.14095
22633767	Island9691	chr7:75779678-75779679	-0.33788	0.00579106	2.42747	2.45848	3.70805	2.15524	2.0525	3.74663	1.42053	2.87599	3.68011	2.81261
22633769	Island9691	chr7:75779681-75779682	-0.370091	0.0146955	2.30133	2.16465	3.60053	1.01841	1.95601	3.33798	2.00773	3.03327	3.55177	3.20532
22633771	Island9691	chr7:75779689-75779690	-0.326473	0.0140673	1.87842	1.34173	3.01889	1.34173	2.01259	3.34295	1.18388	2.36776	3.38116	2.75407
22633773	Island9691	chr7:75779721-75779722	-0.393788	0.0358898	2.98654	2.57108	4.97317	2.33781	2.76412	4.15143	1.60897	3.12953	4.14142	3.96781
22633775	Island9691	chr7:75779724-75779725	-0.378888	0.00863789	2.04001	2.21228	4.15036	2.95036	1.96464	3.57649	1.46136	3.31292	4.54267	3.337
22633779	Island9691	chr7:75779766-75779767	-0.340133	0.431879	-0.245798	2.5992	4.79652	1.78078	2.78171	4.40211	1.97564	3.38113	2.01721	6.34057
22633781	Island9691	chr7:75779779-75779780	-0.393893	0.273162	3.50448	1.92181	4.22798	1.49474	2.49835	4.1074	1.92181	3.72351	4.40886	5.76543
22633783	Island9691	chr7:75779788-75779789	-0.370316	0.0538081	2.52757	1.84865	3.08865	1.70464	1.97153	3.89911	1.49891	3.46622	3.52374	4.29686
22633805	Island9691	chr7:75779857-75779858	-0.403574	0.230372	4.19339	2.11827	4.25927	1.23493	3.05153	4.70422	3.57055	3.85083	3.86714	5.90618
22633807	Island9691	chr7:75779862-75779863	-0.384209	0.208411	3.24056	1.97398	4.32526	0.278989	2.45904	4.36878	2.80181	3.72775	4.4222	5.54401
22633809	Island9691	chr7:75779879-75779880	-0.361717	0.0174291	3.36588	2.35611	4.99453	0.525918	3.09732	4.72601	2.31404	3.69372	6.0706	4.62808
22633811	Island9691	chr7:75779908-75779909	-0.382231	0.00910105	3.45316	2.69529	4.60712	0.0542015	2.25216	4.75722	3.02277	3.93475	4.65049	4.90277
22633813	Island9691	chr7:75779916-75779917	-0.38014	0.0140687	3.63945	2.6217	4.59438	0.058465	1.84309	4.52416	3.3002	3.98428	4.71374	5.07184
22633815	Island9691	chr7:75779923-75779924	-0.35813	0.0132028	3.03399	2.99479	4.05815	-0.119357	1.55165	3.86027	3.01942	3.91722	4.63937	4.96961
22633817	Island9691	chr7:75779938-75779939	-0.302376	0.0750101	2.62772	2.7869	3.54886	-0.617398	1.44364	3.72622	2.98383	3.20741	2.58082	3.16375
22633819	Island9691	chr7:75779951-75779952	-0.297841	0.14066	2.21661	2.41788	3.84582	-0.830179	1.35613	4.31693	2.96082	3.10861	3.22195	1.69291
22633821	Island9691	chr7:75779970-75779971	-0.27701	0.262	2.98496	1.43415	3.5107	-0.343052	0.848085	3.80981	3.21933	2.72099	3.21933	0.406923
22633823	Island9691	chr7:75779973-75779974	-0.266687	0.26186	1.98515	2.10225	3.50643	-0.66899	0.898674	4.05768	1.93234	3.01622	3.9678	0.955313
22633825	Island9691	chr7:75779983-75779984	-0.302887	0.136093	1.68562	2.2502	3.59214	-0.24582	1.46407	4.22169	2.90887	3.36902	4.26088	1.55686
22633827	Island9691	chr7:75779986-75779987	-0.312438	0.122035	2.60844	2.68208	3.67786	-0.796417	1.04196	4.26706	3.33143	3.59096	3.92758	1.04196
22633829	Island9691	chr7:75780018-75780019	-0.254298	0.279103	1.73066	3.26569	2.40016	0.268253	0.508755	3.4629	1.70706	3.12962	3.90186	0.894176
22633831	Island9691	chr7:75780021-75780022	-0.247459	0.239161	3.2562	4.06219	3.46729	-0.0303114	0.31432	4.66281	1.83131	3.36962	4.06219	0.740665
22789955	Open Sea	chr7:86850362-86850363	-0.207481	0.00614904	3.06042	1.03079	7.36039	5.27531	5.25454	4.3947	6.37564	4.98157	3.17596	2.81304
22846953	Open Sea	chr7:91510447-91510448	-0.360287	0.000920289	5.33815	4.17986	3.58549	6.45003	5.17692	5.8073	4.54659	3.83513	5.64717	2.66749
22846955	Open Sea	chr7:91510500-91510501	-0.289829	0.00472731	3.60799	2.90439	4.83929	4.66339	4.03015	5.75887	5.91668	3.36968	7.82959	1.69264
22846957	Open Sea	chr7:91510543-91510544	-0.228335	0.000540718	2.13087	2.23852	1.86219	2.58992	2.14534	2.62609	2.13087	2.66054	2.37163	2.05061
22846959	Open Sea	chr7:91510577-91510578	-0.233294	0.00324736	2.45738	2.39271	2.61764	3.49104	2.28185	2.69747	2.74092	3.57124	3.35399	3.10098
22846961	Open Sea	chr7:91510597-91510598	-0.261104	0.0133775	1.92905	1.54528	2.32463	2.85207	2.12135	3.08282	1.8841	2.68035	2.38549	3.45742
22851561	Open Sea	chr7:91764530-91764531	-0.239559	0.0193167	4.50321	0.273272	4.67641	3.94726	5.07862	4.25304	6.16256	4.54055	5.97301	3.33571
22851563	Open Sea	chr7:91764553-91764554	-0.211016	0.0202453	4.73912	1.76248	5.85535	4.30829	1.86879	3.38022	8.80541	6.14588	5.69589	6.41347
22852591	Open Sea	chr7:91808835-91808836	-0.226123	0.00357042	8.11159	6.53949	15.0022	8.56435	7.94713	13.2101	12.1456	8.24814	12.736	3.34848
22852593	Open Sea	chr7:91808874-91808875	-0.275447	0.000698568	5.04438	5.61833	8.62375	8.51418	5.69948	10.5961	9.48573	8.61027	7.97443	0.667086
22852595	Open Sea	chr7:91808881-91808882	-0.283199	0.00623783	3.57888	3.96911	4.8572	5.19737	3.7393	6.1407	7.05907	6.77318	4.64052	2.11772
22852597	Open Sea	chr7:91808899-91808900	-0.325704	0.000195647	5.45238	4.36196	6.96193	7.50106	6.7864	9.73968	9.86492	7.61615	6.39367	4.0866
22852601	Open Sea	chr7:91808936-91808937	-0.369077	0.000564625	3.98784	3.14457	5.31423	5.84725	4.01216	5.84725	6.26038	6.69862	5.4309	2.09048
22852603	Open Sea	chr7:91809001-91809002	-0.364282	0.00220138	3.5689	3.73126	2.6556	7.49348	4.02555	7.43378	6.12614	6.18561	4.4191	3.97075
22852605	Open Sea	chr7:91809020-91809021	-0.371591	0.00702109	2.58779	2.71724	4.12654	6.65261	4.12917	5.0422	5.62268	6.02847	4.80209	3.16091
22852607	Open Sea	chr7:91809044-91809045	-0.33876	0.00218676	2.05788	2.75867	4.00178	5.76857	3.88484	4.70419	3.87056	4.2978	4.42824	2.64885
22852609	Open Sea	chr7:91809085-91809086	-0.270735	0.0387401	1.75138	0.788121	3.31094	1.21624	1.90801	3.99899	3.15613	2.82167	3.6779	0.145948
22860393	Open Sea	chr7:92238199-92238200	-0.200141	0.0424755	1.29443	1.3519	2.37558	1.61477	2.23584	2.25545	1.19502	1.99281	0.174675	0.508146
22861927	Open Sea	chr7:92347886-92347887	-0.211666	0.0210255	-0.273663	0.975883	3.38575	2.73873	1.4898	1.64223	1.37772	1.64223	2.4608	1.91564
22861931	Open Sea	chr7:92347940-92347941	-0.241715	0.00294739	1.08432	1.29057	2.20438	1.99691	0.991972	0.933018	1.71452	0.835072	1.40279	1.89916
22861935	Open Sea	chr7:92347969-92347970	-0.206266	0.0215528	-2.46241	1.25582	1.67684	3.08594	1.45266	0.879033	1.98508	0.930566	1.5007	3.36405
22883959	Open Sea	chr7:94138586-94138587	-0.219753	0.0479512	1.11336	0.679027	3.19524	1.88896	1.40173	2.00207	2.27677	1.80032	2.171	2.66457
22933649	Open Sea	chr7:97557186-97557187	-0.221608	0.0345955	3.4522	1.33061	3.59794	3.34915	3.89194	4.96361	3.85524	2.32272	2.68739	1.56294
23190669	Open Sea	chr7:106807837-106807838	-0.351681	0.0303406	3.4555	1.97022	1.61257	3.77325	4.21022	4.48265	5.38806	2.15069	3.24009	4.37697
23394793	Open Sea	chr7:123198375-123198376	-0.250781	0.00427703	2.04267	3.01347	3.49987	3.38011	1.96568	1.58467	2.84323	2.55139	3.83503	1.90615
23609115	Open Sea	chr7:135195632-135195633	-0.229574	0.0146955	4.27497	2.20945	5.68468	5.43865	3.83317	5.72891	-0.0412019	2.13769	5.63891	4.13392
23716885	Open Sea	chr7:140373680-140373681	-0.200539	0.0273597	0.118697	0.126282	3.59352	0.728161	1.19154	-0.0975527	2.78383	2.09738	2.61476	1.36365
23772657	Open Sea	chr7:143582677-143582678	-0.266198	0.00218676	1.08635	3.88294	3.18253	2.18279	4.42993	3.48111	5.61975	4.46205	7.3612	7.98649
23872013	Open Sea	chr7:149120620-149120621	-0.324983	0.02821	2.84384	2.14096	2.69822	0.741199	1.44425	2.69079	2.81978	1.73718	3.04769	0.741199
23872017	Open Sea	chr7:149120650-149120651	-0.327981	0.00310405	3.4177	2.54685	1.65099	2.26829	2.69268	3.11345	3.10103	2.55276	3.35739	1.75516
23872019	Open Sea	chr7:149120669-149120670	-0.360144	0.024953	3.13048	3.23158	3.45884	1.35415	1.91737	2.92889	3.5266	2.67939	2.39167	2.36796
23939131	Open Sea	chr7:151217961-151217962	-0.346934	0.0216297	4.657	1.58262	4.00794	5.03562	2.52809	2.29736	4.22242	3.37553	1.07906	1.39643
24166201	Shore	chr7:158317091-158317092	0.218349	0.00948178	-1.91579	-2.42195	-0.566028	-1.61018	-4.22966	-2.57022	-1.76153	-1.86964	-3.50374	-3.71547
24203811	Open Sea	chr8:356296-356297	-0.277044	0.0224787	2.46488	3.03796	4.10995	3.13731	3.82124	3.78182	5.16431	3.24231	3.92658	3.59652
24259899	Open Sea	chr8:1649834-1649835	-0.25467	0.0424927	1.05963	1.69541	2.7153	2.2114	-0.158944	2.2888	1.64425	1.53058	2.00772	2.39811
24442441	Open Sea	chr8:8859974-8859975	-0.232739	0.00339818	2.14719	1.86367	3.63253	2.18669	2.55412	2.48837	1.40004	1.30028	2.18669	1.56508
24442445	Open Sea	chr8:8860050-8860051	-0.259724	0.00721827	3.89695	2.67491	4.26183	4.35417	4.48452	5.83258	2.5541	2.94996	4.62435	1.75373
24621907	Open Sea	chr8:17433588-17433589	-0.215109	0.0409589	4.94638	0.0418703	3.22558	0.302413	4.83221	1.44324	7.8996	3.61598	1.20875	4.18285
24724143	Open Sea	chr8:22223849-22223850	-0.216885	0.0236145	1.51448	1.97246	3.74595	3.43503	1.6403	1.47181	2.78209	1.64764	2.1074	1.97246
25047791	Open Sea	chr8:38964758-38964759	-0.250224	0.00023309	3.34797	1.51748	4.99881	3.04083	3.38074	3.87131	3.66607	3.88198	5.18173	3.18988
25047793	Open Sea	chr8:38964784-38964785	-0.281234	0.00149937	2.74727	1.36873	4.63872	3.8201	4.32087	3.07522	3.8201	3.37628	2.84364	1.46225
25047795	Open Sea	chr8:38964788-38964789	-0.264742	0.000584082	5.05091	2.89145	7.79948	5.71809	9.07476	4.75109	4.01154	6.23626	8.41992	3.48424
25138869	Open Sea	chr8:43132507-43132508	-0.277437	0.0215004	4.21707	4.75143	2.87974	5.74598	5.32201	1.77532	6.25679	3.75427	2.56419	0.155715
25193177	Open Sea	chr8:48920701-48920702	-0.234078	0.0122714	1.85584	1.7951	3.89945	1.85584	1.24119	2.10127	3.5261	3.66114	5.96724	3.03787
25193183	Open Sea	chr8:48920728-48920729	-0.201292	0.0345552	3.0555	2.84254	1.88422	1.6296	1.18146	1.9012	1.1129	1.81009	3.0555	2.22872
25466317	Open Sea	chr8:66555811-66555812	-0.301896	0.0158108	1.24009	2.43885	4.9776	4.54701	4.48287	1.12435	4.2624	2.83484	3.7332	1.098
25479207	Shelf	chr8:67340531-67340532	-0.222428	0.0352092	7.73712	3.14302	-0.232243	5.46351	5.34551	4.54937	0.644026	3.54758	6.09637	2.68865
25479209	Shelf	chr8:67340533-67340534	-0.283649	0.00365549	5.24321	2.29021	1.02345	3.88911	3.2821	4.37525	0.834505	3.16993	5.22404	3.47973
25489205	Open Sea	chr8:67782787-67782788	-0.261827	0.00340036	4.63543	1.97202	3.70548	4.57073	4.71755	2.38344	3.24297	2.71384	3.17854	3.04381
25532791	Open Sea	chr8:70623557-70623558	-0.231129	0.0445831	0.482802	0.476002	3.50738	1.43753	1.5884	1.24343	0.0517394	1.93243	3.49386	2.51389
25697751	Open Sea	chr8:82192301-82192302	-0.289249	0.00062576	1.87494	1.35584	2.62229	2.48571	3.23853	1.63893	2.91557	1.58751	3.65248	1.82624
25697753	Open Sea	chr8:82192327-82192328	-0.246478	0.0269993	2.11912	2.65456	5.34855	3.1665	2.77233	5.06354	0.748069	2.41943	5.1105	2.6816
25819151	Open Sea	chr8:91998203-91998204	-0.231061	0.0107975	1.37653	1.88126	3.07842	3.35828	2.73637	1.53921	2.97782	2.00065	1.98387	0.427558
25819153	Open Sea	chr8:91998224-91998225	-0.212104	0.0163419	0.85859	1.36496	3.37846	1.81631	2.2655	2.40588	2.17192	2.07142	1.35498	0.749482
25861585	Open Sea	chr8:95132310-95132311	-0.365069	0.0328169	1.3137	1.91731	1.95023	1.41979	2.88514	1.97472	1.27551	2.03298	1.97472	2.80711
25861593	Open Sea	chr8:95132420-95132421	-0.342948	0.0267596	1.56888	2.11989	2.54782	0.382856	3.37734	2.69595	2.0361	2.35031	2.77571	2.69595
25867143	Open Sea	chr8:95487769-95487770	-0.236775	0.0115544	3.31683	4.20171	3.89441	3.821	3.07027	5.3587	3.88589	3.02228	1.72347	0.220511
25867145	Open Sea	chr8:95487775-95487776	-0.249848	0.00550477	3.79624	4.04933	4.55549	3.07695	4.44355	5.07654	4.17587	2.73591	2.34435	1.05597
25916059	Open Sea	chr8:98290506-98290507	-0.317486	0.0368315	2.29694	2.24135	2.44738	2.47131	2.03055	2.17799	1.95595	3.00734	4.14397	4.45477
25916061	Open Sea	chr8:98290510-98290511	-0.348934	0.0189455	3.38176	3.34895	1.89411	3.67054	3.67054	2.65981	2.29884	3.20128	4.74073	6.36582
25962441	Open Sea	chr8:100906188-100906189	-0.20806	0.00050476	5.437	4.79137	7.82417	3.32103	7.45366	5.99705	5.93191	5.51734	6.82793	2.27491
25962449	Open Sea	chr8:100906357-100906358	-0.2281	0.00165248	3.03584	2.60186	3.55165	5.57968	4.20931	2.72097	2.83491	3.26691	3.75328	2.90487
26029195	Open Sea	chr8:104310339-104310340	-0.21026	0.0163483	2.08219	0.00858061	3.66501	0.324643	2.66126	2.05083	3.06546	1.63751	-0.0676915	2.52793
26029199	Open Sea	chr8:104310551-104310552	-0.218306	0.00397978	0.93166	1.38714	3.15483	2.85566	2.75357	2.59591	2.91383	1.5909	0.214703	1.7667
26110103	Open Sea	chr8:110658013-110658014	-0.233518	0.033648	4.69045	4.01614	3.08541	1.8232	3.15184	2.4543	3.12366	3.88293	0.981722	1.37441
26906967	Island11483	chr9:5304455-5304456	-0.316256	0.198035	5.98745	6.16175	5.27282	4.7964	2.27137	9.56061	5.27282	6.84846	13.8484	9.56061
26906969	Island11483	chr9:5304457-5304458	-0.227414	0.265264	3.29812	6.12508	5.65392	6.02589	4.12958	10.6161	7.42077	7.58139	10.1514	3.88707
26906971	Island11483	chr9:5304459-5304460	-0.278796	0.000130017	5.25288	6.88902	6.45846	6.07095	2.95599	8.8139	6.64841	7.25669	11.5129	10.2576
26906973	Island11483	chr9:5304469-5304470	-0.287965	0.564135	6.57468	5.83552	5.4213	4.86117	4.22963	8.38622	8.73902	6.91681	9.0332	8.16549
26906975	Island11483	chr9:5304471-5304472	-0.311003	0.16866	4.62197	4.83307	8.33128	6.05744	3.82798	10.9549	7.0885	7.03219	13.9103	10.9549
26906977	Island11483	chr9:5304475-5304476	-0.319771	0.000432916	5.57783	9.07187	12.4696	2.80582	4.66885	9.48527	7.04516	5.2591	12.751	7.97424
26906979	Open Sea	chr9:5304509-5304510	-0.369526	6.8199e-05	5.66485	4.98766	7.98271	4.09885	4.02514	4.99445	5.66485	5.36433	8.47306	6.10061
26906981	Open Sea	chr9:5304511-5304512	-0.38497	0.000130017	5.44546	5.61868	9.86257	4.02722	4.99326	5.43416	6.67965	5.38928	9.47676	7.31623
26906983	Open Sea	chr9:5304573-5304574	-0.314118	0.000134519	2.59801	2.67544	4.01757	3.17874	3.01097	3.58138	3.22622	3.52718	4.38229	4.08468
26906985	Open Sea	chr9:5304606-5304607	-0.395282	0.000428828	4.09577	3.46221	6.12983	3.9707	3.51589	4.39199	4.50589	4.28795	8.11593	4.97127
26906987	Open Sea	chr9:5304611-5304612	-0.399815	1.69498e-05	7.3383	5.24425	9.30545	6.94487	6.4763	7.9444	7.77011	8.40618	11.104	6.60765
26906989	Open Sea	chr9:5304673-5304674	-0.333356	0.00181581	3.11374	2.75371	3.25775	2.32618	2.58152	3.44534	4.50474	3.59624	5.01975	5.55677
26907553	Open Sea	chr9:5339798-5339799	-0.235863	0.0192966	2.7026	0.451954	3.04172	2.54549	2.82388	2.29748	2.38444	2.62601	3.44929	2.18063
26932313	Open Sea	chr9:6715825-6715826	-0.267894	0.011604	3.0195	0.74609	2.76282	0.623864	2.5875	4.00069	2.90542	3.12604	0.980357	3.77241
26932321	Open Sea	chr9:6715883-6715884	-0.214725	0.0381838	1.16691	1.2056	3.10136	1.11647	2.25413	5.37016	2.61062	1.8195	2.16076	4.07752
26932325	Open Sea	chr9:6715934-6715935	-0.233918	0.0479477	1.73606	2.17901	3.67326	1.01439	4.27768	3.75009	4.70797	4.38769	1.3109	4.54446
26932327	Open Sea	chr9:6715941-6715942	-0.276896	0.0230794	5.05826	2.24602	4.89311	0.918826	3.58962	4.14826	4.25916	3.72297	0.882365	3.55038
27312155	Open Sea	chr9:33751249-33751250	-0.276236	0.0410897	2.20261	3.05014	3.01818	-0.489318	2.0861	3.62571	2.64535	2.68666	2.74328	4.76131
27513875	Open Sea	chr9:43134879-43134880	-0.284431	0.0313502	6.33017	4.15721	4.2639	5.38981	3.95593	6.37641	3.72649	7.7152	5.95285	3.39083
27513879	Open Sea	chr9:43134952-43134953	-0.311349	0.0140687	5.34081	3.65122	5.62523	5.35956	1.61141	5.39572	4.83279	7.08938	4.78966	3.8772
27513881	Open Sea	chr9:43134977-43134978	-0.312785	0.00576522	5.86005	4.32245	4.07701	5.62474	3.99304	7.43564	5.25875	6.60298	5.90301	1.9369
27513883	Open Sea	chr9:43134983-43134984	-0.346052	0.00357042	5.00339	4.57928	4.67651	4.94407	3.52766	7.00158	4.84676	6.8883	5.89693	2.7089
27513889	Open Sea	chr9:43135044-43135045	-0.447416	0.00782498	5.41193	4.57812	4.82019	7.00086	3.1699	7.48301	7.26111	5.85574	4.48304	1.79576
27656199	Open Sea	chr9:70648598-70648599	-0.325657	0.013633	1.91711	1.58322	1.64898	1.70644	1.44521	1.91711	1.64898	1.81362	1.91711	1.91711
27762253	Open Sea	chr9:77502715-77502716	-0.298177	0.00101502	4.01822	2.11578	3.23638	1.85654	3.73206	6.16307	3.76695	2.86441	4.79938	5.54037
27762257	Open Sea	chr9:77502747-77502748	-0.284792	0.00167529	5.29832	3.56022	3.05271	3.69179	3.18335	5.64055	4.98688	3.41862	2.81136	4.16124
28049511	Open Sea	chr9:93880655-93880656	-0.212161	0.00742044	0.407434	0.894491	3.16192	1.6599	1.42094	2.8069	2.18561	2.74813	2.78748	3.91441
28269849	Open Sea	chr9:103173783-103173784	-0.341053	0.00130987	8.50293	2.56076	7.998	4.91235	3.81102	3.92495	2.93754	3.46922	4.41865	3.3325
28323743	Open Sea	chr9:107527498-107527499	-0.220262	0.00225877	1.35614	0.458097	1.34346	1.1152	1.78242	2.39076	2.3199	1.63563	3.62604	4.72929
28725593	Open Sea	chr9:128511001-128511002	-0.260217	0.00168811	2.78839	1.27048	3.66263	3.14919	3.68467	2.30804	3.40627	3.00372	6.67501	3.18091
29088875	Shore	chr9:137978546-137978547	-0.294655	0.0252541	1.04101	1.30127	3.9038	1.90185	1.60156	2.69548	3.34612	1.91124	3.47005	2.89171
29267219	Open Sea	chr10:119570-119571	-0.290995	0.0404591	4.37973	2.58964	2.82185	3.84467	2.92006	4.6045	3.08066	3.23158	5.58219	1.84775
29267221	Open Sea	chr10:119578-119579	-0.302771	0.0142923	3.59902	3.22017	2.53567	5.47051	1.4139	3.49619	2.51931	3.37408	5.50438	1.38424
29886077	Open Sea	chr10:27703406-27703407	-0.261658	1.69498e-05	3.12833	2.54684	3.53294	3.91542	3.87029	3.2267	3.30465	3.23535	3.00713	2.63559
29934473	Open Sea	chr10:30026182-30026183	-0.270536	0.000414842	2.63001	1.67256	2.68183	2.3573	2.47939	2.54169	1.22034	2.77948	3.7095	3.2777
29934481	Open Sea	chr10:30026218-30026219	-0.222482	0.0398154	1.50787	2.09515	3.71017	1.76889	3.46057	3.15552	1.92736	3.10305	2.40277	-0.212009
29958943	Open Sea	chr10:31074504-31074505	-0.226001	0.00521219	1.17738	1.44063	2.4483	1.00666	1.66741	0.826458	2.47603	2.52553	0.384136	3.86222
30051697	Open Sea	chr10:35896469-35896470	-0.20161	0.0302705	0.45	5.72587	5.25406	4.42675	2.50147	6.87435	6.075	4.62857	4.23409	2.025
30276723	Open Sea	chr10:50649614-50649615	-0.267177	0.0292291	0.749274	1.53931	5.18368	4.59792	1.72605	4.00083	3.68129	1.46151	5.3312	1.93946
30276725	Open Sea	chr10:50649650-50649651	-0.282408	0.0219567	0.305443	3.30472	4.4964	3.20118	1.46887	3.27702	2.62082	0.957867	4.46878	2.45983
30276727	Open Sea	chr10:50649666-50649667	-0.2935	0.0308629	1.87079	3.58752	3.22192	3.04488	1.69064	3.40682	2.29376	0.970042	3.74159	2.84361
30276731	Open Sea	chr10:50649672-50649673	-0.28482	0.046454	2.3649	3.93291	4.51149	3.62985	1.47324	3.64007	2.98795	0.772109	3.00819	1.64053
30276741	Open Sea	chr10:50649742-50649743	-0.29068	0.00974693	2.6522	2.8309	3.50525	4.09211	2.28661	2.58303	3.5828	0.960026	4.49224	1.09259
30276743	Open Sea	chr10:50649757-50649758	-0.288402	0.0158414	1.62768	3.0473	3.71966	3.93508	2.7301	3.0473	3.84618	1.52241	3.70315	2.3988
30276745	Open Sea	chr10:50649770-50649771	-0.274695	0.0135917	1.70567	2.82909	4.27578	5.24444	1.9746	3.00669	3.18016	1.34552	2.82909	1.84457
30276747	Open Sea	chr10:50649777-50649778	-0.315319	0.00452687	1.84467	2.19737	3.24521	4.34659	2.6216	2.79936	3.86469	1.99874	3.70145	2.97666
30276749	Open Sea	chr10:50649781-50649782	-0.299274	0.00546145	1.31218	2.54801	4.07073	4.26934	2.28828	3.29833	3.29833	1.60405	3.86007	2.13974
30276751	Open Sea	chr10:50649786-50649787	-0.320169	0.00418236	2.20209	2.24501	3.56105	4.77301	2.19365	3.19723	3.47128	2.16955	3.41704	1.71677
30276753	Open Sea	chr10:50649795-50649796	-0.30704	0.000997507	1.95889	1.8519	3.99659	4.68634	3.00436	3.51771	2.53255	1.6108	4.17749	2.40826
30276755	Open Sea	chr10:50649836-50649837	-0.31963	0.0050422	0.809098	1.33951	5.50901	5.33053	2.01508	3.75993	3.36014	1.56108	3.85665	3.23079
30276757	Open Sea	chr10:50649838-50649839	-0.337745	0.00564687	0.734806	1.74503	5.45226	5.41462	2.63213	3.74457	3.02035	1.95104	4.40296	3.08618
30276759	Open Sea	chr10:50649875-50649876	-0.350029	0.00693592	0.0809891	1.17449	3.88569	5.21523	2.33514	3.24289	3.05148	1.64963	4.51136	3.32955
30299025	Open Sea	chr10:51784536-51784537	-0.365084	0.0119492	2.05406	2.69609	4.45854	2.93859	3.01524	4.17608	3.62448	3.67569	2.92325	4.01546
30299031	Island13042	chr10:51784595-51784596	-0.33688	0.00703996	2.60808	2.69811	7.5371	2.09023	4.90409	3.45437	4.10581	5.54551	4.51188	5.33052
30299033	Island13042	chr10:51784605-51784606	-0.288407	0.0222196	2.42831	2.22158	5.62929	2.11643	3.6328	3.41416	3.74198	3.8963	6.25522	3.4098
30299035	Island13042	chr10:51784621-51784622	-0.268936	0.0404756	4.23942	2.48605	4.14734	0.733584	4.21751	3.94331	2.16078	3.21898	6.02125	4.61322
30299037	Island13042	chr10:51784624-51784625	-0.285856	0.00885255	4.15291	4.49847	5.78007	1.82153	3.66636	6.20223	2.85938	3.55598	5.67337	3.24063
30299039	Island13042	chr10:51784633-51784634	-0.27611	0.00807441	3.41277	4.11475	2.89458	1.9702	3.3691	4.6725	2.7476	4.30203	5.6493	2.93357
30299041	Island13042	chr10:51784644-51784645	-0.246363	0.0277382	1.25446	2.99667	6.73692	3.25792	3.60369	6.68679	5.94151	4.03282	6.89609	0.691298
30299043	Island13042	chr10:51784648-51784649	-0.246404	0.0559012	2.76675	2.34929	4.79646	3.39452	3.35392	5.05749	1.63396	2.96181	6.01064	5.20199
30299045	Island13042	chr10:51784720-51784721	-0.315632	0.00316823	4.2621	4.67947	4.78746	2.34257	3.52523	6.76087	6.33293	5.19622	7.20674	5.49711
30299047	Island13042	chr10:51784725-51784726	-0.239727	0.0264726	3.25065	3.75268	3.36712	1.26471	3.77327	6.57728	2.22035	5.72616	5.42289	3.73594
30299049	Island13042	chr10:51784731-51784732	-0.277651	0.0280549	5.09789	3.31042	5.02676	1.9622	3.79857	6.70321	0.74307	5.85184	7.27793	3.54562
30299051	Island13042	chr10:51784733-51784734	-0.1973	0.172121	4.04821	2.09271	2.89061	-0.0178263	2.04634	5.95323	2.26276	3.71533	6.72343	1.33252
30299053	Island13042	chr10:51784739-51784740	-0.263191	0.0733588	3.74218	4.11014	3.2692	1.25313	2.71895	5.9926	5.24466	4.16203	7.12901	2.49744
30299055	Island13042	chr10:51784741-51784742	-0.24163	0.36474	3.48389	1.85367	3.14542	1.56273	3.11273	5.1936	4.2264	5.02901	8.35121	3.19197
30299057	Island13042	chr10:51784749-51784750	-0.299708	0.0113235	3.28036	3.58601	4.99751	1.86012	2.75901	6.97027	4.28574	4.45127	6.97669	4.07056
30299059	Island13042	chr10:51784758-51784759	-0.293597	0.0367671	2.35923	4.27904	3.1138	2.31753	3.7087	4.92529	4.78061	4.39212	4.89923	1.38635
30299061	Island13042	chr10:51784767-51784768	-0.27007	0.0646705	1.66932	3.13507	3.50557	2.93388	3.06955	0.355579	5.32391	4.07306	6.3968	4.51096
30299063	Island13042	chr10:51784798-51784799	-0.227364	0.226348	3.53274	2.57754	2.56688	0.881752	2.36863	4.67328	2.68724	2.66357	-0.0661314	3.86902
30299065	Island13042	chr10:51784800-51784801	-0.315807	0.0360971	2.77969	3.27113	2.49631	-0.14859	3.62984	5.2968	3.76808	4.10215	6.46367	5.35478
30299067	Island13042	chr10:51784805-51784806	-0.352868	0.00449916	2.57634	6.82641	3.2447	3.95308	5.49325	8.8948	4.74074	5.73218	8.76376	3.30721
30299069	Island13042	chr10:51784809-51784810	-0.31708	0.00218676	2.45452	3.63003	4.16495	2.03405	3.55917	4.55621	3.30855	3.71195	5.35702	2.59744
30299073	Open Sea	chr10:51784846-51784847	-0.312008	0.00390711	1.3257	4.20962	2.58096	3.2386	3.79699	5.55627	2.44512	3.76283	4.54826	2.90358
30537675	Open Sea	chr10:69990520-69990521	-0.209832	0.0298816	1.66	2.13076	3.03494	1.66	1.48813	2.64433	0.555128	1.76667	2.79975	-0.70572
30809459	Open Sea	chr10:81742542-81742543	-0.20325	0.0359891	4.63829	1.46381	5.88123	6.64308	3.81977	4.67419	3.92891	3.25511	3.55473	1.11899
30931337	Open Sea	chr10:89167415-89167416	-0.275557	0.02884	1.67048	1.28787	3.51494	3.76718	3.84306	2.46547	4.05691	3.79568	2.77688	2.47541
30931339	Open Sea	chr10:89167424-89167425	-0.291343	0.00714665	2.56289	1.35257	2.57946	2.64085	3.24537	1.85625	3.20699	3.11775	2.56772	2.84276
30931341	Open Sea	chr10:89167457-89167458	-0.311487	0.0107323	3.57475	1.47755	3.59332	3.04863	4.33729	2.28789	4.26003	3.99181	2.81408	2.30587
30931343	Open Sea	chr10:89167468-89167469	-0.302121	0.00977302	3.51118	1.49753	3.51262	2.66572	3.58867	2.04452	3.90014	3.54702	3.10184	2.51986
30931345	Open Sea	chr10:89167515-89167516	-0.285965	0.00180466	2.95736	1.86486	2.57125	3.01456	3.19617	2.12793	3.35937	2.96831	2.36125	2.18008
30931347	Open Sea	chr10:89167525-89167526	-0.347266	0.00735682	3.63643	1.43424	3.67407	2.873	3.38685	1.89342	3.51059	3.41545	3.27162	3.23269
30931349	Open Sea	chr10:89167539-89167540	-0.363175	0.0169999	3.34883	1.85701	4.11201	2.71148	3.91872	2.2624	3.17135	3.0401	3.34238	2.34358
30931351	Open Sea	chr10:89167541-89167542	-0.37449	0.0128337	3.5427	1.71981	3.7886	2.85163	3.91637	2.63869	3.54651	2.98504	3.16137	2.71535
30931353	Open Sea	chr10:89167545-89167546	-0.376379	0.013812	4.95468	1.00461	4.82001	3.54062	4.21398	2.39591	3.67926	3.86313	4.0864	3.05042
30931355	Open Sea	chr10:89167548-89167549	-0.374827	0.0310478	3.92044	1.43168	3.93089	2.61598	3.36898	2.23326	3.12559	2.98969	4.09116	2.92741
30931357	Open Sea	chr10:89167552-89167553	-0.374237	0.0192399	3.72377	1.36364	4.06153	2.86403	3.54645	2.20914	4.14469	3.20346	4.20597	3.32972
30965651	Open Sea	chr10:91597985-91597986	-0.255929	0.009897	10.6679	6.12761	5.03164	3.32526	7.87561	6.12047	0.562544	3.64675	5.03164	5.08335
30965655	Open Sea	chr10:91598023-91598024	-0.248643	0.0209079	4.26424	3.66789	6.76892	1.19137	6.68278	5.06896	0.566855	4.40944	4.32896	5.39068
30965661	Open Sea	chr10:91598107-91598108	-0.336427	0.00996632	5.86201	2.94652	5.30373	4.18715	3.83822	4.89684	0.996941	2.93303	3.01655	5.26078
30988951	Open Sea	chr10:93393342-93393343	-0.255631	0.0211659	2.84268	0.0501423	3.84598	2.7932	1.47303	2.56512	2.8796	2.36347	2.32583	0.387639
31172983	Open Sea	chr10:102278894-102278895	-0.367147	0.000714619	1.76685	3.10032	3.10433	3.03719	5.24416	4.90642	3.20098	3.62001	3.97541	3.91231
31172985	Open Sea	chr10:102278918-102278919	-0.246334	0.0168928	0.992048	1.87251	3.13316	2.99967	3.52249	3.26476	1.32665	1.91221	2.54656	0.960679
31172991	Open Sea	chr10:102279052-102279053	-0.271628	0.028056	1.84649	3.23135	1.79218	0	3.27332	3.46217	5.70239	2.76973	3.74728	4.84703
31172993	Open Sea	chr10:102279081-102279082	-0.283077	0.0056969	3.886	2.99898	3.43264	2.81224	5.58613	4.33937	7.96631	3.16255	2.18588	3.13039
31172995	Open Sea	chr10:102279093-102279094	-0.334428	0.00467295	2.18966	3.49615	3.99797	1.49257	5.55073	4.55768	6.73435	3.47252	3.85804	3.62482
31172997	Open Sea	chr10:102279142-102279143	-0.217113	0.00232187	2.17449	8.84968	4.37826	3.72529	12.9009	5.14411	11.7701	7.2146	8.3777	7.10057
31172999	Island13355	chr10:102279163-102279164	-0.195931	0.994561	1.68888	8.39434	1.56487	3.733	8.615	5.51215	6.14139	3.78767	7.94768	7.01374
31173001	Island13355	chr10:102279169-102279170	-0.221949	0.429621	0.771858	5.68224	3.97579	2.93748	9.58268	4.32622	9.58268	2.93381	7.60378	4.64862
31173003	Island13355	chr10:102279172-102279173	-0.230391	0.0139424	3.10607	7.88779	2.77761	3.00028	10.0085	4.18026	6.58356	2.89569	7.94059	2.07104
31173005	Island13355	chr10:102279177-102279178	-0.268552	0.00995205	2.10939	7.2772	2.84309	3.49956	10.5136	5.49571	11.7142	6.05008	9.65604	1.7833
31173007	Island13355	chr10:102279179-102279180	-0.244018	0.91607	1.597	5.15878	2.15428	2.3596	7.50821	3.82614	7.3725	4.39213	5.62912	1.96852
31173009	Island13355	chr10:102279182-102279183	-0.327535	0.0040356	1.64373	6.5771	4.84942	2.37433	9.28582	5.09568	8.1804	5.45779	6.66396	3.55332
31173011	Island13355	chr10:102279184-102279185	-0.285047	0.00712535	3.56839	7.25006	2.8451	2.13686	11.1484	4.37017	7.68945	3.51793	6.07467	2.97502
31173013	Island13355	chr10:102279212-102279213	-0.386625	0.000902323	2.09163	7.42191	5.48362	3.15768	9.96013	5.92943	9.14135	5.80444	7.57868	6.47007
31173015	Island13355	chr10:102279225-102279226	-0.330711	0.00495103	3.9742	6.6486	7.01329	1.61046	10.2584	6.13903	9.15853	5.76435	6.73701	4.81257
31173017	Island13355	chr10:102279230-102279231	-0.366269	0.00115484	3.13578	6.44706	4.91941	1.81711	8.45934	6.19042	7.50743	5.22076	7.21089	4.91941
31173019	Island13355	chr10:102279236-102279237	-0.37947	0.00197597	3.60687	5.9864	4.41327	0.666863	6.15345	5.19677	5.72368	5.12949	6.34108	7.13488
31173021	Island13355	chr10:102279240-102279241	-0.384	0.000433114	3.6621	5.11886	6.43247	1.94711	8.27938	6.90739	6.70385	5.29878	6.43247	5.70182
31173023	Island13355	chr10:102279246-102279247	-0.331182	0.00328675	3.02857	4.7211	3.94453	1.35519	7.69643	6.25138	8.7533	4.27209	5.11029	2.86501
31173025	Island13355	chr10:102279271-102279272	-0.390566	0.000645295	1.49706	4.26141	4.56604	2.18435	5.82746	5.26893	4.7906	4.28281	4.46901	4.19178
31173027	Island13355	chr10:102279283-102279284	-0.359735	0.000647997	1.61277	4.6756	3.76136	2.26443	6.46164	5.24118	4.17327	4.88963	5.08862	4.01484
31173029	Island13355	chr10:102279316-102279317	-0.214703	0.153429	1.90661	7.20273	4.17638	1.55353	13.1573	6.58646	4.59541	3.21506	6.75675	5.41878
31173031	Island13355	chr10:102279330-102279331	-0.17308	0.159373	3.14078	4.31857	1.88447	0.241599	8.12551	4.79911	8.41729	2.40538	6.02291	2.38699
31173033	Island13355	chr10:102279334-102279335	-0.258891	0.383316	2.20047	4.88361	3.26892	1.31784	8.58795	4.59732	8.12952	4.89071	4.45487	1.58563
31173035	Island13355	chr10:102279352-102279353	-0.224456	0.438316	3.60626	7.12279	3.60626	0	9.74967	4.42678	10.7175	5.99945	8.92013	2.00729
31173125	Island13355	chr10:102279703-102279704	-0.262681	0.36615	-1.28328	3.33654	3.72907	1.35661	6.18632	3.55653	2.64622	3.44542	2.35658	-0.443316
31173127	Island13355	chr10:102279722-102279723	-0.165855	0.831114	0.319768	1.91977	2.07454	-1.33024	6.00312	4.47916	4.47916	3.16865	0.258657	4.62812
31173129	Island13355	chr10:102279729-102279730	-0.278311	0.158193	1.86269	3.31558	0.755719	3.41244	5.73708	2.38625	4.88956	4.30524	3.21872	3.27156
31200563	Open Sea	chr10:103070540-103070541	-0.23954	0.0128609	0.698829	2.86406	8.14155	1.21523	1.73504	1.57489	6.71951	3.14318	2.95659	3.68489
31449289	Open Sea	chr10:116391369-116391370	-0.279128	0.000920289	3.18663	0.984636	5.71785	1.71761	2.21984	1.75426	1.96416	2.39562	2.39562	4.14416
32221215	Open Sea	chr11:8106708-8106709	0.24175	0.00932911	-2.07121	-1.45725	-1.31593	-1.75679	-0.610641	-2.40527	-1.1461	-2.03862	-2.93585	-1.55726
32406111	Open Sea	chr11:18230955-18230956	-0.233941	0.0255022	2.0447	3.4966	2.27824	2.79468	4.17701	3.26517	4.42875	2.40841	5.15856	0.660764
32406113	Open Sea	chr11:18230961-18230962	-0.255496	0.0266696	2.25342	1.88012	3.65327	3.79325	1.74014	4.02814	5.00546	3.89904	3.4187	1.56905
32410823	Open Sea	chr11:18433884-18433885	-0.219544	0.0441303	3.63509	4.93683	0.03814	3.52211	1.74109	3.95941	5.86403	4.22732	2.61985	4.45237
32417473	Open Sea	chr11:18719942-18719943	-0.225578	0.00397978	4.11946	6.61724	8.04465	5.58204	5.98742	4.76013	4.21964	5.77702	2.85129	6.41556
32772233	Open Sea	chr11:44037906-44037907	0.207484	0.00994807	-1.97785	-1.85243	-3.09577	-1.67536	-1.65645	-2.3948	-3.26345	-1.03333	-3.54293	-1.46361
33356663	Open Sea	chr11:69490428-69490429	-0.226961	0.0200058	3.39576	3.65183	9.10967	3.245	3.04748	4.248	3.58079	2.73222	3.00515	2.13674
33356665	Open Sea	chr11:69490456-69490457	-0.208828	0.00839887	0.133663	4.2298	7.75247	2.49187	1.55584	4.7973	2.35582	1.98456	2.52388	3.55661
33356667	Open Sea	chr11:69490461-69490462	-0.21636	0.0341694	1.18209	1.99798	5.00832	1.61137	1.52427	3.10405	1.94526	0.416405	1.24713	2.61304
33356669	Open Sea	chr11:69490463-69490464	-0.21467	0.0199023	1.25599	1.59854	4.86015	1.55743	1.79428	2.70522	1.67466	0.776432	0.667246	3.43745
33356671	Open Sea	chr11:69490465-69490466	-0.249947	0.0127484	1.49993	3.76716	6.86888	1.89763	3.42626	3.90129	2.7899	1.72046	2.66381	2.94421
33356675	Open Sea	chr11:69490488-69490489	-0.222589	0.0186108	1.26452	2.20201	6.88947	2.79228	3.78186	3.60424	2.51451	3.62164	0.213396	1.70569
33677329	Open Sea	chr11:85394069-85394070	-0.290132	0.0497331	2.65207	2.91573	6.14163	2.14957	4.93192	4.53643	3.41977	1.64582	4.7159	2.32148
33733043	Island14877	chr11:89597175-89597176	-0.145838	0.142716	2.18244	1.10391	2.67845	5.36516	4.52077	18.7987	5.90251	5.68467	0.720985	6.54732
33733045	Island14877	chr11:89597192-89597193	-0.160405	0.392225	3.5981	1.04293	0	10.5826	19.4492	33.5823	24.8145	10.0747	3.99789	14.3924
33733047	Island14877	chr11:89597212-89597213	-0.111057	0.323615	8.15217	4.68515	0	4.85248	21.1495	35.7551	24.2624	11.9417	0	10.5416
33733049	Island14877	chr11:89597220-89597221	-0.132645	0.0558002	6.83566	1.35989	10.1347	11.9675	14.7818	30.4257	32.6661	11.7241	5.98035	17.7188
33733051	Island14877	chr11:89597222-89597223	-0.156441	0.192351	1.05452	-0.526774	6.40927	12.2707	14.2839	25.7352	12.709	9.2782	5.49824	10.4253
33733053	Island14877	chr11:89597238-89597239	-0.159906	0.211721	3.11345	2.76235	4.04135	17.5475	15.3463	28.2286	19.2314	12.8888	6.25128	9.82526
33733055	Island14877	chr11:89597255-89597256	-0.180368	0.22668	3.63285	1.11267	5.01974	9.27847	13.187	23.6965	13.1032	9.07411	5.39971	4.41052
33733057	Island14877	chr11:89597262-89597263	-0.225238	0.0795484	8.46344	4.23137	8.3669	15.2235	20.2857	30.1598	19.4363	22.1172	8.85209	9.80705
33733059	Island14877	chr11:89597267-89597268	-0.186519	0.119597	3.97996	1.53282	7.23553	12.9944	15.7662	27.0618	17.4551	13.7268	9.68098	7.02346
33733061	Island14877	chr11:89597271-89597272	-0.197269	0.0853543	3.67051	3.48221	5.34196	13.3218	14.255	24.1272	16.5697	15.0785	2.36249	8.91279
33733063	Island14877	chr11:89597280-89597281	-0.169398	0.191295	7.35212	4.4499	5.36969	17.3242	21.4723	34.0441	21.8733	20.0611	7.62855	1.36581
33733065	Island14877	chr11:89597302-89597303	-0.154051	0.245023	1.94124	1.56577	5.61224	21.1516	14.6765	29.7308	21.8499	11.9638	5.69949	5.00062
33733067	Island14877	chr11:89597304-89597305	-0.150641	0.332652	5.79045	1.222	4.15605	18.1113	10.1489	26.7796	14.4125	11.6464	2.69369	6.63401
33733069	Island14877	chr11:89597307-89597308	-0.17458	0.252904	9.19344	0.132028	5.07284	12.8927	11.6761	27.5924	15.6923	13.302	4.79534	6.13692
33733071	Island14877	chr11:89597325-89597326	-0.132676	0.0453533	10.0931	0.538697	0.0503379	10.7014	12.157	29.9972	17.9402	14.3099	8.25724	11.4221
33733073	Island14877	chr11:89597343-89597344	-0.150399	0.160252	12.7271	2.21486	3.1292	14.287	12.5188	22.7249	15.547	12.8697	5.5718	6.12597
33733075	Island14877	chr11:89597350-89597351	-0.124529	0.341855	1.33895	1.72542	3.62198	11.706	10.6565	27.3278	12.289	14.767	7.5632	7.47881
33733077	Island14877	chr11:89597363-89597364	-0.094899	0.306189	1.12711	2.25288	0.619041	11.0953	6.59333	24.0841	12.4706	4.99298	4.57066	4.23379
33733079	Island14877	chr11:89597387-89597388	-0.104177	0.171552	5.04949	-0.323537	2.80712	8.37153	7.68251	21.3345	5.4119	11.4125	4.72627	6.82125
33733081	Island14877	chr11:89597397-89597398	-0.0649959	0.207082	10.6087	1.23136	0	4.59709	9.71216	26.2691	6.41454	16.4182	10.6087	10.6087
33733083	Island14877	chr11:89597399-89597400	-0.0991937	0.195586	3.96573	0.356949	7.07042	8.41063	10.247	27.3378	7.52235	12.0494	4.08072	6.32299
33733085	Island14877	chr11:89597408-89597409	-0.147936	0.242888	7.52603	2.4892	2.98923	7.19437	10.2898	14.1591	6.51488	11.961	2.70545	9.18431
33733087	Island14877	chr11:89597411-89597412	-0.10677	0.371747	3.47797	-0.609542	3.32373	16.7624	8.97498	22.553	6.51741	13.288	1.00645	1.49615
33733089	Island14877	chr11:89597457-89597458	-0.141637	0.434216	2.62248	0.929485	0.509518	10.2907	8.97732	15.6021	3.0614	10.2907	1.87512	3.82474
33733091	Island14877	chr11:89597462-89597463	-0.16617	0.790638	8.54438	-0.218806	1.98706	5.82571	8.11637	18.297	3.62489	11.6514	4.7253	5.56161
33733093	Island14877	chr11:89597470-89597471	-0.235909	0.389587	7.25218	1.73984	2.5204	13.4438	8.91137	23.0751	4.55329	13.9077	8.02613	3.33084
33733095	Island14877	chr11:89597477-89597478	-0.170327	0.798086	8.1126	0.524232	1.75713	8.97019	10.1708	20.5147	4.30109	10.2916	6.33724	-1.03502
33733097	Island14877	chr11:89597481-89597482	-0.160469	0.602577	6.47737	0.397935	0.583443	3.61005	6.34212	13.1147	2.42573	8.77663	2.40888	3.13217
33733099	Island14877	chr11:89597486-89597487	-0.174544	0.304092	10.1336	0.44786	4.88713	10.2701	9.70082	20.3283	10.0726	13.1939	6.16356	1.8093
33733101	Island14877	chr11:89597488-89597489	-0.22998	0.0131393	4.92064	1.28623	1.87916	10.9969	6.66297	19.8064	6.08727	10.0864	6.43151	1.75457
33733103	Island14877	chr11:89597491-89597492	-0.187525	0.267066	5.56225	2.04622	1.02071	14.123	14.9383	30.5512	16.8279	15.0388	8.99038	4.31463
33733105	Island14877	chr11:89597497-89597498	-0.209569	0.507735	5.18777	1.70622	3.73073	11.7628	10.0335	23.0479	12.4361	11.4164	7.88821	2.83277
33733107	Island14877	chr11:89597508-89597509	-0.247272	0.632889	8.94377	2.45801	3.80581	12.0543	13.9528	30.728	16.8483	15.3469	9.40665	3.15117
33733109	Island14877	chr11:89597539-89597540	-0.223504	0.690271	8.84341	1.89016	5.19085	9.64627	10.8945	16.2229	8.90091	12.8453	7.11681	5.48135
33733111	Island14877	chr11:89597547-89597548	-0.177687	0.27278	8.36268	0.420556	3.57764	10.3197	11.0513	17.254	5.03612	15.2289	7.46585	1.49172
33733113	Island14877	chr11:89597555-89597556	-0.290682	0.0102405	9.7652	1.35796	4.36927	6.60504	11.2119	21.1284	9.5953	14.8929	10.9122	9.97588
33733115	Island14877	chr11:89597565-89597566	-0.16193	0.303829	12.0451	1.73615	2.67176	5.85871	11.1537	14.7221	6.96019	15.4195	8.44507	3.49954
33733117	Island14877	chr11:89597572-89597573	-0.236958	0.0280549	5.16375	0.861629	2.94745	5.80401	6.21623	10.5526	5.89848	7.71447	3.02026	5.85969
33733119	Island14877	chr11:89597606-89597607	-0.214936	0.00045565	13.5212	3.86249	4.55782	10.3261	15.7232	23.3021	11.9911	20.8919	6.96454	8.76296
33733121	Island14877	chr11:89597621-89597622	-0.257028	0.00111168	17.7093	4.31625	6.12426	9.66213	10.4932	15.2412	10.9578	10.8352	3.70998	3.80847
33733123	Island14877	chr11:89597645-89597646	-0.299596	6.68729e-05	17.239	7.08836	3.67985	11.9675	11.3229	20.8775	17.3084	17.5298	6.00461	7.50712
33733125	Island14877	chr11:89597649-89597650	-0.26312	0.206683	20.593	3.59857	5.0362	11.9722	12.947	26.8786	11.9251	19.2576	8.56719	6.78224
33733127	Island14877	chr11:89597672-89597673	-0.142925	0.00953428	7.40718	4.14306	2.94817	5.89286	12.7822	21.7932	10.7937	14.9643	3.61843	2.88449
33733129	Island14877	chr11:89597682-89597683	-0.285801	0.000457389	15.2896	5.69658	5.19736	12.2793	10.7342	22.5556	13.2156	15.9585	6.58595	3.16946
33733131	Island14877	chr11:89597685-89597686	-0.209504	0.0132161	13.2004	1.4546	0.336796	10.7393	12.9151	24.5457	10.7301	16.3891	6.13064	4.46506
33733133	Island14877	chr11:89597695-89597696	-0.277948	0.0622121	15.3144	5.97702	4.28857	14.7705	14.2315	32.5838	16.2726	23.4026	9.85174	5.38138
33733135	Island14877	chr11:89597697-89597698	-0.197728	0.161561	15.8388	2.66441	2.19143	8.8908	7.31513	22.2515	10.2462	15.1393	5.24405	3.59468
33733137	Island14877	chr11:89597707-89597708	-0.347985	0.00132959	10.3565	3.86571	6.21758	12.4807	9.29973	17.4401	12.6282	12.0523	10.522	3.75541
33733139	Island14877	chr11:89597728-89597729	-0.388413	0.000433114	10.5404	5.44831	7.72139	9.50019	7.98277	15.9128	13.2616	10.754	7.47604	3.47964
33733141	Island14877	chr11:89597734-89597735	-0.413618	0.000191566	9.55375	5.11997	7.20077	11.3203	8.04214	15.5546	11.9412	9.97233	8.92553	5.12498
33733143	Island14877	chr11:89597738-89597739	-0.398958	0.000219099	9.1927	3.7032	7.02113	12.7487	9.56672	15.834	12.9223	11.0053	8.35292	5.38136
33733145	Island14877	chr11:89597743-89597744	-0.357932	0.000396852	9.48109	5.10514	4.37476	9.7457	9.87174	15.832	12.627	10.0446	5.26176	3.85757
33733147	Island14877	chr11:89597756-89597757	-0.474121	3.20003e-05	9.49135	4.65843	6.05894	9.12805	9.69352	12.6044	10.5843	8.39342	7.38831	6.76346
33733149	Island14877	chr11:89597768-89597769	-0.375308	0.000326644	11.9649	4.24908	4.01087	10.3339	11.2891	16.7401	15.7298	12.3107	8.20058	3.65728
33733151	Island14877	chr11:89597772-89597773	-0.284117	0.00334437	12.3389	3.61227	2.32466	8.00165	10.2656	17.4593	11.826	8.76295	5.64616	3.77316
33733153	Island14877	chr11:89597774-89597775	-0.318926	0.00396247	9.00591	0.907869	3.31535	10.1015	8.96929	17.409	13.0509	11.5077	7.54147	4.81575
33733155	Open Sea	chr11:89597833-89597834	-0.347024	0.00388325	3.08846	1.61972	2.81975	4.11213	5.76743	6.73096	5.94012	4.71122	3.40967	3.66428
33733157	Open Sea	chr11:89597874-89597875	-0.374525	0.00304505	2.44085	2.04229	1.3203	3.89959	4.38401	5.4613	6.64137	4.98965	4.04614	3.45993
33733161	Open Sea	chr11:89597947-89597948	-0.42879	0.00339818	4.18578	1.94942	2.98019	5.15024	5.33858	6.36546	3.69631	4.93324	3.96974	2.67973
33733163	Open Sea	chr11:89597954-89597955	-0.472151	0.00418818	4.91377	2.11598	4.62411	6.7241	7.58991	8.14651	5.97867	5.00428	5.94824	1.62225
33733197	Island14878	chr11:89598528-89598529	-0.377538	0.00121625	5.18362	3.06305	5.55584	0.926571	8.99496	14.4777	9.55729	9.40109	9.38058	7.12747
33733199	Island14878	chr11:89598543-89598544	-0.392726	0.000284523	5.13144	4.08029	5.92102	2.22436	8.97166	12.0223	7.5437	8.84605	6.62043	5.09021
33733201	Island14878	chr11:89598552-89598553	-0.458589	0.000284126	6.08987	3.58846	5.67875	5.01432	8.20254	9.31649	6.56821	8.02338	6.26967	5.17979
33733203	Island14878	chr11:89598558-89598559	-0.341983	0.000261656	6.65889	4.11609	7.03363	4.28914	12.8445	17.7252	11.575	10.7434	7.20332	7.57492
33733205	Island14878	chr11:89598561-89598562	-0.428296	0.001989	6.71583	4.0658	6.9481	5.34087	8.90832	14.6472	9.44379	8.692	7.76752	5.36004
33733207	Island14878	chr11:89598564-89598565	-0.417462	0.000134519	7.19631	6.30474	7.41921	5.48746	10.5575	13.0945	10.0768	10.1152	7.25384	3.89309
33733209	Island14878	chr11:89598600-89598601	-0.397319	0.000380018	7.86018	4.57346	4.49407	4.29219	7.74895	11.4822	6.7513	8.21579	6.15009	5.29337
33733211	Island14878	chr11:89598609-89598610	-0.412238	0.000310691	8.31419	5.59264	3.95971	4.94465	7.61933	11.2234	6.36614	8.76245	7.53661	4.50402
33733213	Island14878	chr11:89598617-89598618	-0.410343	0.000376368	9.0424	5.72275	5.30114	3.20887	8.26728	12.8227	8.95415	7.94167	7.32522	4.46736
33733215	Island14878	chr11:89598624-89598625	-0.429935	0.000134519	7.68877	4.5482	6.74307	6.12628	8.74763	12.6803	7.59447	9.47821	7.98453	5.22875
33733217	Island14878	chr11:89598663-89598664	-0.300196	0.00342779	6.80632	3.83292	3.03616	3.06372	3.34776	9.14287	7.97884	7.53609	5.88456	5.38788
33733219	Island14878	chr11:89598665-89598666	-0.391654	0.000224982	7.97157	5.21414	4.00659	5.59707	6.08239	10.5409	7.75265	9.02323	5.84423	5.15904
33733221	Island14878	chr11:89598675-89598676	-0.338568	0.000917077	9.60979	5.7774	5.40425	5.80979	7.58751	15.0828	8.07772	11.7956	7.86318	6.07737
33733223	Island14878	chr11:89598700-89598701	-0.395187	0.201842	7.99928	6.20511	4.28178	2.90528	5.84934	11.1608	7.71301	7.96976	7.1501	6.63099
33733225	Island14878	chr11:89598703-89598704	-0.352829	0.000868183	5.09898	3.63971	2.93406	4.29718	4.55694	7.80207	4.37015	5.90427	5.26405	3.79273
33733227	Island14878	chr11:89598709-89598710	-0.444908	0.000432916	6.84235	5.45916	4.68694	5.10412	6.81845	9.54865	4.76203	7.05924	7.50288	5.79294
33733229	Island14878	chr11:89598722-89598723	-0.410227	0.000203761	7.99452	3.92059	4.38409	3.79393	5.11746	8.89713	4.8354	6.59548	5.19169	5.96366
33733231	Island14878	chr11:89598724-89598725	-0.420574	0.222113	4.73169	3.73888	3.35792	2.12557	3.44751	8.20653	4.03673	5.06797	5.6004	3.83496
33733233	Island14878	chr11:89598729-89598730	-0.439942	0.196067	5.59225	4.78901	5.16795	3.68291	4.09415	9.02907	3.12986	5.60204	5.78897	2.39246
33733235	Island14878	chr11:89598739-89598740	-0.412927	0.00333575	5.83127	3.38368	3.94637	3.76288	4.3513	8.31334	3.08031	4.24492	5.65891	5.11719
33737093	Open Sea	chr11:89786084-89786085	-0.200388	0.0377727	1.704	1.6122	1.91515	1.91515	0.787016	0.934485	2.2181	2.45114	2.37968	1.84023
33737115	Island14884	chr11:89786603-89786604	-0.171058	0.369365	0.362011	1.0936	-0.0268099	1.22446	1.11308	2.56074	2.24782	2.26855	2.13224	-0.121565
33737117	Island14884	chr11:89786605-89786606	-0.16078	0.311023	1.62859	1.10294	1.19736	1.23768	2.41019	2.77906	2.00072	2.45366	0.641011	1.25338
33737119	Island14884	chr11:89786630-89786631	-0.277876	0.00579106	4.82553	2.94591	5.41996	5.50775	3.89402	3.89954	5.01895	5.41996	2.55274	0.519202
33737121	Island14884	chr11:89786638-89786639	-0.302986	0.00583492	4.35259	2.25082	4.72776	5.36087	2.96185	4.71512	3.26675	3.99969	4.56486	1.66383
33737123	Island14884	chr11:89786642-89786643	-0.215524	0.000947339	2.90816	2.24865	3.50295	3.37173	2.71009	2.78329	3.09254	3.15906	1.72005	1.61572
33737125	Island14884	chr11:89786653-89786654	-0.302669	0.0456157	4.38609	2.38757	3.78548	2.83049	5.03611	3.39674	3.36974	3.54296	1.79207	2.25692
33737127	Island14884	chr11:89786655-89786656	-0.285829	0.0635815	5.57219	2.17517	3.52804	1.54554	2.47667	3.44502	3.00675	3.26652	2.67004	1.66505
33737129	Island14884	chr11:89786666-89786667	-0.276551	0.04401	3.17145	1.69236	3.5532	4.20186	2.15346	4.21624	4.5832	3.48655	2.91695	1.53135
33737131	Island14884	chr11:89786676-89786677	-0.265639	0.00646165	3.2137	3.34416	4.16995	2.05961	2.85099	3.42605	2.42892	3.43613	2.85099	2.42892
33737133	Island14884	chr11:89786681-89786682	-0.190425	0.0140673	2.43575	3.38675	3.67931	2.92939	2.79756	3.98068	2.63744	2.9633	3.72219	-0.603453
33737135	Island14884	chr11:89786690-89786691	-0.268651	0.00807441	5.31796	2.83301	4.73603	1.79362	3.17546	4.29533	3.04234	3.34753	2.9982	3.08355
33737137	Island14884	chr11:89786696-89786697	-0.255346	0.0111926	4.36733	4.40639	2.23933	1.76551	2.93277	2.72822	1.19299	3.35805	2.01171	4.14534
33737139	Island14884	chr11:89786699-89786700	-0.205981	0.0853669	3.78737	1.77568	3.16329	2.50108	3.24113	3.79532	0.545173	3.36331	2.86666	2.0475
33737141	Island14884	chr11:89786702-89786703	-0.327037	0.000134519	5.16444	2.55103	4.21014	3.47175	3.73494	4.72102	3.87913	3.97135	3.71788	5.08279
33737143	Island14884	chr11:89786714-89786715	-0.314634	0.00287725	4.24831	4.42891	4.94588	4.08264	1.6185	6.25146	4.47502	4.90914	5.45742	5.29117
33737145	Island14884	chr11:89786738-89786739	-0.253703	0.00733552	3.88756	2.93513	4.52666	5.55434	5.22104	5.09759	3.30324	4.97072	3.17446	2.55037
33737147	Island14884	chr11:89786747-89786748	-0.250183	0.0127729	2.85155	3.04698	4.43574	3.13037	5.17503	3.50503	3.50503	4.95375	2.59338	2.01509
33737149	Island14884	chr11:89786750-89786751	-0.297289	0.00754954	4.7178	3.427	2.59654	5.34768	5.96761	6.24101	5.04905	5.51057	4.46562	1.79742
33737151	Island14884	chr11:89786755-89786756	-0.328738	0.000787335	4.17889	4.92059	5.50866	4.09886	6.00777	4.50188	4.77512	6.13737	4.09886	6.56257
33737153	Island14884	chr11:89786762-89786763	-0.266821	0.0263472	3.04673	4.40151	2.24428	4.53124	4.03637	4.89115	3.89286	5.82408	2.58766	0.939623
33737155	Island14884	chr11:89786803-89786804	-0.352245	0.000301422	5.77794	3.8319	5.63546	2.85168	5.29163	3.77837	3.81427	4.97222	4.05799	5.38103
33737157	Island14884	chr11:89786813-89786814	-0.251076	0.0380642	4.18628	4.71784	2.61857	2.59698	4.58361	5.47654	3.95625	5.82525	3.93413	4.18628
33737159	Island14884	chr11:89786822-89786823	-0.358688	0.00524418	3.46241	2.73438	3.09642	2.48546	3.28712	4.82747	3.53539	3.51713	3.41691	2.51101
33737161	Island14884	chr11:89786841-89786842	-0.28633	0.0136413	2.85505	3.88565	3.42761	1.9666	3.12626	3.628	2.96021	2.28249	3.80931	2.60967
33737163	Island14884	chr11:89786847-89786848	-0.394354	0.00406152	4.14107	3.76147	3.76147	2.21103	4.27772	7.04519	3.8788	4.34812	4.73922	4.6542
33737165	Island14884	chr11:89786860-89786861	-0.196849	0.102198	3.07079	1.56783	0.664022	1.80614	1.98592	3.89035	3.22189	4.94279	3.19596	1.03972
33737167	Island14884	chr11:89786862-89786863	-0.259141	0.0176244	3.5676	1.48707	0.833575	2.61981	5.17157	4.52691	3.60125	3.81063	3.64051	2.76991
33737169	Island14884	chr11:89786867-89786868	-0.291908	0.0118559	3.56289	3.56289	2.2565	3.27889	4.7353	7.11537	2.39049	5.74022	4.86929	0.873258
33737171	Island14884	chr11:89786877-89786878	-0.250174	0.0118766	3.94663	2.48959	1.33903	2.46664	3.80153	6.00964	3.62244	6.69077	5.2179	1.03859
33737173	Island14884	chr11:89786881-89786882	-0.231469	0.460452	5.70373	3.51743	1.11595	3.38463	4.49062	7.82117	2.84015	6.10706	5.70373	4.29211
33737175	Island14884	chr11:89786906-89786907	-0.334806	0.000520742	5.3482	4.99666	2.12571	2.4919	6.06932	9.14119	4.09751	8.05345	6.61157	5.38815
33737177	Island14884	chr11:89786912-89786913	-0.311403	0.00229582	5.10321	6.14211	2.73707	3.22092	4.67324	6.40692	4.8307	7.41433	3.37076	4.29615
33737179	Island14884	chr11:89786918-89786919	-0.382091	0.000290871	6.70487	4.68216	2.02893	5.59706	5.02639	9.8955	3.66719	6.66819	4.69858	6.26478
33737181	Island14884	chr11:89786926-89786927	-0.276079	0.0113607	5.38947	4.39868	0.352253	5.94552	6.60043	4.83341	2.79454	5.62537	4.20995	2.58694
33737183	Island14884	chr11:89786928-89786929	-0.332556	0.00225572	7.87629	4.6443	1.48972	4.26352	4.29065	7.36736	3.06973	6.22976	7.46504	7.09876
33737185	Island14884	chr11:89786934-89786935	-0.31588	0.00712535	6.108	4.54984	3.27061	1.19714	3.81766	6.58817	2.92672	5.13114	7.26205	6.21638
33737187	Island14884	chr11:89786938-89786939	-0.292219	0.00445311	4.31575	5.3047	0.126261	3.23656	5.52286	4.39755	3.48283	5.28018	4.13955	4.65555
33737189	Island14884	chr11:89786955-89786956	-0.318993	0.363526	4.92383	3.46076	1.30736	4.96704	5.95416	5.7783	3.80308	6.84248	4.68746	3.54119
33737191	Open Sea	chr11:89787006-89787007	-0.293648	0.0115544	4.714	3.39156	3.31716	2.27631	2.71867	5.91789	2.93985	6.06473	5.07793	1.968
33737195	Open Sea	chr11:89787020-89787021	-0.259683	0.020709	2.79927	2.47188	1.653	1.82475	2.85519	2.81147	1.37164	2.54694	3.33606	2.05373
33804383	Island14907	chr11:94770607-94770608	-0.508443	0.065201	3.36446	2.42629	4.04896	3.58077	3.86274	3.20846	3.58991	3.25303	4.36733	3.25303
33804385	Island14907	chr11:94770616-94770617	-0.474883	0.122631	3.641	1.59693	3.81439	4.02244	3.83264	3.41743	3.23645	3.78379	4.85467	2.0539
33804387	Island14907	chr11:94770623-94770624	-0.536722	0.110109	4.78913	3.40207	4.44925	5.97868	4.01227	4.83505	5.72971	4.68916	6.48849	1.24473
33804389	Island14907	chr11:94770627-94770628	-0.518305	0.000626104	4.72917	2.96229	4.32347	5.12763	3.97572	4.0362	3.94337	4.88855	4.67121	2.63441
33804391	Island14907	chr11:94770631-94770632	-0.55195	0.0465965	5.03283	3.7573	4.9724	5.199	4.75912	4.31031	4.93787	5.10227	5.69754	1.97515
33804395	Island14907	chr11:94770664-94770665	-0.391384	0.00929496	7.2928	2.72455	4.96943	8.02517	5.83285	6.33856	5.27368	5.26432	4.54348	3.2269
33804397	Island14907	chr11:94770666-94770667	-0.491401	0.202359	6.20514	2.68967	7.56006	4.00339	4.92549	4.89776	4.5528	5.51725	5.66317	3.24895
33804399	Island14907	chr11:94770671-94770672	-0.496993	0.000696419	5.3998	3.92872	3.38388	5.18381	4.10385	4.53583	3.30809	4.36011	5.18381	3.90749
33804401	Island14907	chr11:94770677-94770678	-0.485979	0.000723225	7.75018	2.4199	6.32434	5.96855	6.90958	5.30318	5.66359	6.75064	8.14141	3.68133
33804403	Island14907	chr11:94770690-94770691	-0.509969	0.00190406	9.30453	4.39702	6.22554	4.35599	5.90703	6.7564	5.98424	8.87984	7.81812	7.52856
33804407	Island14907	chr11:94770708-94770709	-0.498562	0.00556984	6.53323	3.44887	4.42861	5.29949	4.71508	5.33253	4.39919	5.60792	4.42861	2.94416
33804409	Island14907	chr11:94770718-94770719	-0.515228	0.0014674	5.85935	3.80215	5.31102	4.4611	4.18568	4.87456	6.0735	7.02851	5.61404	4.92718
33804411	Island14907	chr11:94770720-94770721	-0.577891	0.00199949	6.14006	3.58591	5.53531	5.53531	3.3053	5.99135	5.62929	6.30805	6.35889	4.37621
33804413	Island14907	chr11:94770736-94770737	-0.527599	0.639745	5.34059	3.0664	3.66839	6.9319	4.58549	6.32638	6.02462	6.36163	5.60026	5.23125
33804415	Island14907	chr11:94770747-94770748	-0.558378	0.00173082	6.02302	4.32976	4.51727	5.34543	4.62151	5.4445	4.70636	5.93698	4.969	6.58231
33804417	Island14907	chr11:94770762-94770763	-0.556976	0.00112002	5.64485	3.60579	5.8145	7.61218	5.11631	7.32834	5.05759	6.49864	6.49864	4.85723
33804419	Island14907	chr11:94770766-94770767	-0.530875	0.00251044	6.40853	2.48301	4.65848	5.59173	4.06884	5.17668	4.62888	5.20906	4.58596	4.03255
33804421	Island14907	chr11:94770777-94770778	-0.426377	0.638022	8.21861	5.57652	5.90841	9.1812	4.00423	8.81123	4.7863	7.45359	4.98432	7.47935
33804423	Island14907	chr11:94770780-94770781	-0.53276	0.00017534	7.82587	3.46516	6.12046	8.30042	4.53237	7.23268	7.49285	7.25568	4.92586	7.74405
33804425	Island14907	chr11:94770823-94770824	-0.557815	0.000284126	6.98888	3.19613	6.04123	5.88737	5.12264	6.10593	5.81383	6.21218	4.74659	6.40324
33804427	Island14907	chr11:94770834-94770835	-0.518253	0.000723225	6.58507	3.00822	5.35046	6.38583	4.509	5.8697	6.57296	7.25999	5.08707	5.8697
33804429	Island14907	chr11:94770847-94770848	-0.520906	0.000134519	4.89379	3.7213	6.14584	5.78598	4.97796	5.86137	6.22278	6.6079	5.14648	5.97423
33804431	Island14907	chr11:94770849-94770850	-0.477622	0.000134519	9.73483	2.18974	9.39821	8.79511	5.15106	8.95404	8.9143	9.95918	6.61559	9.26676
33804433	Island14907	chr11:94770855-94770856	-0.57311	6.19994e-05	7.62757	3.54805	7.30682	7.87482	5.60559	7.06749	7.55858	7.10836	4.02488	8.03433
33804435	Island14907	chr11:94770864-94770865	-0.538067	0.000139855	6.34328	3.37086	6.58041	6.85402	4.10599	6.0546	6.10615	6.62195	4.46917	6.34328
33804437	Island14907	chr11:94770868-94770869	-0.522568	4.99108e-05	8.40126	4.24197	8.44697	7.5694	5.10153	7.79692	7.51946	8.34873	5.8417	6.22784
33804439	Island14907	chr11:94770870-94770871	-0.456343	0.000314051	6.6424	2.5831	7.21	6.62937	4.85119	8.02651	6.43885	8.07536	3.66044	6.3841
33804441	Island14907	chr11:94770876-94770877	-0.532967	0.00020642	6.5996	3.25906	7.38788	6.10711	5.74422	6.77912	7.03479	7.72869	4.62339	8.16287
33804443	Island14907	chr11:94770879-94770880	-0.472545	0.000134519	6.90395	3.37721	6.97886	6.67239	4.8788	7.6558	7.37315	7.27975	3.90202	6.05492
33804445	Island14907	chr11:94770890-94770891	-0.386712	0.00255716	5.45691	1.23348	6.47697	7.11011	4.91522	6.59902	7.07287	6.5643	4.84889	6.83876
33804447	Island14907	chr11:94770911-94770912	-0.499691	0.000345212	6.42046	4.69332	7.40164	5.61924	5.75857	7.61308	5.13975	6.50252	5.67088	6.64077
33804449	Island14907	chr11:94770916-94770917	-0.510103	0.00165918	5.95529	3.77902	6.61713	6.92179	4.31393	7.64535	6.22543	6.05696	5.8494	4.65863
33804451	Island14907	chr11:94770924-94770925	-0.588312	0.0384148	5.6944	3.51362	4.68662	5.50857	4.41735	5.029	5.97315	5.17673	5.60956	5.09289
33804453	Island14907	chr11:94770930-94770931	-0.575207	0.0639546	5.41958	3.86513	5.34783	4.30403	3.83749	4.92521	5.62684	5.51753	4.37386	6.35225
33804455	Island14907	chr11:94770934-94770935	-0.549808	0.0358386	5.8459	3.34921	5.47716	5.33376	4.58883	4.48579	5.8459	5.22303	5.40692	5.18743
33804457	Island14907	chr11:94770942-94770943	-0.493717	0.000681912	6.01071	2.16983	6.47162	4.02405	4.55383	6.85417	8.06962	6.88485	7.11442	5.87827
33804459	Island14907	chr11:94770946-94770947	-0.579397	0.0300786	5.95193	3.60322	6.31202	5.72451	4.1599	5.03536	5.92193	5.73159	4.77693	6.6721
33804461	Island14907	chr11:94770951-94770952	-0.479795	0.00175215	4.9295	3.15777	6.61883	4.46878	4.78873	5.51917	4.3488	6.2342	5.82385	3.50894
33804463	Island14907	chr11:94770954-94770955	-0.51635	0.00165005	8.36296	2.3639	7.31421	4.17359	4.68998	6.6751	7.53013	5.43739	7.41582	5.97552
33804465	Island14907	chr11:94770956-94770957	-0.56943	0.000134519	6.47136	4.20181	7.32474	7.36228	3.98389	6.7431	7.99748	6.70894	6.52959	5.10072
33804477	Island14907	chr11:94770996-94770997	-0.597315	0.000606212	4.64617	4.58442	7.74655	7.48511	7.03996	6.35252	7.34434	6.1839	6.11256	6.64047
33804481	Island14907	chr11:94771002-94771003	-0.468285	0.00124659	5.23077	2.9195	6.64186	2.58497	3.89595	5.93632	6.64186	5.13794	5.93632	4.52523
33804483	Island14907	chr11:94771009-94771010	-0.596794	0.1063	7.26012	3.65597	8.71802	4.86784	5.37811	6.4543	8.03039	6.043	7.86448	7.35169
33804485	Island14907	chr11:94771015-94771016	-0.552139	0.000458516	5.52438	3.86963	5.52438	5.02796	4.25066	5.49853	4.72134	4.49016	6.22248	3.86963
33804487	Island14907	chr11:94771022-94771023	-0.585327	4.65008e-05	6.44764	4.22035	7.88681	5.5761	5.62526	7.78849	7.23215	6.38788	7.4022	6.19065
33804489	Island14907	chr11:94771024-94771025	-0.561488	0.000363128	5.09456	3.2689	8.2126	4.97967	6.27043	7.15104	6.54788	6.68	7.73696	7.47272
33804491	Island14907	chr11:94771033-94771034	-0.447512	0.35751	8.68167	2.3379	6.71291	5.16416	3.95985	7.93982	5.40041	6.68308	5.80145	3.37696
33804493	Island14907	chr11:94771036-94771037	-0.537142	0.207793	9.46615	2.80539	8.08806	6.82022	4.98736	7.54881	7.39902	8.18421	8.62398	7.50502
33804495	Island14907	chr11:94771048-94771049	-0.480715	0.00145328	8.09976	2.51799	5.41224	5.36234	5.50269	6.35455	5.61897	8.30649	8.30649	6.46469
33804501	Island14907	chr11:94771086-94771087	-0.553347	0.000310691	5.12252	2.97025	4.49373	4.19538	4.49373	4.11487	4.89982	5.02846	3.9136	4.75893
33804503	Island14907	chr11:94771090-94771091	-0.484778	0.00115796	5.7426	2.68226	4.54572	4.90035	4.41907	5.02068	4.65971	5.02068	4.74634	3.11272
33804505	Island14907	chr11:94771095-94771096	-0.531288	0.000281317	4.87515	3.02004	3.46007	4.46035	4.68032	4.92099	4.33937	5.15145	5.09995	4.87515
33804507	Island14907	chr11:94771099-94771100	-0.504603	0.00441368	5.49293	2.73466	5.28278	4.68621	4.07535	5.16603	4.02185	6.32209	4.34876	4.02185
33804509	Island14907	chr11:94771102-94771103	-0.512182	0.0638805	3.99069	2.42335	3.95929	3.17023	3.2301	4.02558	4.55589	3.81528	3.78883	4.55589
33804511	Island14907	chr11:94771107-94771108	-0.507483	0.00137439	4.13038	1.87741	3.48073	4.40205	3.10312	3.65853	4.52468	4.60176	3.60741	4.15372
33804513	Island14907	chr11:94771123-94771124	-0.461049	0.00287725	4.17917	2.73087	3.7304	4.62794	3.13462	3.5313	3.50602	4.60522	3.7304	3.59382
33804515	Island14907	chr11:94771129-94771130	-0.435507	0.000345212	5.08606	3.54416	3.74198	5.77107	4.16603	5.01691	5.63466	6.31163	3.7157	5.16149
33804517	Island14907	chr11:94771141-94771142	-0.433845	0.00177229	4.94093	3.5823	4.27809	4.386	3.38711	4.39953	3.62296	5.84196	3.93329	4.36545
33804519	Island14907	chr11:94771165-94771166	-0.371904	0.00530565	3.23129	1.37313	3.41358	3.71421	1.86286	2.83059	2.98675	3.74818	2.95552	3.27675
33804521	Island14907	chr11:94771192-94771193	-0.225709	0.113773	2.12049	0.508205	2.26393	2.68363	1.64918	2.36677	1.58191	2.64117	2.00573	2.05773
33804523	Island14907	chr11:94771222-94771223	-0.0460099	1	0.29008	0.591285	0.69442	0.911656	-0.311559	0.475703	0.710707	0.967228	0.35341	0.501181
33804525	Island14907	chr11:94771231-94771232	-0.0747325	0.675859	1.74565	0.660744	1.78984	2.04516	0.487692	1.368	2.04516	1.92806	-0.234061	1.02942
33804527	Island14907	chr11:94771246-94771247	-0.133659	0.271075	1.61251	1.23048	2.18498	2.41131	1.01854	1.5701	2.21731	1.76467	1.1481	2.41131
33804529	Island14907	chr11:94771267-94771268	-0.0234775	0.935299	1.33332	1.55414	-0.166118	1.86883	1.04385	1.60107	0.579073	1.18031	-0.906098	-0.364649
33804531	Island14907	chr11:94771272-94771273	-0.0262088	0.782618	1.00489	0.914239	0.533485	0.224468	-0.455138	1.27927	1.10088	0.845899	-1.35215	1.54883
33804533	Island14907	chr11:94771276-94771277	-0.0150143	0.888729	-0.246061	1.32161	0.422917	1.69167	-0.153788	1.05729	1.69167	-0.266404	0	-0.972708
33804535	Island14907	chr11:94771291-94771292	-0.0887637	0.538183	1.7783	1.30038	0.16847	1.7783	0.554829	0.928666	1.7783	1.31486	1.09859	1.37584
33804537	Island14907	chr11:94771303-94771304	-0.068156	0.160949	1.91045	0.897021	1.91045	1.38684	1.28212	1.91045	1.55345	0.87094	0.948726	1.91045
33804539	Island14907	chr11:94771318-94771319	-0.0508688	0.31784	1.78868	1.96543	2.31304	2.31304	1.49891	2.31304	1.24625	0.532498	2.31304	1.60993
33804541	Island14907	chr11:94771339-94771340	-0.0152356	0.456956	2.0286	0.981225	-0.92115	-0.380362	1.4029	1.04535	-1.6775	0.760725	2.0286	-0.0215809
33804543	Island14907	chr11:94771363-94771364	-0.0392536	0.248407	1.27495	1.50161	1.1518	0.96532	0.509474	-0.226891	1.87701	0.367793	1.87701	1.87701
33804545	Island14907	chr11:94771372-94771373	-0.0530507	0.800298	1.14755	0.741706	0.741706	0.271787	-0.258602	0.271787	-0.0699723	0.81026	0.751369	0.139096
33804547	Island14907	chr11:94771390-94771391	-0.0126311	0.880502	0.826526	-0.413263	0.826526	0.826526	0.826526	0.351713	-1.7239	0.520825	0.826526	0.826526
33804549	Island14907	chr11:94771393-94771394	-0.0131953	0.564635	0.104612	-0.293317	0.81312	0.81312	0.81312	-0.0553738	-0.249642	0	0.81312	0.81312
33804551	Island14907	chr11:94771403-94771404	-0.013572	0.928405	1.4519	0.0223369	-0.136503	-0.930706	-0.699063	0.747949	0.614769	1.00623	0.677554	1.4519
34137969	Open Sea	chr11:117069859-117069860	-0.229438	0.0057712	2.11126	2.00846	2.0801	1.58408	2.5503	1.93681	1.36362	0.775743	1.58408	2.40252
34137971	Open Sea	chr11:117069891-117069892	-0.242258	0.0231162	1.65199	2.59928	0	1.29531	2.68366	2.27581	1.95235	0.471021	1.84722	1.95235
34137989	Open Sea	chr11:117070080-117070081	-0.202694	0.0414807	2.38292	0.952974	-0.0283584	-1.09567	1.503	2.27272	1.44628	0.59479	1.67315	1.27097
34137991	Open Sea	chr11:117070098-117070099	-0.208699	0.044776	2.07366	2.12811	1.08788	0.0668924	0.683557	3.07705	0.903048	1.03987	1.68346	1.48836
34549091	Open Sea	chr12:73672-73673	-0.282708	0.022118	1.6462	0.345479	5.17838	2.71447	2.74841	3.46677	3.0247	2.14056	4.15155	4.25268
34612941	Island15210	chr12:2339614-2339615	-0.353531	0.0115961	3.96737	2.77215	3.4578	1.93061	3.85737	2.95485	2.88699	2.87677	2.51377	-0.1921
34916799	Open Sea	chr12:15743183-15743184	-0.281584	0.028862	1.99405	1.80359	1.71952	4.88912	3.26406	3.67063	2.27243	2.30424	5.9024	6.02647
34916803	Open Sea	chr12:15743202-15743203	-0.330051	0.00953582	3.4418	3.73403	1.70728	2.30941	3.43639	3.16383	3.58791	2.53212	5.12211	3.64808
34916805	Open Sea	chr12:15743215-15743216	-0.303077	0.00498661	4.026	3.52443	2.577	1.81906	3.81845	2.66832	3.52443	2.46387	5.53482	3.84023
35094167	Open Sea	chr12:27932413-27932414	-0.228104	0.00406152	4.36714	1.07499	1.72166	2.65115	3.72581	1.63632	5.51556	3.70161	4.13957	4.13957
35094169	Open Sea	chr12:27932469-27932470	-0.28966	0.000868183	1.54735	2.44412	3.23839	2.52766	4.49194	3.46758	3.17151	4.88179	4.36575	3.77585
35094171	Open Sea	chr12:27932471-27932472	-0.330163	0.000394653	2.31701	3.15836	4.59096	4.47527	6.14109	3.6894	1.87618	4.49843	4.9298	5.50973
35094173	Open Sea	chr12:27932477-27932478	-0.29285	0.000997507	3.34132	2.42587	6.56767	6.02085	5.08007	4.62118	3.0847	6.90433	5.76489	7.69045
35266461	Open Sea	chr12:41581874-41581875	-0.252494	0.0292289	2.90032	1.59928	1.89315	2.38338	2.20299	2.14371	2.51121	2.79023	2.27982	0.306245
35374115	Open Sea	chr12:48690971-48690972	-0.38281	0.00326438	5.39617	2.40439	5.9321	4.97718	3.41292	2.29989	4.91607	3.77528	4.24393	4.35147
35374117	Open Sea	chr12:48690974-48690975	-0.362821	0.00201028	4.23478	3.42171	4.46891	4.69539	3.51067	1.9933	3.93133	3.70913	4.50173	4.18817
35374119	Open Sea	chr12:48691036-48691037	-0.330906	0.00837318	4.00106	3.251	4.52314	4.70631	3.70283	4.10293	4.83583	3.39429	4.11425	4.13349
35374121	Open Sea	chr12:48691056-48691057	-0.398435	0.00173098	4.60192	2.95045	4.60192	3.7602	4.32469	4.18021	5.74741	4.10404	5.40317	3.21856
35374123	Open Sea	chr12:48691101-48691102	-0.284654	0.0200453	2.05646	2.05409	1.4928	3.24435	3.89834	2.83632	4.3264	2.72116	3.57729	2.21432
35426539	Open Sea	chr12:50426493-50426494	-0.2171	0.0216376	1.57342	2.96621	0.841622	1.97903	0.714953	2.78712	3.14325	2.0246	0.369493	3.74704
35453359	Open Sea	chr12:51477739-51477740	-0.227721	0.00976641	2.40505	1.58046	3.37957	1.791	2.45356	3.93207	3.28372	3.75886	0.974643	2.64065
35462603	Open Sea	chr12:51786489-51786490	-0.224033	0.0132413	2.72538	1.26224	3.28981	2.54569	2.23784	2.51097	1.38599	1.70534	1.5944	0.890991
35462605	Open Sea	chr12:51786547-51786548	-0.203823	0.0100317	1.72565	0.529654	2.73593	1.55896	2.47742	3.32217	3.0925	1.55652	1.75671	-0.204023
35462607	Open Sea	chr12:51786559-51786560	-0.237154	0.00687869	2.04202	1.02373	3.10648	3.38889	2.67254	3.80794	2.52075	1.49893	2.33771	0.431917
35462609	Open Sea	chr12:51786566-51786567	-0.238443	0.00489155	2.14363	1.6851	2.41815	3.0263	4.12678	3.76701	2.81232	1.74242	2.27737	0.739381
35462611	Open Sea	chr12:51786577-51786578	-0.2105	0.00973506	2.49924	1.87894	2.47762	2.60193	3.38918	3.56986	2.16457	1.49579	2.01149	0.603524
35470737	Open Sea	chr12:52207841-52207842	-0.327811	0.000997507	1.58696	4.33573	5.90036	1.67918	5.18356	4.22782	6.05965	4.52649	5.2809	3.91809
35591745	Open Sea	chr12:56710370-56710371	-0.206306	0.0348005	8.96966	3.57431	6.36369	2.07527	3.67954	4.22292	1.62827	3.49061	2.71533	7.70425
35591751	Open Sea	chr12:56710417-56710418	-0.234383	0.00333575	3.18355	4.31862	4.27457	1.73365	3.3119	3.21345	3.38595	3.94212	2.96427	1.69011
35712759	Island15752	chr12:64215530-64215531	-0.369384	0.37217	2.85927	2.38836	2.85927	2.6362	3.32255	2.49229	3.43286	2.31754	2.6362	0
35712761	Island15752	chr12:64215560-64215561	-0.312022	0.00498661	4.30457	4.02754	0.391566	4.02754	6.39766	4.99713	4.85862	3.49867	5.10487	0.703221
35712763	Island15752	chr12:64215571-64215572	-0.411065	0.013043	4.50471	4.14544	2.76362	3.8797	6.6639	3.38367	4.57725	3.40239	5.80873	1.64754
35712765	Island15752	chr12:64215578-64215579	-0.425509	0.00310405	5.10228	4.25021	5.52758	3.96067	5.80738	3.82145	5.65194	4.21866	4.99129	1.17984
35712767	Island15752	chr12:64215598-64215599	-0.392372	0.0226068	3.49217	3.13183	4.40158	1.54341	5.25751	1.8286	4.17423	3.71219	3.49217	2.12804
35712769	Island15752	chr12:64215602-64215603	-0.347959	0.430883	1.74815	3.61671	2.82158	0.817849	5.72274	2.82158	3.48215	3.28398	4.47301	1.96284
35712771	Island15752	chr12:64215611-64215612	-0.337974	0.0303223	4.27097	3.24302	2.27631	1.34911	6.3082	2.96633	5.54361	2.92841	4.96623	2.15857
35712773	Island15752	chr12:64215617-64215618	-0.383164	0.01341	4.07782	3.0498	4.51395	1.90487	4.90647	2.83049	4.17377	3.67916	3.8195	1.6791
35712775	Island15752	chr12:64215638-64215639	-0.387992	0.0374001	3.39006	3.66653	4.07474	1.79558	4.28661	2.49902	4.32798	2.80763	5.03143	1.66712
35712777	Island15752	chr12:64215653-64215654	-0.32426	0.00211413	3.30319	4.74245	6.6862	2.50719	6.4939	3.51534	5.2109	4.83299	5.93838	3.26362
35712779	Island15752	chr12:64215659-64215660	-0.194955	0.534581	2.82618	3.8074	3.82223	0.880844	2.26503	2.92566	2.06246	2.34808	2.7841	0.880844
35712781	Island15752	chr12:64215680-64215681	-0.461437	0.130263	3.07458	3.56538	3.50742	5.14078	3.53076	2.96584	4.38944	2.74287	4.74534	2.45741
35712783	Island15752	chr12:64215686-64215687	-0.410519	0.00069647	3.94698	3.93316	4.11025	3.21774	4.11025	3.99281	4.60004	3.98765	5.78371	1.70047
35712785	Island15752	chr12:64215692-64215693	-0.405317	0.14523	2.84258	2.46876	2.37895	3.7036	3.43867	3.48283	3.98247	2.77033	5.02825	1.38547
35712787	Island15752	chr12:64215702-64215703	-0.382162	0.00798005	3.6299	3.12749	2.0494	1.78743	3.62317	4.1718	4.10821	3.40965	4.93706	0.977697
35712797	Island15752	chr12:64215769-64215770	-0.410016	0.00428748	2.36123	2.32266	4.15148	4.07514	3.96061	2.81537	4.67638	3.5118	4.8768	1.90592
35712801	Island15752	chr12:64215797-64215798	-0.332552	0.269801	2.24753	4.62472	6.85178	5.05012	3.66026	3.71042	4.58815	2.62252	4.96432	0.979692
35712803	Island15752	chr12:64215824-64215825	-0.418468	0.000540718	2.88054	3.86081	4.19054	3.83931	4.55126	3.19148	4.79611	2.72258	2.89099	3.01977
35712805	Island15752	chr12:64215830-64215831	-0.325038	0.0230984	2.27718	3.5453	4.8146	2.63657	5.40016	4.01217	5.04757	2.94226	3.20973	0.802434
35712809	Island15752	chr12:64215855-64215856	-0.160407	0.156472	2.70513	1.64777	3.18183	1.71201	2.28234	2.56232	1.53619	0.353782	1.57839	0.193597
35712811	Island15752	chr12:64215858-64215859	-0.291469	0.03832	2.69748	2.75274	3.10364	2.97296	3.2412	2.4961	3.10364	1.65165	3.99226	0.19305
35712813	Island15752	chr12:64215864-64215865	-0.254924	0.0656104	1.53252	2.21465	5.75856	1.79126	2.14951	1.79126	3.04077	2.61922	3.73179	0.682384
35712815	Island15752	chr12:64215869-64215870	-0.348013	0.00409779	3.32144	3.39574	4.28788	3.74609	3.18139	3.0695	4.27233	1.55593	1.96063	2.83713
35712817	Island15752	chr12:64215891-64215892	-0.296915	0.0210154	1.72096	1.65177	3.55366	1.81178	2.67586	2.25928	2.64095	2.15786	2.54228	2.67586
35712819	Island15752	chr12:64215893-64215894	-0.259407	0.0087974	1.88642	1.4353	3.33691	2.84744	2.89718	2.67767	1.96001	1.9878	2.73804	1.86276
35712821	Island15752	chr12:64215897-64215898	-0.284674	0.0122555	2.03044	2.52636	3.52863	3.54152	3.28015	2.48532	3.09501	1.53937	2.50255	0.919594
35712823	Island15752	chr12:64215916-64215917	-0.226587	0.0868412	1.9866	2.58135	5.11955	2.55512	4.16895	1.14557	1.46559	1.30722	3.67439	0.927904
35712825	Island15752	chr12:64215942-64215943	-0.348931	0.00812413	1.90922	2.54757	3.01808	2.23338	3.82103	1.46317	2.71079	2.33172	2.94654	2.42788
35712827	Island15752	chr12:64215957-64215958	-0.253938	0.162019	2.50378	1.51468	2.3169	2.14388	2.48257	2.05246	2.83599	1.88135	1.87768	2.34744
35712829	Island15752	chr12:64215959-64215960	-0.200992	0.12253	1.08875	2.12456	0.870418	2.57341	2.16276	2.04703	1.99439	1.90787	2.57341	2.00575
35712831	Island15752	chr12:64215981-64215982	-0.2585	0.0102592	3.87992	1.03391	4.30064	3.45921	1.84532	2.67581	2.15354	3.57395	2.5126	1.39388
35712833	Island15752	chr12:64215983-64215984	-0.169166	0.0107798	0.433094	0.909753	2.30574	2.47482	1.81538	1.79786	1.9394	1.52814	1.89479	0.560296
35712835	Island15752	chr12:64215987-64215988	-0.26673	0.261183	2.23215	1.47374	2.89577	1.83399	2.63032	1.18058	1.93467	1.97369	1.75815	0.723942
35712837	Island15752	chr12:64215989-64215990	-0.157738	0.0945119	0.614508	0.529748	1.30029	2.36621	1.47515	0.92706	2.36621	1.27889	0.816099	1.49293
35713249	Open Sea	chr12:64237183-64237184	-0.210339	0.0362652	1.20818	1.03392	2.824	1.99233	2.30779	3.70138	1.38243	3.09353	1.50048	3.96552
35880779	Open Sea	chr12:75785389-75785390	-0.352613	0.00603246	1.93088	2.23806	4.55902	5.28432	4.05974	4.51439	4.09109	3.86464	5.08651	3.66229
35949711	Open Sea	chr12:80907244-80907245	-0.366191	0.0218564	3.21219	4.01524	2.33614	4.29438	1.62232	1.46009	4.15563	2.78112	1.79703	4.9643
36049089	Open Sea	chr12:89748839-89748840	-0.244294	0.0236819	1.30647	2.80378	2.23429	1.16139	3.19962	3.08163	2.83151	0.838566	1.23308	2.50802
36108445	Open Sea	chr12:94070836-94070837	-0.20101	0.0377632	4.40397	2.15561	3.66901	1.45677	1.953	1.63375	2.70986	2.8756	6.34278	4.34743
36108447	Open Sea	chr12:94070915-94070916	-0.219678	0.00460765	4.47316	1.77708	7.32326	1.95195	4.96855	2.77199	4.89281	2.55234	3.28452	4.30958
36130869	Open Sea	chr12:95266701-95266702	-0.246231	0.0448655	1.00163	2.00629	3.62376	1.69472	3.35156	2.45137	2.16224	1.98337	3.45007	3.54713
36152677	Open Sea	chr12:96251929-96251930	-0.261293	0.00115796	3.89816	3.38365	5.16843	5.43768	3.45504	5.64438	3.11236	6.98523	3.45504	0.431395
36152681	Open Sea	chr12:96251991-96251992	-0.256488	0.00285496	5.70761	3.55929	8.63651	3.19197	5.06675	5.26867	4.31087	4.01908	5.95621	2.96109
36220899	Open Sea	chr12:100592958-100592959	-0.208596	0.0229856	1.11975	1.5054	2.30885	1.03405	2.02213	1.81393	3.16901	1.96879	1.12634	2.04928
36594517	Open Sea	chr12:117628604-117628605	-0.204735	0.0363031	1.34381	3.96676	3.68165	3.28862	1.23451	3.42019	2.6193	2.30293	3.39698	1.45448
36844067	Open Sea	chr12:125413215-125413216	-0.535506	0.000868788	4.58414	5.76081	5.3931	6.27241	7.01103	8.08965	4.77082	7.1908	7.61776	8.22448
37132539	Open Sea	chr13:20439254-20439255	-0.252757	0.00329664	5.22127	1.78562	4.3485	5.74116	5.42306	8.87212	10.1919	4.86108	1.42185	2.19568
37147141	Open Sea	chr13:20968729-20968730	-0.338245	0.0313619	1.01032	2.41374	3.05791	2.69023	3.04419	2.80267	-0.324413	2.64165	0.865236	1.4441
37147143	Open Sea	chr13:20968755-20968756	-0.283986	0.0136227	1.13114	3.15861	2.70183	2.60567	3.30412	2.5206	0.859519	2.48926	3.35968	2.93743
37206147	Open Sea	chr13:23501466-23501467	-0.305239	0.00665292	4.74087	3.0813	8.18674	2.0514	6.11315	5.83766	3.0511	3.91569	3.72243	4.57277
37228247	Open Sea	chr13:24520313-24520314	-0.375821	0.0434507	2.35313	1.91681	2.23869	2.33406	1.19695	2.81091	2.49301	2.6998	2.81091	2.81091
37228259	Open Sea	chr13:24520402-24520403	-0.30669	0.0197992	2.27787	2.16483	1.98943	2.80066	1.19664	2.80066	2.80066	2.80066	2.53926	2.80066
37228265	Open Sea	chr13:24520415-24520416	-0.359195	0.0107783	2.33175	2.25054	2.04328	2.15633	1.44977	2.54214	2.26327	2.2554	2.31783	2.01502
37256481	Open Sea	chr13:25670024-25670025	-0.22762	0.0302355	3.5203	3.08837	3.1994	3.85868	1.30511	3.49868	5.24605	6.03844	5.65662	4.30473
37261211	Open Sea	chr13:25874931-25874932	-0.422627	0.000138096	3.75604	1.57512	4.43303	3.08702	2.40617	3.46573	3.52628	3.5033	3.84631	4.05339
37261213	Open Sea	chr13:25874941-25874942	-0.404199	0.000151225	3.45764	2.083	4.29225	3.02408	3.77559	3.12588	3.87235	3.97323	2.84046	3.55805
37261215	Open Sea	chr13:25874957-25874958	-0.38958	0.000141542	3.14187	3.42749	3.22347	2.57062	4.35157	2.86644	4.07664	3.41029	2.47541	3.29766
37390725	Open Sea	chr13:31775346-31775347	-0.232085	0.0241373	2.4659	3.134	6.23042	0.400443	2.3565	2.14591	3.12228	1.97361	3.96168	1.11211
37558897	Open Sea	chr13:42535652-42535653	-0.221306	0.00222054	1.87478	0.703044	4.98029	2.65148	0.83736	1.90502	2.83852	2.32091	2.13556	2.99073
37558899	Open Sea	chr13:42535665-42535666	-0.205496	0.0056969	1.38754	0.754627	4.72472	1.39775	0.922869	2.38212	2.58304	2.14625	1.83962	2.96336
37608617	Open Sea	chr13:45492955-45492956	-0.282721	0.0276451	1.19266	1.2344	3.8016	0.983944	3.31243	1.8722	4.07149	1.91677	3.48853	1.61009
37660455	Open Sea	chr13:48575859-48575860	-0.202027	0.0176695	1.87824	1.7541	1.68076	1.36208	0.622086	1.40643	1.08967	1.99772	0.528809	1.43019
37660463	Open Sea	chr13:48575927-48575928	-0.227455	0.00452009	2.42683	1.70222	1.54166	1.93352	1.0682	2.20039	1.96614	2.23036	0.356535	1.77582
37667005	Open Sea	chr13:48895083-48895084	-0.324209	0.0346352	1.32896	1.16284	4.30683	2.5841	3.98689	4.45757	4.06996	2.72667	2.43644	2.17064
37667011	Open Sea	chr13:48895173-48895174	-0.301218	0.0234657	1.56301	2.69028	4.54695	4.67326	4.71273	6.68264	6.04613	3.22076	1.17118	2.58649
37669879	Open Sea	chr13:49106105-49106106	-0.29255	0.00183731	1.91762	3.57443	5.83186	5.93782	4.54902	3.68884	5.97611	3.86185	2.98967	2.07077
37669881	Open Sea	chr13:49106134-49106135	-0.271556	0.00964934	3.89856	1.3587	9.65973	4.96403	6.19418	4.03094	9.30955	5.18264	2.26708	1.96379
37737625	Open Sea	chr13:52769906-52769907	-0.351399	0.014911	1.84987	4.09105	3.26735	2.55374	3.58266	2.38369	4.39723	5.36802	2.55374	6.07312
37737627	Open Sea	chr13:52769951-52769952	-0.254827	0.00216486	2.73557	2.53319	2.61993	3.21175	2.73557	3.33205	1.39813	2.35463	3.27524	3.42943
38041299	Open Sea	chr13:77461335-77461336	-0.266986	0.0310799	3.93552	1.6864	4.31015	1.52259	3.0926	4.22878	0.693292	2.65547	3.86591	2.20987
38217203	Open Sea	chr13:92051773-92051774	-0.206301	0.011723	0.191841	0.0109623	1.69916	3.5274	0.0159867	2.82243	1.19143	4.01039	0.983184	3.41275
38280585	Open Sea	chr13:96297271-96297272	-0.207063	0.00209161	2.54355	0.777334	3.98528	2.02902	2.98994	2.74039	3.27391	3.50111	4.0677	1.55253
38280587	Open Sea	chr13:96297281-96297282	-0.212153	0.00227021	4.86318	2.97714	5.75776	2.4371	3.45785	3.8264	1.99123	2.82085	4.1689	2.87922
38358567	Open Sea	chr13:100218927-100218928	-0.234398	0.00382668	1.94481	1.78922	1.94481	1.94481	1.94481	1.42619	1.94481	1.83207	-0.129654	1.94481
38358569	Open Sea	chr13:100218970-100218971	-0.275824	0.000151225	1.96723	1.68679	1.96723	1.96723	1.96723	1.83452	1.96723	1.96723	1.14148	1.96723
38358579	Open Sea	chr13:100219056-100219057	-0.25831	0.0189991	1.51385	1.51385	0.801451	1.51385	1.21108	1.51385	1.51385	1.51385	1.51385	1.51385
38358581	Open Sea	chr13:100219062-100219063	-0.2438	0.00554054	1.55044	1.55044	1.55044	1.55044	1.55044	1.55044	1.55044	1.55044	0.310089	1.55044
38486059	Open Sea	chr13:107569748-107569749	-0.33255	0.0481001	0.0309772	4.2149	2.46326	4.08073	5.38048	4.18647	4.38882	3.23836	3.51357	4.08073
38705865	Island17000	chr13:114965128-114965129	-0.301478	0.215214	1.57618	2.36037	1.39787	0.4455	0.506289	2.29198	2.39605	1.74443	3.18103	1.67649
38705867	Island17000	chr13:114965131-114965132	-0.217645	0.13534	0.339376	1.99855	2.06858	0.76602	0.317828	1.60638	2.97897	1.05444	1.50834	1.99855
38705869	Island17000	chr13:114965133-114965134	-0.329152	0.0134014	0.449713	2.56326	2.44753	2.17468	1.11216	2.46994	2.27262	1.94703	1.98036	2.14077
38705871	Island17000	chr13:114965139-114965140	-0.210196	0.150228	-0.12189	2.59448	1.89959	0.16011	0.923303	1.70546	1.82526	1.54888	2.95647	0.16011
38705873	Island17000	chr13:114965147-114965148	-0.265476	0.0118766	0.253108	1.88018	1.89235	1.10398	1.37211	1.89469	1.86723	1.71619	2.15571	1.21104
38705875	Island17000	chr13:114965154-114965155	-0.23977	0.122839	-0.696474	2.10797	2.38076	1.03552	1.60403	1.69937	2.90573	1.66722	2.2196	1.13771
38705877	Island17000	chr13:114965162-114965163	-0.201626	0.203124	1.43282	0.936224	3.16403	0.807156	0.763421	0.649655	2.62948	1.04644	1.42533	2.42538
38705879	Island17000	chr13:114965167-114965168	-0.290013	0.058868	0.241383	2.53674	1.30842	1.17988	1.76555	2.09785	1.78724	2.04173	2.86491	0.962781
38705881	Island17000	chr13:114965170-114965171	-0.226163	0.115299	0.382375	2.45092	1.21308	1.78884	1.34613	1.57014	2.51155	2.15101	2.85029	1.12033
38705883	Island17000	chr13:114965172-114965173	-0.289715	0.102582	-0.154387	2.4004	2.06153	1.07053	1.238	1.67975	1.97052	1.94377	2.53297	0.707745
38705885	Island17000	chr13:114965178-114965179	-0.285574	0.0219731	0.503541	2.80019	1.67269	1.20126	1.98141	2.51225	2.50093	2.15021	3.04169	1.5184
38705887	Island17000	chr13:114965182-114965183	-0.242936	0.095546	0.865632	1.69418	2.58658	1.41344	1.55926	1.35213	2.55648	1.96836	1.3499	2.78971
38705889	Island17000	chr13:114965186-114965187	-0.298129	0.0211714	0.388782	2.00883	2.14211	1.34588	1.90837	1.90875	1.41236	1.80563	2.33791	1.18717
38705891	Island17000	chr13:114965193-114965194	-0.225522	0.0813687	1.11573	2.45096	2.20357	0.382379	1.55139	1.52581	1.6451	2.20991	2.54694	0.667789
38705893	Island17000	chr13:114965206-114965207	-0.301573	0.0737964	-0.287953	3.18572	0.982738	1.51407	2.0693	2.73698	2.07948	2.741	3.14361	0.990257
38705895	Island17000	chr13:114965209-114965210	-0.264171	0.106885	-0.0945967	2.56763	2.57312	1.46636	2.00491	2.0384	2.37189	2.80136	3.40678	-0.210027
38705897	Island17000	chr13:114965211-114965212	-0.313704	0.0551499	-0.168337	3.45903	2.43848	2.28809	2.41276	2.81	1.96547	3.04093	3.41042	0.561572
38705899	Island17000	chr13:114965217-114965218	-0.253481	0.13014	-0.0598679	3.30236	1.97625	0.433696	2.30139	2.20302	2.28949	3.17492	3.40577	-0.52974
38705901	Island17000	chr13:114965221-114965222	-0.240157	0.040931	1.07497	1.76776	1.95596	1.54766	1.67278	1.84382	2.17863	2.0199	1.41658	2.36257
38705903	Island17000	chr13:114965225-114965226	-0.27171	0.0296623	-0.0676788	2.38687	2.48701	1.5481	2.0906	2.23812	1.37638	2.34237	2.46179	0.492538
38705905	Island17000	chr13:114965232-114965233	-0.215993	0.124284	0.161099	2.30642	1.77494	0.833332	1.65017	1.9559	1.21847	2.4132	2.85767	-0.475746
38705907	Island17000	chr13:114965245-114965246	-0.339884	0.0393571	-0.27585	2.82471	2.25387	1.74645	2.19805	2.76641	1.98197	2.69191	2.99487	1.00344
38705909	Island17000	chr13:114965248-114965249	-0.2463	0.0981328	-0.247646	2.68845	2.5494	1.21136	1.83402	1.77747	2.28323	2.59684	2.18671	0.865465
38705911	Island17000	chr13:114965250-114965251	-0.320535	0.112179	-0.7663	2.93845	2.55692	1.81313	2.5706	2.48394	1.79553	2.87538	2.81522	-0.0413855
38705913	Island17000	chr13:114965256-114965257	-0.28334	0.130367	0.323979	3.24483	2.32087	1.11918	2.59655	3.09344	2.74611	3.04678	3.31066	-0.805318
38705915	Island17000	chr13:114965260-114965261	-0.241713	0.0352924	0.0867585	1.8406	1.79428	1.6914	1.51422	1.55626	1.92764	1.66145	2.17802	2.20325
38705917	Island17000	chr13:114965264-114965265	-0.272958	0.0902614	-0.64539	2.07332	1.70677	1.52709	1.83146	2.119	1.62704	1.99472	2.29768	0.149118
38705919	Island17000	chr13:114965271-114965272	-0.282752	0.0665851	0.037934	2.66907	2.07427	1.51999	1.69989	2.29616	3.04577	2.79872	2.92219	1.20832
38705921	Island17000	chr13:114965279-114965280	-0.310172	0.0437	1.15882	1.64409	3.01517	0.648149	1.44419	2.28396	2.76264	2.08098	2.55602	3.47695
38705923	Island17000	chr13:114965284-114965285	-0.367655	0.0141436	-0.610359	3.22958	2.79466	1.44351	2.29554	2.99715	2.29959	2.64152	3.40733	2.27081
38705925	Island17000	chr13:114965287-114965288	-0.275634	0.0520956	0.619484	3.3377	2.11809	1.83675	2.79775	3.02007	2.21467	3.0072	3.48844	0.0232307
38705927	Island17000	chr13:114965289-114965290	-0.351773	0.0375965	-0.122951	3.00811	3.36727	1.68769	2.50083	2.83053	2.51706	2.94263	3.75201	0.418034
38705929	Island17000	chr13:114965295-114965296	-0.303291	0.0234657	1.0619	3.7061	2.45256	2.54064	2.98647	3.24663	3.01201	3.66588	4.62117	-0.385098
38705931	Island17000	chr13:114965299-114965300	-0.211546	0.0752089	1.53491	1.4065	2.02523	1.67492	1.30432	1.05835	2.73406	1.77063	1.17775	1.82271
38705933	Island17000	chr13:114965303-114965304	-0.316093	0.00443224	0.898453	2.5311	1.75056	1.60511	2.25584	2.54389	2.13755	2.41731	2.58291	1.94889
38705935	Island17000	chr13:114965310-114965311	-0.264619	0.107587	-0.628692	2.54919	3.40648	0.619234	2.28188	2.92586	1.78618	2.63721	3.48073	0.923297
38705937	Island17000	chr13:114965323-114965324	-0.349145	0.0860997	-1.06305	4.29873	3.99243	1.99954	3.32876	3.93908	2.66949	3.56769	3.53084	0.827259
38706057	Island17000	chr13:114965820-114965821	-0.28307	0.120827	0.434207	2.65712	2.62976	0.611838	2.66923	2.97178	2.09773	2.69084	2.53476	2.09773
38706059	Island17000	chr13:114965826-114965827	-0.370957	0.0240681	-0.153491	2.2512	1.79466	0.0558148	2.43224	2.88562	1.78049	2.37911	2.81865	2.77899
38706061	Island17000	chr13:114965839-114965840	-0.266956	0.159638	-1.57397	2.71739	2.13813	0.395257	1.7567	2.96443	2.14568	3.3442	3.4585	3.07559
38803321	Open Sea	chr14:23479856-23479857	-0.203444	0.043842	3.30462	6.1748	1.74216	3.63323	5.20675	1.39892	1.00848	3.3422	1.53836	4.18775
39072439	Open Sea	chr14:39902973-39902974	-0.305602	0.00290118	4.82786	3.67069	2.54987	4.18859	4.42048	3.1249	3.82187	3.83477	4.34318	6.38104
39072441	Open Sea	chr14:39902983-39902984	-0.221203	0.0298248	3.12212	5.26481	4.50583	4.50583	1.84218	3.46805	1.56912	3.58895	1.08724	4.79641
39072443	Open Sea	chr14:39902991-39902992	-0.265102	0.0388948	2.19529	4.48094	2.37174	3.70665	2.61134	4.56353	1.62519	2.45636	2.19529	2.97538
39072451	Open Sea	chr14:39903143-39903144	-0.241376	0.0379553	2.42541	2.76227	3.91469	2.55173	1.61694	2.30291	2.31903	2.72119	2.76227	-0.217665
39375837	Open Sea	chr14:60432295-60432296	-0.411447	0.0230794	3.70009	-0.326811	4.11722	3.02435	3.02435	3.66332	3.16146	2.68004	2.87954	2.82413
39398227	Open Sea	chr14:61748243-61748244	-0.248169	0.0453533	2.65656	2.19004	3.52332	2.93344	3.45029	2.2593	1.82592	3.31162	2.0389	5.51767
39513105	Open Sea	chr14:68067248-68067249	-0.225194	0.04913	2.952	2.46829	1.34634	2.20571	-0.090029	0.800528	3.0398	3.15101	2.79652	3.25605
39703305	Open Sea	chr14:76734612-76734613	-0.235934	0.0475856	1.89197	1.84317	2.39276	2.66387	1.55408	1.87926	1.23123	1.01083	-0.62955	1.48373
39703307	Open Sea	chr14:76734651-76734652	-0.254272	0.0215236	2.345	2.61356	3.00868	3.14141	2.94968	2.70129	1.94679	0.718986	-0.676692	1.70174
40086553	Open Sea	chr14:97058739-97058740	-0.238736	0.0164298	1.57523	2.34706	3.61981	2.08373	3.28751	2.75402	1.96852	2.13875	2.61038	3.64344
40086561	Open Sea	chr14:97058777-97058778	-0.272351	0.009897	2.35144	3.82207	2.4727	3.48493	2.11444	3.93833	2.21775	2.59209	3.45745	2.35144
40489577	Open Sea	chr15:23157727-23157728	-0.272706	0.0108832	4.76772	5.63859	5.11288	2.92236	4.7327	6.7028	4.27443	5.05131	4.12119	1.4396
40498401	Island17826	chr15:23454144-23454145	-0.145198	0.265098	1.76421	0.403824	0.609943	1.28719	1.16488	1.33537	0.790297	1.66742	0.799572	0.558413
40498403	Island17826	chr15:23454160-23454161	-0.105256	0.190389	1.12427	0.292619	0.352023	0.928589	0.479316	1.05658	0.760424	0.665697	1.5401	1.5401
40498405	Island17826	chr15:23454173-23454174	-0.182533	0.102148	0.988847	1.18632	1.23176	1.59887	1.07673	1.45853	1.98481	1.54907	1.98481	1.98481
40498407	Island17826	chr15:23454186-23454187	-0.168692	0.137	0.908454	0.783377	1.58979	1.41315	1.15621	1.35133	1.40493	1.2887	1.58979	0.706575
40498409	Island17826	chr15:23454199-23454200	-0.230722	0.00459369	1.2679	1.44988	1.18992	1.1845	0.628058	1.26962	1.44988	1.35889	1.44988	1.44988
40498411	Island17826	chr15:23454203-23454204	-0.255314	0.209112	0.795438	1.37672	0.771088	1.39202	1.4018	1.09651	1.84309	1.774	1.32573	1.98859
40498413	Island17826	chr15:23454217-23454218	-0.259895	0.0634624	1.24895	1.19264	1.0482	1.16408	0.989877	1.24579	1.41162	1.24539	1.07671	1.41162
40498415	Island17826	chr15:23454221-23454222	-0.279286	0.0122524	1.50434	1.21408	1.50434	1.01847	1.29739	1.28305	1.24445	1.42277	1.50434	1.50434
40498417	Island17826	chr15:23454223-23454224	-0.305016	0.174578	0.973536	1.73064	1.82824	1.32721	1.68906	1.54902	1.92728	1.73614	1.42898	2.32927
40498419	Island17826	chr15:23454232-23454233	-0.238087	0.0400796	1.11727	1.1096	1.36899	1.244	1.26967	1.44379	1.3553	1.41462	1.31158	1.50589
40498421	Island17826	chr15:23454252-23454253	-0.291124	0.00954027	1.50955	1.5424	1.70118	1.17192	1.46963	1.50032	1.70118	1.52476	1.70118	1.70118
40498423	Island17826	chr15:23454254-23454255	-0.353326	0.0208486	1.99283	1.59461	2.24482	2.10489	1.77175	1.83082	2.21567	2.11209	2.40031	2.40031
40498425	Island17826	chr15:23454259-23454260	-0.293066	0.0104094	1.87646	1.07281	1.70345	1.87646	1.73805	1.79762	1.01739	1.6671	1.87646	1.87646
40498427	Island17826	chr15:23454268-23454269	-0.303968	0.0278991	1.13159	2.08441	1.87369	1.45225	1.77078	1.11138	2.28786	1.5333	1.04702	1.97905
40498539	Island17826	chr15:23455004-23455005	-0.332783	0.213599	2.10072	1.07637	0.773948	1.718	0.906625	1.63428	1.52663	1.47003	1.60318	1.78976
40498541	Island17826	chr15:23455006-23455007	-0.389677	0.107307	1.75105	2.0127	2.04261	1.60688	1.25317	2.0127	2.55326	1.9322	2.76028	2.42387
40498543	Island17826	chr15:23455015-23455016	-0.343134	0.0218882	2.25726	1.90424	1.63948	1.94837	1.45415	2.30754	1.84873	2.06637	2.06069	1.63948
40498545	Island17826	chr15:23455029-23455030	-0.36775	0.107811	1.33213	1.85396	1.76201	1.86481	2.15255	2.13713	1.72917	1.79712	2.3531	1.5108
40498547	Island17826	chr15:23455045-23455046	-0.345948	0.00754954	1.75236	2.06425	2.08614	1.5983	1.45466	2.49984	1.77564	1.84492	2.22358	2.51338
40498549	Island17826	chr15:23455067-23455068	-0.341843	0.0262791	1.95066	1.882	1.72507	2.38132	1.37644	2.12611	2.26648	2.61497	2.71996	2.15663
40498551	Island17826	chr15:23455085-23455086	-0.380341	0.00357042	1.76152	2.4722	1.51645	1.60631	1.1689	2.23194	2.48582	2.41684	2.41339	2.26296
40498553	Island17826	chr15:23455094-23455095	-0.346144	0.00820488	2.55104	2.5774	2.14455	1.16886	0.690989	1.78599	2.24422	2.28663	2.14455	2.29852
40498555	Island17826	chr15:23455121-23455122	-0.330408	0.0144811	1.64106	2.12062	2.06109	1.71472	1.31694	1.85429	1.95376	2.08231	2.23277	2.34332
40498557	Island17826	chr15:23455135-23455136	-0.345298	0.0862777	1.28625	2.10017	2.14969	1.75552	1.38654	2.42282	2.23339	2.16888	2.42282	1.91219
40498559	Island17826	chr15:23455141-23455142	-0.346496	0.066198	2.26496	1.73291	2.03014	1.7426	1.65765	2.29921	2.46145	2.22701	2.46145	1.92558
40498561	Island17826	chr15:23455172-23455173	-0.324013	0.0138641	2.01737	1.65313	1.60394	1.90634	1.19298	1.99506	2.00453	1.97924	1.85104	1.58561
40498563	Island17826	chr15:23455187-23455188	-0.339317	0.101548	2.44076	1.74036	1.73422	1.7248	0.722464	1.97091	2.09056	2.21128	2.22597	2.08278
40498565	Island17826	chr15:23455203-23455204	-0.285634	0.058305	1.19117	1.38179	1.33046	1.68505	0.647897	1.48582	1.55334	1.81204	1.67407	0.901422
40498595	Island17826	chr15:23455482-23455483	-0.280722	0.142716	2.78654	1.72843	1.25607	0.547517	1.21178	2.63774	0.974731	2.59265	3.38172	2.63774
40498597	Island17826	chr15:23455490-23455491	-0.273726	0.0369725	2.52146	1.80639	1.64137	0.614606	1.89881	2.14634	2.52146	1.80957	2.52146	2.52146
40498599	Island17826	chr15:23455493-23455494	-0.257688	0.26495	1.44802	2.00854	1.73762	0.703024	1.86487	2.24864	2.62527	1.95577	3.13738	-0.0928217
40498601	Island17826	chr15:23455502-23455503	-0.296695	0.0111763	3.01604	1.82469	1.85153	2.04274	1.55023	2.29253	2.47228	2.26117	2.99881	3.15816
40498603	Island17826	chr15:23455504-23455505	-0.318238	0.0940695	3.2091	2.84871	3.1667	0.77936	2.64686	2.93188	2.75747	2.25975	2.14914	3.42109
40498605	Island17826	chr15:23455508-23455509	-0.239281	0.0295556	2.78312	2.78312	2.71722	0.19292	2.19684	2.91242	2.831	2.64405	3.03849	1.93188
40498607	Island17826	chr15:23455514-23455515	-0.213532	0.287441	2.89222	1.3362	2.83147	0.462148	1.76747	1.83148	3.12764	1.9301	1.71516	2.29299
40498609	Island17826	chr15:23455528-23455529	-0.19806	0.0420887	2.91265	2.40024	2.25384	1.26562	2.03542	2.36882	2.28378	2.17148	2.91265	2.91265
40498611	Island17826	chr15:23455586-23455587	-0.127741	0.0873432	1.53998	0.655566	0.266611	0.0543833	1.38517	1.14782	1.62062	1.59385	1.21456	1.07454
40498613	Island17826	chr15:23455593-23455594	-0.225169	0.111989	1.71786	2.49972	1.62078	-0.0453906	1.40062	2.30775	2.75858	1.78358	1.54328	1.55893
40498615	Island17826	chr15:23455597-23455598	-0.228084	0.0823489	1.93198	1.99225	1.52553	0.696451	1.0882	1.6949	2.14293	2.03263	1.67416	2.14293
40498617	Island17826	chr15:23455599-23455600	-0.0798931	0.775121	0.349303	1.97192	1.44545	0.244125	0.371613	0.848553	1.19401	0.0984854	0.222877	-1.37145
40716251	Open Sea	chr15:32933835-32933836	-0.231876	0.00976641	2.4492	0.566205	4.86988	4.01673	2.07831	3.69984	1.58728	3.63224	3.16779	1.79853
40716261	Open Sea	chr15:32933915-32933916	-0.204325	0.0483968	0.963769	1.14297	3.85989	2.14032	0.528219	1.38051	1.71042	2.06071	1.93561	3.95039
40924571	Open Sea	chr15:43214058-43214059	-0.254184	0.0151424	2.52759	-0.0863081	7.1413	5.27096	4.48138	1.74774	6.39344	4.01333	5.23477	4.34079
40981323	Open Sea	chr15:45671122-45671123	-0.214074	0.0413572	3.94732	1.61561	3.35409	2.42447	5.42512	4.02304	2.76871	3.04413	2.53837	1.79816
41157981	Open Sea	chr15:56757639-56757640	-0.266382	0.0479477	2.49038	3.70348	5.92809	1.80857	1.89754	3.12429	5.5227	1.40313	3.05491	4.46388
41201023	Open Sea	chr15:59157629-59157630	-0.232182	0.0362157	0.858173	1.84837	3.94556	1.10902	2.42599	3.4657	2.18211	1.50553	2.5551	2.66987
41331763	Open Sea	chr15:65197670-65197671	-0.224984	0.00838744	3.33029	3.70647	3.33029	2.09103	2.8248	2.2274	1.7649	4.29425	0.686187	-0.16219
41664803	Open Sea	chr15:79164640-79164641	-0.308226	0.015143	2.00706	1.41313	5.43087	1.14529	2.93094	2.06362	3.23451	2.69744	4.31077	3.48288
41664809	Open Sea	chr15:79164750-79164751	-0.280273	0.00458529	2.6844	2.31856	3.5651	1.9446	2.6391	2.73832	3.53203	1.45199	4.24908	3.68085
41884845	Open Sea	chr15:89922843-89922844	0.271855	0.0096744	-1.96482	-1.28751	-2.16237	-2.57267	-2.36289	-1.48748	-1.40039	-2.2809	-0.790811	-1.1972
41884893	Open Sea	chr15:89924975-89924976	0.254533	0.000626104	-3.39335	-1.09292	-4.43474	-2.38952	-2.31097	-2.54829	-1.97116	-3.06824	-2.69667	-4.92908
41885119	Open Sea	chr15:89935270-89935271	0.345373	0.0136227	-2.63093	-3.06047	-2.90934	-1.94757	-2.69775	-2.43914	-1.68213	-2.82796	-0.980152	-1.24686
41934027	Island18493	chr15:91473315-91473316	-0.0768046	0.00800566	1.14143	4.06136	3.6383	6.17408	3.73159	1.05841	9.38916	6.00906	7.5461	8.5607
41934029	Island18493	chr15:91473330-91473331	-0.0777389	0.025125	1.37801	3.30723	4.32632	6.09941	5.24033	0.639285	12.6123	5.05272	8.85866	6.41489
41934031	Island18493	chr15:91473341-91473342	-0.0697841	0.0674642	2.3909	3.23276	4.41396	5.64408	5.2165	0.659558	9.89337	4.51823	7.3253	2.3909
41934033	Island18493	chr15:91473344-91473345	-0.0656819	0.0413572	1.95304	2.04181	2.4281	3.94034	4.91311	0.528468	7.88067	3.74332	5.73445	1.87166
41934035	Island18493	chr15:91473348-91473349	-0.0641777	0.0139745	1.20306	0.878428	2.91268	6.149	5.35558	0.683222	10.062	4.77077	6.91762	2.5155
41934037	Island18493	chr15:91473351-91473352	-0.0706557	0.029208	2.49294	1.67494	2.82095	6.30566	5.27195	0.705238	10.9181	4.70159	7.81639	2.23326
41934039	Island18493	chr15:91473359-91473360	-0.074317	0.153843	5.50687	1.19154	3.99518	5.78026	7.27693	0.98432	14.0962	5.03097	9.26155	3.23419
41934041	Island18493	chr15:91473365-91473366	-0.0691708	0.0429883	1.72919	1.13184	3.77279	4.66883	5.98567	1.0551	13.2449	5.03039	8.68619	3.27637
41934043	Island18493	chr15:91473375-91473376	-0.0680159	0.0404575	1.39266	0.876862	2.95941	4.05862	4.73506	0.98647	11.5746	2.7213	4.85647	3.38218
41934045	Island18493	chr15:91473386-91473387	-0.0631636	0.457925	1.77998	0	2.10961	3.55996	5.69594	0	17.4042	4.98394	3.16441	4.06853
41934047	Island18493	chr15:91473396-91473397	-0.0725609	0.567951	2.23807	0	5.22217	4.82046	7.16183	0	17.0907	4.94732	5.87494	4.17774
41934061	Island18493	chr15:91473473-91473474	-0.0520113	0.808281	0	8.47788	0	10.4964	4.74032	0	15.4684	4.32206	0	0
41934063	Island18493	chr15:91473475-91473476	-0.0493004	0.740883	0	7.69855	0	9.53153	2.08502	0	14.0465	4.00324	0	0
41934065	Island18493	chr15:91473477-91473478	-0.0409853	0.916495	0	9.23211	0	11.8699	0	0	13.1193	4.88759	0	0
41934067	Island18493	chr15:91473498-91473499	-0.0608181	0.0304014	5.80338	11.6068	0	12.0532	3.3697	0	10.9959	7.08209	8.70507	6.96405
41934069	Island18493	chr15:91473511-91473512	-0.0579311	0.0505888	3.80716	8.56612	0	7.99504	0	1.77668	7.99504	7.26822	6.95221	5.71074
41934071	Island18493	chr15:91473542-91473543	-0.0625825	0.193223	2.20208	4.74824	0	5.62755	0	2.61972	7.79199	4.79102	4.60436	3.89599
41934073	Island18493	chr15:91473569-91473570	-0.0718723	0.00011558	4.06921	9.06852	0	8.35258	2.46045	5.96053	16.2768	10.3219	16.0302	7.05329
41934075	Island18493	chr15:91473573-91473574	-0.0649468	0.00419922	4.11854	6.29894	0	8.45384	2.43368	5.949	15.864	10.1983	13.3852	6.69262
41934077	Island18493	chr15:91473586-91473587	-0.0633767	0.0917171	5.33345	3.85194	0	3.55563	3.15159	4.74896	9.90498	7.37605	8.40423	4.07852
41934079	Island18493	chr15:91473591-91473592	-0.0732765	0.000394653	13.7785	6.70308	0	6.35933	5.3916	8.37884	20.6678	10.7832	15.5009	7.29452
42140761	Open Sea	chr15:101389269-101389270	-0.27399	0.0042745	2.41633	2.58922	2.68307	2.17115	0.927481	2.22895	2.83126	2.11996	2.78244	1.42689
42140763	Open Sea	chr15:101389272-101389273	-0.27994	0.0255022	2.52127	2.15111	3.10295	1.78095	1.01886	2.9377	2.07318	1.32854	1.9866	2.4928
42140767	Open Sea	chr15:101389349-101389350	-0.334664	0.00271895	2.40637	2.98059	2.07458	3.15228	1.48247	3.73604	2.06091	1.83883	3.73604	2.60501
42140769	Open Sea	chr15:101389354-101389355	-0.323874	0.00467295	1.63334	2.3219	2.71385	2.04648	1.42677	1.72031	2.82111	1.81589	3.0203	2.04648
42140771	Open Sea	chr15:101389387-101389388	-0.378531	0.00121625	2.54054	4.24661	3.719	4.26651	2.47445	3.22223	3.8328	2.69039	3.79627	3.54513
42140773	Open Sea	chr15:101389394-101389395	-0.384191	0.00236026	2.1471	2.70269	3.49244	3.07414	1.76219	4.25655	3.44165	2.61202	4.94968	4.33416
42140775	Open Sea	chr15:101389401-101389402	-0.414	0.000268841	2.48026	4.27616	3.38602	3.65576	3.33207	3.90119	3.69333	3.29472	5.44181	4.57287
42140777	Open Sea	chr15:101389405-101389406	-0.363268	0.00954066	1.58946	3.17113	3.6857	3.55961	2.38215	3.90636	3.43042	2.12	4.58409	4.22267
42140779	Open Sea	chr15:101389450-101389451	-0.407159	0.00144747	2.91185	2.85729	4.42376	3.85441	1.77191	4.76027	3.2531	2.75189	4.61808	4.33371
42140781	Open Sea	chr15:101389482-101389483	-0.311522	0.0154319	1.8018	2.70991	2.83736	3.31531	2.22417	3.48828	3.62981	1.70654	4.20561	3.22072
42140783	Open Sea	chr15:101389495-101389496	-0.333161	0.00825033	1.94301	3.15648	3.68048	3.20888	1.24672	2.90945	4.04325	2.55606	3.73288	2.64184
42140785	Open Sea	chr15:101389568-101389569	-0.419177	0.00022675	3.82758	4.39294	4.28024	4.63279	2.67227	6.60352	5.21306	3.6857	5.59905	5.66751
42140789	Open Sea	chr15:101389672-101389673	-0.401942	0.000284523	9.81235	5.30898	8.35848	8.72914	4.07104	11.4822	8.17846	4.90787	8.3172	8.36236
42140793	Island18566	chr15:101389733-101389734	-0.414735	0.000134519	6.27971	7.87267	8.14692	8.42759	5.60652	9.4062	9.93468	5.81421	10.951	7.91093
42140795	Island18566	chr15:101389745-101389746	-0.483593	8.56108e-05	6.41371	5.46512	7.18227	6.61811	3.39827	8.71837	6.09144	5.54212	8.09933	8.3186
42140797	Island18566	chr15:101389763-101389764	-0.513697	0.000141542	6.18687	5.3256	5.50341	5.64922	3.75896	8.00208	4.89589	4.93061	6.36109	6.80524
42140799	Island18566	chr15:101389765-101389766	-0.355074	0.216925	5.48839	5.84903	5.36913	5.95917	4.5783	7.44792	7.31386	6.08819	7.8615	7.63163
42140801	Island18566	chr15:101389774-101389775	-0.437768	0.00160155	8.15407	5.97169	5.75261	7.72929	3.93499	8.02178	3.57826	5.99291	8.94354	8.43791
42140803	Island18566	chr15:101389784-101389785	-0.442893	0.081758	7.08919	5.21002	6.01046	8.31998	4.2126	9.1775	7.61318	8.0118	10.0061	10.5635
42140805	Island18566	chr15:101389788-101389789	-0.421388	0.000528076	6.12778	6.47445	5.66402	8.27447	3.89552	8.45953	6.28185	6.4502	9.40486	8.82231
42140807	Island18566	chr15:101389811-101389812	-0.377706	0.000376368	3.96303	7.01983	8.89201	7.85273	4.36485	9.78349	9.57093	5.43453	9.15509	6.73643
42140809	Island18566	chr15:101389836-101389837	-0.326985	0.0026249	5.08116	6.04258	3.92996	6.84766	2.74737	8.6111	5.23995	6.75904	13.5286	6.92121
42140811	Island18566	chr15:101389845-101389846	-0.314618	0.000231401	8.77031	9.66691	6.9853	11.5452	4.93034	10.7868	11.8359	8.37307	9.04249	7.2123
42140813	Island18566	chr15:101389867-101389868	-0.213429	0.403425	5.57275	8.92349	5.29203	12.0703	5.26687	16.8001	10.2728	5.60099	16.2261	7.42551
42140815	Island18566	chr15:101389882-101389883	-0.198113	0.131655	7.84537	6.91145	7.27464	16.2958	3.36455	14.4853	11.6564	5.44832	17.9282	4.61125
42140817	Island18566	chr15:101389905-101389906	-0.216374	0.0657494	16.1524	4.96996	9.69143	8.07619	6.92245	16.1524	14.9099	9.5014	22.026	4.0381
42140821	Island18566	chr15:101389926-101389927	-0.0616572	0.338088	6.52698	1.35315	2.13382	2.77397	7.56536	1.49944	9.64858	1.04678	5.54793	3.69862
42140825	Island18566	chr15:101389949-101389950	-0.14399	0.219834	8.57367	6.38465	2.32169	5.36525	1.62874	12.4273	7.55734	1.10139	2.64507	3.83079
42140827	Island18566	chr15:101389958-101389959	-0.0483609	0.42748	3.85149	5.37417	1.84871	2.7187	1.10043	2.80108	7.70298	1.88644	0	0
42140837	Island18566	chr15:101390005-101390006	-0.104638	0.18379	8.66088	4.33044	3.8974	3.8974	3.02247	12.7439	2.11109	1.83022	10.1266	-0.866088
42140839	Island18566	chr15:101390008-101390009	-0.0878187	0.447266	4.27599	5.03956	4.86578	4.70359	9.79914	11.199	3.13573	0.88747	3.61815	0
42140841	Island18566	chr15:101390013-101390014	-0.20616	0.265462	15.2678	4.31659	3.06176	9.8378	6.02528	12.0737	5.49759	3.06176	7.40538	7.10508
42140843	Island18566	chr15:101390023-101390024	-0.199105	0.286767	7.10597	5.49315	6.48565	8.71878	5.90493	9.79399	4.13499	4.41794	7.10597	5.08995
42140845	Island18566	chr15:101390030-101390031	-0.241079	0.673384	10.8925	2.97315	4.74458	5.76923	4.33472	5.60243	3.97609	1.4657	7.56237	5.76923
42140847	Island18566	chr15:101390032-101390033	-0.13006	0.42881	9.32354	0.369059	2.54241	6.37047	1.92992	6.69859	2.23616	2.23616	4.07363	3.83186
42140849	Island18566	chr15:101390044-101390045	-0.18192	0.105327	9.73273	2.11422	8.96243	4.04652	1.99625	9.63003	6.95965	-0.214477	3.62169	4.85147
42140851	Island18566	chr15:101390046-101390047	-0.161548	0.431754	11.384	4.88395	9.40177	2.16998	3.59597	7.34333	3.79968	1.52728	6.2895	2.62029
42140853	Island18566	chr15:101390058-101390059	-0.170963	0.547166	9.43462	2.47077	9.22733	2.36772	7.31455	15.2989	8.96349	0.0775145	7.13133	0.797292
42337507	Open Sea	chr16:2286482-2286483	-0.209031	0.00225877	3.48668	1.51674	3.39059	2.58069	2.43712	2.34733	2.14448	0.9853	2.47353	3.12978
42602375	Island19054	chr16:10912664-10912665	-0.35485	0.00414156	4.09699	1.22286	5.02978	1.92046	3.40446	5.8503	5.54801	4.83545	4.04967	4.09699
42602379	Island19054	chr16:10912677-10912678	-0.317358	0.00310405	1.23988	2.72774	2.15348	2.52568	2.21483	3.94006	3.75558	3.36026	3.81883	2.89305
42602381	Island19054	chr16:10912683-10912684	-0.29359	0.00516681	1.12593	2.9316	3.91294	1.69701	2.46676	4.46762	2.42131	3.82599	3.8766	3.38453
42602383	Island19054	chr16:10912696-10912697	-0.299019	0.00819481	1.85779	3.10573	2.69733	0.677578	2.49264	3.02282	3.51882	3.19921	3.2922	2.50775
42602385	Island19054	chr16:10912699-10912700	-0.220734	0.0393454	0.152953	1.86242	2.71032	1.04714	1.50913	2.74202	2.43632	2.35454	2.77782	1.71777
42602387	Island19054	chr16:10912707-10912708	-0.27263	0.00712535	3.44823	3.55101	2.76494	1.75951	3.79979	4.29613	5.00304	4.09413	4.77827	2.40466
42602389	Island19054	chr16:10912718-10912719	-0.144242	0.213545	1.29317	1.13746	1.97042	2.24474	1.46396	2.24474	2.24474	2.06186	0.943443	1.05061
42602391	Open Sea	chr16:10912758-10912759	-0.201493	0.00422659	2.56486	1.17328	2.50951	2.65342	2.68939	2.50074	2.24443	2.37297	2.04395	1.87302
43133661	Open Sea	chr16:30573054-30573055	-0.265526	0.0406417	2.51586	2.37618	2.85794	3.56946	1.07914	3.2959	2.00148	4.08827	1.3756	2.69323
43133663	Open Sea	chr16:30573075-30573076	-0.266373	0.0277382	3.14023	0.994784	3.61222	4.87916	0.870622	4.67422	2.68171	5.02821	0.0177832	4.71355
43300975	Open Sea	chr16:48656704-48656705	-0.22647	0.0151523	3.48823	3.68778	3.81461	2.65059	1.85464	3.02925	1.59434	1.86415	3.02925	1.00975
43300977	Open Sea	chr16:48656724-48656725	-0.240976	0.0352092	3.15002	1.27514	3.3854	1.46055	1.92782	1.93706	2.13358	1.4827	2.66202	1.63682
43300987	Open Sea	chr16:48656768-48656769	-0.217016	0.00498661	2.10589	2.31377	1.98506	1.0587	1.75347	2.19884	1.14692	1.53904	1.50785	1.58805
43315439	Island19453	chr16:49499212-49499213	-0.233715	0.170959	2.1005	0.338505	3.5083	1.4142	0.858622	1.50062	0.858622	2.62953	2.34016	0.63639
43315443	Island19453	chr16:49499275-49499276	-0.30461	0.183409	0.354261	0.729992	2.83409	2.04054	2.83409	1.98081	1.4419	1.78204	1.77603	2.83409
43315445	Island19453	chr16:49499278-49499279	-0.253812	0.290313	1.66992	0.934024	2.12278	1.78314	2.12278	1.6196	2.12278	1.61331	2.12278	0.764202
43315447	Island19453	chr16:49499289-49499290	-0.222116	0.000947339	1.81096	0.598263	1.81096	1.40247	1.81096	1.81096	1.81096	1.39143	1.81096	1.81096
43315449	Island19453	chr16:49499303-49499304	-0.291897	0.0860247	1.99234	0.325702	1.75596	2.41444	3.18268	1.63053	1.43249	1.78732	3.12457	2.31467
43315451	Island19453	chr16:49499352-49499353	-0.29784	0.0338122	0.176937	1.65519	2.4204	2.59507	3.22909	2.47104	0.956932	2.52718	3.17555	2.57344
43315453	Island19453	chr16:49499367-49499368	-0.266443	0.123236	1.6456	1.79063	1.68427	2.55359	3.10847	0.833455	0.363266	2.2257	1.88447	1.10693
43315455	Island19453	chr16:49499376-49499377	-0.218339	0.0705504	2.02807	0.727778	2.02807	2.02807	1.703	1.81136	1.31291	1.86554	1.13412	2.02807
43315457	Island19453	chr16:49499385-49499386	-0.256508	0.0206907	1.72287	1.09408	1.36356	1.58314	2.03726	1.94479	1.69292	2.1908	1.91936	1.36356
43315461	Island19453	chr16:49499404-49499405	-0.301975	0.0986977	2.137	1.14839	2.79608	1.38377	2.79608	1.9972	2.137	2.61795	2.79608	2.3567
43787845	Open Sea	chr16:71599468-71599469	-0.294141	0.00586846	2.42333	2.00238	5.70678	1.64619	4.20377	4.64838	5.50349	5.35949	4.8808	2.38825
43787849	Open Sea	chr16:71599475-71599476	-0.25725	0.0183167	3.88139	2.45713	6.15378	2.87536	3.57242	5.65092	5.38477	5.06634	6.6502	2.61978
43787851	Open Sea	chr16:71599554-71599555	-0.316195	0.00699485	3.00707	2.83891	4.80076	1.77981	3.73783	3.56927	4.47463	3.91279	4.35234	2.85332
43787853	Open Sea	chr16:71599556-71599557	-0.342092	0.00360171	3.27677	2.68437	4.70834	2.28023	3.17948	3.33487	5.46488	4.52137	4.40391	3.16401
43993681	Open Sea	chr16:80966698-80966699	-0.28203	0.00579106	4.41809	1.33067	7.93838	4.60884	2.73005	6.23089	4.0772	6.97165	3.0755	4.12096
44512131	Open Sea	chr17:2951743-2951744	-0.207944	0.0134024	1.49854	1.03456	2.51198	2.89049	0.567306	1.36172	2.85735	2.58789	2.98602	2.6585
44657587	Open Sea	chr17:7209982-7209983	-0.299253	0.0241373	4.74144	3.0494	3.85487	4.03998	3.207	3.85487	4.26716	4.52867	3.48466	0.806036
44657591	Open Sea	chr17:7210025-7210026	-0.276249	0.0146731	1.69618	3.29717	6.33855	0.594204	1.90906	7.8727	5.64493	3.83793	6.018	1.77489
44657593	Open Sea	chr17:7210027-7210028	-0.268036	0.0184734	3.36559	2.54709	5.36183	0.97364	1.97294	6.73248	3.61781	4.06464	4.19102	0.915527
44848567	Open Sea	chr17:14212956-14212957	-0.275342	0.00276511	3.13845	2.14333	4.20397	2.5712	1.92829	3.80085	2.07627	2.5327	5.96693	3.66152
44848571	Open Sea	chr17:14213064-14213065	-0.309812	0.00296897	2.99426	1.83739	2.11879	2.61828	2.22972	2.74843	3.0521	3.03876	2.65772	3.19546
44848577	Open Sea	chr17:14213096-14213097	-0.282841	0.0146955	3.41841	1.62757	1.68963	1.56225	2.46346	3.02389	2.41147	2.49639	3.05762	3.3765
45009869	Open Sea	chr17:19627806-19627807	-0.22968	0.0492702	4.35228	1.87711	2.27521	0.555138	-0.214218	3.44357	2.32714	5.26451	1.53958	1.17559
45037519	Island20506	chr17:20687677-20687678	-0.357246	0.0104914	3.38343	2.74811	3.40287	2.76329	3.65168	4.31976	3.19183	3.1437	4.19479	3.15989
45037521	Island20506	chr17:20687681-20687682	-0.344526	0.553454	3.5426	2.24864	1.55992	2.26345	3.89816	5.59871	4.23827	3.88845	4.01963	2.32516
45037523	Island20506	chr17:20687683-20687684	-0.403994	0.0177331	2.10726	3.27995	4.57802	4.90516	4.28828	5.97525	4.71324	4.49689	2.89748	4.17238
45037525	Island20506	chr17:20687696-20687697	-0.356091	0.517462	4.04526	3.42576	3.33287	2.79785	4.08794	5.47853	3.59295	4.31505	3.66726	2.55263
45037527	Island20506	chr17:20687698-20687699	-0.417029	0.383204	2.06098	3.26409	6.29565	5.57615	4.51132	6.31417	4.3977	5.27404	3.86204	2.54789
45037529	Island20506	chr17:20687702-20687703	-0.29792	0.790572	1.23127	3.75419	4.41732	3.3961	2.44764	6.5294	3.08277	4.51016	4.04297	3.89742
45037531	Island20506	chr17:20687747-20687748	-0.282006	0.0197992	5.21243	1.20646	7.24654	5.27225	2.41072	7.53713	1.39158	4.75945	5.38931	1.90698
45037533	Island20506	chr17:20687753-20687754	-0.252849	0.274923	6.38102	2.87086	7.84526	4.84932	1.47475	5.72257	2.87086	4.60482	5.33103	2.87086
45037535	Island20506	chr17:20687761-20687762	-0.238924	0.347704	8.10967	2.94079	8.76289	1.65441	4.61797	4.6409	1.50499	5.62969	4.78424	3.5372
45037551	Island20506	chr17:20687836-20687837	-0.373903	0.0158108	2.8462	1.37502	3.04092	2.80293	3.40006	3.94346	2.65522	2.67816	2.8462	3.53852
45037553	Island20506	chr17:20687845-20687846	-0.317884	0.00121625	3.51151	3.3432	4.43724	3.25115	4.00405	4.91725	3.20294	3.11218	2.85228	2.96557
45037555	Island20506	chr17:20687848-20687849	-0.399134	0.00306645	3.75022	1.71338	4.13364	3.68131	3.98758	4.68481	2.40521	2.53552	3.65734	4.46229
45037557	Island20506	chr17:20687850-20687851	-0.359679	0.0125699	3.87233	1.42286	3.87233	5.71169	3.75264	5.34084	2.77517	2.81906	3.04946	5.51807
45037559	Island20506	chr17:20687858-20687859	-0.331761	0.0106082	3.9313	2.33037	3.31112	3.31112	3.81283	4.58069	3.2174	3.26065	1.30777	3.50636
45037561	Island20506	chr17:20687860-20687861	-0.291657	0.0524708	3.31655	0.844127	3.46411	2.71834	3.18538	4.75636	2.76173	2.87701	1.17374	3.46411
45037563	Island20506	chr17:20687865-20687866	-0.268406	0.0317263	3.13177	2.50777	2.40187	3.28692	2.63743	3.45257	1.40955	2.83547	1.40955	2.53719
45037565	Island20506	chr17:20687868-20687869	-0.30818	0.00723887	2.29825	1.13089	3.58836	3.67375	3.20783	3.60012	2.7579	3.21332	1.71822	3.17378
45037567	Island20506	chr17:20687875-20687876	-0.320128	0.00280092	3.4137	2.26349	4.58948	3.77171	3.18657	4.57457	3.95892	3.23579	2.45273	2.59239
45037569	Island20506	chr17:20687881-20687882	-0.30591	0.00794983	3.0484	2.78836	4.39382	2.73009	2.81538	5.41055	4.1784	4.44815	2.53154	3.71293
45037571	Island20506	chr17:20687891-20687892	-0.270171	0.0213819	2.04502	1.42707	3.67842	3.43701	2.26177	3.8504	3.06282	3.0075	3.11371	2.63874
45037573	Island20506	chr17:20687894-20687895	-0.229438	0.0126335	1.98565	6.16003	4.35853	2.43693	3.76524	5.28232	2.43693	3.95812	2.87017	3.71115
45037575	Island20506	chr17:20687900-20687901	-0.34561	0.03235	1.61953	3.20385	4.04804	2.79208	3.8031	4.12498	2.58162	3.04262	3.25509	2.97778
45037577	Island20506	chr17:20687907-20687908	-0.33433	0.050175	1.58814	2.60714	4.71913	1.21243	2.61511	4.3866	4.18181	3.7975	2.5465	3.95204
45037579	Island20506	chr17:20687912-20687913	-0.262558	0.255446	2.94044	2.51826	3.74747	2.38645	0.967973	2.68475	3.18815	2.3635	2.76257	1.23051
45037585	Open Sea	chr17:20687981-20687982	-0.325088	0.00472843	1.65492	1.80405	2.4425	4.21946	3.56845	4.12416	4.51156	2.27993	4.38742	4.47394
45052973	Open Sea	chr17:21187357-21187358	-0.350005	0.0256511	5.17821	4.3122	2.71692	3.30186	3.40934	5.20661	4.04863	6.39915	5.90749	2.96507
45052977	Open Sea	chr17:21187364-21187365	-0.327279	0.00240662	6.34615	4.69901	3.87412	1.77937	3.71658	5.4596	4.53164	6.14257	4.26795	3.49604
45052981	Open Sea	chr17:21187420-21187421	-0.234313	0.027087	8.83257	2.97024	5.68428	1.83829	1.0847	2.42338	4.92435	6.07664	3.21451	5.07979
45469767	Island20799	chr17:40192161-40192162	-0.309542	0.0572448	4.53323	4.25435	9.08829	4.53323	1.85372	9.64721	0.68738	7.29415	7.52895	1.89781
45469769	Island20799	chr17:40192164-40192165	-0.313767	0.15732	2.93043	4.41628	7.22288	4.21816	0.976065	9.00082	1.10906	7.08489	6.21168	2.13797
45469771	Island20799	chr17:40192170-40192171	-0.311843	0.106738	2.81712	3.80691	7.99452	2.9734	0.115236	8.44333	0.899383	6.05645	6.68632	4.79671
45469791	Island20799	chr17:40192229-40192230	-0.220452	0.0690657	0.18428	4.13294	5.52841	2.18012	0.890942	6.38575	1.67035	5.18946	5.3202	2.61343
45469793	Island20799	chr17:40192255-40192256	-0.198038	0.28148	1.39067	1.62452	4.06257	2.14964	1.61801	3.17968	0.138618	1.83823	1.85534	1.5878
45469795	Island20799	chr17:40192279-40192280	-0.249727	0.0989847	1.35567	5.03997	3.83752	0.287566	2.89257	3.7645	0.441869	3.42296	2.75507	2.24301
45469797	Island20799	chr17:40192297-40192298	-0.282484	0.0149776	1.60157	4.59581	3.70729	2.39365	4.32547	4.43549	1.8869	3.41356	3.42133	2.74848
45469799	Island20799	chr17:40192302-40192303	-0.279009	0.015881	2.33728	3.70277	3.34656	1.76733	3.76214	4.07141	1.14989	2.59302	3.25065	1.38737
45469801	Island20799	chr17:40192310-40192311	-0.255424	0.0763308	1.38164	3.45693	3.43515	1.55339	3.7074	3.4797	0.952268	2.50811	3.04312	2.10827
45469803	Island20799	chr17:40192319-40192320	-0.277324	0.0375117	1.1371	3.7393	2.82853	1.41157	4.22147	3.46168	0.812425	2.50233	2.54994	3.0964
45469805	Island20799	chr17:40192331-40192332	-0.265117	0.0767885	1.46787	3.80253	4.98737	1.36281	2.90369	2.93871	0.433442	2.9831	1.27686	2.01742
45469807	Island20799	chr17:40192334-40192335	-0.24435	0.145843	0.451985	3.46522	3.03873	0.788635	2.91078	2.83518	1.11953	2.8405	0.582156	3.03873
45469809	Island20799	chr17:40192336-40192337	-0.255916	0.0775471	1.35199	4.1508	3.44727	2.27069	2.63221	2.95161	1.29967	2.80816	1.60052	3.09551
45469811	Island20799	chr17:40192348-40192349	-0.29412	0.0470894	1.39572	5.16437	5.21231	1.31148	4.0678	3.36874	1.13459	2.7206	2.23135	2.40009
45469813	Island20799	chr17:40192352-40192353	-0.297722	0.0147844	0.871705	3.67632	3.55387	0.942004	3.5375	3.67632	2.4502	3.57399	2.49777	2.8498
45469815	Island20799	chr17:40192361-40192362	-0.313393	0.01251	1.43686	4.95358	2.49418	1.97778	4.2695	3.78476	0.443125	3.37189	1.76367	4.00739
45469817	Island20799	chr17:40192405-40192406	-0.257752	0.114043	1.59066	2.86515	2.7939	0.999597	2.35745	2.53267	1.36901	2.91265	1.03654	2.88026
45488367	Open Sea	chr17:40700125-40700126	-0.253831	0.0388717	1.67028	2.2456	1.71482	2.44975	2.49874	1.74061	3.00651	1.59766	-0.244975	2.44975
45488513	Open Sea	chr17:40700868-40700869	-0.267224	0.00312397	3.11404	3.48532	1.72833	1.74212	3.01139	2.18155	3.0304	1.98494	3.14299	1.87089
45844777	Open Sea	chr17:55122747-55122748	-0.220415	0.0384352	1.06313	1.00075	3.63161	2.65092	0.525723	3.05921	3.15901	3.27307	3.85764	2.8097
45844989	Open Sea	chr17:55124043-55124044	-0.382771	0.00734739	3.47769	3.19571	4.62727	2.56542	2.44023	3.60927	5.09	3.8706	3.00773	2.30003
45844991	Open Sea	chr17:55124058-55124059	-0.406284	0.00243051	4.38473	4.31682	4.03888	3.02191	3.45094	6.00749	6.93556	6.03699	3.2906	3.45094
45844995	Open Sea	chr17:55124093-55124094	-0.341303	0.0157878	4.50353	3.01124	5.18556	2.6848	1.89202	2.86808	5.74182	5.62837	5.2055	5.31186
45844997	Open Sea	chr17:55124162-55124163	-0.330915	0.00390165	3.58705	1.58826	3.58705	3.17316	2.83811	3.25979	3.80166	3.67076	-0.315345	2.75927
46748159	Open Sea	chr18:3411931-3411932	-0.201526	0.0374001	0.76618	0.509389	2.93156	2.48242	1.77	1.6732	2.67712	1.70755	2.43375	0.892375
46893567	Open Sea	chr18:10726706-10726707	-0.323011	0.0255672	2.80533	2.04662	0.573818	2.90786	4.07411	4.52969	4.16453	2.73472	2.40754	2.89116
46942305	Open Sea	chr18:12656793-12656794	-0.207643	0.00522937	0.981271	2.28915	1.9614	2.50538	1.76044	2.28049	2.0023	1.93781	0.869485	1.03807
46983191	Open Sea	chr18:14179802-14179803	-0.405458	0.04932	1.83357	1.91006	2.5233	3.35143	2.84438	3.38767	2.05996	3.20467	3.45318	1.76015
46987733	Open Sea	chr18:14458011-14458012	-0.247707	0.000938124	1.86607	0.964899	2.10855	2.50377	2.0866	2.78346	2.4463	2.74607	2.60645	2.70971
47416171	Open Sea	chr18:45458345-45458346	-0.277442	0.0263339	4.65196	2.45239	1.65553	2.02	3.34927	3.86978	4.10741	3.67076	4.14631	3.21281
47428749	Shore	chr18:46064992-46064993	-0.215052	0.00274772	1.41905	1.44505	3.3793	2.23559	3.21429	2.23559	0.747878	1.16337	3.775	2.27133
47468241	Open Sea	chr18:47794415-47794416	-0.321801	0.0126012	1.19647	1.58105	2.22202	2.83735	1.75082	1.92901	2.08825	2.16169	2.92708	2.83735
47469663	Open Sea	chr18:47825047-47825048	-0.287384	0.0275347	2.84201	3.16335	6.8517	3.48649	4.31849	7.89889	2.14637	3.0558	7.61216	1.67787
47653193	Open Sea	chr18:59222008-59222009	-0.25401	0.0153345	2.40727	2.06324	3.97996	1.59471	3.01588	3.64678	2.95771	2.78973	1.64967	2.3614
47653195	Open Sea	chr18:59222050-59222051	-0.20643	0.0253097	1.77337	1.58968	2.69993	2.2962	1.67799	2.95343	1.29339	1.40436	3.16831	2.01864
47910119	Island22067	chr18:74499317-74499318	-0.352462	0.0928447	2.74214	2.19334	1.77211	2.99888	2.89952	3.33668	2.54043	2.1423	3.33668	1.98546
47910121	Island22067	chr18:74499328-74499329	-0.325445	0.011796	3.8863	1.46061	2.40634	3.1597	2.17966	3.4672	2.95887	2.724	3.25919	2.09987
47910123	Island22067	chr18:74499330-74499331	-0.359131	0.110314	3.63458	1.69021	2.39469	2.39469	1.75843	3.47615	2.74341	2.54705	3.63458	2.68399
47910125	Island22067	chr18:74499338-74499339	-0.36499	0.193804	3.37868	1.01215	2.47078	2.89545	2.86437	4.16944	3.01126	2.20054	3.21394	2.64065
47910127	Island22067	chr18:74499352-74499353	-0.366841	0.00210588	3.16283	1.78888	1.40951	2.67362	2.88532	3.69823	2.78451	2.39799	3.44984	3.19638
47910129	Island22067	chr18:74499368-74499369	-0.338311	0.149635	2.70176	1.92753	1.89557	2.80008	2.22423	3.54023	3.04587	2.42432	3.68492	1.76776
47910131	Island22067	chr18:74499370-74499371	-0.314861	0.291728	2.72764	1.53351	2.8915	2.8915	2.5228	3.11761	2.70488	1.8101	4.57112	1.42183
47910133	Island22067	chr18:74499372-74499373	-0.361092	0.0913169	2.52575	2.28446	2.36975	2.36975	2.88144	3.50138	2.58295	2.47635	3.64899	2.68956
47910135	Island22067	chr18:74499380-74499381	-0.350975	0.1028	1.6571	2.97474	3.86	2.92322	3.1935	4.10831	3.38409	2.97474	4.10831	3.62549
47910137	Island22067	chr18:74499404-74499405	-0.379398	0.168546	1.74628	2.51583	2.50146	3.02699	2.99571	3.85761	3.00277	3.07319	4.5285	1.90085
47910139	Island22067	chr18:74499417-74499418	-0.402165	0.0932611	2.92298	2.55472	2.93104	3.04186	2.93675	4.16755	3.48764	2.94429	4.33464	3.37139
47910141	Island22067	chr18:74499424-74499425	-0.39939	0.0474485	2.97871	2.19966	2.06218	2.93288	3.31695	3.22617	2.95654	2.6977	3.6661	3.6661
47910143	Island22067	chr18:74499433-74499434	-0.378104	0.00430133	2.32551	1.84147	2.54936	3.29551	3.41987	4.25253	4.01835	3.91466	4.33183	2.22291
47910145	Island22067	chr18:74499443-74499444	-0.344504	0.00271895	3.35032	2.77598	2.65351	3.29648	4.12646	5.0893	4.16397	5.0893	4.74839	1.73499
47910147	Island22067	chr18:74499494-74499495	-0.333066	0.00716325	2.75632	1.94748	2.93942	1.06176	2.51581	3.8513	2.60421	2.73682	4.32813	3.89715
47910149	Island22067	chr18:74499504-74499505	-0.342247	0.0109703	2.70495	1.51897	1.91918	3.18351	1.8871	3.71524	3.17313	1.76557	4.78495	3.71524
47910151	Island22067	chr18:74499511-74499512	-0.325597	0.291128	2.95661	1.62759	2.32353	2.58938	1.72198	3.38545	2.39745	2.16258	4.95013	2.45823
47910153	Island22067	chr18:74499527-74499528	-0.359828	0.00351901	3.68018	2.23026	1.46477	3.63597	2.10216	3.40875	1.48613	2.76086	4.6528	4.03681
47910155	Island22067	chr18:74499533-74499534	-0.363245	0.194053	2.45248	1.85536	2.11127	2.63908	2.3233	3.737	1.36841	2.69456	4.6917	3.59697
47910157	Island22067	chr18:74499561-74499562	-0.34712	0.00357042	3.38782	2.34022	2.61958	2.31896	2.6246	4.76426	3.24556	3.28085	3.6439	3.19576
47910159	Island22067	chr18:74499571-74499572	-0.343907	0.00696944	3.36851	2.35443	1.89441	1.4384	3.10333	4.32174	1.55	2.5167	4.13601	3.5113
47910161	Island22067	chr18:74499573-74499574	-0.346383	0.153939	2.91022	2.06333	2.29883	2.21731	2.33525	3.86532	1.12155	2.50528	4.98895	4.98895
47910163	Island22067	chr18:74499584-74499585	-0.346354	0.23025	4.19249	2.06747	3.55292	0.912119	2.8333	3.78399	2.16811	3.16636	5.05338	5.86362
47910165	Island22067	chr18:74499587-74499588	-0.377025	0.157871	4.75254	2.5418	3.23836	2.81535	3.05	5.31495	3.87615	3.55207	5.40585	6.31479
48429495	Open Sea	chr19:6372363-6372364	-0.257696	0.0101903	2.79818	1.85768	2.74933	2.15911	2.88842	2.89047	2.0559	3.25144	3.55696	2.76949
48653759	Open Sea	chr19:11910158-11910159	-0.247721	0.0188608	3.25191	1.45796	2.78511	2.65318	3.29402	1.44767	1.54489	1.55448	1.95865	4.68504
48755027	Island23279	chr19:14376741-14376742	-0.283086	0.0135597	3.04873	-0.839668	2.86095	0.672228	2.51331	3.83401	1.47817	2.73359	3.17961	2.10178
48755033	Island23279	chr19:14376770-14376771	-0.237814	0.232084	1.72152	-0.93249	1.92057	1.49403	1.5931	2.22524	-0.0415009	1.99082	2.51772	2.00588
48755035	Island23279	chr19:14376774-14376775	-0.239814	0.0809084	1.65501	-0.585723	2.51929	1.07882	1.59925	2.5009	-1.06131	2.755	2.2312	0.61787
48755037	Island23279	chr19:14376785-14376786	-0.260055	0.102187	0.73798	-1.58171	2.95937	1.43448	2.3028	3.13497	-0.502534	2.70694	3.64453	2.38238
48755039	Island23279	chr19:14376796-14376797	-0.218052	0.0136606	1.38743	-0.548834	2.36342	0.746684	0.909006	2.58869	-0.489465	2.25711	2.75543	2.13267
48755041	Island23279	chr19:14376803-14376804	-0.278637	0.193357	1.5295	-0.613871	2.15594	2.00262	1.93954	2.95841	0.162713	2.4614	3.57968	3.01019
48755043	Island23279	chr19:14376810-14376811	-0.282368	0.253798	2.65533	-1.13386	1.89872	2.91954	2.07737	3.4673	-1.39931	3.13548	4.04244	3.38742
48755045	Island23279	chr19:14376814-14376815	-0.222903	0.271202	2.32303	-0.691703	1.00262	1.79039	1.4258	2.79301	-0.677594	2.47969	2.16637	2.21458
48755047	Island23279	chr19:14376820-14376821	-0.268545	0.00889982	1.69599	-0.904132	2.38458	3.02047	2.99551	3.02047	-0.316832	2.96938	2.74588	2.35361
49012659	Open Sea	chr19:21203154-21203155	-0.274328	0.00578991	1.00366	4.95803	2.25491	3.36965	3.79215	2.82165	3.47748	2.03878	4.2141	4.66356
49131641	Open Sea	chr19:30363175-30363176	-0.304093	0.0184364	3.0596	1.21034	2.29744	1.34473	6.5641	2.23362	2.31909	3.68319	5.9158	3.04361
49309563	Island23720	chr19:36485112-36485113	-0.392079	0.294839	8.14072	1.00193	5.76112	3.97643	3.59149	4.53527	4.17473	5.52316	6.26209	3.89144
49309565	Island23720	chr19:36485126-36485127	-0.315062	0.013433	5.57673	2.93828	5.32765	2.87831	3.46297	4.0926	2.01482	3.66331	4.28149	2.77038
49309567	Island23720	chr19:36485144-36485145	-0.350209	0.401166	9.26484	2.59923	4.95997	4.42186	2.96502	3.52501	5.08658	4.95997	4.21129	1.668
49309569	Island23720	chr19:36485159-36485160	-0.399509	0.254769	9.60198	3.57359	7.03991	4.84916	3.45302	4.69683	3.9085	5.95815	6.18589	3.84857
49309571	Island23720	chr19:36485170-36485171	-0.382404	0.00069647	6.24977	3.32846	5.22125	3.96913	1.86885	4.5827	2.78169	5.14735	5.27159	3.3886
49309573	Island23720	chr19:36485179-36485180	-0.389257	0.00271886	5.70029	2.9406	4.60408	3.6449	3.47721	3.5577	2.11892	4.16528	5.82486	2.29103
49309575	Island23720	chr19:36485181-36485182	-0.423946	0.000167631	8.09955	5.68245	8.14224	4.96353	4.57899	5.81118	5.00428	7.7748	9.03881	4.37669
49309577	Island23720	chr19:36485207-36485208	-0.374494	0.00316823	5.14776	2.04173	2.93836	3.49678	2.85979	3.44324	2.11874	3.92828	4.12061	2.10294
49309579	Island23720	chr19:36485227-36485228	-0.375934	0.201842	5.6009	2.67108	2.92686	2.71294	4.50072	3.57426	1.25343	4.14784	3.76727	3.53807
49309581	Island23720	chr19:36485261-36485262	-0.432172	0.200082	6.09101	2.81915	3.90977	3.44708	4.80793	3.56536	1.45587	4.55131	4.71338	3.01161
49309583	Island23720	chr19:36485278-36485279	-0.38985	0.00458529	5.95387	3.51391	4.81607	4.69439	3.28299	3.54613	1.33575	5.62734	6.28589	1.5518
49309585	Island23720	chr19:36485282-36485283	-0.396079	0.00445311	5.82422	2.5793	3.8576	4.06655	3.14716	4.71484	0.73004	5.00297	3.81117	2.18597
49309587	Island23720	chr19:36485299-36485300	-0.3437	0.0180423	5.73864	2.18711	3.2305	2.97968	2.64861	3.68913	0.956441	4.07245	2.91837	2.82919
49309589	Island23720	chr19:36485307-36485308	-0.369945	0.0127559	4.38011	1.37802	2.9204	3.4167	3.22173	2.81011	0.915645	4.38011	4.1966	2.41397
49309591	Island23720	chr19:36485319-36485320	-0.266435	0.0474984	7.77312	1.35614	2.87595	3.68056	2.17165	2.36935	2.63082	5.36844	0.921908	4.39576
49309593	Island23720	chr19:36485356-36485357	-0.331599	0.422104	3.16887	1.30292	3.75843	2.64482	3.57946	2.23061	0.417603	3.85866	2.16395	4.17603
49309595	Island23720	chr19:36485360-36485361	-0.369817	0.0206598	3.28608	2.79243	4.70398	3.52405	3.2993	5.14224	-0.184294	4.60871	4.50477	2.77049
49316623	Open Sea	chr19:36643748-36643749	-0.345895	0.00554163	3.35153	3.66663	7.92336	1.1351	3.99912	1.53213	5.63745	2.37185	4.65777	3.8958
49316625	Open Sea	chr19:36643760-36643761	-0.326391	0.00536677	2.27309	2.73044	5.8568	1.18144	2.70314	1.74531	4.14329	1.98883	3.0159	3.73525
49316627	Open Sea	chr19:36643771-36643772	-0.317708	0.00945768	2.69011	3.07984	7.3804	1.23297	3.5176	1.44668	5.66133	2.18144	4.40403	2.72897
49316629	Open Sea	chr19:36643866-36643867	-0.284151	0.0137166	2.33035	3.84023	5.56762	0.0936946	2.59462	2.53134	5.03789	1.85948	2.64014	0.648655
49562979	Open Sea	chr19:43969966-43969967	-0.275687	0.0290174	1.63634	2.83316	2.62419	1.79306	2.30413	4.10835	1.60882	3.03263	2.22425	3.49024
49719969	Open Sea	chr19:48019053-48019054	-0.312889	0.00182567	1.34629	2.04437	3.52107	1.68286	2.16903	2.31286	1.87519	2.35601	1.59107	1.96766
49852777	Open Sea	chr19:50861281-50861282	-0.373329	0.0241373	1.15863	1.63572	2.73936	4.79665	2.96095	3.55382	3.83304	5.37711	4.34028	3.86211
49852781	Open Sea	chr19:50861336-50861337	-0.376318	0.00323515	2.24113	3.01819	1.59369	3.88987	3.98423	3.46687	4.65082	5.51729	5.42178	4.65082
49902509	Open Sea	chr19:52205989-52205990	-0.3064	0.015205	4.3635	1.81711	1.56134	3.14141	2.58355	3.07433	2.81822	3.35517	3.03031	3.28954
50246295	Open Sea	chr20:3663290-3663291	-0.267232	0.0289316	3.3926	2.50934	3.27195	3.05347	3.81086	4.54296	3.32694	2.10431	1.70535	1.92468
50386323	Open Sea	chr20:11870824-11870825	-0.243292	0.0496185	1.97617	2.50778	3.779	1.96357	3.93901	3.78967	2.125	2.1384	2.80075	2.08712
50757501	Open Sea	chr20:33145848-33145849	-0.407781	4.65008e-05	3.25008	3.85985	3.91762	4.83548	3.51431	3.7257	5.10883	2.41565	2.57062	4.38251
50757503	Open Sea	chr20:33145866-33145867	-0.311892	0.0203669	1.69	3.39404	4.56866	5.40037	2.62799	2.04579	5.78158	4.14609	2.25926	2.52017
50757505	Open Sea	chr20:33145872-33145873	-0.37992	0.000714729	2.19979	4.45495	5.44043	3.8839	2.52929	3.97747	3.79569	2.9015	1.26968	3.95777
50757507	Open Sea	chr20:33145874-33145875	-0.364498	0.000314051	2.4667	5.23043	3.73319	4.04981	4.12552	3.55927	4.15224	3.57488	2.82057	4.23312
50757509	Open Sea	chr20:33145887-33145888	-0.306994	0.0132028	0.503292	3.9752	5.19979	3.6612	3.6465	3.62057	4.9441	2.72127	1.0954	4.13385
50757511	Open Sea	chr20:33145947-33145948	-0.264636	0.0397692	0.94914	1.13345	4.48705	4.03584	1.76327	1.40377	1.49532	2.23099	-0.410972	3.35902
50800265	Open Sea	chr20:34652284-34652285	-0.219468	0.0288618	1.08144	2.45291	2.45291	1.43208	1.07219	1.69926	2.37219	2.55907	2.11263	1.41506
50850259	Open Sea	chr20:36322049-36322050	-0.302433	0.00258464	4.04522	4.13457	3.07454	2.47271	2.53034	3.57606	6.08366	2.67088	5.02162	5.88742
50850261	Open Sea	chr20:36322069-36322070	-0.327295	0.0159703	3.68185	4.00515	1.02383	3.42828	2.26444	4.16997	5.82303	4.0021	4.14073	3.26346
51004905	Open Sea	chr20:43932876-43932877	-0.378587	0.019905	4.63794	1.24895	3.2442	2.84931	3.31002	4.38501	2.3886	2.10509	2.05952	5.06071
51004907	Open Sea	chr20:43932895-43932896	-0.306309	0.0240637	3.06663	1.68307	3.21585	1.79825	2.24646	2.47847	1.52724	2.19852	2.37204	3.34242
51004909	Island25162	chr20:43932913-43932914	-0.342052	0.0846202	3.13755	0.857499	3.50795	2.94	2.45	3.49293	2.35101	1.14692	1.9303	3.98125
51004911	Island25162	chr20:43932925-43932926	-0.359357	0.00703996	2.42234	1.24342	2.98558	2.42234	3.7829	3.16918	2.87886	3.37644	2.84876	3.07451
51004913	Island25162	chr20:43932934-43932935	-0.379256	0.0470894	3.68245	1.59643	3.82928	1.20269	3.28392	3.43774	2.65465	1.38214	1.7511	3.1245
51004915	Island25162	chr20:43932940-43932941	-0.384692	0.0198742	3.38695	1.44588	3.62013	2.5904	3.62013	3.32759	2.60709	2.81566	2.38248	3.44136
51004917	Island25162	chr20:43932947-43932948	-0.347663	0.324334	3.04307	1.93852	3.33877	2.48862	2.88536	2.69715	1.0717	1.78421	1.97853	2.20524
51004919	Island25162	chr20:43932953-43932954	-0.296768	0.093891	3.80099	1.19963	3.70599	0.974697	1.96606	3.66553	1.64949	1.85712	2.13847	2.44539
51004921	Island25162	chr20:43932964-43932965	-0.359737	0.00706175	4.01845	2.05023	2.59696	1.01657	2.58329	3.58791	1.91355	1.57184	3.58791	3.65314
51004923	Island25162	chr20:43932966-43932967	-0.343349	0.00902038	3.221	2.45787	2.72376	2.05599	3.5099	3.06279	2.27174	2.06759	2.27174	3.1347
51004925	Island25162	chr20:43932979-43932980	-0.347519	0.475967	2.98051	0.663726	3.08695	1.17091	3.43671	1.40695	1.58851	1.73251	2.12893	4.04497
51004927	Island25162	chr20:43932983-43932984	-0.264525	0.260095	2.37001	0.944984	2.42534	2.46959	2.86792	2.32475	2.20405	1.49439	2.42534	1.27463
51004929	Island25162	chr20:43932985-43932986	-0.354603	0.241657	3.6571	1.19784	2.2966	2.15339	2.85922	2.32915	3.01266	1.48416	1.58055	2.15339
51004931	Island25162	chr20:43932987-43932988	-0.399914	0.326723	3.2654	1.64592	3.2654	1.68245	2.96464	1.97642	2.80269	1.09992	2.55772	2.06236
51391811	Open Sea	chr20:58662434-58662435	-0.309648	0.00973587	2.2678	4.45254	1.77127	2.06145	4.99914	2.49002	3.5317	2.43514	4.70057	2.44836
51568961	Island25527	chr20:62570270-62570271	-0.236394	0.1559	1.22147	2.57868	1.05484	0.679926	1.80466	2.38348	2.83567	0.84395	2.05461	0.388327
51568963	Island25527	chr20:62570295-62570296	-0.31693	0.0358183	2.29637	2.72824	3.02342	2.78245	2.60173	2.71674	1.33667	1.67199	3.44511	1.07034
51568965	Island25527	chr20:62570302-62570303	-0.291703	0.0236112	2.06192	2.52034	3.37429	1.54617	2.51657	2.78096	1.60464	2.02734	2.5461	2.10594
51568967	Island25527	chr20:62570311-62570312	-0.296121	0.0470894	1.29763	3.89519	3.77386	2.20993	2.78441	2.73791	1.51212	1.32909	1.49905	3.20516
51568969	Island25527	chr20:62570326-62570327	-0.24994	0.0517265	0.729941	3.27508	2.99797	0.58318	2.97523	2.69447	1.66192	1.51804	1.50159	1.83619
51568971	Island25527	chr20:62570332-62570333	-0.274747	0.0149878	1.00596	2.93059	2.79201	1.93619	2.75015	2.6455	1.82675	1.62612	2.27446	1.24863
51568973	Island25527	chr20:62570337-62570338	-0.267417	0.0209079	1.07748	2.7339	2.67506	1.14509	2.87475	2.87276	2.03512	1.88275	2.13208	1.19114
51568975	Island25527	chr20:62570347-62570348	-0.209953	0.126245	-0.129741	2.79146	2.70398	0.333508	2.33656	2.91048	1.11902	1.5204	2.65499	0.425956
51568977	Island25527	chr20:62570359-62570360	-0.278731	0.0229048	0.678407	2.68336	3.1542	1.09521	2.37012	2.76483	1.71445	1.05043	2.35305	1.86926
51568979	Island25527	chr20:62570375-62570376	-0.266778	0.00462739	0.561012	3.10553	2.76191	1.57083	2.92386	3.44042	1.55213	1.55213	2.81753	3.37627
51568981	Island25527	chr20:62570387-62570388	-0.223173	0.0630539	1.34432	2.551	3.48612	1.95356	2.38518	2.51873	0.864566	0.484851	0.625336	3.40828
51568983	Island25527	chr20:62570393-62570394	-0.25283	0.0168811	1.1677	3.10648	3.05591	2.04437	1.87096	2.45963	0.830525	1.37001	1.51661	2.34783
51568985	Island25527	chr20:62570397-62570398	-0.210966	0.0362652	1.7013	2.89912	1.35173	2.06908	1.86539	3.5018	0.599589	1.30397	0.966487	3.0468
51568987	Island25527	chr20:62570404-62570405	-0.283726	0.00866552	0.914484	4.26482	2.15395	2.5273	3.96502	2.67839	1.65303	1.05739	2.84321	3.15913
51568989	Island25527	chr20:62570415-62570416	-0.267344	0.000797964	1.45574	3.23523	3.22726	1.91245	3.30831	2.82938	1.72415	1.65766	3.30831	2.32413
51568991	Island25527	chr20:62570426-62570427	-0.271609	0.0213819	0.918903	2.87814	3.21176	1.66849	2.46747	2.90704	0.390124	1.10528	1.46027	3.26484
51568993	Island25527	chr20:62570459-62570460	-0.197135	0.0439935	0.623338	3.17902	2.24402	2.61802	2.01961	3.36602	0.858006	0.0448803	0.224402	2.4043
51568995	Island25527	chr20:62570470-62570471	-0.21553	0.0748052	0.404746	3.91642	3.76969	2.50784	1.82239	2.21523	1.28422	0.451481	0.116954	2.26749
51568997	Island25527	chr20:62570501-62570502	-0.181584	0.239161	-1.03498	1.99155	2.43959	1.20747	3.16766	2.53437	1.20747	0.790144	1.20747	2.38358
51684339	Open Sea	chr21:18985761-18985762	-0.252581	0.0211814	3.21199	1.70784	5.2683	2.0696	3.99898	3.83317	5.54248	3.07139	1.79828	2.46424
51810111	Open Sea	chr21:28219350-28219351	-0.2161	0.00599169	2.20166	3.29438	6.6779	3.76375	3.51566	4.16285	0.373687	0.938209	2.97917	4.30742
51949305	Open Sea	chr21:35445054-35445055	-0.292526	0.00419922	3.12295	2.5596	1.89188	2.90088	3.23652	1.43845	2.76902	1.77326	0.791148	2.51729
51949307	Island25653	chr21:35445088-35445089	-0.190682	0.293276	1.41789	1.51117	0.858196	0.858196	2.00743	1.22854	0.858196	1.08674	0.422879	2.16415
51949309	Island25653	chr21:35445093-35445094	-0.109621	0.312056	1.51878	1.84006	0.764291	0.360099	1.62242	1.10131	1.70404	1.11459	0.925968	0.171476
51949311	Island25653	chr21:35445095-35445096	-0.0783537	0.605208	1.49382	0.332552	0.325929	1.41072	0.364915	0.688674	0.889457	0.862518	-0.379226	2.04782
51949313	Island25653	chr21:35445115-35445116	-0.326032	0.000343222	2.90135	3.80399	2.96814	3.95273	3.45561	3.3917	3.4712	3.25796	2.46371	3.93685
51949315	Island25653	chr21:35445121-35445122	-0.357822	0.0140687	3.46406	2.44188	1.27205	2.81483	2.7826	2.579	3.25962	2.85919	1.35155	3.64991
51949317	Island25653	chr21:35445131-35445132	-0.349065	0.0026249	3.81775	1.93944	2.07048	3.77208	4.02402	3.72372	4.71451	3.73362	1.34724	4.54438
51949319	Island25653	chr21:35445147-35445148	-0.348155	0.00130987	5.09371	2.50096	2.09174	4.67156	4.42627	3.4973	4.56837	4.34799	0.853431	4.67156
51949321	Island25653	chr21:35445161-35445162	-0.337722	0.00468218	3.47614	1.45182	2.07385	3.49526	3.43519	3.08864	3.60846	3.16339	1.27536	3.86318
51949323	Island25653	chr21:35445187-35445188	-0.332055	0.267451	2.20423	1.54787	1.08084	2.93902	2.54419	2.56859	3.41598	2.85729	2.69284	3.06015
51949325	Island25653	chr21:35445214-35445215	-0.356751	0.0284708	1.66288	2.70794	2.54323	4.03956	4.98783	4.99404	4.29632	3.74698	2.43453	2.46232
51949327	Island25653	chr21:35445220-35445221	-0.321416	0.267066	2.29003	1.43472	0.765226	2.34003	3.42548	2.52449	2.54294	2.6194	2.08418	3.68986
51949329	Island25653	chr21:35445222-35445223	-0.348198	0.0106124	3.35997	1.76157	1.04638	2.96081	3.36714	3.05494	3.20611	2.98085	2.45606	3.69052
51949331	Island25653	chr21:35445224-35445225	-0.326928	0.178989	2.64	1.34259	0.446219	3.19709	3.54777	3.0924	3.69725	3.2594	1.80081	3.69725
51949333	Island25653	chr21:35445227-35445228	-0.261673	0.117874	2.87223	2.06959	0.533968	2.84783	3.04795	3.43244	2.03485	3.45643	1.47202	1.47202
51949335	Island25653	chr21:35445229-35445230	-0.285632	0.116834	3.93732	1.64555	1.32171	3.59628	3.19141	3.96363	2.90909	3.71579	3.20835	1.11353
51949337	Island25653	chr21:35445236-35445237	-0.378741	0.00355192	4.0149	2.82391	1.89759	4.39442	4.74781	4.79629	3.86366	4.33606	3.66201	5.07356
51949339	Island25653	chr21:35445249-35445250	-0.298326	0.281842	2.88854	1.87491	0.853432	2.29651	3.24453	2.52632	1.86129	2.90255	2.5164	1.72562
51949341	Island25653	chr21:35445251-35445252	-0.291128	0.137291	3.30374	1.67667	-0.074513	2.48738	3.9618	3.80016	2.5116	3.58389	1.92542	3.94632
51949343	Island25653	chr21:35445258-35445259	-0.226842	0.261209	-0.190329	1.20542	-0.452031	3.31489	4.87407	3.984	6.19928	4.41986	3.27184	4.82166
51949345	Island25653	chr21:35445261-35445262	-0.123595	0.388352	3.4375	1.58056	0.709324	0.546469	1.54869	4.78493	0.360777	2.7253	3.01463	4.11408
52019915	Open Sea	chr21:38367255-38367256	-0.219604	0.0476278	3.86278	3.38624	0.948553	2.51216	3.11994	1.82311	1.67795	3.12984	3.0374	0.891411
52347681	Open Sea	chr21:48081176-48081177	-0.381076	0.0104448	3.34361	2.62946	2.75151	2.70911	0.947361	2.54482	3.08463	3.57332	2.52989	1.91113
52416565	Open Sea	chr22:18632299-18632300	-0.262014	0.0113124	3.17044	1.10783	3.69306	2.10569	1.32403	2.77136	0.646596	1.38031	1.98063	1.77464
52416567	Open Sea	chr22:18632358-18632359	-0.202928	0.0223824	2.35589	1.82579	6.34916	2.12107	4.20676	3.34733	2.14802	3.61217	3.65513	1.39003
52416573	Open Sea	chr22:18632418-18632419	-0.283913	0.0263611	1.83953	1.18769	3.29495	2.13264	1.53805	3.17944	1.20003	2.5489	3.84939	1.30751
52416575	Open Sea	chr22:18632429-18632430	-0.318708	0.0112441	2.88708	2.22995	6.60693	3.38651	1.929	4.28845	2.65402	4.26821	4.48524	2.01309
52416577	Open Sea	chr22:18632433-18632434	-0.323461	0.00812413	1.51578	1.7574	3.6621	2.91176	3.31194	3.76929	3.73972	3.09935	4.71258	0.767938
52416581	Open Sea	chr22:18632472-18632473	-0.321131	0.00689419	2.57587	2.38716	3.25584	3.03585	2.73822	4.0478	4.83124	4.18983	3.87914	2.57587
52416583	Open Sea	chr22:18632476-18632477	-0.297306	0.0057821	2.3333	1.77203	4.34879	4.81414	2.56132	2.46801	3.41059	4.34879	3.78326	2.40984
52439465	Open Sea	chr22:19279908-19279909	-0.259673	0.0141636	2.03944	1.77963	3.47803	2.77147	3.69133	1.3825	3.15839	4.23551	2.92624	2.77147
52525867	Open Sea	chr22:21505324-21505325	-0.270999	0.036831	4.10203	2.26017	3.66253	2.69871	1.39433	3.02582	2.66224	1.09563	3.164	1.6411
52794067	Open Sea	chr22:31064590-31064591	-0.21178	0.0366307	4.36004	3.55742	4.12526	2.09051	3.53831	1.3187	2.42963	2.76876	3.92179	4.00557
52839295	Open Sea	chr22:32600613-32600614	-0.309002	0.0113552	1.74216	1.28769	1.74216	1.74216	1.26703	1.74216	1.39373	1.0453	1.74216	1.74216
52839297	Open Sea	chr22:32600622-32600623	-0.332215	0.0437	1.73737	1.84417	1.79433	1.92725	1.92725	2.21004	1.88815	1.26268	1.96222	1.73737
53270427	Open Sea	chr22:45705003-45705004	-0.240198	0.0301615	2.14574	1.59555	3.55138	1.91466	3.69256	3.29747	2.55288	1.8529	2.31612	0.683807
53270435	Open Sea	chr22:45705037-45705038	-0.265065	0.0480886	2.83054	1.61081	2.23973	1.51763	3.49391	2.33392	2.44938	0.492718	2.7289	1.73982
53347365	Open Sea	chr22:47487455-47487456	-0.340125	0.0270486	2.7057	2.46056	2.92361	2.39927	2.27309	2.0389	3.196	2.47498	2.49253	1.77959
53347371	Open Sea	chr22:47487498-47487499	-0.350196	0.0304727	2.12524	2.79959	2.06723	1.18328	3.52389	2.48489	2.84455	3.59655	2.3977	3.16634

## Sheet: KS1(n=10)
n=89					normalised value (β-value(sample)-β-value(control_median)/σ) if >3 "GOM", if <3, "LOM"
ID	CpG site	location	mean.meth.diff	adjusted_pvalue	KMT2D_1	KMT2D_2	KMT2D_3	KMT2D_4	KMT2D_5	KMT2D_6	KMT2D_7	KMT2D_8	KMT2D_9	KMT2D_10
1361607	Open Sea	chr1:43406704-43406705	-0.250752	0.017363	3.28189	3.60279	2.93835	2.42572	2.86258	1.78282	2.90648	0.556179	3.52087	2.01393
2785837	Open Sea	chr1:151870743-151870744	-0.358168	0.00496065	2.92723	4.01961	3.40515	3.60997	2.92723	2.68827	4.48046	1.87252	3.71683	3.40515
4525141	Open Sea	chr1:247013024-247013025	-0.2749	0.048215	3.22281	3.36508	3.37731	2.37304	1.41837	2.4185	3.52129	1.47292	3.65503	1.9639
5533583	Open Sea	chr2:47039828-47039829	-0.233566	0.0327384	3.36284	2.22535	2.5579	2.13159	3.14819	1.9773	1.90203	1.25928	2.92562	1.48466
5855301	Open Sea	chr2:66736131-66736132	-0.314798	0.0185965	4.4876	4.56848	2.14556	1.07714	3.3124	4.79326	4.6163	1.51953	4.9323	2.46752
5855305	Open Sea	chr2:66736143-66736144	-0.330558	0.0196222	4.69925	4.92513	1.96772	1.30791	4.84454	5.02052	4.73001	1.87007	4.81943	1.79594
5855307	Open Sea	chr2:66736146-66736147	-0.332694	0.0179894	5.75802	3.5556	0.998056	1.26336	4.34785	4.62828	4.89074	1.92376	5.16625	2.17298
14429249	Open Sea	chr4:151165895-151165896	-0.312467	0.0124949	7.52893	1.85812	5.35702	4.32453	3.31984	4.95487	7.74913	1.33548	9.6483	4.86659
15257297	Open Sea	chr5:4213029-4213030	0.245795	0.0379494	-3.02207	-3.82406	-3.41443	-2.05148	-2.16347	-0.788664	-2.42122	-0.634322	-1.86562	-0.245099
15715207	Open Sea	chr5:33363063-33363064	-0.347306	0.0169641	3.39318	3.40151	3.42605	2.63811	1.54524	2.16287	2.94347	1.49606	3.5651	1.24979
17991423	Open Sea	chr5:177870295-177870296	0.304103	0.0382649	-2.52146	-3.34667	-3.49881	-1.97132	-3.20156	-2.40112	-2.97532	-0.633297	-3.34667	0.453008
20794403	Open Sea	chr6:160876929-160876930	-0.210009	0.0408623	0.816365	2.78412	3.33544	1.51611	2.72899	3.53758	2.34307	2.86376	2.99334	2.72899
21636471	Open Sea	chr7:24517414-24517415	-0.307426	0.0382649	2.8907	2.96842	2.15364	3.1653	1.00087	2.10711	1.72498	2.26463	2.32707	0.419377
21759459	Open Sea	chr7:30635889-30635890	0.20372	0.0273621	-1.40723	-2.47018	-2.83171	-2.33808	-2.96466	-2.46414	-3.19648	-2.3265	-2.23843	-0.73108
23618669	Open Sea	chr7:135667382-135667383	-0.276785	0.0151548	3.31638	0.539986	2.31256	1.32001	2.598	-0.166244	3.9257	1.80268	3.54891	1.30821
23618671	Open Sea	chr7:135667409-135667410	-0.283253	0.019244	2.63399	0.991482	1.5137	1.42632	1.76327	-0.325527	2.43153	1.04544	2.57382	1.63164
25891479	Open Sea	chr8:96705781-96705782	-0.27605	0.0382649	2.22541	2.10981	2.47268	2.51144	1.95382	2.26727	2.42159	1.3228	2.4209	-1.34089
27363325	Open Sea	chr9:35771224-35771225	-0.24291	0.0266284	1.44278	1.52586	1.24618	0.629198	1.13973	1.52204	1.74659	0.626457	1.76784	1.32257
29407835	Open Sea	chr10:5114161-5114162	-0.207011	0.0423513	1.98423	1.18484	1.94425	1.34781	0.4101	0.601314	2.15285	0.880168	2.30198	2.09886
30792151	Open Sea	chr10:80999771-80999772	-0.361441	0.0151548	3.06327	4.74047	4.38677	3.42897	3.24143	2.65454	2.18474	4.48283	4.14413	1.16825
30792161	Open Sea	chr10:80999807-80999808	-0.240825	0.0199284	2.71231	0.783781	2.51643	2.39745	2.84532	2.13399	2.48966	2.52918	2.97376	1.24483
30792163	Open Sea	chr10:80999819-80999820	-0.393673	0.0124949	4.0598	4.44851	3.54153	2.44518	2.16487	3.07037	3.04319	3.34856	2.80919	2.44518
30792165	Open Sea	chr10:80999841-80999842	-0.337765	0.0107314	3.48262	3.38006	3.03054	3.19249	1.936	3.32944	1.82203	3.27238	2.4943	3.32944
30792167	Open Sea	chr10:80999843-80999844	-0.397718	0.0151548	3.95465	3.86464	3.95465	1.95335	2.01203	3.90395	2.63213	3.28343	3.48462	4.43467
30792171	Open Sea	chr10:80999870-80999871	-0.313353	0.0113276	2.98878	2.77675	2.45367	2.16223	2.75725	2.71701	2.11345	2.43535	2.28513	2.82878
32304879	Open Sea	chr11:12204510-12204511	-0.246705	0.0391102	2.31266	2.91987	3.46421	2.1854	2.0164	2.34737	3.58081	1.24858	3.52163	0.740167
32855897	Open Sea	chr11:47282992-47282993	-0.248852	0.0413103	2.61534	2.54231	2.2852	1.48947	2.64461	0.829083	2.60402	1.56063	2.30973	1.56063
34552421	Open Sea	chr12:220883-220884	-0.331573	0.0407848	4.22967	2.08498	0.46708	3.61716	1.54136	3.57267	3.34361	1.55284	3.77557	4.11614
35981297	Open Sea	chr12:83544848-83544849	-0.260115	0.019244	3.89693	1.62477	4.69875	0.26366	3.0966	1.29871	1.4552	1.19724	4.19212	2.89465
36061829	Open Sea	chr12:90693353-90693354	0.230198	0.0331793	-2.13014	-3.53947	-1.97895	-2.9572	-2.42231	-0.519981	-1.80136	-1.45979	-2.47209	-1.16067
37205767	Open Sea	chr13:23490836-23490837	0.303635	0.0278498	-3.29408	-1.96463	-3.77961	-1.63738	-3.98096	-0.00955812	-4.35763	-2.51856	-3.43082	-0.962429
37370685	Open Sea	chr13:30929180-30929181	0.251	0.0172894	-2.24814	-1.70052	-2.2924	-2.5167	-2.15497	-1.25193	-2.9246	-1.40458	-2.69207	-0.495985
40643777	Open Sea	chr15:29968068-29968069	-0.247806	0.0379494	2.32975	2.82348	1.5101	3.63019	0.577835	1.57018	0.715661	3.15905	1.11536	2.85196
40870975	Open Sea	chr15:41310989-41310990	-0.213384	0.0485484	2.16844	2.1048	2.63018	1.49767	2.60599	1.74283	2.50774	0.32737	2.80213	0.26262
41813223	Open Sea	chr15:86039659-86039660	-0.258014	0.0481312	2.59056	2.69812	3.46495	1.36542	1.25579	1.38683	3.08814	1.84617	3.45572	1.38951
41877507	Open Sea	chr15:89673175-89673176	-0.268356	0.0211365	3.81614	3.8402	3.32874	1.89714	1.88811	2.55277	3.01766	2.06111	3.11534	1.71355
42195401	Open Sea	chr16:374570-374571	-0.279577	0.0323717	1.77217	4.51855	3.00065	2.94634	3.93124	4.03624	3.25475	2.97627	3.88355	1.39918
43185825	Shore	chr16:32095330-32095331	0.299274	0.0331793	-3.59982	-5.32019	-6.37929	-4.2218	-2.06353	-2.90957	-2.86475	-5.3769	-2.95663	-2.64855
45677571	Shore	chr17:46657504-46657505	-0.252597	0.0396056	4.73483	5.91929	2.60487	2.49659	2.26916	4.03406	3.19805	0.902531	5.12098	2.36304
45677575	Shore	chr17:46657529-46657530	-0.316929	0.0151548	4.37089	3.49768	1.33798	2.16962	1.87126	2.63219	3.18965	1.07297	3.91165	3.98867
45677579	Shore	chr17:46657535-46657536	-0.316849	0.0113276	5.21242	4.71068	2.91542	1.90372	1.96183	2.49893	5.21242	2.76506	5.02248	4.64663
45677583	Shore	chr17:46657540-46657541	-0.303077	0.0124949	4.78172	4.62527	1.48866	2.0885	2.38556	3.36978	3.92444	1.9439	4.62291	3.74851
45677585	Shore	chr17:46657549-46657550	-0.255655	0.0455882	6.67499	6.33688	1.8695	2.74959	1.56577	2.36117	2.37348	1.2152	6.38471	4.9388
46261549	Open Sea	chr17:72462192-72462193	-0.238396	0.0208969	1.92589	2.97632	1.62999	4.12576	2.36447	4.20227	6.3575	2.06481	5.61459	2.21283
46810853	Island21752	chr18:7011268-7011269	0.200162	0.151471	-3.8405	0.338598	-2.53743	-1.2917	-1.85914	-2.55905	-2.90611	-1.55745	-1.99504	-0.916549
46810855	Island21752	chr18:7011279-7011280	0.204568	0.121278	-3.35426	-0.096534	-2.47495	-1.61812	-1.79006	-2.68612	-2.46319	-1.87479	-2.01197	-0.795431
46810857	Island21752	chr18:7011287-7011288	0.179531	0.299753	-2.8029	-0.108969	-3.14208	-0.433314	-1.76782	-2.88024	-1.89688	-1.86204	-1.08531	-0.356651
46810859	Island21752	chr18:7011320-7011321	0.213466	0.146226	-3.91023	-0.0558604	-2.38636	-0.517978	-1.75029	-3.36345	-3.13304	-1.64602	-1.58255	-1.77636
46810861	Island21752	chr18:7011327-7011328	0.213258	0.146536	-3.72477	-0.399566	-2.18611	-0.74178	-1.76879	-2.85543	-2.94382	-1.80766	-1.56593	-1.87719
46810863	Island21752	chr18:7011338-7011339	0.214892	0.121628	-3.05643	-0.105265	-1.48925	-0.137187	-1.56259	-2.68246	-2.46113	-1.43041	-1.39308	-2.8035
46810865	Island21752	chr18:7011348-7011349	0.224846	0.0850407	-3.89432	-0.343273	-1.99223	-0.454741	-1.79236	-3.30444	-3.71669	-1.82302	-1.98344	-2.39661
46810867	Island21752	chr18:7011360-7011361	0.229609	0.0878342	-3.81327	-0.105194	-2.62984	-1.54503	-1.93557	-3.33718	-3.59695	-1.55225	-1.66557	-2.04377
46810869	Island21752	chr18:7011364-7011365	0.227362	0.0626169	-4.29808	-0.255207	-2.33509	-0.539216	-2.78204	-3.36436	-3.76939	-1.87179	-1.93601	-2.65711
46810873	Island21752	chr18:7011388-7011389	0.270773	0.0185965	-3.11786	-0.766227	-2.44703	-1.30662	-1.97635	-2.78325	-3.11307	-1.73893	-1.50335	-2.05485
46810875	Island21752	chr18:7011412-7011413	0.158723	0.709144	-1.60633	-0.0442029	-1.08967	-0.228569	-0.663486	-1.60633	-1.38983	-1.36277	-0.550868	-1.60633
46810877	Island21752	chr18:7011416-7011417	0.159137	0.0151548	-2.51512	0.176099	-2.14585	-1.26805	-2.32873	-1.59803	-2.27773	-1.77289	-1.41868	-2.43783
46810879	Island21752	chr18:7011447-7011448	0.24415	0.0208969	-2.49622	-0.600864	-2.21344	-1.03222	-1.76739	-2.52653	-3.02113	-1.90404	-2.14661	-2.44974
46810881	Island21752	chr18:7011463-7011464	0.229284	0.0199284	-2.83107	1.57344	-2.62214	0.0203025	-1.90659	-2.47014	-2.96546	-1.88362	-2.56878	-2.05367
46810883	Island21752	chr18:7011473-7011474	0.238445	0.0124949	-2.59535	1.41868	-2.24835	-0.150559	-2.26983	-1.95613	-2.57701	-1.84456	-2.22178	-2.36482
46810885	Island21752	chr18:7011487-7011488	0.249022	0.411743	-3.10305	0.500492	-3.90384	0.117507	-3.01876	-3.4613	-3.69876	-2.61026	-2.70266	-1.80177
46985433	Open Sea	chr18:14357646-14357647	0.212202	0.0382649	-1.93079	-2.01287	-3.42891	-4.15882	-4.42376	-2.17183	-4.15882	-2.72819	-2.09235	-2.54359
48896225	Open Sea	chr19:18000601-18000602	0.238258	0.0151548	-3.93103	-2.65212	-2.00089	-2.23054	-1.13251	-2.53386	-6.52266	-3.2899	-9.1196	-1.96715
48896227	Open Sea	chr19:18000604-18000605	0.285313	0.0350596	-3.54071	-1.95029	-2.09677	-2.97219	-0.0100324	-3.90059	-4.8193	-1.96941	-5.73506	-3.39467
48922145	Open Sea	chr19:18510018-18510019	-0.268176	0.0323169	1.56298	0.402684	1.33167	0.662515	0.479708	0.753826	1.42953	0.469048	1.68583	0.0674184
49574675	Open Sea	chr19:44279027-44279028	-0.304079	0.0431447	3.22693	4.72362	3.60906	3.13622	1.42445	2.5772	4.49685	0.952871	4.32976	2.82781
50249061	Island24842	chr20:3732753-3732754	0.224848	0.0569042	-2.39085	-1.51758	-2.22711	-2.32956	-2.42962	-1.25957	-2.43821	-2.41118	-1.53774	-2.16601
50249063	Island24842	chr20:3732756-3732757	0.232394	0.0396056	-1.88392	-1.95834	-1.73127	-1.76808	-2.08039	-0.798868	-2.11223	-2.09703	-1.74752	-2.06208
50249065	Island24842	chr20:3732759-3732760	0.156396	0.787283	-1.69642	-1.09882	-0.980745	-1.42706	-1.51264	-0.848212	-1.71486	-1.70606	-0.890623	-1.50365
50249067	Island24842	chr20:3732762-3732763	0.226826	0.0617333	-1.74086	-2.00157	-1.86176	-2.06664	-2.35479	-1.15235	-2.21062	-2.34694	-1.54743	-2.34694
50249069	Island24842	chr20:3732775-3732776	0.243924	0.0706835	-2.0131	-2.10273	-1.8055	-2.04743	-2.42928	-0.901794	-2.31474	-2.28802	-1.8055	-2.42928
50249071	Island24842	chr20:3732780-3732781	0.256921	0.0386084	-2.33365	-2.08866	-1.66006	-1.80396	-2.40872	-0.839873	-2.30343	-2.24561	-1.98646	-2.40256
50249073	Island24842	chr20:3732784-3732785	0.253645	0.0606913	-2.33469	-2.16622	-1.99663	-1.98975	-2.58823	-1.12157	-2.07447	-2.41316	-1.96846	-2.57012
50249075	Island24842	chr20:3732786-3732787	0.259067	0.0533772	-2.20994	-1.89097	-1.86303	-1.89313	-2.45173	-1.06107	-2.35103	-2.28653	-1.87329	-2.44584
50249077	Island24842	chr20:3732788-3732789	0.250445	0.0454502	-2.29083	-1.9393	-2.08503	-1.96441	-2.39706	-1.1752	-2.4362	-2.36974	-1.98394	-2.54578
50249079	Island24842	chr20:3732795-3732796	0.265395	0.0185965	-2.05362	-1.83274	-1.67592	-1.93867	-2.29767	-1.18563	-2.19277	-2.17113	-2.26738	-2.44003
50249081	Island24842	chr20:3732817-3732818	0.254135	0.0674518	-1.70964	-1.58216	-1.96015	-1.36742	-2.25408	-1.30726	-2.12704	-2.10505	-1.73182	-2.22867
50249083	Island24842	chr20:3732819-3732820	0.272965	0.389698	-1.68345	-1.81395	-1.8201	-1.42387	-2.21731	-1.2702	-2.09941	-2.06343	-1.7052	-2.46645
50249085	Island24842	chr20:3732822-3732823	0.239555	0.363581	-1.59017	-1.4076	-1.64089	-1.41673	-2.21566	-1.16939	-2.36692	-2.19876	-1.65963	-2.50305
50249087	Island24842	chr20:3732825-3732826	0.266212	0.0514914	-1.62043	-1.78607	-2.05017	-1.29928	-2.18791	-1.42673	-2.07813	-2.17788	-1.68345	-2.31327
50249089	Island24842	chr20:3732827-3732828	0.260918	0.0423513	-1.7094	-1.68533	-2.13006	-1.46121	-2.26271	-1.48825	-2.281	-2.2471	-1.74944	-2.39284
50249091	Island24842	chr20:3732836-3732837	0.254903	0.0638657	-1.53538	-1.67645	-2.12042	-1.38529	-2.24405	-1.50717	-2.40236	-1.93038	-1.61522	-2.25954
50249093	Island24842	chr20:3732839-3732840	0.2594	0.175888	-1.32704	-1.59448	-1.95337	-1.65288	-2.06268	-1.68585	-2.3453	-2.04425	-1.60868	-2.21708
50249095	Island24842	chr20:3732847-3732848	0.257356	0.0606913	-1.58191	-1.73053	-2.16223	-1.56076	-2.45807	-1.59778	-2.35649	-1.85696	-1.7444	-2.20971
50249097	Island24842	chr20:3732853-3732854	0.272703	0.0391102	-1.67593	-1.60216	-2.17429	-1.53576	-2.33771	-1.64958	-2.47737	-2.03302	-1.76814	-2.34754
50249099	Island24842	chr20:3732863-3732864	0.248954	0.0995289	-1.26484	-1.55504	-1.69051	-1.502	-1.90174	-1.43277	-2.19073	-1.48462	-1.62366	-1.94185
50249101	Island24842	chr20:3732878-3732879	0.250487	0.0860438	-1.47236	-1.29296	-2.15073	-1.9313	-2.40301	-1.78709	-2.56983	-1.75428	-2.23002	-2.23002
50249103	Island24842	chr20:3732883-3732884	0.241162	0.134242	-1.16219	-1.42522	-1.7441	-1.81507	-2.14042	-1.35459	-2.30939	-1.52638	-1.69577	-1.9466
53054579	Open Sea	chr22:39759864-39759865	-0.297717	0.0323169	2.28057	2.49926	2.61615	2.60905	2.54228	3.02234	2.47766	2.63533	2.41702	0.8293
53054581	Open Sea	chr22:39759896-39759897	-0.292617	0.0124949	3.41487	2.36234	2.18293	1.4822	2.45871	2.87591	2.47091	2.90872	3.23547	2.70283

## Sheet: KS1 without KMT2D_5(n=9)
n=136					normalised value (β-value(sample)-β-value(control_median)/σ) if >3 "GOM", if <3, "LOM"
ID	CpG site	location	mean.meth.diff	adjusted_pvalue	KMT2D_1	KMT2D_2	KMT2D_3	KMT2D_4	KMT2D_6	KMT2D_7	KMT2D_8	KMT2D_9	KMT2D_10
160537	Open Sea	chr1:2995570-2995571	-0.349222	0.0404451	4.17014	3.15975	3.39995	1.77239	2.08088	1.68242	-0.0387969	5.04652	1.60703
307303	Open Sea	chr1:6879512-6879513	-0.243711	0.0359634	2.35928	4.30362	2.36787	2.31072	1.8653	4.12567	1.21228	3.66223	0.843596
1361607	Open Sea	chr1:43406704-43406705	-0.247622	0.0200555	3.28189	3.60279	2.93835	2.42572	1.78282	2.90648	0.556179	3.52087	2.01393
2785837	Open Sea	chr1:151870743-151870744	-0.363051	0.00623449	2.92723	4.01961	3.40515	3.60997	2.68827	4.48046	1.87252	3.71683	3.40515
2848639	Open Sea	chr1:154703715-154703716	-0.279412	0.0393914	3.5003	2.72538	2.5519	0.172453	1.57976	2.67694	0.726908	2.19116	2.16813
4525141	Open Sea	chr1:247013024-247013025	-0.289163	0.0263672	3.22281	3.36508	3.37731	2.37304	2.4185	3.52129	1.47292	3.65503	1.9639
5855301	Open Sea	chr2:66736131-66736132	-0.315631	0.021	4.4876	4.56848	2.14556	1.07714	4.79326	4.6163	1.51953	4.9323	2.46752
5855305	Open Sea	chr2:66736143-66736144	-0.316914	0.0360271	4.69925	4.92513	1.96772	1.30791	5.02052	4.73001	1.87007	4.81943	1.79594
5855307	Open Sea	chr2:66736146-66736147	-0.322737	0.0259323	5.75802	3.5556	0.998056	1.26336	4.62828	4.89074	1.92376	5.16625	2.17298
6691515	Open Sea	chr2:114481691-114481692	-0.202158	0.0479266	1.98547	1.39559	0.669492	1.42824	1.12505	2.50004	0.81841	1.88391	1.66743
8547289	Island3931	chr2:232348698-232348699	-0.270842	0.0704653	1.85189	2.7515	0.68421	3.28693	2.52844	3.67204	1.71744	5.26826	4.44798
8547291	Island3931	chr2:232348704-232348705	-0.288603	0.022536	2.68892	3.68428	0.603141	4.90201	3.86694	4.76463	1.60907	6.71428	5.79501
8547293	Island3931	chr2:232348714-232348715	-0.287645	0.0731526	1.75928	1.81185	0.166806	4.19881	4.02774	4.32525	2.26751	6.23503	7.09575
8547295	Island3931	chr2:232348740-232348741	-0.278164	0.0350044	2.84533	2.67831	2.1749	2.82415	3.15045	4.67268	1.46336	5.1598	5.36589
8547297	Island3931	chr2:232348742-232348743	-0.276096	0.0516857	3.48057	3.54319	2.47294	3.14753	3.47368	4.58416	1.13082	4.78075	2.28555
8547299	Island3931	chr2:232348762-232348763	-0.251803	0.10584	2.20847	2.49873	2.00753	2.34298	2.85349	4.09514	0.0605752	5.76942	5.12811
8547301	Island3931	chr2:232348788-232348789	-0.264996	0.151596	1.05972	3.07178	1.71158	3.26425	1.13948	4.72721	-0.188014	5.20423	4.64908
8547303	Island3931	chr2:232348794-232348795	-0.29709	0.0888197	1.78198	3.54429	1.07333	3.97223	3.08228	4.36143	-0.466468	4.65571	6.09516
8547305	Island3931	chr2:232348804-232348805	-0.286985	0.122556	1.97107	3.35394	1.6399	2.8918	4.40804	4.19813	-1.10201	5.51005	3.67336
8547307	Island3931	chr2:232348827-232348828	-0.274701	0.193167	1.06219	3.7766	1.61275	3.13432	3.93214	4.91286	-1.0854	5.37604	5.24998
8547309	Island3931	chr2:232348836-232348837	-0.203113	0.328937	0.397703	2.78392	0.927974	3.53633	1.98852	4.06881	-1.07074	4.82094	3.07697
8547311	Island3931	chr2:232348846-232348847	-0.208622	0.447167	1.85167	3.4441	0.85596	3.80621	3.4597	4.19348	-1.85167	6.68658	5.45214
8547313	Island3931	chr2:232348848-232348849	-0.283275	0.173382	1.90116	4.36094	0.889209	4.34648	5.27866	3.89564	-1.1043	6.11762	6.75523
8547315	Island3931	chr2:232348857-232348858	-0.29732	0.139513	1.54811	4.8655	1.88466	4.74659	3.96448	3.44025	-0.836492	6.12307	6.02395
8547317	Island3931	chr2:232348865-232348866	-0.260739	0.285321	1.52156	2.94295	1.09599	4.13482	3.0309	4.67263	-1.40179	5.60544	5.18567
12106801	Shore	chr3:196694912-196694913	-0.216944	0.0297726	1.85602	1.08841	0.740534	1.61543	1.46737	2.39736	1.45002	1.99258	0.667198
14429249	Open Sea	chr4:151165895-151165896	-0.324649	0.0098429	7.52893	1.85812	5.35702	4.32453	4.95487	7.74913	1.33548	9.6483	4.86659
15188897	Open Sea	chr5:1849992-1849993	-0.368902	0.0164117	1.85826	3.09793	2.77492	3.1314	3.02492	2.89714	2.9512	2.9512	1.34365
15715207	Open Sea	chr5:33363063-33363064	-0.362102	0.0098429	3.39318	3.40151	3.42605	2.63811	2.16287	2.94347	1.49606	3.5651	1.24979
19152401	Open Sea	chr6:45294926-45294927	-0.295309	0.0143276	2.76076	0.894948	1.7916	1.76267	0.704998	3.15465	0.0754297	3.17996	1.94674
21636471	Open Sea	chr7:24517414-24517415	-0.325994	0.0164117	2.8907	2.96842	2.15364	3.1653	2.10711	1.72498	2.26463	2.32707	0.419377
23618669	Open Sea	chr7:135667382-135667383	-0.268144	0.0179309	3.31638	0.539986	2.31256	1.32001	-0.166244	3.9257	1.80268	3.54891	1.30821
23618671	Open Sea	chr7:135667409-135667410	-0.279343	0.0195204	2.63399	0.991482	1.5137	1.42632	-0.325527	2.43153	1.04544	2.57382	1.63164
25891479	Open Sea	chr8:96705781-96705782	-0.273902	0.0393914	2.22541	2.10981	2.47268	2.51144	2.26727	2.42159	1.3228	2.4209	-1.34089
26360991	Open Sea	chr8:128098601-128098602	0.326715	0.0251981	-2.56056	-3.09519	-2.55448	-1.56796	-1.17597	-2.61113	-1.46905	-2.69433	-1.66129
27363325	Open Sea	chr9:35771224-35771225	-0.245965	0.0154143	1.44278	1.52586	1.24618	0.629198	1.52204	1.74659	0.626457	1.76784	1.32257
28787137	Open Sea	chr9:130601041-130601042	-0.295077	0.0479266	2.99923	3.98469	5.04226	3.84877	3.70313	2.55129	0.615049	5.16724	0.759545
29208001	Open Sea	chr9:140045557-140045558	0.262029	0.0491811	-1.48495	-2.11828	-2.04967	-1.93716	-1.73793	-1.8309	-0.798684	-2.19218	-0.813065
29407835	Open Sea	chr10:5114161-5114162	-0.22343	0.0098429	1.98423	1.18484	1.94425	1.34781	0.601314	2.15285	0.880168	2.30198	2.09886
30792151	Open Sea	chr10:80999771-80999772	-0.362738	0.0176516	3.06327	4.74047	4.38677	3.42897	2.65454	2.18474	4.48283	4.14413	1.16825
30792161	Open Sea	chr10:80999807-80999808	-0.233024	0.0393914	2.71231	0.783781	2.51643	2.39745	2.13399	2.48966	2.52918	2.97376	1.24483
30792163	Open Sea	chr10:80999819-80999820	-0.407576	0.00658829	4.0598	4.44851	3.54153	2.44518	3.07037	3.04319	3.34856	2.80919	2.44518
30792165	Open Sea	chr10:80999841-80999842	-0.351276	0.00465271	3.48262	3.38006	3.03054	3.19249	3.32944	1.82203	3.27238	2.4943	3.32944
30792167	Open Sea	chr10:80999843-80999844	-0.416316	0.0098429	3.95465	3.86464	3.95465	1.95335	3.90395	2.63213	3.28343	3.48462	4.43467
30792169	Open Sea	chr10:80999857-80999858	-0.278161	0.0251981	2.14242	2.00939	1.7945	1.78535	1.67453	1.52566	2.14242	2.14242	1.76551
30792171	Open Sea	chr10:80999870-80999871	-0.310315	0.0116824	2.98878	2.77675	2.45367	2.16223	2.71701	2.11345	2.43535	2.28513	2.82878
30792173	Open Sea	chr10:80999872-80999873	-0.279255	0.0393914	2.96327	2.88608	2.77876	1.92954	2.18384	2.00606	2.32384	2.52234	2.43274
31751975	Open Sea	chr10:129775898-129775899	-0.257503	0.0251981	2.03815	2.08621	2.67949	2.47274	2.18083	2.74854	1.30633	2.30248	1.74636
32304879	Open Sea	chr11:12204510-12204511	-0.251727	0.0260804	2.31266	2.91987	3.46421	2.1854	2.34737	3.58081	1.24858	3.52163	0.740167
34552421	Open Sea	chr12:220883-220884	-0.349091	0.0293109	4.22967	2.08498	0.46708	3.61716	3.57267	3.34361	1.55284	3.77557	4.11614
35048241	Open Sea	chr12:25176868-25176869	0.271382	0.0251981	-2.72551	-2.07768	-2.6561	-0.150994	-0.340297	-2.72551	-2.72551	-2.72551	1.27858
35981297	Open Sea	chr12:83544848-83544849	-0.252296	0.023836	3.89693	1.62477	4.69875	0.26366	1.29871	1.4552	1.19724	4.19212	2.89465
37370685	Open Sea	chr13:30929180-30929181	0.248357	0.0191301	-2.24814	-1.70052	-2.2924	-2.5167	-1.25193	-2.9246	-1.40458	-2.69207	-0.495985
40643777	Open Sea	chr15:29968068-29968069	-0.26715	0.0282447	2.32975	2.82348	1.5101	3.63019	1.57018	0.715661	3.15905	1.11536	2.85196
41029827	Open Sea	chr15:49149387-49149388	-0.302124	0.0353859	3.90594	0.150929	3.22643	1.13007	1.99545	3.76528	0.427873	3.63441	2.95622
41813223	Open Sea	chr15:86039659-86039660	-0.270724	0.0253105	2.59056	2.69812	3.46495	1.36542	1.38683	3.08814	1.84617	3.45572	1.38951
41877507	Open Sea	chr15:89673175-89673176	-0.277855	0.0143276	3.81614	3.8402	3.32874	1.89714	2.55277	3.01766	2.06111	3.11534	1.71355
43185825	Shore	chr16:32095330-32095331	0.315494	0.0174352	-3.59982	-5.32019	-6.37929	-4.2218	-2.90957	-2.86475	-5.3769	-2.95663	-2.64855
45677563	Shore	chr17:46657348-46657349	-0.278486	0.0253105	2.888	3.01495	3.49138	1.29875	2.75278	3.18421	1.67929	2.87023	1.2162
45677569	Shore	chr17:46657437-46657438	-0.247389	0.0251981	4.43153	3.02816	1.43742	1.87984	2.86266	3.5732	0.258347	4.33399	2.43202
45677571	Shore	chr17:46657504-46657505	-0.261791	0.0325484	4.73483	5.91929	2.60487	2.49659	4.03406	3.19805	0.902531	5.12098	2.36304
45677573	Shore	chr17:46657514-46657515	-0.283661	0.0441224	5.06262	3.44817	2.60777	2.73051	3.42041	1.95315	1.37814	6.20821	4.21648
45677575	Shore	chr17:46657529-46657530	-0.328462	0.0098429	4.37089	3.49768	1.33798	2.16962	2.63219	3.18965	1.07297	3.91165	3.98867
45677579	Shore	chr17:46657535-46657536	-0.333649	0.00658829	5.21242	4.71068	2.91542	1.90372	2.49893	5.21242	2.76506	5.02248	4.64663
45677583	Shore	chr17:46657540-46657541	-0.312942	0.00885704	4.78172	4.62527	1.48866	2.0885	3.36978	3.92444	1.9439	4.62291	3.74851
45677585	Shore	chr17:46657549-46657550	-0.272852	0.0251981	6.67499	6.33688	1.8695	2.74959	2.36117	2.37348	1.2152	6.38471	4.9388
45679359	Island21001	chr17:46685245-46685246	0.203876	0.125026	-2.09497	-1.51259	-1.89073	-1.4335	-1.1122	-2.06262	-1.11987	-2.22439	-1.55708
45679361	Island21001	chr17:46685255-46685256	0.165491	0.248586	-1.92991	-1.11116	-1.35382	-0.346394	-1.30399	-1.92991	-1.07217	-1.92991	-1.26823
45679363	Island21001	chr17:46685261-46685262	0.165523	0.388072	-1.63835	-1.17254	-1.4121	-0.865793	-0.623132	-1.50413	-1.15843	-1.63835	-1.63835
45679365	Island21001	chr17:46685263-46685264	0.191471	0.627318	-1.8076	-1.14541	-1.53812	-1.13632	-0.642547	-1.80261	-1.25054	-1.90902	-1.90902
45679367	Island21001	chr17:46685292-46685293	0.294848	0.108146	-1.80521	-1.39798	-1.25077	-0.425415	-0.914277	-2.03231	-1.09829	-2.09199	-1.16222
45679369	Island21001	chr17:46685295-46685296	0.239884	0.0555576	-1.69616	-0.952836	-0.803756	-0.372295	-0.730801	-1.75557	-0.973563	-1.5901	-0.822151
45679371	Island21001	chr17:46685327-46685328	0.263948	0.0329931	-1.89554	-1.26733	-1.09592	-0.998399	-1.35471	-2.03865	-0.826572	-2.46812	-1.23624
45679373	Island21001	chr17:46685339-46685340	0.294938	0.00779575	-2.67348	-2.01227	-0.920418	-0.475612	-1.72225	-2.08052	-0.877483	-2.59625	-1.8461
45679375	Island21001	chr17:46685345-46685346	0.27833	0.0195204	-2.31802	-1.71858	-0.932371	-0.505938	-1.4319	-2.26123	-1.04644	-2.22537	-1.46619
45679377	Island21001	chr17:46685347-46685348	0.14528	0.147875	-2.00423	-1.21284	0.0388496	-0.387652	-0.761966	-1.81691	-0.174823	-1.89616	-1.53595
45679379	Island21001	chr17:46685353-46685354	0.191569	0.847348	-1.24985	-0.793808	-0.271158	-0.159855	-0.849202	-0.995673	-0.469691	-1.22782	-1.18575
45679381	Island21001	chr17:46685358-46685359	0.283044	0.0143276	-2.00982	-1.39761	-1.21428	-0.738133	-1.5206	-1.88774	-0.763309	-2.27057	-1.40829
45679383	Island21001	chr17:46685361-46685362	0.248584	0.0223151	-2.04848	-1.18926	-0.91817	-0.504765	-1.36293	-1.95491	-0.77852	-2.03543	-2.1282
45679385	Island21001	chr17:46685364-46685365	0.253525	0.0164117	-2.0662	-1.23928	-0.0153709	-0.230563	-1.11823	-2.17327	-0.352831	-2.10127	-1.14513
45679387	Island21001	chr17:46685367-46685368	0.176464	0.0699783	-1.76247	-0.63552	-0.369537	-0.455297	-1.19494	-1.76483	-0.699609	-2.00592	-1.55805
45679389	Island21001	chr17:46685369-46685370	0.275915	0.506693	-2.38391	-1.33475	-1.0507	-0.632238	-1.43804	-2.00122	-0.702546	-2.21686	-1.72086
45679391	Island21001	chr17:46685379-46685380	0.22529	0.0705521	-2.00506	-0.851464	-0.170418	-0.398464	-0.889637	-1.82059	-0.408075	-1.88231	-1.13612
45679393	Island21001	chr17:46685421-46685422	0.239391	0.0630198	-2.57091	-1.50475	0.0020803	-0.455397	-2.1018	-2.25106	-0.00154916	-2.76877	-1.88127
45679395	Island21001	chr17:46685436-46685437	0.207433	0.197069	-1.76398	-0.477502	0.292504	-0.766782	-1.49639	-2.01984	0.0203734	-2.18107	-1.20589
45679397	Island21001	chr17:46685442-46685443	0.183631	0.0711088	-1.49445	-1.20413	-0.728514	-0.377778	-1.54182	-1.56151	0.0306743	-1.40681	-0.44171
45679399	Island21001	chr17:46685448-46685449	0.163071	0.399852	-1.40701	-1.20124	0.401277	-0.422033	-1.98855	-1.92995	-0.16891	-1.951	-1.73714
46261549	Open Sea	chr17:72462192-72462193	-0.24718	0.0179309	1.92589	2.97632	1.62999	4.12576	4.20227	6.3575	2.06481	5.61459	2.21283
46261551	Open Sea	chr17:72462234-72462235	-0.212691	0.0425388	3.21231	2.49591	2.43143	2.24285	1.59349	2.08277	1.13265	3.47199	0.991353
46810853	Island21752	chr18:7011268-7011269	0.200815	0.140849	-3.8405	0.338598	-2.53743	-1.2917	-2.55905	-2.90611	-1.55745	-1.99504	-0.916549
46810855	Island21752	chr18:7011279-7011280	0.206164	0.117575	-3.35426	-0.096534	-2.47495	-1.61812	-2.68612	-2.46319	-1.87479	-2.01197	-0.795431
46810857	Island21752	chr18:7011287-7011288	0.17791	0.295334	-2.8029	-0.108969	-3.14208	-0.433314	-2.88024	-1.89688	-1.86204	-1.08531	-0.356651
46810859	Island21752	chr18:7011320-7011321	0.216567	0.125026	-3.91023	-0.0558604	-2.38636	-0.517978	-3.36345	-3.13304	-1.64602	-1.58255	-1.77636
46810861	Island21752	chr18:7011327-7011328	0.216034	0.127359	-3.72477	-0.399566	-2.18611	-0.74178	-2.85543	-2.94382	-1.80766	-1.56593	-1.87719
46810863	Island21752	chr18:7011338-7011339	0.216799	0.113402	-3.05643	-0.105265	-1.48925	-0.137187	-2.68246	-2.46113	-1.43041	-1.39308	-2.8035
46810865	Island21752	chr18:7011348-7011349	0.229071	0.0637344	-3.89432	-0.343273	-1.99223	-0.454741	-3.30444	-3.71669	-1.82302	-1.98344	-2.39661
46810867	Island21752	chr18:7011360-7011361	0.232976	0.0731526	-3.81327	-0.105194	-2.62984	-1.54503	-3.33718	-3.59695	-1.55225	-1.66557	-2.04377
46810869	Island21752	chr18:7011364-7011365	0.223077	0.0637508	-4.29808	-0.255207	-2.33509	-0.539216	-3.36436	-3.76939	-1.87179	-1.93601	-2.65711
46810873	Island21752	chr18:7011388-7011389	0.272264	0.0177267	-3.11786	-0.766227	-2.44703	-1.30662	-2.78325	-3.11307	-1.73893	-1.50335	-2.05485
46810875	Island21752	chr18:7011412-7011413	0.164734	0.627296	-1.60633	-0.0442029	-1.08967	-0.228569	-1.60633	-1.38983	-1.36277	-0.550868	-1.60633
46810877	Island21752	chr18:7011416-7011417	0.154208	0.0195204	-2.51512	0.176099	-2.14585	-1.26805	-1.59803	-2.27773	-1.77289	-1.41868	-2.43783
46810879	Island21752	chr18:7011447-7011448	0.247623	0.0195204	-2.49622	-0.600864	-2.21344	-1.03222	-2.52653	-3.02113	-1.90404	-2.14661	-2.44974
46810881	Island21752	chr18:7011463-7011464	0.227514	0.0195204	-2.83107	1.57344	-2.62214	0.0203025	-2.47014	-2.96546	-1.88362	-2.56878	-2.05367
46810883	Island21752	chr18:7011473-7011474	0.229803	0.0152701	-2.59535	1.41868	-2.24835	-0.150559	-1.95613	-2.57701	-1.84456	-2.22178	-2.36482
46810885	Island21752	chr18:7011487-7011488	0.240426	0.383645	-3.10305	0.500492	-3.90384	0.117507	-3.4613	-3.69876	-2.61026	-2.70266	-1.80177
48704113	Open Sea	chr19:13182821-13182822	-0.255747	0.0479266	4.80458	2.31726	2.16023	2.05736	2.52697	4.7652	-0.300031	5.68923	1.25646
48896225	Open Sea	chr19:18000601-18000602	0.255767	0.0098429	-3.93103	-2.65212	-2.00089	-2.23054	-2.53386	-6.52266	-3.2899	-9.1196	-1.96715
48896227	Open Sea	chr19:18000604-18000605	0.31717	0.0098429	-3.54071	-1.95029	-2.09677	-2.97219	-3.90059	-4.8193	-1.96941	-5.73506	-3.39467
48922145	Open Sea	chr19:18510018-18510019	-0.277368	0.0191301	1.56298	0.402684	1.33167	0.662515	0.753826	1.42953	0.469048	1.68583	0.0674184
49574675	Open Sea	chr19:44279027-44279028	-0.323077	0.0223151	3.22693	4.72362	3.60906	3.13622	2.5772	4.49685	0.952871	4.32976	2.82781
50249061	Island24842	chr20:3732753-3732754	0.219942	0.0836838	-2.39085	-1.51758	-2.22711	-2.32956	-1.25957	-2.43821	-2.41118	-1.53774	-2.16601
50249063	Island24842	chr20:3732756-3732757	0.228689	0.0613344	-1.88392	-1.95834	-1.73127	-1.76808	-0.798868	-2.11223	-2.09703	-1.74752	-2.06208
50249065	Island24842	chr20:3732759-3732760	0.154216	0.796515	-1.69642	-1.09882	-0.980745	-1.42706	-0.848212	-1.71486	-1.70606	-0.890623	-1.50365
50249067	Island24842	chr20:3732762-3732763	0.221467	0.0927679	-1.74086	-2.00157	-1.86176	-2.06664	-1.15235	-2.21062	-2.34694	-1.54743	-2.34694
50249069	Island24842	chr20:3732775-3732776	0.237822	0.100843	-2.0131	-2.10273	-1.8055	-2.04743	-0.901794	-2.31474	-2.28802	-1.8055	-2.42928
50249071	Island24842	chr20:3732780-3732781	0.251237	0.0629249	-2.33365	-2.08866	-1.66006	-1.80396	-0.839873	-2.30343	-2.24561	-1.98646	-2.40256
50249073	Island24842	chr20:3732784-3732785	0.246914	0.0913356	-2.33469	-2.16622	-1.99663	-1.98975	-1.12157	-2.07447	-2.41316	-1.96846	-2.57012
50249075	Island24842	chr20:3732786-3732787	0.252863	0.0836838	-2.20994	-1.89097	-1.86303	-1.89313	-1.06107	-2.35103	-2.28653	-1.87329	-2.44584
50249077	Island24842	chr20:3732788-3732789	0.246447	0.067521	-2.29083	-1.9393	-2.08503	-1.96441	-1.1752	-2.4362	-2.36974	-1.98394	-2.54578
50249079	Island24842	chr20:3732795-3732796	0.26101	0.034497	-2.05362	-1.83274	-1.67592	-1.93867	-1.18563	-2.19277	-2.17113	-2.26738	-2.44003
50249081	Island24842	chr20:3732817-3732818	0.247507	0.0980198	-1.70964	-1.58216	-1.96015	-1.36742	-1.30726	-2.12704	-2.10505	-1.73182	-2.22867
50249083	Island24842	chr20:3732819-3732820	0.26711	0.398221	-1.68345	-1.81395	-1.8201	-1.42387	-1.2702	-2.09941	-2.06343	-1.7052	-2.46645
50249085	Island24842	chr20:3732822-3732823	0.233845	0.366728	-1.59017	-1.4076	-1.64089	-1.41673	-1.16939	-2.36692	-2.19876	-1.65963	-2.50305
50249087	Island24842	chr20:3732825-3732826	0.261073	0.0768911	-1.62043	-1.78607	-2.05017	-1.29928	-1.42673	-2.07813	-2.17788	-1.68345	-2.31327
50249089	Island24842	chr20:3732827-3732828	0.255924	0.0661155	-1.7094	-1.68533	-2.13006	-1.46121	-1.48825	-2.281	-2.2471	-1.74944	-2.39284
50249091	Island24842	chr20:3732836-3732837	0.24902	0.0917012	-1.53538	-1.67645	-2.12042	-1.38529	-1.50717	-2.40236	-1.93038	-1.61522	-2.25954
50249093	Island24842	chr20:3732839-3732840	0.255973	0.176485	-1.32704	-1.59448	-1.95337	-1.65288	-1.68585	-2.3453	-2.04425	-1.60868	-2.21708
50249095	Island24842	chr20:3732847-3732848	0.249038	0.0928054	-1.58191	-1.73053	-2.16223	-1.56076	-1.59778	-2.35649	-1.85696	-1.7444	-2.20971
50249097	Island24842	chr20:3732853-3732854	0.266384	0.0630198	-1.67593	-1.60216	-2.17429	-1.53576	-1.64958	-2.47737	-2.03302	-1.76814	-2.34754
50249099	Island24842	chr20:3732863-3732864	0.244822	0.127267	-1.26484	-1.55504	-1.69051	-1.502	-1.43277	-2.19073	-1.48462	-1.62366	-1.94185
50249101	Island24842	chr20:3732878-3732879	0.243466	0.117575	-1.47236	-1.29296	-2.15073	-1.9313	-1.78709	-2.56983	-1.75428	-2.23002	-2.23002
50249103	Island24842	chr20:3732883-3732884	0.233693	0.182351	-1.16219	-1.42522	-1.7441	-1.81507	-1.35459	-2.30939	-1.52638	-1.69577	-1.9466
51841487	Open Sea	chr21:30452862-30452863	-0.287853	0.0492808	2.23021	4.81736	2.62195	1.41922	2.76628	3.71502	0.382098	4.47601	2.36537
52595973	Open Sea	chr22:23799793-23799794	0.211299	0.0368946	-3.02861	-2.20874	-2.59851	-2.59851	-2.33866	-3.65753	-1.83264	-4.51742	-2.96536
53054579	Open Sea	chr22:39759864-39759865	-0.295377	0.0411839	2.28057	2.49926	2.61615	2.60905	3.02234	2.47766	2.63533	2.41702	0.8293
53054581	Open Sea	chr22:39759896-39759897	-0.294729	0.0098429	3.41487	2.36234	2.18293	1.4822	2.87591	2.47091	2.90872	3.23547	2.70283

## Sheet: BOTH without KMT2D5 (n=19)
n=677					normalised value (β-value(sample)-β-value(control_median)/σ) if >3 "GOM", if <3, "LOM"
ID	CpG site	location	mean.meth.diff	adjusted_pvalue	KMT2D_1	KMT2D_2	KMT2D_3	KMT2D_4	KMT2D_6	KMT2D_7	KMT2D_8	KMT2D_9	KMT2D_10	KMT2B_1	KMT2B_2	KMT2B_3	KMT2B_4	KMT2B_5	KMT2B_6	KMT2B_7	KMT2B_8	KMT2B_9	KMT2B_10
109375	Island168	chr1:2082315-2082316	-0.141492	0.0676031	1.01585	5.70545	5.42141	0.521167	2.53295	1.25666	-0.29709	1.76718	-0.161446	-0.831822	0.433243	2.80644	0.892003	0.379206	0.235623	0.186219	0.522789	-0.161446	2.10752
109377	Island168	chr1:2082319-2082320	-0.137582	0.0948696	0.754694	5.29293	5.75435	0.737183	2.52421	1.10491	-0.280732	1.75865	0.423933	-0.506089	0.521216	2.59334	0.754694	0.23745	0.0482208	-0.232283	0.469332	-0.295959	1.92209
109379	Island168	chr1:2082321-2082322	-0.139637	0.103693	0.823245	6.00371	5.47186	0.534286	2.42857	0.892665	-0.245715	1.83924	-0.142245	-0.927021	0.534286	3.51102	0.744763	0.223284	-0.13788	-0.211948	0.353878	-0.314877	2.00762
109381	Island168	chr1:2082330-2082331	-0.147866	0.0787799	0.991967	6.18416	5.41517	0.449368	2.47504	1.17376	-0.180651	2.51755	-0.0486534	-0.625905	0.726858	3.80125	0.879477	0.0595814	0.498523	-0.195796	0.840376	-0.332649	2.21282
109383	Island168	chr1:2082349-2082350	-0.139887	0.0967561	1.24009	6.81243	6.32942	0.183891	2.95641	1.83608	-0.375271	3.05773	-0.366584	-0.964722	0.208265	3.10664	0.610432	0.0301911	0.31939	0.259334	0.669081	-0.45839	2.70012
109385	Island168	chr1:2082375-2082376	-0.15975	0.0455634	0.98143	6.07985	5.1915	1.04155	2.00548	1.52742	-0.0800226	3.4022	-0.466284	-0.962323	0.287978	2.97862	0.497639	-0.185481	0.636112	0.543023	0.912182	-0.652634	1.85488
109387	Island168	chr1:2082414-2082415	-0.139007	0.0187611	0.783241	3.86534	3.51157	0.986468	1.02941	1.19567	0.107048	3.31952	-0.558059	-0.505801	0.183581	3.14224	0.318181	-0.0995097	0.950903	0.335359	0.752371	-0.540215	1.85296
109389	Island168	chr1:2082426-2082427	-0.154502	0.061486	0.664506	5.76781	5.04954	1.14844	1.59029	1.14051	0.136578	3.29512	-0.496935	-0.326968	-0.28973	3.89073	0.470933	0.0595889	0.990754	0.243694	0.954867	-1.06196	2.37251
109391	Island168	chr1:2082442-2082443	-0.172212	0.0386431	0.873427	6.28166	4.76142	0.72962	1.28192	0.761484	0.107499	3.35143	-0.733393	-0.434255	0.174808	4.89029	0.724747	-0.135653	1.03866	0.712179	0.748289	-0.946779	2.90569
109393	Island168	chr1:2082450-2082451	-0.142604	0.0530219	0.693653	4.8919	4.17942	0.547304	1.25396	0.693653	-0.132172	2.99342	-0.663399	-0.574703	0.234948	3.62063	1.02294	0.166798	1.00029	0.38423	0.435391	-0.920365	2.19617
109395	Island168	chr1:2082456-2082457	-0.150427	0.0601304	0.932917	5.58358	4.68628	0.724676	1.09285	0.777431	-0.229406	3.13193	-0.764992	-0.327782	0.299866	4.54797	0.803345	-0.0553425	1.09021	0.699688	0.499308	-0.918782	2.06991
109399	Island168	chr1:2082478-2082479	-0.167111	0.0500368	1.63187	4.84878	4.97879	1.33424	1.2726	0.570518	-0.363216	2.45246	-0.860087	-0.234015	0.018032	4.24988	1.64072	-0.0818918	0.778477	0.616379	0.229836	-0.907054	1.21376
109405	Island168	chr1:2082522-2082523	-0.170617	0.0603607	1.55742	5.26124	4.97628	1.3691	1.40022	0.414979	-0.237006	2.80537	-0.824712	0.8825	0.251773	4.54634	2.87121	0.192898	1.20752	0.595684	0.0174269	-1.03665	1.5209
109407	Island168	chr1:2082528-2082529	-0.17517	0.12954	1.34739	5.71335	5.87868	1.27769	1.37568	0.343232	-0.574025	2.6962	-1.26467	0.666106	-0.314136	4.60848	2.57522	0.401164	1.38749	0.248547	-0.115397	-1.2578	1.44394
452907	Open Sea	chr1:11072021-11072022	-0.213519	0.0345448	-0.161504	1.6087	-0.36887	1.39097	2.06183	0.619702	0.835531	3.25747	1.63646	1.22094	1.00415	0.751223	-0.224342	1.46064	0.992383	1.73482	1.98055	2.18446	1.25707
1017329	Open Sea	chr1:29508990-29508991	-0.209109	0.0115822	2.85227	0.938108	-1.9879	0.804323	3.14147	0.0332338	0.536753	4.61834	2.55648	3.11096	3.54692	3.99845	3.76718	2.60775	3.48464	1.74082	3.20716	4.30432	3.28891
1188543	Open Sea	chr1:36521326-36521327	-0.206107	0.0216562	2.71598	4.95235	4.70244	1.16383	4.23338	0.377082	0.550914	3.02533	-0.439929	-0.439929	0.163949	2.66471	1.46643	0.546119	0.871089	0.228535	1.52437	0.280963	1.3575
2068891	Open Sea	chr1:86969330-86969331	-0.214012	0.0439118	0.694762	1.62997	-0.980276	-0.0876978	1.02133	2.1595	0.97756	2.69315	-0.67359	1.99778	2.42735	2.39454	2.5381	1.00978	2.27969	1.88213	2.63181	1.08066	1.50445
2687985	Open Sea	chr1:147800991-147800992	-0.242347	0.0192774	0.733473	0.905333	-0.398347	0.93902	0.5432	0.3104	-0.561771	1.85245	-0.631886	3.36345	2.20901	2.30392	3.53415	2.89707	2.53493	3.12866	3.44737	3.05956	3.47319
2687999	Open Sea	chr1:147801103-147801104	-0.207284	0.0334433	-0.109539	0.314838	-0.134658	1.37247	0.535179	0.240745	-0.122696	0.810605	-1.01382	3.13079	2.59987	2.85677	3.54183	3.63863	3.45375	3.30469	3.66594	3.13079	3.13079
2688003	Open Sea	chr1:147801134-147801135	-0.205184	0.0338546	-0.962466	-0.186847	0.126088	1.11971	0.646445	0.17183	-1.33796	0.491708	-1.70074	2.76949	2.81352	2.89783	2.68067	3.11243	3.20142	3.36336	3.44509	3.34138	2.57322
2688005	Open Sea	chr1:147801136-147801137	-0.260788	0.00754776	-0.303907	1.66425	1.3663	1.87707	1.3886	0.514441	-0.651229	1.53269	-1.11878	4.36565	2.90992	4.34153	3.65412	3.23966	4.05766	4.40073	4.04784	3.63488	3.43821
2688007	Open Sea	chr1:147801146-147801147	-0.274782	0.0156445	-0.198365	1.26405	1.42161	2.1302	1.39343	-0.123638	-0.61093	0.95978	-0.685835	5.04885	3.55954	4.31309	4.09292	3.8204	4.79241	5.09503	5.10873	4.90042	3.89291
2688015	Open Sea	chr1:147801178-147801179	-0.298608	0.0220042	-0.488174	1.14382	2.02215	1.8461	0.907176	0.483738	-0.418368	1.89537	-1.0724	2.88936	2.76764	3.41558	3.17981	3.74135	4.64866	5.26276	4.70544	4.48684	4.12327
2688019	Open Sea	chr1:147801218-147801219	-0.310244	0.0359948	-0.00382284	0.584194	-1.1713	1.10607	1.51326	1.60545	-0.48831	2.05488	-0.929832	4.36353	3.47416	3.93528	4.89726	3.75275	5.30962	3.582	5.11619	4.35771	4.06413
2688023	Open Sea	chr1:147801259-147801260	-0.283615	0.0122594	-0.0280016	0.986688	0.367271	0.807948	1.48716	1.90715	-0.385022	3.18518	-0.395222	3.4946	4.67702	4.23321	4.64386	4.91428	5.3511	5.07607	6.08023	4.17974	3.84822
2688027	Open Sea	chr1:147801300-147801301	-0.290016	0.0497246	-0.3441	0.417334	0.0513945	0.173776	0.685871	0.7462	-0.257846	1.78688	-0.933252	3.03974	3.51019	3.98888	4.26413	4.09898	3.69915	4.26413	4.28248	3.35146	3.76868
2785837	Open Sea	chr1:151870743-151870744	-0.248991	0.000680619	2.92723	4.01961	3.40515	3.60997	2.68827	4.48046	1.87252	3.71683	3.40515	-0.322593	-1.41745	4.12202	0.146633	1.9714	1.71072	2.99551	1.51521	1.25453	2.85371
2819445	Open Sea	chr1:153747506-153747507	-0.206215	0.0154504	1.90024	5.45393	3.84439	2.24573	2.88737	1.98153	0.367484	4.49147	-0.863744	-0.449147	2.44989	3.99242	0.898294	0.887849	2.24573	1.81108	1.20924	0.612473	0.396306
3137091	Open Sea	chr1:169429891-169429892	-0.217102	0.00262242	3.14331	1.07491	2.99461	0.877368	0.099689	1.52883	0.681931	0.947569	-1.23711	2.1557	2.2495	4.62326	3.07885	3.79305	3.17849	3.16505	3.7275	3.59954	4.02609
3137097	Open Sea	chr1:169429972-169429973	-0.217753	0.00714929	1.36584	2.25211	3.22099	-0.428455	0.687145	2.25947	0.0145171	0.900651	-0.773038	2.24467	1.88965	5.48787	3.35606	4.08245	4.17195	2.77721	4.39193	3.54235	3.66477
3137187	Open Sea	chr1:169435182-169435183	-0.21992	0.000728791	1.97038	1.58043	2.75009	1.87365	1.9412	2.95746	0.450442	2.36922	-0.331125	0.415706	1.21233	3.28239	1.83635	2.19027	1.79734	-0.133215	1.76153	1.54662	2.29879
4058507	Open Sea	chr1:226288762-226288763	-0.205942	0.0104366	1.22212	2.17088	3.39953	3.2386	-0.0871673	2.56272	-0.997977	3.04235	-0.447084	0.16641	0.972788	3.97008	1.90523	1.66614	1.30751	2.52785	2.70219	1.80959	3.92253
4093811	Open Sea	chr1:227747122-227747123	-0.236482	0.0151271	1.63344	0.286569	3.64544	2.20212	4.63248	2.39931	-0.978677	3.24969	-0.220949	6.26236	4.31675	3.68777	1.06064	3.71707	8.27803	3.30683	3.07827	5.0422	2.02958
4093813	Open Sea	chr1:227747124-227747125	-0.253133	0.0147308	1.51533	0.056251	2.50123	2.82862	4.93699	2.14167	0.958588	5.1827	-0.322832	6.11796	3.04559	3.79292	0.928141	3.28192	6.99578	3.39434	1.90679	4.64702	0.928141
4093815	Open Sea	chr1:227747126-227747127	-0.239454	0.0152864	1.70273	0.0378384	0.567576	2.55409	3.1706	1.56084	-0.108685	4.00371	-0.922312	6.12983	3.48114	4.9018	0.450722	3.746	6.65956	5.1763	1.95814	3.8998	1.50241
4125377	Island2316	chr1:228658958-228658959	-0.148696	0.132587	0.869288	1.38469	1.30729	1.2421	1.53247	0.926216	1.41657	1.38469	0.626122	0.192653	1.47025	1.1384	0.963265	1.68571	1.73388	1.49306	1.11378	1.92653	1.05959
4125379	Island2316	chr1:228658966-228658967	-0.144351	0.0412827	1.04599	1.38312	0.898732	1.14654	0.981771	1.94502	1.16701	1.66407	-0.944723	0.981771	1.43931	1.94502	0.981771	1.66407	1.5322	1.54045	1.94502	-0.583505	1.94502
4125381	Island2316	chr1:228658973-228658974	-0.231778	0.00918416	2.38751	1.70069	2.41389	2.51833	1.37909	1.52899	1.1575	2.67823	0.719524	-0.359762	2.53547	1.85021	1.72686	1.82513	2.44638	2.34512	2.08958	1.74201	0.822313
4125383	Island2316	chr1:228658993-228658994	-0.270094	0.0472495	2.67132	2.19462	2.81406	1.82914	1.76348	1.7773	1.34003	2.18872	0.394956	1.32176	2.38584	0.990134	0.975542	1.93858	2.38584	2.36123	2.38769	0.625348	1.87604
4125385	Island2316	chr1:228658996-228658997	-0.214054	0.0554983	2.76956	1.44063	2.97316	2.97316	2.22392	1.24794	2.59854	1.85822	1.41225	-0.00675718	1.97683	2.48024	1.58568	2.15877	2.57463	2.97316	2.49896	2.1927	2.08121
4125387	Island2316	chr1:228659024-228659025	-0.248007	0.00376353	2.59025	1.9329	2.50625	2.15421	2.0102	1.72217	2.1193	2.25022	1.38614	-0.226822	2.44428	0.863418	1.4857	1.70756	2.04449	1.38614	2.55571	0.848483	1.77017
4125389	Island2316	chr1:228659026-228659027	-0.262751	0.0163608	2.87289	3.38769	3.29518	1.80896	2.32789	1.61162	1.36046	1.74318	0.230231	1.61162	2.42243	-0.501092	1.30464	2.6075	1.87614	2.53254	2.51483	2.27228	1.41428
4125391	Island2316	chr1:228659041-228659042	-0.338586	0.000816966	3.11105	3.4469	2.4526	2.35686	2.7151	2.1742	0.424234	3.3111	1.45831	1.19892	2.51889	1.24775	1.88549	3.03024	2.21143	3.18176	3.56357	2.21759	2.96964
4125393	Island2316	chr1:228659052-228659053	-0.359663	0.000816966	4.75421	3.66067	3.3753	3.13781	2.00193	2.59193	2.01985	4.0984	0.840811	1.6794	2.87277	0.983404	2.56016	2.59193	3.13781	3.63475	3.14184	1.21026	1.6794
4125395	Island2316	chr1:228659054-228659055	-0.27308	0.00522893	4.4449	4.45576	3.48363	3.79709	1.72721	2.96252	0.0695603	4.43193	1.08579	0.586915	3.64127	1.95227	0.187813	1.78422	2.94525	2.45368	4.06481	2.58243	2.94525
4125397	Island2316	chr1:228659059-228659060	-0.3105	0.0216562	3.98311	2.90269	3.52916	2.74835	2.18241	2.05379	1.73809	3.41844	1.57146	1.41069	3.49052	2.05379	2.37535	2.4773	3.34001	2.29496	3.87287	2.30544	2.43966
4125399	Island2316	chr1:228659063-228659064	-0.375374	0.000194827	4.16548	3.60177	2.89496	2.36558	2.7823	2.97486	1.52874	3.58223	3.20125	2.15988	3.20125	1.81275	2.91198	2.57011	3.34588	3.4182	4.05683	2.52209	1.96152
4125401	Island2316	chr1:228659073-228659074	-0.382037	0.000194827	4.06741	3.16965	3.30023	2.5648	2.5648	2.5648	1.49194	4.12468	2.5648	1.65287	3.35778	1.76686	2.76304	2.50919	3.50646	3.70471	3.61964	1.87094	2.68479
4125403	Island2316	chr1:228659084-228659085	-0.14139	0.199796	2.40389	1.78171	-0.240389	0.641038	1.22866	1.37198	1.25421	1.56886	2.40389	2.40389	1.9538	0.288467	1.90022	1.14471	2.40389	2.11008	2.23863	1.55772	2.40389
4125405	Island2316	chr1:228659093-228659094	-0.153424	0.155334	1.7785	2.05163	0.964094	1.81293	-0.524364	1.2444	1.58914	1.51848	1.3206	2.26049	1.14158	1.21617	2.26049	1.2965	2.05617	1.76581	1.96212	0.694011	1.73833
4125407	Island2316	chr1:228659102-228659103	-0.253041	0.0532865	3.6324	2.16911	3.45897	1.01677	0.332431	0.99848	0.969928	2.83352	2.75443	3.19341	2.75443	3.01266	3.72995	2.10886	3.02667	3.36413	3.65901	2.08375	4.21772
4543665	Open Sea	chr1:247681276-247681277	-0.212954	0.0270487	0.827397	-0.10658	2.02114	-0.706092	-0.995613	2.49906	1.34772	2.48535	0.521874	4.14996	1.62002	4.27842	0.167483	1.48298	2.22295	4.16631	3.5952	-0.0193782	1.49212
4543671	Open Sea	chr1:247681342-247681343	-0.213863	0.0216918	1.386	1.81074	3.87706	2.184	-0.589051	2.48325	2.16975	2.849	0.43187	2.16053	0.28875	2.583	0.898335	1.81074	3.10344	4.08693	4.05383	2.431	-0.231
4543697	Island2450	chr1:247681516-247681517	-0.230662	0.302045	0.908781	0.932627	2.63568	1.0598	0.606737	0.880814	2.419	1.19113	1.42226	3.58802	2.419	2.00369	2.03564	0.932627	1.86525	4.08024	2.36866	0.283119	-0.571234
4543699	Island2450	chr1:247681519-247681520	-0.244946	0.229614	0.663824	0.099978	3.39631	1.39249	-0.166042	1.41723	1.57465	0.782628	2.06043	3.14893	1.57465	2.56138	0.313506	1.51237	2.02618	3.39631	1.92291	-0.102428	0.0566052
4543701	Island2450	chr1:247681522-247681523	-0.234616	0.242877	1.8766	1.31031	3.8544	1.01955	0.632981	2.71132	2.16699	1.19673	0.310839	3.06695	2.00559	2.60373	2.21891	2.21891	1.37391	3.8544	2.72457	-1.20783	0.310839
4543709	Island2450	chr1:247681553-247681554	-0.255228	0.0163652	0.984212	0.999659	3.4073	-0.0445722	0.121758	2.41804	2.69077	1.2346	1.62243	3.46118	2.58943	2.2552	2.32964	2.61895	1.63747	3.15472	3.06591	1.26882	1.17238
4543711	Island2450	chr1:247681570-247681571	-0.258436	0.0105907	0.91604	1.9889	3.88681	0.768819	0.643468	2.38334	2.2901	2.35451	0.768819	3.9402	3.07528	1.98274	1.65592	2.87026	2.37429	4.80512	2.85297	-0.38441	1.61452
4543713	Island2450	chr1:247681581-247681582	-0.260262	0.0129094	0.911645	2.05771	3.43724	0.496689	-0.0688798	2.09142	2.48126	1.91445	1.41305	4.61433	1.24591	1.48468	1.06021	1.37807	1.77681	3.68866	3.80583	1.31277	1.17906
4543715	Island2450	chr1:247681584-247681585	-0.294965	0.135208	1.2351	1.70742	3.31836	0.216756	0.128612	2.66807	2.3692	1.29217	0.146363	3.35425	2.32384	1.1485	1.88532	2.42105	2.12242	3.82086	2.3692	0.55464	2.94986
4543717	Island2450	chr1:247681594-247681595	-0.27259	0.00497284	0.462271	2.28662	3.23082	0.76051	0.00969799	2.81807	2.37358	1.26236	0.583921	4.07747	2.98234	1.17346	2.52745	3.17367	3.45062	2.65933	3.31344	2.28662	2.15134
4543719	Island2450	chr1:247681602-247681603	-0.255754	0.198572	0.00758796	1.81475	2.81935	-0.29079	-0.341458	2.25802	2.4225	1.03977	0.217016	3.67257	2.52889	1.1129	2.13677	2.88498	2.49118	3.12407	2.65487	1.84423	2.39274
4543721	Island2450	chr1:247681604-247681605	-0.301409	0.00714929	0	2.77276	4.8033	0.216816	0.128483	3.03152	3.02086	0.693811	1.76496	4.42497	3.0754	0.59959	2.1941	1.86795	4.31408	3.35892	3.093	1.92725	4.83954
4543723	Island2450	chr1:247681610-247681611	-0.272389	0.247582	0.20601	1.66616	2.84842	0.883246	0.832767	2.20886	2.03292	2.20203	-0.268438	4.83188	2.23072	1.61063	1.96295	1.65973	3.61476	3.93182	2.84066	0.624117	3.03177
4543725	Island2450	chr1:247681613-247681614	-0.304274	0.00790844	0.43543	1.98519	3.40818	1.25791	0.0967623	2.45567	1.39479	2.15901	0.203201	4.07664	2.09249	2.00145	2.49163	2.79667	3.61171	3.22731	2.69211	1.79978	2.47598
4543731	Island2450	chr1:247681653-247681654	-0.322957	0.000392793	0.218525	1.14701	2.63091	2.08243	0.100237	3.36222	1.81225	2.33838	0.137143	4.43122	2.51756	2.78205	2.48306	3.31103	4.12385	3.96447	3.28958	3.1347	3.41021
4543733	Island2450	chr1:247681661-247681662	-0.268537	0.00838947	0.895147	1.06683	2.67782	1.01452	0.363972	2.51848	1.15272	2.44261	-0.144747	3.5495	2.10659	2.14859	2.87027	2.44261	3.93421	2.93779	3.74155	3.22665	2.62354
4543751	Island2450	chr1:247681729-247681730	-0.31517	0.00714929	0.96412	1.25043	3.38982	2.33843	0.438236	2.68286	1.36145	0.883215	0.306765	3.95761	2.45616	2.61968	2.24961	2.53612	3.75631	3.13777	1.95356	1.80553	3.13777
4543753	Island2450	chr1:247681738-247681739	-0.347974	0.000439685	1.25279	2.24824	3.21915	3.98947	1.70151	3.34078	1.80013	3.11373	0.141533	4.23273	2.69208	3.62458	2.71235	2.57414	4.74279	4.05897	2.46357	3.30262	1.80013
4543755	Island2450	chr1:247681740-247681741	-0.230109	0.0147308	0.750306	3.29757	4.462	3.20706	0.11155	2.84712	0.182711	2.8102	-0.157625	5.19136	1.94593	3.51054	0.627468	2.23971	4.45238	3.45273	2.47003	2.90358	1.27237
4543757	Island2450	chr1:247681742-247681743	-0.316558	0.000439009	1.35422	1.88964	2.6572	3.72565	0.462189	3.27552	1.54424	2.37896	0.16513	3.77017	2.74573	4.03204	3.52671	2.39635	4.10803	3.43628	3.36898	3.6065	2.32986
4543759	Island2450	chr1:247681749-247681750	-0.304794	0.000388573	1.5085	2.38307	3.71998	3.68784	0.180227	3.00415	1.65143	2.88414	0.289931	4.84976	2.36977	3.56996	4.04146	3.47566	3.86465	3.83939	2.92791	1.9613	2.15545
4543761	Island2450	chr1:247681760-247681761	-0.297412	0.00333568	1.39807	2.09429	2.9495	2.52762	1.3147	2.86843	1.66831	2.6294	0.571608	3.02381	2.93385	3.75628	1.99834	1.91791	4.31859	2.45411	2.36646	2.16925	0.631056
4543763	Island2450	chr1:247681766-247681767	-0.31985	0.00101853	1.28123	1.73332	2.10918	2.25269	1.20028	2.73976	1.40812	2.34837	-0.130465	2.34837	1.87	2.73976	2.96342	1.92628	3.08767	2.57496	2.73976	1.98959	2.47883
4543765	Island2450	chr1:247681769-247681770	-0.322981	0.000863981	0.983341	2.15921	2.66158	2.00601	0.826006	2.77838	1.78524	2.09678	-0.179567	2.89102	2.51831	3.18602	2.14762	2.72832	3.30402	2.73886	2.92857	2.89102	0.969659
4543767	Island2450	chr1:247681781-247681782	-0.284135	0.0119492	0.147611	1.8704	1.8533	2.46067	0.856367	2.06716	1.82122	1.38454	0.441802	3.29687	1.8752	1.88829	2.79204	2.39508	2.44553	1.37852	2.20285	2.19013	1.88829
4543769	Island2450	chr1:247681784-247681785	-0.300075	0.00210152	1.28732	1.13284	2.42125	1.95672	0.978362	1.80225	0.901123	1.96513	-0.514928	2.44591	2.28039	2.76188	2.30362	2.403	2.68907	2.36867	2.30887	1.67351	1.02986
4543771	Island2450	chr1:247681790-247681791	-0.274782	0.00119925	1.4691	0.632628	1.27587	1.97364	0.820408	2.34947	1.67551	1.93246	0.050083	2.88812	2.37727	2.44214	2.66407	2.24437	2.56517	1.94709	3.10097	2.88812	1.66653
4543775	Island2450	chr1:247681812-247681813	-0.162991	0.1268	-0.791518	1.58121	0.0370557	1.32821	0.655215	0.559474	1.75864	1.85641	0.0160337	1.18461	1.88244	2.02153	1.21429	2.35611	0.831541	2.38101	2.11823	0.489028	0.797503
4543777	Island2450	chr1:247681833-247681834	-0.166447	0.110836	-0.27059	-0.721913	-0.0161202	0.744588	0.757651	0.889416	0.767364	1.6017	0.575815	0.649415	1.75814	2.56942	1.5153	0.739172	2.07701	1.5153	1.96042	-0.0582808	0.889416
4543779	Island2450	chr1:247681844-247681845	-0.217759	0.0213673	-0.300774	-1.30385	-1.84589	0.7009	0.872791	2.23455	0.343345	1.86606	1.18204	0.872791	1.23438	3.23181	1.90891	2.64358	2.56019	1.50186	2.34436	1.96706	2.01067
4543781	Island2450	chr1:247681853-247681854	-0.154783	0.0832331	1.20649	-1.27591	-0.921676	1.5684	1.76161	1.65271	0.803295	1.16266	0.728943	1.32601	1.47975	1.23454	2.11394	1.68175	2.32533	1.16266	0.999315	1.69115	0.86319
4543783	Island2450	chr1:247681871-247681872	-0.195827	0.0198728	0.717732	-0.995437	0.927256	1.09749	1.65804	2.40759	1.13678	1.56815	1.03621	3.31059	0.382493	2.34364	2.62964	2.11893	3.18413	2.79092	2.90821	2.68972	1.45107
4543785	Island2450	chr1:247681881-247681882	-0.18531	0.304636	0.7898	-0.211424	-0.32421	0.908673	1.79784	2.73932	1.00056	2.45768	0.273552	3.26236	2.27781	0.8215	2.21628	1.80694	3.03618	2.38145	2.12587	-0.39893	1.92337
4543787	Island2450	chr1:247681887-247681888	-0.135796	0.24927	0.896118	0.456513	0.961591	0.107415	-0.168189	1.61048	0.786217	1.46502	0.315211	2.00469	1.56199	1.61048	2.43474	1.57464	1.63275	1.85291	1.90008	2.43474	1.29345
4543789	Island2450	chr1:247681894-247681895	-0.174339	0.328832	2.40508	1.47422	0.810717	1.70523	2.05211	0.14503	1.11362	1.9093	1.34734	1.87088	0.93833	1.42915	1.74467	2.88594	2.05211	3.63783	2.30657	2.65619	1.33312
4543791	Island2450	chr1:247681896-247681897	-0.173044	0.331706	2.03832	-0.70287	0.632583	1.7087	1.16529	1.20142	1.05431	0.612968	0.976209	2.74119	0.512091	1.47603	1.958	2.06277	1.21651	3.16292	1.19873	1.83116	1.32934
4543793	Island2450	chr1:247681916-247681917	-0.00403438	0.926571	0.104377	-1.68705	-1.49607	1.49607	0.213724	0	-0.166229	-0.581803	-1.59924	0.561024	0.374016	1.49607	0.498688	0.498688	-0.0383606	1.49607	0.889552	1.49607	-1.35358
4543795	Island2450	chr1:247681931-247681932	-0.150551	0.0754158	1.04856	0.375273	1.45718	1.59491	-0.469091	1.6205	1.40727	3.05666	1.52455	3.28364	1.31346	2.68052	0.187636	0.852893	1.60177	2.68052	2.52852	-0.197512	0.268052
4543797	Island2450	chr1:247681933-247681934	-0.118864	0.245019	0.692027	0.387695	2.03357	1.22656	0.528771	-0.282412	1.61035	1.93482	0.39767	1.43008	0.476011	0.889296	1.68245	1.31537	-0.0120175	1.97087	1.33302	-0.495881	1.61035
4543799	Island2450	chr1:247681939-247681940	-0.153415	0.0369367	0.503401	-0.881685	0.896682	1.18485	1.04749	0.583662	1.59496	2.21137	-0.535987	1.89911	0.580139	1.2097	2.24508	1.13265	1.01707	1.3437	1.19489	0.824447	2.38298
4543801	Island2450	chr1:247681948-247681949	-0.148172	0.249617	1.21579	1.1243	1.09109	-0.143206	1.35967	0.895845	0.71801	1.33778	0.925548	2.04099	-0.350165	2.07308	1.30931	1.32654	1.66059	1.8003	0.869886	1.52753	2.61862
4543803	Island2450	chr1:247681950-247681951	-0.0981066	0.197986	0.741621	0.355978	1.69735	0.62966	1.3759	0.748763	0.27885	0.909292	0.922003	1.55828	1.03758	1.55828	0.883024	1.08441	1.65982	0.641354	1.08441	-2.43993	1.13741
4609477	Open Sea	chr2:1370524-1370525	0.232878	0.0357551	-1.04302	-1.78223	-2.35845	-1.40907	-0.811061	-0.115194	-1.8804	0.426036	-0.927039	-0.774818	-1.08354	-2.29703	-2.0095	-1.97084	-1.66401	-1.43237	-2.50353	-1.07465	-0.0137136
4609479	Open Sea	chr2:1370541-1370542	0.210688	0.049506	-1.0101	-1.77589	-2.16458	-1.38773	-0.731398	0.0103889	-1.80815	0.640551	-0.963608	-0.999013	-1.04474	-1.98869	-2.07536	-1.80245	-1.51168	-1.45125	-2.29321	-0.598317	0.0985463
4609483	Open Sea	chr2:1370616-1370617	0.246016	0.0282185	-0.810012	-1.91452	-2.63541	-2.01244	-1.03998	-0.359267	-2.45264	0.51556	-1.32362	-0.989932	-1.22563	-2.38079	-1.86585	-2.39141	-1.38465	-1.51549	-2.62265	-1.92022	0.378176
4609487	Open Sea	chr2:1370657-1370658	0.22372	0.0451845	-0.563405	-1.5138	-2.30722	-1.82427	-1.51749	-0.247321	-2.06523	0.480886	-0.904871	-1.34338	-1.19827	-2.19603	-1.34338	-2.22168	-0.901524	-0.364777	-2.36363	-1.2041	0.319428
4609489	Open Sea	chr2:1370660-1370661	0.22397	0.0463929	-0.516424	-2.0689	-2.58499	-1.76375	-2.13344	-0.25447	-2.42619	0.844667	-1.49247	-1.94313	-2.02707	-2.34112	-1.0355	-2.40339	-1.39004	-0.412357	-2.50976	-1.30918	0.85541
5179223	Open Sea	chr2:27988897-27988898	-0.230608	0.0284076	-0.235109	6.30092	4.62136	4.11441	0.644654	1.53725	-0.417582	0.46475	-1.33228	2.19182	3.88266	3.49725	4.99607	4.23196	4.44095	2.89772	5.24888	3.19748	4.20721
5469951	Open Sea	chr2:43903452-43903453	-0.240454	0.0135074	-0.620711	1.28736	1.08895	0.430362	0.999279	0.041772	0.0356142	2.46648	0.93214	3.56914	2.51218	3.42392	3.15007	3.21628	4.4566	3.81026	2.74609	2.85052	3.68543
6808765	Open Sea	chr2:121412390-121412391	-0.262566	0.0081238	0.877962	2.86891	2.64604	2.33403	2.33403	1.01851	-0.60782	1.39799	2.24893	2.33403	2.47803	3.15307	2.80205	5.03815	3.21807	4.90814	3.64449	3.15307	2.33403
6987033	Open Sea	chr2:130750824-130750825	-0.28019	0.0296093	-0.408693	0.411778	1.87999	0.895324	1.36805	1.1171	1.18588	-0.365511	0.61304	6.8388	2.75507	5.31301	1.71651	2.61827	6.91509	4.16867	5.28078	6.91509	5.14954
7035989	Island3441	chr2:132404285-132404286	-0.203207	0.12832	-0.125757	0.876473	1.12738	0.89958	0.00221966	0.460499	0.434871	1.58655	-0.675269	3.11098	2.02385	1.94368	3.89569	2.11636	1.87008	1.49472	3.3722	3.22643	2.16816
7035991	Island3441	chr2:132404287-132404288	-0.16996	0.350576	-0.721951	0.241121	0.831142	-0.403952	-0.461886	-0.0466934	-0.375882	1.41637	-0.412458	3.12327	1.94839	2.39174	0.776277	1.40511	1.83438	2.36735	3.1633	2.33078	1.36917
7035993	Island3441	chr2:132404295-132404296	-0.248788	0.0430004	-0.12253	0.299151	2.46036	1.25715	-0.198106	0.53594	-0.0595102	2.03415	-0.469139	2.84474	2.24872	2.74937	2.23441	2.0192	1.75906	2.74937	3.76479	2.47629	2.70498
7035995	Island3441	chr2:132404298-132404299	-0.220471	0.333639	0.743055	0.436778	2.14997	0.550411	-0.886451	0.504061	-0.0254036	1.62252	-1.0851	2.89883	1.95146	2.78046	3.63271	2.37001	1.90027	1.53114	3.0823	3.0135	2.49393
7035997	Island3441	chr2:132404312-132404313	-0.260602	0.0242841	0.934232	0.33337	2.39602	0.669321	-0.251529	1.13994	0.375435	1.34633	-0.274967	3.36729	2.92373	3.24486	3.8041	2.67352	2.45232	2.61571	3.96855	2.79966	2.82219
7035999	Island3441	chr2:132404315-132404316	-0.27239	0.0364289	0.634975	0.186301	2.84643	1.15826	-0.671087	1.17248	-0.0113111	2.04505	-0.533886	3.70644	2.59675	3.45349	3.76156	1.96594	2.15364	3.70644	3.81959	3.57206	2.98976
7036001	Island3441	chr2:132404324-132404325	-0.273255	0.0197949	0.40343	0.426126	3.24384	0.898516	0.014434	1.50934	-0.0242446	2.377	-0.737036	2.75794	3.54777	3.30212	4.63473	2.46713	3.06452	3.06452	4.06016	3.84719	2.86789
7036003	Island3441	chr2:132404336-132404337	-0.291878	0.0157351	0.625176	0.68871	2.91791	1.70387	0.243053	1.48491	-0.605074	1.91401	-0.108242	3.39634	3.28011	3.11196	4.27492	2.34525	3.08567	2.74394	4.28175	3.62526	3.7008
7036005	Island3441	chr2:132404343-132404344	-0.26715	0.0208068	0.504598	0.490701	0.698223	1.48208	0.275003	1.69275	0.0711096	2.12942	0.0547626	3.56739	2.87239	2.79289	4.16196	2.47146	3.34667	3.2668	3.32096	3.7407	3.53219
7036007	Island3441	chr2:132404351-132404352	-0.268215	0.0147308	-0.498498	0.985127	1.11322	1.37494	0.414826	1.71705	-0.1991	2.42479	0.40873	2.89406	3.43929	3.86868	4.20954	2.10477	3.44493	3.65565	4.20954	3.59271	3.20897
7036009	Island3441	chr2:132404376-132404377	-0.236648	0.0629414	-0.559032	0.923671	1.9339	-0.738482	0.472202	0.875617	0.593626	1.96138	-0.0359773	3.29193	2.28534	3.74164	4.30458	1.43083	3.68372	4.18236	3.18199	3.29193	5.11374
7036011	Island3441	chr2:132404387-132404388	-0.245945	0.0780467	-0.663858	0.785745	1.36102	0.66744	0.616997	1.05939	-0.329945	1.6306	-0.0697961	4.01826	2.87663	4.01826	4.68956	2.28011	2.60107	2.7316	3.39901	3.47639	4.05491
7036013	Island3441	chr2:132404394-132404395	-0.258798	0.0297926	-0.107955	0.553978	1.03907	0.368906	1.5112	1.98976	0.867572	2.15507	-0.273127	3.70672	2.59955	4.28351	5.49944	2.12564	3.54347	4.10603	3.29604	4.10603	5.24482
7036015	Island3441	chr2:132404402-132404403	-0.268724	0.0245151	-0.237287	1.26185	1.86032	-0.182834	0.95636	1.58774	0.991622	1.86032	0.617377	3.91715	2.53117	3.99687	4.1771	1.73834	3.54059	3.00366	3.0693	4.46411	4.51324
7036017	Island3441	chr2:132404424-132404425	-0.259521	0.0400308	-0.341021	0.736032	1.24369	-0.0164811	0.521902	1.89863	1.32107	1.5069	-0.206499	3.61761	2.85299	2.85299	4.68852	1.60745	3.53559	2.85041	2.95366	4.09905	3.8195
7036019	Island3441	chr2:132404442-132404443	-0.270446	0.0134702	-0.0740747	0.893946	0.344569	1.19193	1.28022	2.0558	1.64643	2.13554	0.216714	5.99576	3.57189	3.37713	5.86032	1.92861	5.36368	5.08432	3.791	5.50557	5.72962
7036021	Island3441	chr2:132404480-132404481	-0.225147	0.00977579	0.661332	0.494924	1.31458	0.442275	1.0957	1.97852	1.37927	2.91692	0.46443	4.53914	2.72884	3.95254	6.06712	1.93929	4.65192	5.47598	4.0735	6.89072	3.3233
7036023	Island3441	chr2:132404483-132404484	-0.167619	0.025287	0.274598	0.496328	1.6009	-0.793213	1.95194	1.01268	2.4865	3.3931	0.196012	6.91889	4.94047	4.00124	4.55155	1.98172	3.00499	5.42209	4.63813	7.06153	5.21416
7036025	Island3441	chr2:132404503-132404504	-0.248417	0.0230306	0.132381	0.356202	2.0313	0.263682	0.409767	1.69847	0.398881	2.57491	0.0780638	3.31685	2.40134	3.59258	5.28752	2.40382	5.10537	3.68461	3.96204	5.02341	3.24746
7036027	Island3441	chr2:132404539-132404540	-0.243732	0.0206815	0.516687	1.50853	0.590249	-0.263334	1.18707	2.67737	0.22223	2.81675	-0.319154	4.8252	2.88748	3.92611	7.23794	2.82526	4.69687	4.27179	5.00666	5.57219	3.55494
7036029	Island3441	chr2:132404557-132404558	-0.266199	0.00613608	0.796177	2.90799	2.74418	0.0397857	1.55519	2.29107	0.74572	2.06323	0.466699	5.07467	2.49842	3.6345	6.2873	1.80815	4.53942	3.91303	3.97615	4.74875	4.90177
7036031	Island3441	chr2:132404571-132404572	-0.244278	0.0110601	1.09504	2.01308	3.20867	-0.235128	1.61221	1.67077	0.755573	1.99456	0.263812	4.38707	2.98156	3.36505	6.17435	1.88047	4.71666	3.45978	5.26221	6.18813	3.93977
7036033	Island3441	chr2:132404574-132404575	-0.205623	0.0297926	0.300325	1.12132	3.28658	-0.724697	1.13028	2.23367	0.253937	3.13817	-0.312435	6.68444	3.08182	4.30215	6.34095	1.39724	3.39657	4.36154	5.19729	5.32862	4.18037
7036035	Island3441	chr2:132404595-132404596	-0.221707	0.0169805	0.327564	0.92408	2.91441	0.0355415	1.62316	2.00217	1.08459	2.42442	0.308791	5.69257	2.79929	3.83164	5.93648	2.89921	3.918	3.08027	6.53175	7.51901	4.86327
7036037	Island3441	chr2:132404600-132404601	-0.23417	0.030137	0.053118	1.507	3.00262	-0.459314	1.49043	2.22059	0.496929	2.41779	-0.0936323	5.01699	2.33764	1.99036	4.60196	2.09722	3.97343	3.33634	5.23993	6.78811	4.06821
7036039	Island3441	chr2:132404608-132404609	-0.241727	0.0195859	0.885502	1.16402	3.18571	-0.341364	1.66481	2.37816	1.82796	2.84582	0.0803713	6.16225	2.2795	3.37265	4.55044	2.41101	4.50195	4.11639	5.10223	6.81034	4.31606
7036041	Island3441	chr2:132404611-132404612	-0.25141	0.0184139	0.522712	2.0978	2.52304	-0.127323	1.63254	1.16592	1.45168	1.9125	0.093895	5.44249	2.05986	3.536	5.54451	3.50969	4.59157	4.01998	4.92072	6.73687	4.42696
7036043	Island3441	chr2:132404623-132404624	-0.209257	0.0215071	0.151615	1.74808	2.25073	-0.679923	1.69689	2.37152	2.26578	4.05642	0.382779	7.3471	2.41055	4.75616	6.95743	1.95956	5.47578	4.36047	5.2003	9.45519	4.05112
7036045	Island3441	chr2:132404637-132404638	-0.259622	0.0206815	0.143299	1.51819	1.59258	-0.605758	1.09456	1.56248	1.3255	2.65744	0.779183	5.23714	2.1654	3.37174	6.14159	1.78857	4.10861	4.10012	4.3901	6.42829	5.12356
7036047	Island3441	chr2:132404694-132404695	-0.204328	0.0119267	1.40336	1.71639	0.908978	-0.180992	0.967832	1.3678	2.38329	3.53087	1.00474	5.88304	1.83888	2.05664	5.94952	3.52417	4.79558	4.34315	4.28781	7.5007	4.18242
7036049	Island3441	chr2:132404711-132404712	-0.209421	0.0176942	0.190129	1.14613	3.9536	-0.213137	0.760264	0.203184	1.54808	4.18374	0.850096	6.4235	2.01967	2.41318	5.43046	2.22371	6.75507	5.80299	5.29066	7.32852	5.03628
7036051	Island3441	chr2:132404720-132404721	-0.231534	0.0338075	-0.0574059	0.334896	1.0026	-0.822786	0.877571	0.705629	0.746335	1.85465	-0.0458221	4.66011	2.18123	2.47263	5.22182	2.87842	4.02129	4.66011	4.9316	4.78305	3.21909
7036053	Island3441	chr2:132404731-132404732	-0.262886	0.0081238	0.042805	2.54259	3.06664	0.337172	0.558576	1.73269	1.57411	2.19347	1.11702	4.74574	3.0569	3.87964	6.17809	3.64867	4.21465	5.02979	5.16429	6.2364	5.4153
7036055	Island3441	chr2:132404738-132404739	-0.24985	0.0214389	0.46548	2.12684	3.7524	-0.655209	0.89023	2.06768	0.581165	1.72711	0.581165	4.37816	2.55784	2.86968	4.65701	2.95717	5.56581	4.23051	4.87303	3.44333	3.61053
7036057	Island3441	chr2:132404743-132404744	-0.212141	0.0223739	-0.00453665	1.81069	2.62286	-0.76506	1.31098	1.47617	0.101676	2.87164	0.302368	4.37981	3.16431	3.64314	5.62293	3.34751	3.94841	4.01783	4.88468	4.2894	4.62537
7036059	Island3441	chr2:132404761-132404762	-0.248755	0.0208068	0.220403	0.522267	1.40742	0.271383	1.12726	0.5249	0.896845	1.68199	0.398001	4.52746	2.35326	3.01838	4.83946	3.02984	3.25765	3.85888	5.35649	5.21208	3.23659
7036061	Island3441	chr2:132404765-132404766	-0.258801	0.0214389	0.479935	0.0567196	2.71053	0.0567196	1.12483	1.24668	0.597664	2.0837	0.236517	3.60996	1.71027	2.86875	3.20555	2.55087	2.69041	2.81984	4.03601	3.72458	2.91765
7036063	Island3441	chr2:132404781-132404782	-0.196373	0.109133	0.46732	0.935965	4.0638	-1.00506	-0.237634	0.43439	1.19239	1.52575	1.13496	4.31616	0.957334	1.69628	3.13069	1.85636	2.65793	2.05864	3.42405	2.94143	2.02312
7036065	Island3441	chr2:132404783-132404784	-0.0156229	0.91366	0.022669	-0.265228	-0.265228	0.413883	2.83214	-0.265228	-0.265228	3.47743	-0.265228	2.36633	-0.265228	3.69758	2.37665	2.79695	-0.265228	-0.265228	-0.265228	-0.265228	-0.265228
7036067	Island3441	chr2:132404790-132404791	-0.266628	0.0253924	0.826949	0.544442	0.481762	-1.10335	0.712751	1.27794	0.858265	2.6779	0.749473	4.21021	1.7902	3.96896	4.74094	2.37623	5.14724	3.41411	5.05372	4.58654	4.74094
7036069	Island3441	chr2:132404794-132404795	-0.232812	0.0500652	1.13028	-0.178553	2.09961	-0.40351	0.580661	0.862305	0.251403	2.49408	0.605999	3.01297	0.985407	1.54482	2.94755	2.59714	2.69666	3.25781	4.0332	4.27515	3.69841
7036071	Island3441	chr2:132404798-132404799	-0.256393	0.0169387	0.853568	2.03967	4.34592	-0.449557	1.11341	1.23795	0.630496	2.27992	0.630496	4.98392	1.75051	3.00683	5.2988	2.47695	4.34701	4.47628	4.1933	5.4718	4.09717
7036073	Island3441	chr2:132404804-132404805	-0.284248	0.0077393	1.51428	0.662001	4.35388	0.430545	0.878691	2.41778	0.651873	3.59256	0.754315	4.87082	2.1683	3.14126	6.12143	2.25351	2.76766	2.57552	4.36204	5.72216	4.43142
7036075	Island3441	chr2:132404808-132404809	-0.267798	0.00954767	0.389859	0.795624	3.59611	0.0704984	0.768432	2.30969	0.557878	2.34387	0.664434	5.77209	3.01385	3.73238	6.58656	3.49613	3.21939	3.67898	2.92736	5.83185	2.7444
7036077	Island3441	chr2:132404851-132404852	-0.200945	0.0773204	1.45278	0.339835	1.36247	-0.533064	0.918826	1.80482	0.179845	2.33576	0.15577	4.74521	1.04967	2.74286	3.20286	2.68874	1.56019	1.6605	2.62447	3.42319	2.52135
7036079	Island3441	chr2:132404853-132404854	-0.172776	0.0683287	1.61969	1.21002	0.988466	-0.00496028	1.65564	0.517431	-0.106646	1.43733	0.374629	4.43914	1.47841	3.35093	4.23029	2.74515	1.13624	2.27308	2.2043	4.0939	2.20981
7036081	Island3441	chr2:132404860-132404861	-0.244139	0.0397114	0.846362	0.380393	2.45281	-0.971634	0.730316	0.63616	-0.456295	1.86419	0.730316	3.58217	1.46593	2.90353	3.15916	2.63164	2.04531	2.36006	2.55427	3.84197	2.96965
7036083	Island3441	chr2:132404882-132404883	-0.223121	0.0543562	1.68406	0.939615	3.28323	-0.499641	0.0372602	0.874881	-0.826612	1.30687	0.808243	2.15877	1.25669	2.89722	2.51122	0.808243	1.28702	2.91126	2.68667	3.3303	3.26052
7036085	Island3441	chr2:132404884-132404885	-0.222502	0.0605082	1.48178	0.771384	3.27345	-0.0411606	-0.0595358	1.25076	-0.840625	1.90432	1.33865	2.96987	1.19733	2.53137	3.16891	1.68726	2.89944	2.78863	1.87774	2.85937	2.23629
7036087	Island3441	chr2:132404896-132404897	-0.190054	0.113892	0.855555	1.07747	2.2218	0.042241	0.00999908	1.3447	-1.01691	2.46293	0.912773	2.94401	1.09296	1.96902	2.34388	1.27686	1.67019	3.23419	2.7155	2.77474	2.24359
7036089	Island3441	chr2:132404927-132404928	-0.169913	0.431761	0.898812	-0.146515	2.46712	-1.06223	0.398337	0.34764	-0.212446	1.75677	0.562358	3.1867	1.41631	2.19528	2.19528	1.08947	1.97625	2.41749	1.69957	2.54012	3.1867
7036091	Island3441	chr2:132404939-132404940	-0.252982	0.0849899	-0.138558	0.268176	0.893921	-1.17886	0.0804529	0.0498933	0.232076	1.066	0.157751	3.67684	1.7641	0.0804529	2.38006	1.53045	3.17486	3.65763	2.98523	3.612	2.86318
8103855	Open Sea	chr2:206628491-206628492	-0.240054	0.0442614	3.02106	1.45851	2.40626	3.09976	1.35517	2.85727	0.384046	0.582569	2.60131	0.673952	0.308419	1.19941	-0.422648	0.465076	1.1453	2.86715	0.109037	2.13609	0.856719
8103857	Open Sea	chr2:206628521-206628522	-0.215623	0.0479174	2.88803	-0.924468	3.61166	2.92322	2.09709	3.04106	0.643109	1.10758	3.55658	1.1349	1.46883	0.510404	0.0334952	0.593344	2.13151	2.77419	0.131247	2.1437	-0.876966
8547289	Island3931	chr2:232348698-232348699	-0.24603	0.00465633	1.85189	2.7515	0.68421	3.28693	2.52844	3.67204	1.71744	5.26826	4.44798	6.13678	-0.935087	1.88461	4.04923	3.06771	1.18552	2.45425	3.42263	3.35576	-0.576216
8547291	Island3931	chr2:232348704-232348705	-0.225894	0.00950527	2.68892	3.68428	0.603141	4.90201	3.86694	4.76463	1.60907	6.71428	5.79501	7.58102	-0.948063	1.73591	3.31445	2.90589	1.33	0.471347	3.46544	3.56251	-0.902502
8547293	Island3931	chr2:232348714-232348715	-0.230758	0.0135234	1.75928	1.81185	0.166806	4.19881	4.02774	4.32525	2.26751	6.23503	7.09575	5.31693	-0.23457	-0.888898	4.22226	2.535	1.10583	2.60634	3.28398	4.30045	0
8547295	Island3931	chr2:232348740-232348741	-0.234265	0.00334565	2.84533	2.67831	2.1749	2.82415	3.15045	4.67268	1.46336	5.1598	5.36589	4.07633	-0.372876	0.0483078	2.54047	1.74391	1.33088	4.88931	3.27803	5.23591	0.600132
8547297	Island3931	chr2:232348742-232348743	-0.222179	0.00576707	3.48057	3.54319	2.47294	3.14753	3.47368	4.58416	1.13082	4.78075	2.28555	3.70528	-0.645178	0.0625519	2.71654	1.78273	1.27064	3.75411	3.17795	4.24459	0.561592
8547299	Island3931	chr2:232348762-232348763	-0.199605	0.00971258	2.20847	2.49873	2.00753	2.34298	2.85349	4.09514	0.0605752	5.76942	5.12811	4.41442	-1.4923	0.757191	1.73245	0.67426	0.978338	2.49873	2.03149	4.79756	0.902319
8547301	Island3931	chr2:232348788-232348789	-0.210725	0.0159778	1.05972	3.07178	1.71158	3.26425	1.13948	4.72721	-0.188014	5.20423	4.64908	3.40061	-0.902468	0.782139	1.90521	0.34878	0.668495	4.51234	1.89723	3.23106	0.676851
8547303	Island3931	chr2:232348794-232348795	-0.233018	0.0105719	1.78198	3.54429	1.07333	3.97223	3.08228	4.36143	-0.466468	4.65571	6.09516	3.15205	-0.987753	0.472808	3.23179	0.600391	1.21216	4.6119	2.0357	3.3238	-0.0207372
8547305	Island3931	chr2:232348804-232348805	-0.226452	0.00780733	1.97107	3.35394	1.6399	2.8918	4.40804	4.19813	-1.10201	5.51005	3.67336	2.55538	-0.762396	0.638846	3.5467	0.667885	1.74001	3.33942	1.97107	2.93869	0.183668
8547307	Island3931	chr2:232348827-232348828	-0.237351	0.0104366	1.06219	3.7766	1.61275	3.13432	3.93214	4.91286	-1.0854	5.37604	5.24998	4.1155	-0.612933	1.0902	4.90207	1.10821	2.70575	4.8358	2.72726	3.31715	-1.33921
8547309	Island3931	chr2:232348836-232348837	-0.195123	0.0204907	0.397703	2.78392	0.927974	3.53633	1.98852	4.06881	-1.07074	4.82094	3.07697	3.79626	-0.397703	1.57352	3.79626	1.19311	1.91781	4.17588	2.33248	3.29009	-0.556785
8547311	Island3931	chr2:232348846-232348847	-0.211939	0.0112011	1.85167	3.4441	0.85596	3.80621	3.4597	4.19348	-1.85167	6.68658	5.45214	5.45214	1.87812	3.2825	3.4597	2.16028	3.21838	6.11051	3.4484	2.40717	0.514352
8547313	Island3931	chr2:232348848-232348849	-0.239119	0.00579498	1.90116	4.36094	0.889209	4.34648	5.27866	3.89564	-1.1043	6.11762	6.75523	3.63802	0.561295	1.77027	4.60749	1.04035	3.53681	2.92956	3.78606	3.56718	-0.0906986
8547315	Island3931	chr2:232348857-232348858	-0.255884	0.002509	1.54811	4.8655	1.88466	4.74659	3.96448	3.44025	-0.836492	6.12307	6.02395	4.38849	0.330621	2.37307	5.01294	1.20733	2.65391	3.83342	3.70705	2.96431	-0.468337
8547317	Island3931	chr2:232348865-232348866	-0.250874	0.0099554	1.52156	2.94295	1.09599	4.13482	3.0309	4.67263	-1.40179	5.60544	5.18567	3.10785	-0.00887958	3.99835	6.10915	0.882668	3.69391	4.87785	3.65911	1.72264	-0.355183
9198633	Open Sea	chr3:15107106-15107107	-0.245814	0.00376626	0	0.217239	1.51358	2.47411	3.64048	0.43297	-0.247411	3.77008	2.47411	3.46376	1.61469	6.49724	4.47945	2.30917	4.47945	2.47411	4.4699	4.28847	4.28847
9620341	Island4392	chr3:42977831-42977832	-0.213173	0.0109381	1.14354	1.74929	1.19771	0.983976	2.16297	2.51756	2.57666	1.11285	1.31906	0.540062	0.0945563	2.30087	2.05015	2.13956	2.57666	2.747	1.50284	1.27651	0.3379
9620343	Island4392	chr3:42977839-42977840	-0.193603	0.0368262	1.08303	1.90731	1.1621	1.00673	1.84907	2.25287	1.87046	1.65408	0.851934	1.67773	-0.108858	2.29102	1.88836	1.80782	1.52596	2.14606	0.352614	1.46959	-0.773466
9620345	Island4392	chr3:42977845-42977846	-0.180537	0.0442614	1.11968	1.70911	2.49712	1.24002	1.84651	1.75873	1.45149	1.03254	1.03254	0.617569	-0.0567528	2.13911	1.18815	1.88013	1.68265	2.16628	0.728901	0.237182	0.483314
9620347	Island4392	chr3:42977851-42977852	-0.184705	0.0141996	1.09438	1.66536	0.860286	1.45616	1.44931	2.43748	1.88182	2.72238	0.298467	0.267855	-0.0994889	2.47926	2.16257	2.43748	2.70471	2.19641	0.513153	1.51574	0.696422
9620349	Island4392	chr3:42977860-42977861	-0.179443	0.0353708	1.68423	1.68423	2.03208	0.130053	1.57922	1.7134	1.63411	1.4067	0.613109	0.975401	0.544101	2.09678	0.774127	1.96347	1.90322	1.27731	0.702441	0.716621	1.33769
9620351	Island4392	chr3:42977862-42977863	-0.2068	0.0180697	1.66733	2.30417	3.41475	1.11492	2.16728	2.85169	1.09027	2.64429	0.0684405	1.71101	-0.146658	2.12166	1.83179	1.85426	3.3636	2.64429	0.726595	1.4177	0.479084
9620353	Island4392	chr3:42977864-42977865	-0.143009	0.0710478	1.97272	1.9499	2.8323	1.37062	0.374981	2.39411	1.59992	1.12494	-0.315773	0.374981	0	2.21238	0.899953	1.5348	1.84746	2.62486	0.265611	0.539034	-0.242634
9620355	Island4392	chr3:42977886-42977887	-0.214963	0.0746968	1.20417	1.61635	1.72357	1.91993	1.82393	1.9466	2.02139	1.7852	0.515537	1.59994	0.623135	2.55991	1.99377	0.77573	1.74216	2.19192	0.423211	0.861507	-0.068569
9620357	Island4392	chr3:42977889-42977890	-0.165505	0.160345	1.22335	1.0203	1.07568	0.4646	0.831761	1.78835	1.69035	2.44162	0.0939085	1.50254	0.32266	1.97208	0.392708	2.21397	0.894893	2.44162	0.531618	0.563451	1.36838
9620359	Island4392	chr3:42977896-42977897	-0.177478	0.0786153	0.799577	0.423305	0.745824	0.839184	0.799577	1.24426	0.726158	1.12881	0.649068	0.987712	0.482717	1.55212	0.936403	0.874831	1.12881	1.21348	0.851476	0.936403	1.55212
9620361	Island4392	chr3:42977933-42977934	-0.15036	0.0977934	0.84429	-1.23829	0.627187	1.52951	1.80371	2.10402	1.61822	2.57039	1.77517	2.10402	0.03127	2.40298	0.9381	1.84493	2.53287	2.75176	1.23221	1.43273	0.743779
9620363	Island4392	chr3:42977946-42977947	-0.209284	0.0755846	2.17121	-1.04249	1.9939	1.46449	2.15679	1.07507	2.22602	1.3491	-0.505914	0.910645	0.252957	2.13207	-0.404731	0.967835	2.44525	2.71929	1.22015	1.1498	3.03548
9620365	Island4392	chr3:42977953-42977954	-0.135435	0.124344	1.897	-1.64096	1.04339	-0.157703	2.49004	2.34676	1.57703	1.93843	-0.0404365	1.28652	0.35045	1.36676	0.119472	1.50534	1.25787	0.773911	0.858603	0.812407	2.34676
9620369	Island4392	chr3:42977981-42977982	-0.188993	0.0867006	1.85312	0.794196	1.59518	1.98549	1.2458	2.3164	2.69002	2.86793	0.856486	2.57765	-0.992745	2.76765	0.91638	1.32366	1.84367	1.2458	0.539269	2.95278	1.32366
9620373	Island4392	chr3:42978026-42978027	-0.177716	0.0253924	2.67211	1.37015	1.10048	0.426947	1.87211	2.67211	2.25999	1.87211	0.449886	0.41246	-0.667573	2.45393	2.29877	2.17687	2.29877	3.22968	-0.157159	1.87211	0.348299
9620375	Island4392	chr3:42978033-42978034	-0.180699	0.0282581	2.80184	0.807973	0.559847	1.49274	2.77019	2.73668	2.38233	1.86931	1.45555	1.37189	0.10307	2.06905	2.39041	2.80948	1.87325	1.99543	0.00665454	1.82899	0.918743
9620377	Island4392	chr3:42978050-42978051	-0.124762	0.261227	1.04605	1.91389	1.4893	1.09537	1.18741	2.28687	1.22275	2.30599	1.25125	-0.131935	1.54724	3.16643	1.87577	1.3111	2.66329	2.78585	-0.461772	0.692658	2.06698
9620379	Island4392	chr3:42978053-42978054	-0.153985	0.0752514	1.87197	0.710921	1.64794	0.966948	2.0506	1.80052	1.15748	2.97478	0.253199	0.55016	0.757848	2.11641	0.691506	1.93693	2.53803	1.35595	-0.152425	0.244516	1.53574
9620381	Island4392	chr3:42978060-42978061	-0.108273	0.363931	0.884374	0.305511	1.09695	0.251484	0.990187	1.17927	0.369829	1.67845	-0.840521	-0.221897	0.483623	1.42648	1.04225	1.04225	1.84915	1.84915	0.0462286	0.264164	1.32703
9620383	Island4392	chr3:42978063-42978064	-0.111528	0.342222	0.638594	1.55727	1.36406	0.94482	2.02402	1.93727	1.44415	1.31027	0.894511	0.2405	0.340366	2.70562	0.170068	0.809374	2.06533	2.70562	1.40534	1.24841	1.03749
9620385	Island4392	chr3:42978082-42978083	-0.207474	0.0140116	1.67517	2.83679	1.5756	1.4387	2.52284	1.72164	2.31563	2.45179	0.961203	1.21053	0.86518	3.06911	1.90749	2.46112	2.53563	3.10894	0.210526	1.60983	2.30576
9620387	Island4392	chr3:42978089-42978090	-0.148775	0.0326309	1.92676	1.48755	0.924854	0.32526	2.04102	1.3874	1.30104	1.80216	0.717722	0.452233	-0.279132	2.1084	1.55038	1.95518	1.98758	2.01709	0.0516417	0.32526	0.839198
10225873	Island4675	chr3:72978000-72978001	-0.0657583	0.670604	2.02677	-0.227727	0.354684	1.17294	1.25131	1.15815	0.826297	0.948004	1.28362	0.970715	0.212982	1.58088	1.60875	0.328143	0.796729	0.471341	0.370609	1.07129	0.912045
10225875	Island4675	chr3:72978007-72978008	-0.0342583	0.836186	1.32798	1.10478	0.774012	1.14599	-0.356099	0.120526	0.756026	1.31587	0.251364	1.05705	1.31587	1.70928	-1.04456	0.93476	1.13289	0.556508	0.529061	0.854638	0.676588
10225877	Island4675	chr3:72978010-72978011	-0.109108	0.0726267	1.95856	0.395186	1.50072	1.10392	0.0268296	1.12611	1.31758	1.3481	1.22601	1.95856	1.16966	1.95856	0.609122	0.30441	1.66386	0.793136	0.890255	1.04287	1.95856
10225879	Island4675	chr3:72978017-72978018	-0.1284	0.220089	2.07108	1.17239	2.17387	1.60852	0.760491	1.21712	1.98344	1.05046	1.44438	2.62615	1.12648	1.86293	1.98344	1.26931	1.78397	0.183831	0.497524	0.747444	1.51601
10225881	Island4675	chr3:72978020-72978021	-0.117134	0.00734172	1.67092	-0.121495	2.16815	1.38359	0.878458	1.30255	1.93809	1.58001	0.33003	1.28781	1.12928	2.04206	1.77174	1.23308	1.85587	1.17288	-0.346567	0.492116	1.42573
10225883	Island4675	chr3:72978049-72978050	-0.104257	0.0432936	1.51436	0.0576289	1.49522	1.16218	0.771726	0.67794	1.57561	1.82947	0.369786	1.5848	0.913588	1.47914	-0.625791	0.688566	1.02586	-0.487035	0.482329	1.83618	0.739571
10225885	Island4675	chr3:72978056-72978057	-0.174126	0.0280141	1.03167	0.272049	1.14965	1.8699	0.452317	0.0949761	1.51386	1.68701	1.38942	0.800617	1.03167	2.31895	1.10098	1.21348	2.65394	-0.83823	1.36629	0.852789	1.42775
10225887	Island4675	chr3:72978059-72978060	-0.150313	0.00777467	2.59951	1.54139	2.75037	1.92588	2.80066	1.49317	3.3921	2.16063	2.10009	1.22018	0.835555	3.28917	0.185679	0.462675	2.25842	1.18653	1.1966	0.587983	1.56501
10225889	Island4675	chr3:72978063-72978064	-0.108719	0.0747566	0.937771	-0.00731858	-0.560572	1.63351	0.735896	0.346274	1.57283	0.901875	1.63351	1.20443	-0.113653	0.966053	0.250923	1.6658	1.29978	0.681164	1.05388	-0.368857	1.15146
10225891	Island4675	chr3:72978075-72978076	-0.16877	0.021992	1.4602	0.468505	-0.669021	1.89567	1.64358	1.07011	2.69855	1.55512	2.34166	1.92796	1.25658	2.51045	0.578287	1.59595	2.03561	1.45654	0.407299	0.33935	0.774326
10225893	Island4675	chr3:72978079-72978080	-0.156935	0.0287779	1.64974	0.133686	0.210605	1.11149	1.64974	0.99667	2.28584	1.50694	1.64974	2.61013	0.526736	2.31614	0.377526	1.27355	2.53827	0.716783	1.2476	1.5831	0.872276
10225895	Island4675	chr3:72978083-72978084	-0.178738	0.0105719	1.14221	-0.0790567	0.271772	1.92411	1.16121	0.680709	2.30593	1.10564	1.86815	2.30593	0.309952	1.26062	1.16817	1.20585	1.32138	1.05032	0.492277	0.880917	2.40558
10225897	Island4675	chr3:72978101-72978102	-0.0984682	0.181735	2.36624	0.404351	-0.442587	2.11026	0.910161	1.7664	2.77154	1.82329	1.55564	0.677488	1.03187	1.42536	0.313305	1.55564	2.14333	-0.997755	0.792908	2.37891	-0.655092
10225899	Island4675	chr3:72978115-72978116	-0.149512	0.00523697	1.91325	1.29936	1.76073	0.859452	1.19146	1.52675	2.86348	1.41667	2.63742	1.53089	0.36129	1.38379	1.43976	0.990377	2.40084	1.41667	1.47555	1.79965	2.41135
10225901	Island4675	chr3:72978117-72978118	-0.14359	0.0147308	3.86951	-0.231611	0.741439	2.84037	0.947203	3.7017	3.28925	2.05671	1.75288	2.25821	1.88224	2.49706	1.28988	1.36317	4.25885	0.741439	1.96779	3.39521	2.68115
10225903	Island4675	chr3:72978123-72978124	-0.179012	0.0142318	3.08446	2.16053	0.713659	2.86905	1.0793	1.22528	3.40475	1.66978	0.861313	1.576	2.50256	2.87925	1.91321	2.19557	2.99135	-0.0611708	1.34802	2.18558	1.81983
10225905	Island4675	chr3:72978129-72978130	-0.138948	0.00790844	2.51308	0.919973	-1.0407	1.26258	0.96665	2.86692	2.59663	2.08431	3.43209	2.54568	1.73917	2.89501	1.00569	2.39156	2.45091	0.507963	1.73331	2.92793	3.21328
10225907	Island4675	chr3:72978141-72978142	-0.119604	0.0742764	2.85011	0.0409279	-0.967569	0.285936	0.245405	1.47483	3.03525	0.768923	2.02556	1.95496	1.02498	2.30705	0.899353	-0.390502	2.37325	0.256938	0.858365	1.82159	1.47483
10225909	Island4675	chr3:72978144-72978145	-0.116165	0.0356505	1.71478	0.855969	-0.493462	1.25103	0.789341	1.84811	1.59455	1.43637	1.25103	1.41564	1.27572	1.92867	-0.223398	0.981413	2.08146	1.04253	1.05879	1.4856	1.17886
10225911	Island4675	chr3:72978147-72978148	-0.128646	0.0105719	1.94214	0.238225	0.801302	1.63228	0.13991	1.59497	2.54636	1.90719	1.25919	0	1.37112	1.99791	1.66067	1.31708	2.12759	1.46905	1.76286	2.58197	2.48609
10225913	Island4675	chr3:72978155-72978156	-0.110926	0.0919419	2.60097	-0.139633	0.840539	-0.222211	0.0555529	2.09652	2.04157	1.05859	0.445924	0.958287	2.29332	0.712087	0.958287	0.864901	1.82261	1.49993	2.23574	-0.357126	1.2592
10225915	Island4675	chr3:72978158-72978159	-0.140668	0.0153184	3.00833	1.12585	2.05607	0.857939	0.490864	1.4593	2.80178	1.92472	1.00025	0.404863	1.48847	1.87547	1.61635	2.00625	2.07195	2.21087	1.98003	1.45081	2.37991
10225917	Island4675	chr3:72978160-72978161	-0.144822	0.0147308	2.74776	1.47095	2.42813	0.603865	0.232256	2.17109	2.15024	1.60134	1.66152	0.732499	1.43606	1.16128	1.52481	0.41806	1.93217	1.09646	1.38326	3.01932	2.02623
10225919	Island4675	chr3:72978169-72978170	-0.100939	0.0737416	2.08244	0.301999	0.696889	0.02777	-0.849763	2.13896	1.94737	1.81026	0.52272	0.919014	1.38795	1.19948	1.26776	0.507671	1.66731	1.6183	0.967302	1.58877	2.00222
10225921	Island4675	chr3:72978172-72978173	-0.117946	0.0218155	2.16816	1.06053	-0.170854	0.3681	-0.670759	1.81105	1.75699	1.46052	2.19521	0.646804	1.42978	1.86854	1.70606	0.264773	1.2253	1.39312	0.989229	0.851349	2.61596
10225923	Island4675	chr3:72978186-72978187	-0.107407	0.0215347	1.72727	-0.187456	0.128541	1.50634	1.03879	1.06721	1.58774	1.13605	1.79039	1.656	0.186149	2.577	1.2102	0.990838	1.37121	0.128541	1.12605	1.95311	1.89297
10225925	Island4675	chr3:72978189-72978190	-0.12148	0.0210271	1.66375	0.526721	2.74557	0.458649	1.13163	1.79115	0.96819	2.19624	0.337788	2.22121	0.842166	2.4517	1.62194	1.28676	0.853943	0.44519	1.50688	2.59901	2.65705
10225927	Island4675	chr3:72978192-72978193	-0.172038	0.000816966	2.71888	1.44276	3.24905	1.80898	0.308263	1.94873	2.82125	1.2349	2.5899	1.56761	1.51223	2.33052	1.53805	1.07882	2.2515	0.410303	2.00153	2.43039	3.05845
10225929	Island4675	chr3:72978197-72978198	-0.151111	0.00519809	2.67623	-0.0714455	0.332624	0.451339	0.556349	2.10905	1.92804	2.25537	1.42444	1.58795	1.49985	3.42442	1.10502	1.59074	1.55394	0.17823	1.42287	1.46042	2.47818
10225931	Island4675	chr3:72978201-72978202	-0.123221	0.0120895	2.47059	0.14714	0.252556	1.99652	1.6837	0.888621	1.70099	1.81622	0.642869	0.912715	1.12353	2.53179	0.436516	0.800279	1.65479	0.876389	1.69498	0.919201	1.58733
10225933	Island4675	chr3:72978203-72978204	-0.146891	0.00967168	1.9157	0.166836	-0.208799	0.782632	1.00924	0.885638	1.81609	1.83476	1.19466	1.39915	1.07877	2.12171	0.547468	1.37703	1.94632	1.32302	1.27835	1.67601	2.4489
10225935	Island4675	chr3:72978212-72978213	-0.165388	0.00515839	3.51204	0.775438	1.3836	1.48873	0.0860612	2.31391	3.57196	1.43306	1.99853	1.88498	3.12498	3.50962	1.88198	1.42188	2.81532	0.817581	1.78381	0.943363	3.18857
10225937	Island4675	chr3:72978220-72978221	-0.132018	0.00748422	2.3306	-0.0226974	0.00241302	0.598976	1.62795	1.46153	2.34732	1.95091	1.02277	1.06665	1.67299	1.60948	2.0874	1.297	1.62795	0.337219	1.67154	2.27636	1.77688
10225939	Island4675	chr3:72978249-72978250	-0.120673	0.0253924	1.85706	-0.153909	0.395628	1.06781	0.495928	1.37758	1.57721	1.40872	0.963443	1.84595	1.07368	1.91483	2.19035	1.57044	1.34502	-0.259772	1.33664	1.01941	-0.259772
10225941	Island4675	chr3:72978259-72978260	-0.111269	0.00206953	2.03814	0.562092	1.50366	1.24759	1.12263	1.89285	2.04379	0.922307	1.7088	1.2281	1.36318	2.51133	1.99804	1.71437	1.47325	0.883891	1.21616	2.29135	1.95915
10225943	Island4675	chr3:72978282-72978283	-0.0271719	0.419907	1.47222	-0.0264264	-3.97907	-1.18955	0.756203	-0.850973	-0.400508	0.756203	0.953719	-0.126034	1.39442	1.63844	-0.234063	0.462124	0.836406	0.558997	0.281882	1.24966	0.462124
10225945	Island4675	chr3:72978291-72978292	-0.112991	0.0499168	1.76186	0.855794	-1.57294	0.318694	0.695333	0.877444	1.34532	1.16114	1.06894	0.203131	0.993332	2.07421	0.531725	1.17672	1.50419	0.0496666	0.870076	1.86642	-0.0375855
10225947	Island4675	chr3:72978322-72978323	-0.0828308	0.0822687	1.45181	0.190616	-0.861412	-1.07496	1.06419	0.00630302	1.36546	1.47488	1.2212	0.481775	1.61229	2.15622	-0.230584	1.00673	1.91465	-0.0568732	1.73877	1.46194	1.27524
10225949	Island4675	chr3:72978324-72978325	-0.0667345	0.180235	2.94684	-1.01674	2.87132	-1.74875	0.092554	0.291726	3.09384	-0.820018	0.39536	0.998932	1.90794	3.86564	2.74921	1.68978	1.66857	0.747715	1.13197	2.06276	1.71669
10602415	Open Sea	chr3:105601367-105601368	-0.279591	0.00326356	-0.351089	2.18661	2.46966	0.652606	0.260574	0.752513	0.506281	2.32319	0.580798	2.83761	2.84395	4.12516	4.30455	2.85172	3.70743	3.81215	2.61722	3.82811	2.41102
10687131	Open Sea	chr3:112012966-112012967	-0.212515	0.012156	0.942583	0.992192	0.548013	3.07364	1.36827	0.714078	1.33384	0.785486	1.24024	1.28534	1.49434	3.98785	2.35646	2.0619	2.01982	4.26406	3.33352	3.36637	2.23243
10687135	Open Sea	chr3:112013063-112013064	-0.205305	0.0114768	0.0287902	0.597317	0.196018	1.84257	0.622167	1.48363	0.74331	2.09101	0.614191	0.952516	1.87398	3.72435	2.58956	1.63784	2.11896	2.39534	3.06552	2.09968	2.76386
10687137	Open Sea	chr3:112013079-112013080	-0.205436	0.0140118	-0.318043	2.19152	2.342	1.84366	0.0252989	0.184272	1.14194	1.92562	0.974008	0.177092	2.02835	4.36186	2.99329	1.8987	3.15393	3.67958	3.36631	2.03271	3.00319
10687139	Open Sea	chr3:112013130-112013131	-0.21591	0.00971258	0.425723	1.38984	0.853952	0.867043	0.464487	0.660604	1.31177	1.12917	1.02931	2.14976	1.10631	4.09844	2.81626	2.23871	2.83116	3.03389	2.67572	3.64834	2.47727
11230923	Open Sea	chr3:142666103-142666104	-0.204722	0.0491253	0.453657	2.38236	1.04989	0.179711	1.46734	0.785426	-0.305582	2.62291	1.02739	0.397257	0.886734	2.19695	3.06219	2.24639	3.13833	3.44289	2.83005	2.42768	-0.617955
11230929	Open Sea	chr3:142666116-142666117	-0.204662	0.0249287	0.596516	1.59866	1.5734	0.453353	1.5414	1.81341	0.283345	2.34561	1.52197	1.30339	0.933373	3.7648	3.71749	1.74183	3.62682	3.17347	2.65037	1.18569	0.647646
11419113	Open Sea	chr3:156323893-156323894	-0.201585	0.0461824	1.47093	2.17478	2.6054	-0.0188743	2.34575	2.24604	-0.669123	1.24328	-1.05696	1.08937	-0.602377	3.44392	2.00212	3.7928	2.73622	2.1286	2.65354	1.92308	3.83147
11572831	Open Sea	chr3:168866705-168866706	-0.212655	0.0010311	3.47204	1.52757	1.53428	1.32923	0.809761	2.72066	0.921919	4.09819	0.88397	0.100486	1.06138	3.1214	0.762536	0.88397	2.88764	0.783787	1.42311	2.21975	2.59544
12013937	Island5240	chr3:194014514-194014515	-0.175586	0.0694191	0.994399	1.34244	2.77641	1.76195	1.76195	2.55902	-0.839024	1.23057	1.76195	0.566341	0.542898	-0.12204	0.876314	3.03727	2.14151	1.03734	0.847277	0.167805	1.07875
12013939	Island5240	chr3:194014523-194014524	-0.152856	0.254681	0.944321	-0.283722	1.88079	1.18013	0.0171406	1.91735	-0.812826	0.944321	2.18543	-0.746688	0.509933	0.966886	0.774485	1.88079	2.18543	-0.251655	0.888271	2.18543	1.29183
12013941	Island5240	chr3:194014525-194014526	-0.158226	0.115507	1.7293	0.316302	1.03197	0.222583	0.375211	2.00324	-0.499307	0.420434	2.00324	1.55808	0.420434	1.40969	0.878616	1.67949	1.35573	0.578715	0.759608	1.40969	1.05356
12013943	Island5240	chr3:194014530-194014531	-0.185845	0.255317	1.88302	0.379277	0.84226	0.869451	-0.113312	2.24532	-0.296825	1.02041	2.35476	0.53836	0.313545	1.70331	0.441549	2.46136	1.32428	0.471473	1.27987	2.74563	1.91177
12013945	Island5240	chr3:194014564-194014565	-0.200776	0.0213252	2.22998	1.29734	1.11294	2.64966	0.170414	3.24468	-0.505744	1.48806	1.78279	0.996829	0.485954	1.63542	-0.0549722	3.20288	1.80959	1.25227	0.797269	2.91261	2.01858
12013955	Island5240	chr3:194014686-194014687	-0.142207	0.31606	2.61057	1.53837	3.41472	1.3852	1.09688	2.031	0.723501	2.35829	1.85373	-0.725159	0.186469	1.65751	1.89577	1.91883	1.89577	0.661119	0.644873	0.0372939	0.772516
12013957	Island5240	chr3:194014703-194014704	-0.144506	0.0920826	3.5134	2.52666	4.04547	2.53196	-0.307807	1.86883	0.025777	1.412	0.17589	-1.0679	0.598026	1.86883	-0.415296	3.32772	2.03329	-0.345015	0.761908	0.327045	0
12013959	Island5240	chr3:194014713-194014714	-0.218845	0.0246118	2.24135	1.14077	2.26344	2.01652	0	1.72844	-0.198051	2.56523	0.35209	0.243755	0.748991	2.05041	2.11254	2.37661	1.39428	-0.243755	1.5844	0.186401	0.413323
12013961	Island5240	chr3:194014715-194014716	-0.2024	0.0386431	2.65862	2.22918	3.26212	2.2644	0.468496	1.28481	-0.293401	2.34991	1.66576	0.335466	1.44808	2.7926	2.46394	2.2644	1.76154	-1.07085	1.2432	-0.587916	-0.130138
12013963	Island5240	chr3:194014717-194014718	-0.212503	0.0933124	2.15267	1.70111	1.26627	2.17953	0.890229	1.74976	0.0306975	3.03906	0.311698	0.202604	1.89941	2.20481	1.8572	2.81746	2.59586	-1.01302	1.76265	0.119179	0.202604
12013965	Island5240	chr3:194014722-194014723	-0.210784	0.132777	2.04822	1.60685	2.24789	1.93931	0.987122	2.30866	-0.0397499	2.56166	0.730404	0.58398	2.4896	3.24624	1.28585	2.57236	2.07267	1.1925	1.97775	0.21967	1.03452
12013967	Island5240	chr3:194014736-194014737	-0.196545	0.0104366	2.54495	1.37082	4.18933	3.09673	0.481714	3.08596	0.949665	2.55407	1.20491	0.0137633	1.09744	4.08769	2.55407	3.24688	1.92377	0.949665	1.93236	1.51121	1.51121
12013969	Island5240	chr3:194014741-194014742	-0.234775	0.155611	2.52424	1.49336	3.30629	2.278	0.246669	1.98233	0.325272	2.71424	1.54982	0.80999	0.748299	3.96066	1.99755	3.19081	1.59379	-0.838053	1.85337	0.0344405	0.688811
12013971	Island5240	chr3:194014743-194014744	-0.196724	0.0169405	4.16089	1.23547	5.93544	2.73301	-0.318733	1.90414	0.105897	3.26691	1.6138	-0.433217	1.29965	2.67311	2.74877	5.88665	2.6884	1.23547	1.41517	1.95429	1.10711
12013973	Island5240	chr3:194014745-194014746	-0.2519	0.00777467	2.88339	1.69696	2.51322	2.12657	1.09028	1.74442	1.03675	2.9391	1.80437	-0.63521	0.676637	3.26669	1.15995	2.86305	2.04431	0.880702	1.799	0.239355	0.895278
12013975	Island5240	chr3:194014772-194014773	-0.204474	0.029426	2.36336	1.54006	3.03404	2.20367	-0.0798431	2.75725	0.997041	4.0374	2.33053	-0.519938	0.105507	1.18168	1.25119	3.92102	2.00422	0	1.60953	0.466452	0.481424
12013977	Island5240	chr3:194014777-194014778	-0.223166	0.132443	2.62023	1.38705	2.23611	2.01989	1.00393	1.05211	-0.578695	2.64786	1.06064	1.03266	1.17722	3.159	0.944068	2.51595	2.61656	0.0921723	1.80751	0.501082	1.68238
12013979	Island5240	chr3:194014791-194014792	-0.192685	0.061373	3.1182	2.04104	3.62091	2.47638	-0.116696	2.31956	-0.116696	3.05887	1.04174	0.211164	0.0727344	2.89458	2.11661	3.55944	1.95068	-0.411771	1.2159	-0.313413	0.0979035
12013981	Island5240	chr3:194014797-194014798	-0.217201	0.0337442	2.15238	1.6047	2.52653	1.98425	-0.559188	1.979	-0.309704	2.16477	1.04464	0.192363	0.513391	1.56554	0.897882	2.58906	2.35146	0.331826	1.5735	0.0110609	0.62343
12013983	Island5240	chr3:194014814-194014815	-0.207701	0.0548693	2.68262	1.54251	3.06122	2.34729	0.294682	1.79499	0.597047	3.08182	1.00598	-1.06986	-0.670656	3.2415	1.99224	3.52094	2.68262	-0.484362	1.74484	-0.111776	-0.111776
12013985	Island5240	chr3:194014819-194014820	-0.248545	0.0118204	3.66561	2.34926	3.54961	3.23409	-0.0788803	2.52417	0.335241	3.15521	2.54568	0.73246	0.448184	3.09887	2.02131	3.19107	2.81225	-1.22472	2.10132	0.788803	1.07052
12013987	Island5240	chr3:194014823-194014824	-0.209575	0.0221758	3.24306	1.60066	3.01652	2.18588	0.435615	1.77057	0.141242	3.54113	2.14435	-1.18038	0.751149	3.37251	2.30455	1.55069	2.37905	-0.721341	1.83184	-0.208302	1.59257
12013989	Island5240	chr3:194014858-194014859	-0.193665	0.226275	3.36172	1.58611	4.72212	2.99673	-0.166485	3.56611	0.285403	4.24537	1.81052	-0.249727	0.394731	5.84362	-0.166485	0.0312159	1.97998	0.624319	1.41512	1.41512	1.64107
12106797	Shore	chr3:196694832-196694833	-0.206599	0.0187066	1.39913	1.37328	1.59527	2.22546	0.924423	2.04805	1.65626	1.70505	-0.949075	1.7743	-0.539247	1.57494	1.57494	1.23161	2.57901	1.32361	2.09783	1.9002	2.15699
12106799	Shore	chr3:196694856-196694857	-0.22335	0.0225852	1.23295	0.293404	1.77759	2.19544	0.902156	2.30986	0.73295	1.49147	-0.50337	1.82486	1.92447	0.404827	0.882949	1.81863	1.75248	1.34232	1.51603	2.67044	0.522014
12406155	Open Sea	chr4:6789991-6789992	-0.20044	0.0246118	1.06623	3.71368	3.69117	0.95067	0.986228	0.824601	0.107739	2.24498	-0.922669	-0.613877	1.00845	2.67909	1.15291	1.13557	-0.328587	2.1063	0.719544	1.5196	1.87518
12550449	Open Sea	chr4:11531354-11531355	0.409359	0.0122921	-0.110693	-2.25354	-2.25354	-0.311139	-2.25354	-0.303361	-2.25354	-2.20126	-2.25354	-2.25354	0.241638	-0.253832	-2.25354	-2.25354	-2.25354	-0.335726	-0.00883307	-2.25354	0.255896
13064667	Open Sea	chr4:46726006-46726007	-0.236585	0.0405203	-0.433222	1.20984	0.451481	1.6685	1.23278	1.78953	-0.145323	1.64955	-0.0743917	2.29788	1.84602	2.75781	1.8319	1.89918	2.55497	1.08253	1.45064	2.21315	1.28119
13064675	Open Sea	chr4:46726145-46726146	-0.253973	0.0322262	-0.989203	2.57857	1.85553	1.63326	2.23807	0.100222	0.672313	1.12522	1.12522	3.13987	2.30277	4.37104	1.77438	4.2783	3.95794	1.63326	2.83355	2.18749	2.7945
14711675	Open Sea	chr4:170695882-170695883	-0.246176	0.0198252	0.504716	1.4066	1.07914	-0.776695	-0.066981	0.0888523	0.334905	2.45394	0.757943	2.83312	3.52938	4.11736	3.20552	3.30537	3.41915	3.46068	2.7245	0.909028	3.01414
14711677	Open Sea	chr4:170695907-170695908	-0.226411	0.0165041	0.367415	2.34124	2.14198	-0.757028	0.0688903	0.702552	0.694566	2.21827	0.6463	2.56995	3.65119	4.04922	3.11944	2.34438	4.32287	2.43135	3.76314	3.88574	5.308
14711751	Open Sea	chr4:170696439-170696440	-0.216481	0.00376626	1.05187	1.85436	1.35952	0.0927625	1.72786	2.29712	1.12512	3.31648	3.20275	2.65937	2.77291	4.5286	2.99013	5.36235	3.13264	3.25897	3.75989	3.38388	4.28952
14711765	Open Sea	chr4:170696547-170696548	-0.207449	0.0296583	-0.407718	0.897485	-2.12443	-0.235524	1.20599	0.879073	0.55042	3.08536	1.96538	0.50916	2.36584	2.61798	3.58775	3.47138	3.40848	2.4739	2.76206	3.33838	3.56722
15339093	Open Sea	chr5:8457327-8457328	-0.213261	0.0365402	-1.26098	-1.13541	2.80138	0.768854	2.46877	4.35282	1.67731	0.654126	1.12161	2.23301	1.93849	2.72203	2.59913	4.35971	1.05545	3.13992	3.75662	2.31434	5.64726
15339095	Open Sea	chr5:8457356-8457357	-0.227564	0.0300224	-0.912179	-0.59537	1.37943	1.27117	2.00133	4.64642	0.965206	0.502905	0.825337	2.14749	2.98791	3.61151	3.66155	3.48283	1.16951	3.1442	3.8613	3.08071	5.41301
15715207	Open Sea	chr5:33363063-33363064	-0.214272	0.00267487	3.39318	3.40151	3.42605	2.63811	2.16287	2.94347	1.49606	3.5651	1.24979	0.930505	-1.88174	2.34971	0.98639	-0.42937	1.24979	0.27851	0.366995	-0.273982	1.52573
17232035	Open Sea	chr5:138868099-138868100	-0.205807	0.0142408	1.29987	4.69923	4.26334	1.17481	1.42236	1.17125	0.498351	3.32406	-0.0782449	0.737751	1.14544	2.92098	1.29204	1.09489	0.84809	1.18005	0.911016	0.0243624	2.8531
18669719	Open Sea	chr6:26522639-26522640	-0.212763	0.0428498	0	1.26908	-2.44569	0.047753	2.66939	2.05989	0.214216	-0.567273	0.231385	8.01206	5.97812	8.38065	6.30695	7.42196	6.71397	6.52679	5.87407	3.85254	4.90423
18702679	Open Sea	chr6:27706181-27706182	-0.254592	0.0441143	0.150761	0.973665	-1.06675	1.83697	1.8914	0.27858	-0.286825	-0.286825	0.393113	2.4373	5.57527	4.94161	6.32739	2.21954	4.39719	6.35709	5.12569	5.95943	3.58057
18702683	Open Sea	chr6:27706198-27706199	-0.220157	0.0438287	0.900194	1.77247	0.15591	1.16425	2.16292	-0.53262	0.0475344	-0.00703702	1.41104	2.2232	4.88613	5.33284	6.93232	2.49833	4.9231	6.32792	3.27533	5.01472	3.43047
18702685	Open Sea	chr6:27706214-27706215	-0.241402	0.0499168	0.194882	1.16622	-0.279713	1.1968	2.20174	-0.629165	-0.130469	-0.230495	1.53664	1.87647	5.31187	4.08997	5.86503	2.00922	3.61811	5.01992	3.41421	5.71806	3.87299
18702687	Open Sea	chr6:27706221-27706222	-0.26569	0.0407164	0.428605	0.656587	0.581679	1.60381	1.90194	-0.331823	0	0.0389641	1.46043	2.0954	5.58774	4.23843	6.14334	1.93926	3.87608	4.95277	3.7906	5.73958	4.90948
18702693	Open Sea	chr6:27706251-27706252	-0.269759	0.0392247	-0.764319	0.754392	0.17267	0.722323	2.73699	0.246861	0.0474732	0.545942	3.14463	1.00453	5.30823	4.36753	6.36652	2.94081	4.30985	5.43093	3.75608	5.70509	4.21467
18702695	Open Sea	chr6:27706262-27706263	-0.265689	0.0447177	-0.463603	1.27862	0.617514	1.13419	2.68542	-0.17091	0.00438795	0.601754	2.78854	2.53985	5.32521	3.88463	5.0946	2.88249	4.14143	3.6341	3.33999	5.60706	3.84549
18702697	Open Sea	chr6:27706275-27706276	-0.300175	0.0223739	0.309603	0.973039	0.659155	1.03201	2.47683	-0.451853	-0.0325898	0.309603	3.34372	2.18786	5.36646	3.79601	5.84806	2.59397	4.33445	4.88485	3.22414	6.30134	4.49957
19091241	Open Sea	chr6:42883798-42883799	0.202697	0.0305357	-1.89166	-4.19628	-4.58637	-2.50366	-1.16838	-2.41712	-1.4863	-2.40095	-0.945828	-0.945828	-0.189166	-1.33721	-3.35339	0.315276	-1.3662	0.773859	-0.574915	-0.945828	-0.072756
19152401	Open Sea	chr6:45294926-45294927	-0.203124	0.000214026	2.76076	0.894948	1.7916	1.76267	0.704998	3.15465	0.0754297	3.17996	1.94674	0.661003	-0.807129	2.84484	-0.00893247	0.218063	0.458304	0.952797	1.30914	0.682838	1.12996
19152403	Open Sea	chr6:45294931-45294932	-0.213247	0.000680237	2.22252	2.11644	3.33891	0.842613	1.11297	2.81126	0.401723	3.53674	1.11297	-0.156118	-0.764614	3.15027	0.576958	0.599292	0.424741	2.06948	1.70219	0.907499	1.39316
20073159	Open Sea	chr6:116886155-116886156	-0.283292	0.0188681	1.3975	1.92279	2.19491	0.954893	-0.569461	-0.304307	1.0948	3.40978	2.21539	4.50514	1.64204	3.00887	2.05669	5.77017	2.69485	5.48452	3.71814	4.8292	0.888118
20073163	Open Sea	chr6:116886173-116886174	-0.283028	0.01712	1.43648	2.17716	2.51384	0.602394	-1.67589	-0.234527	0.425081	2.51384	2.51384	3.28338	2.21457	4.49845	3.46445	6.24316	2.18403	7.00283	5.20724	7.26689	3.98296
20508907	Open Sea	chr6:147523200-147523201	-0.234729	0.0071943	1.4194	1.88505	1.80501	-0.618862	0.798489	2.75725	-0.0874737	2.95533	-0.400713	3.9259	5.33983	7.39645	5.26541	2.65337	5.23884	4.22889	4.56217	4.88995	2.76905
20508909	Open Sea	chr6:147523223-147523224	-0.288066	0.00139426	2.23394	2.67111	1.99486	0.383591	0.370005	2.70688	0.282513	2.00053	-0.124958	5.43323	6.61745	4.78409	3.72268	2.99898	3.76403	4.78409	5.15503	5.51914	5.29413
20508911	Open Sea	chr6:147523242-147523243	-0.28634	0.000439009	2.90674	2.02503	2.89658	0.985868	1.04949	3.16606	0.266451	1.90956	1.03105	4.4315	5.37343	5.66208	3.76632	4.39334	4.06688	4.10334	4.9027	4.90785	3.36982
21111795	Open Sea	chr7:971105-971106	-0.281717	0.0176942	2.38791	3.80442	3.70712	1.75882	2.26354	-0.261239	1.54631	3.08845	1.49097	0.958852	0.743978	2.77168	1.26266	1.476	1.53509	1.41664	2.40212	2.49451	1.69218
21459127	Open Sea	chr7:12726036-12726037	-0.205892	0.0120895	-0.881476	2.09671	-0.424898	0.350891	0.606731	4.30571	-0.907936	1.62799	1.9829	4.54984	2.93165	5.38785	4.99503	4.34976	4.30395	3.63043	4.16698	4.72792	5.81361
21914831	Open Sea	chr7:39873558-39873559	-0.205623	0.0471026	-0.378772	-0.112967	0.351005	2.76256	0.824873	1.08359	0.961147	1.78403	-0.365657	3.19536	1.62189	2.42879	2.50582	2.10375	3.66116	3.49329	2.95578	2.84156	1.61477
21914835	Open Sea	chr7:39873565-39873566	-0.242823	0.00876826	-0.0401469	0.714486	1.90688	2.8497	1.81925	1.34997	0.25694	2.07018	0.393401	3.5188	2.50924	2.13446	3.33584	3.16398	4.28112	4.57821	3.61793	2.1583	3.60592
22051941	Island9449	chr7:47092245-47092246	-0.286019	0.0226705	2.55446	-0.673857	0.571401	-0.0693055	0.347601	0.0502911	1.26864	0.571401	1.01301	5.45398	4.19905	5.62156	4.22022	5.73714	3.4198	5.4729	4.37601	3.94573	2.04136
22051943	Island9449	chr7:47092254-47092255	-0.285783	0.186057	2.62348	1.37786	2.64572	1.13228	0.129807	0.270593	-0.205177	0.864676	0.129807	2.44615	4.77573	4.68532	3.21626	4.69747	2.9864	5.81537	4.08263	4.5777	3.26722
22051945	Island9449	chr7:47092260-47092261	-0.300015	0.0190878	3.59318	-1.21198	0.545393	-0.746327	0.0752266	0.598863	0.406734	0.793299	0.623306	6.30232	5.73197	6.24723	4.36314	6.18112	4.63584	7.94715	5.41251	6.54472	5.31758
22051947	Island9449	chr7:47092264-47092265	-0.316683	0.139036	3.00909	1.33059	1.28747	0.028355	-0.547545	2.62197	1.39738	0.614359	0.614359	5.24071	5.92861	7.00713	4.01835	6.01658	4.59081	7.93941	5.17843	6.4744	4.31997
22051949	Island9449	chr7:47092268-47092269	-0.30087	0.01192	1.78338	-0.538072	2.47635	-0.5503	-1.19887	1.50554	0.866047	1.36265	1.00626	4.55526	5.31957	6.34042	4.4024	5.28288	4.16027	6.15157	5.37762	5.02774	3.8521
22051951	Island9449	chr7:47092290-47092291	-0.297651	0.00681331	1.30381	0.322248	0.752037	-0.120765	0.733267	0.85891	1.74884	1.40664	1.7794	5.80875	6.75186	7.8678	6.26316	7.03944	5.7276	8.76242	5.52474	5.33042	4.20798
22051953	Island9449	chr7:47092293-47092294	-0.254599	0.0457008	2.67444	-0.00817871	-0.978453	-0.438145	-0.700467	1.16677	1.38906	-0.269897	0.122681	4.8897	5.78042	7.8889	5.08764	5.28818	4.40899	8.67527	5.48472	4.32887	3.15624
22051955	Island9449	chr7:47092301-47092302	-0.232672	0.29136	1.04818	0.719235	0.750614	-0.97525	0.143586	0.123027	1.97789	0.520499	-0.260249	4.89269	6.50132	7.07878	4.68113	5.96031	5.02653	9.18949	4.45547	5.74812	2.45675
22051957	Island9449	chr7:47092303-47092304	-0.262178	0.311625	1.81059	0.21636	1.12735	-1.44795	0	-0.177022	0.973619	-0.21636	1.42298	4.24852	4.16174	6.16625	3.56994	5.41427	4.41109	7.06775	5.68383	4.40245	1.77542
22051959	Island9449	chr7:47092308-47092309	-0.306815	0.0209889	1.77489	0.157875	2.44969	-1.59629	1.05431	0.985187	1.08945	-0.242588	0	4.12579	5.46667	6.58269	3.68374	5.80189	3.35045	6.64438	4.97565	4.91699	3.33704
22051961	Island9449	chr7:47092314-47092315	-0.258324	0.0139434	1.78805	-0.0716977	1.76718	-0.0463119	0.690694	0.213315	0.23345	0.466285	1.71292	5.29422	5.2623	5.47509	5.31781	5.47509	3.913	7.54222	4.66592	5.14623	2.89118
22051963	Island9449	chr7:47092316-47092317	-0.243893	0.0459318	2.31439	0.103309	0.879182	-0.959299	0.49384	1.6629	-0.368961	0.325554	1.2467	3.48377	5.25106	5.92798	4.24641	5.53442	3.89299	7.10865	4.20616	4.24641	3.7634
22051965	Island9449	chr7:47092327-47092328	-0.24405	0.092912	1.44838	-1.03016	0.430059	-1.42262	0.24402	0.328045	1.54284	0.16373	0.377838	5.92774	6.72971	6.77967	5.73054	5.36499	4.0012	6.9795	6.05635	2.45201	4.43851
22051967	Island9449	chr7:47092334-47092335	-0.258601	0.0304773	0.60478	0.610363	0.353564	-0.0897592	0.49592	0.205411	1.32395	-0.346797	0.331719	4.46873	6.43061	6.98796	3.81477	5.56002	3.66011	6.55323	6.54774	4.75724	1.90738
22051969	Island9449	chr7:47092339-47092340	-0.320807	0.0143385	1.48536	0.209551	-0.72682	-0.27164	0.590654	0.317819	1.43234	0.684533	1.50877	5.40641	5.97273	6.22925	4.86507	5.97273	3.60195	6.78891	6.14399	5.9261	3.00483
22051971	Island9449	chr7:47092345-47092346	-0.313311	0.012156	3.08247	0.142027	0.321199	-0.919373	0.321199	0.477974	1.59191	1.30311	1.11933	5.96512	6.50146	8.05546	6.35706	7.22697	3.91833	7.60414	5.89276	5.96512	3.32469
22051973	Island9449	chr7:47092357-47092358	-0.28408	0.0147308	2.99311	-1.06859	-0.38858	-1.32117	0.0613547	0.995143	1.6435	1.45717	1.6219	7.5773	7.88141	9.18602	7.04995	9.59874	7.88141	9.66592	7.33233	5.24583	3.2518
22051975	Island9449	chr7:47092367-47092368	-0.300811	0.0129581	1.7153	-0.390778	0.725442	-1.20351	0.327086	0.846156	1.53698	0.741238	1.52494	6.40886	6.40132	7.56163	5.91229	6.28581	5.1083	6.33793	5.19698	4.9014	5.02232
22051977	Island9449	chr7:47092372-47092373	-0.306961	0.0100356	3.04565	-0.905669	-0.273632	-0.612936	1.64909	2.1015	1.74825	-0.789965	2.5539	7.66171	7.37956	8.88758	8.06145	7.84801	7.36071	9.43047	7.13748	7.36071	3.68492
22051979	Island9449	chr7:47092384-47092385	-0.299408	0.0283823	1.02328	0.442599	0.405911	-2.13291	0.992921	0.843046	1.52533	-0.0266225	1.2001	9.47788	9.59089	10.9721	11.0559	9.43257	6.98042	10.3851	8.3442	8.03704	2.75395
22051981	Island9449	chr7:47092399-47092400	-0.2858	0.0348832	2.55781	-0.55959	-0.412439	-1.4	0.164719	3.1162	1.83989	-0.617501	-0.238688	7.37059	7.93784	10.6861	11.1388	9.10169	7.20042	9.10169	8.65139	7.58331	4.7116
22051983	Island9449	chr7:47092403-47092404	-0.288751	0.0180697	3.00728	-0.0588327	-0.254981	-1.79891	-1.10653	2.98786	0.0876694	-1.02213	-0.302956	10.2665	10.6145	12.1847	12.8756	10.375	8.62562	11.6613	7.186	8.94517	5.31393
22051985	Island9449	chr7:47092414-47092415	-0.239641	0.0531261	2.00112	-0.400513	0.678347	-1.25494	1.02645	-0.126517	0.50876	-0.524177	1.47577	7.50732	7.86117	8.27206	10.2317	9.28351	8.62837	8.71457	7.12892	8.27206	5.21729
22051987	Island9449	chr7:47092417-47092418	-0.270438	0.201358	1.7133	-0.751909	-0.333056	-0.646041	0.684829	1.86526	0.954076	0.150294	0.404363	5.67206	6.94966	6.86595	8.06741	6.50592	6.63994	7.9517	5.13693	5.79959	3.02974
22051989	Island9449	chr7:47092460-47092461	-0.309086	0.00876826	1.58761	1.63772	0.572441	-0.790665	0.059782	2.49678	1.70675	0.353257	0.842383	7.75565	8.43446	9.39698	9.17734	8.56358	7.66326	8.54326	7.32329	9.60411	3.41029
22051991	Island9449	chr7:47092471-47092472	-0.268014	0.0283818	0.658414	0.869752	0.468536	-1.06082	-0.604684	0.844902	1.28045	0.946872	0.211225	5.37921	6.24492	6.93316	7.98535	7.53741	6.54581	4.17957	6.79762	6.75921	3.11435
22051993	Island9449	chr7:47092484-47092485	-0.265254	0.0251311	1.25756	0.324568	0.711077	-1.26661	0.678803	1.17381	0.988368	1.46841	1.21594	6.09689	5.81247	5.54439	6.89034	6.67285	5.82122	6.10082	5.42879	6.22983	2.5462
22051995	Island9449	chr7:47092486-47092487	-0.268462	0.0121292	1.64399	1.08887	1.65013	-1.51963	0.41937	2.1046	0.449025	1.03948	1.01221	6.02727	8.15859	8.48192	11.9122	7.85845	8.63973	7.82679	7.769	8.58397	3.70322
22051997	Island9449	chr7:47092492-47092493	-0.296354	0.0144488	1.64569	1.15813	1.08436	-1.44258	0.751182	1.10458	0.710603	0.207048	-0.448802	7.09768	6.60424	5.91699	7.12143	6.58772	4.92092	6.07285	6.62157	6.18557	3.85852
22051999	Island9449	chr7:47092501-47092502	-0.305688	0.00388802	1.55396	1.02211	2.75854	-1.30467	0.284522	1.63865	1.795	0.125359	1.30446	6.33271	6.67832	6.42339	7.86835	6.85813	6.17401	6.37543	6.27099	7.31542	4.26593
22052001	Island9449	chr7:47092505-47092506	-0.295456	0.00563985	1.72985	0.713671	3.39757	-1.23449	1.8482	1.87243	1.58419	0.716521	1.16177	7.81367	6.90002	6.74287	8.48369	7.8833	7.34427	7.17005	6.87445	5.47044	3.97446
22052003	Island9449	chr7:47092507-47092508	-0.277795	0.0142318	1.16236	0.710302	2.25309	-1.31878	0.686099	1.11407	2.4897	0.706309	0.661296	6.35678	6.60451	7.4217	9.37134	7.80561	7.39354	6.61891	6.38955	6.25193	3.57815
22052005	Island9449	chr7:47092513-47092514	-0.276768	0.0533219	1.11259	0.332611	1.38872	-1.74812	-0.143099	1.5718	1.5006	0.636525	-0.417461	5.66554	6.80173	6.26413	9.88281	6.26046	5.99388	6.93283	5.74558	8.15788	2.35204
22052009	Island9449	chr7:47092527-47092528	-0.199227	0.557086	0.199613	0.942619	1.19457	-1.13114	0.429054	1.75216	1.26166	1.93237	0.794207	7.17929	8.40861	8.97694	13.157	7.39341	7.86658	7.82374	9.6738	11.6557	2.02553
22052011	Island9449	chr7:47092529-47092530	-0.251786	0.619296	0.86615	0.298416	0.915966	-1.57482	0.500835	1.77816	1.3311	2.13486	-1.20385	5.74809	8.11157	9.27393	9.8959	7.65574	9.71863	9.03809	6.87469	11.8981	2.47995
22052013	Island9449	chr7:47092548-47092549	-0.286101	0.0196327	1.12931	0.968723	2.48357	-1.75067	0.924858	2.38995	1.36413	2.43814	1.67173	7.02735	7.21846	7.98628	8.28685	6.15449	7.59999	7.1119	7.65725	8.5775	1.41417
22052015	Island9449	chr7:47092553-47092554	-0.289028	0.0229965	-0.00171311	0.746018	-0.215005	-1.47406	-0.843246	1.43835	0.915829	1.29696	0.34413	8.36122	7.92116	7.81806	7.72578	6.29368	7.76211	7.69645	7.62603	10.4008	3.85158
22052017	Island9449	chr7:47092561-47092562	-0.310578	0.0157857	-0.275731	1.06498	1.55788	-1.83152	-0.00408491	2.00048	1.06892	0.772048	2.59427	5.42884	5.49404	5.6206	6.75312	4.1421	4.89966	5.50293	5.749	5.35798	2.16909
22052019	Island9449	chr7:47092567-47092568	-0.314856	0.00420307	0.466998	2.4641	1.10046	-0.470858	-0.150223	1.80431	1.46043	1.30241	1.76278	5.94361	6.87641	7.38158	7.7267	5.463	5.66674	4.7655	6.7885	6.49737	2.59578
22052021	Island9449	chr7:47092571-47092572	-0.31766	0.0041639	0.768444	2.56458	2.2064	-1.39642	0.513587	1.31782	1.78926	0.69517	1.9335	5.53964	5.34472	4.54485	5.45222	5.07697	5.25115	4.65198	5.37084	6.14067	3.61637
22052023	Island9449	chr7:47092583-47092584	-0.296632	0.121804	1.22695	3.03523	1.22695	-1.50401	-0.231821	1.08896	1.22695	0.91436	1.35148	4.57208	5.29673	4.68566	6.33267	4.36893	4.06346	5.09492	5.97646	5.40436	2.55066
22052025	Island9449	chr7:47092588-47092589	-0.245009	0.052987	0.934667	2.08578	-0.0704657	-1.73411	-0.0098386	1.50719	0.91253	1.28623	-0.30189	6.66292	6.51365	2.89924	7.48527	7.15424	5.73591	6.15306	6.09201	5.73591	3.41837
22052027	Island9449	chr7:47092591-47092592	-0.288111	0.013874	1.1729	1.00392	0.0771518	-1.27132	0.460004	1.2315	2.62936	1.08238	0.122316	7.11372	6.30076	5.75446	7.20733	6.92458	6.85192	6.49587	7.91463	5.87803	4.97502
22052029	Island9449	chr7:47092593-47092594	-0.312028	0.0045084	1.69571	0.153628	-0.0288053	-1.23796	0.183413	1.55312	2.8333	2.04025	2.41964	5.99149	7.4258	5.64122	8.77775	7.2957	7.4258	7.30501	8.91042	7.86795	3.80229
22052031	Island9449	chr7:47092600-47092601	-0.302254	0.00570534	2.16939	0.624842	0.9733	-1.61838	-0.910724	0.431453	1.92544	2.47501	-0.136718	6.87657	5.73735	6.79458	9.66423	8.46753	7.49605	7.86045	7.67364	6.87657	3.64945
22052033	Island9449	chr7:47092603-47092604	-0.267072	0.0650735	1.49178	1.64471	1.28711	-2.01521	-1.57521	0.763067	2.46006	1.61087	1.4185	3.52942	5.70646	3.4903	7.46577	6.79097	6.22863	6.55738	7.12837	5.9628	2.23605
22052035	Island9449	chr7:47092609-47092610	-0.307392	0.0041839	1.524	1.70057	0.763611	-0.533718	-0.706077	0.846284	2.04068	2.04635	1.89357	5.2116	7.1267	7.17022	8.90099	7.14665	8.25661	7.60548	6.21763	6.44273	3.20944
22052037	Island9449	chr7:47092623-47092624	-0.291428	0.0329431	1.25729	0.256506	0.704908	-2.34605	-0.433509	1.57011	2.55621	0.0540012	1.01943	5.27861	5.73762	5.47188	8.13308	6.57914	4.81094	6.65564	7.57366	4.6666	3.27566
22052039	Island9449	chr7:47092633-47092634	-0.301605	0.0382069	1.97734	1.99489	1.93133	-2.38668	0.383574	0.806973	3.03046	0.238668	1.28794	7.12113	7.33905	3.58002	8.80089	8.10478	6.15975	8.75549	7.96555	5.22872	2.44093
22052041	Island9449	chr7:47092637-47092638	-0.247867	0.0267295	1.65619	1.62966	2.2969	-1.24941	0.488898	1.62966	2.22116	0.567571	-0.679687	2.67122	5.33713	3.91118	6.12933	6.4066	4.95882	5.62232	6.98246	4.81178	3.09635
22052043	Island9449	chr7:47092639-47092640	-0.272013	0.0356808	0.571503	1.93385	2.96285	-1.08886	-0.290858	1.56391	3.42935	-0.480062	-0.189498	5.22556	5.28176	4.16896	8.04315	6.60595	3.82712	5.69825	7.56517	6.10606	3.64066
22052045	Island9449	chr7:47092646-47092647	-0.260936	0.0465007	1.33837	1.21946	1.1752	-1.09324	0.22727	0.505045	2.65148	0.631306	-0.456483	4.91408	6.22203	5.62859	6.92272	7.32315	5.60405	8.18039	6.89641	7.88018	2.65148
22052047	Island9449	chr7:47092659-47092660	-0.275972	0.0147308	1.12308	1.40683	2.2586	-1.23207	0.0416331	0.638795	2.08022	1.54859	0.441086	6.10513	8.95532	4.34591	8.58105	6.16097	5.79796	9.50068	8.48109	5.51562	2.48351
22052049	Island9449	chr7:47092661-47092662	-0.274321	0.0216562	1.48126	-0.137805	2.52744	-1.34463	0.633496	0.165326	3.08422	2.27408	0.595308	3.88327	6.7798	3.88327	7.48436	5.49245	4.50395	8.02117	6.74797	5.81429	1.7767
22052051	Island9449	chr7:47092670-47092671	-0.253364	0.0221758	1.79755	0.284536	1.61715	-1.58258	0.0852618	1.06955	1.97274	0.791395	0.466098	7.02024	5.25684	5.29909	7.04858	6.53831	4.58653	8.87378	6.67823	4.02725	5.02026
22052053	Island9449	chr7:47092673-47092674	-0.290311	0.0312375	-0.613993	0.611777	4.00972	-1.15591	0.150437	0.321003	2.00628	1.53446	1.01545	4.18716	6.54401	2.98768	6.85429	5.99512	2.9408	7.26276	5.89859	5.91719	2.86905
22052055	Island9449	chr7:47092685-47092686	-0.277833	0.719533	-0.0611143	0.897748	3.40018	-2.20012	-0.0611143	0.44218	2.88923	2.19047	1.00839	5.69774	7.08406	5.28639	8.22752	7.01404	5.42008	9.25882	6.35589	3.87915	4.49589
22052057	Island9449	chr7:47092708-47092709	-0.29377	0.0115524	2.4505	1.88046	2.91436	-2.40452	1.77913	-0.116812	1.2246	2.60094	1.07826	1.62983	7.94889	5.06184	6.63131	5.98435	6.52011	7.40096	6.33923	5.94391	5.90733
22052059	Island9449	chr7:47092723-47092724	-0.258444	0.0340261	0.98242	-0.237933	0.883274	-0.760064	0.26928	0.341939	0.597476	0.732948	0.902722	1.81965	6.03652	3.95458	4.84414	4.6154	4.77452	5.82552	4.36076	3.44309	3.56318
22052061	Island9449	chr7:47092727-47092728	-0.264049	0.0215821	1.10481	-0.338533	1.11025	-1.44592	0.820714	0.0943349	1.3889	1.04167	1.26264	3.47225	4.79802	3.71776	4.92428	3.99835	3.81458	4.57706	4.10357	3.32494	3.82114
22052063	Island9449	chr7:47092732-47092733	-0.269366	0.0178848	2.11297	2.57841	1.93071	-1.58733	1.50311	-0.531717	1.66757	2.28531	1.33431	2.35832	4.99238	3.68866	4.87895	4.95247	3.83387	4.4536	3.95816	4.2291	2.51586
22052065	Island9449	chr7:47092736-47092737	-0.286391	0.0246641	1.08793	0.344556	1.31269	-1.55579	0.166691	-0.190469	0.695179	1.5637	2.31397	2.66428	4.84968	4.17145	5.73565	4.13454	3.62639	5.68834	4.09282	4.28449	3.32035
22052067	Island9449	chr7:47092739-47092740	-0.204461	0.282424	1.2055	-1.26141	0.991374	-1.99432	0.561039	-0.0278277	0.757604	2.07102	1.17237	3.53454	3.62324	2.25865	4.24653	3.91287	3.17367	4.51022	3.16446	4.51022	1.8
22052069	Island9449	chr7:47092745-47092746	-0.251161	0.0198144	1.28322	-0.367392	0.776678	-0.841805	-0.301934	-0.0636182	-0.0333238	1.24826	1.36181	2.70978	4.19541	4.20789	3.97351	4.36693	3.21176	3.50293	3.90916	4.20789	2.23238
22052071	Island9449	chr7:47092760-47092761	-0.197986	0.286471	2.17177	0.0188625	1.5833	-2.2377	-0.119463	0.309628	0.393353	1.87433	1.23217	2.86387	4.61126	3.28171	4.26083	3.58584	4.05867	3.57117	4.03475	5.13689	3.13447
22052073	Island9449	chr7:47092766-47092767	-0.222334	0.0278428	2.21912	2.27059	2.13278	-1.3976	0.442653	-0.650188	1.41617	0.781787	2.32137	3.02855	4.45124	4.70812	5.49649	3.36446	3.81093	4.04376	4.77743	2.35672	1.80705
22052075	Island9449	chr7:47092778-47092779	-0.283033	0.00815395	2.86361	0.761574	1.11978	-1.0317	1.49258	1.21343	2.67995	1.3763	2.27099	3.01619	5.32215	3.67174	5.23677	4.57312	3.92928	5.44535	4.6673	3.39181	3.92928
22052077	Island9449	chr7:47092802-47092803	-0.20782	0.0745463	0.738665	-0.284845	0.482788	-1.0126	-0.605855	0.577557	1.00813	0.0332732	2.36988	3.21215	3.87721	2.25608	4.13951	3.84575	3.145	3.13862	3.5727	3.75015	1.36008
22052079	Island9449	chr7:47092829-47092830	-0.148758	0.112162	0.70353	-0.52895	0.757311	-1.01542	-0.0434278	0.0944721	1.74554	1.1849	-0.200968	3.03742	2.1746	1.75577	3.24078	2.23064	2.35643	2.92971	2.64237	1.45488	1.64968
22052081	Island9449	chr7:47092839-47092840	-0.121877	0.447864	0.768494	-0.504215	-0.330744	-2.4527	1.98102	-0.596261	1.12144	1.04787	0.592533	3.82193	3.82193	2.26655	3.02804	3.20231	2.77216	3.01544	3.22518	2.23415	1.19387
22052083	Island9449	chr7:47092859-47092860	-0.0483461	0.379032	0.371293	-0.650826	-1.51422	-0.666144	0.564569	0.049476	0.196934	0.581112	0.885072	1.06786	0.891969	1.61622	1.36857	1.43768	1.12489	0.928722	0.885072	0.976465	1.12093
22052085	Island9449	chr7:47092868-47092869	-0.0674186	0.403138	0.266673	0.727019	2.06702	-1.68518	-0.111456	-1.74339	2.15323	-0.670897	1.41856	2.1325	2.21307	1.05032	1.91916	2.3329	1.75984	2.7337	2.27874	2.37554	0.913827
22052087	Island9449	chr7:47092883-47092884	-0.0512743	0.518166	0.375518	-0.461439	2.08409	-1.35375	0.0110782	-1.55569	0.704225	0.726342	0.057063	1.6145	1.62318	1.20578	1.17071	1.66596	1.10575	2.21531	1.98909	2.44827	0.248028
22052089	Island9449	chr7:47092904-47092905	-0.0158833	0.93693	0.422455	0.0701435	1.11528	-1.88326	-0.24784	-1.23247	1.58161	0.860919	0.787628	1.8588	1.51902	0.594817	0.750043	0.127315	1.29952	1.36506	0.514137	0.730244	0.103267
22052091	Island9449	chr7:47092909-47092910	-0.0130731	0.445161	-0.625469	-0.0138974	0.810353	-2.97652	-0.536063	1.28303	1.14735	2.1958	0.834659	-0.575089	2.1958	0.6441	1.5383	0.579446	1.5092	2.1958	1.66439	-1.20705	-1.99798
22052093	Island9449	chr7:47092928-47092929	-0.0275859	0.80835	0.654548	-1.14019	1.09277	-2.81051	-0.465309	0.57288	0.202319	-0.385112	0.290931	0.513298	0.395474	0.185599	0.513298	1.60043	1.50853	1.14495	1.57286	0.974299	0.166874
22052095	Island9449	chr7:47092955-47092956	-0.0089142	0.922956	0.8123	-1.57833	-0.100041	-2.39322	0.156207	-1.48633	-0.818545	-0.28465	-0.655102	1.29248	0.60495	1.27308	0.9553	0.662736	0.966934	0.236598	0.389775	0.999584	0.594036
22052097	Island9449	chr7:47092991-47092992	0.000873565	0.975525	-0.335878	-1.02543	-1.95654	-2.28827	0.418632	0.909067	0.267207	0.292356	-0.301637	-0.782569	0.240953	0.721145	1.46178	-1.22168	0.690285	1.46178	0.740382	-1.43133	1.46178
22052099	Island9449	chr7:47093015-47093016	-0.00854104	0.588421	0.708657	-4.5174	1.03999	-3.00621	-3.02538	0.690135	-0.458229	1.49563	-1.97418	1.18051	0.223655	0.886931	0.108302	2.2645	1.08373	1.05493	2.2645	-0.0156173	1.2921
22052101	Island9449	chr7:47093024-47093025	-0.00644313	0.449276	-0.186547	-3.09134	0.0786887	-1.28291	1.08197	1.08197	0.42506	1.08197	-0.297542	-0.61589	0.417145	1.08197	-2.51676	1.08197	1.08197	0.42506	1.08197	1.08197	-0.494615
22052103	Island9449	chr7:47093042-47093043	0.0035869	0.857099	-1.23077	-0.804736	-3.78699	0.984618	0	-2.06608	-0.566155	0.984618	-0.787694	0.984618	0.146362	-0.393847	-0.492309	0.984618	0.984618	0.984618	-0.0158809	-1.44797	-0.895107
22052105	Island9449	chr7:47093045-47093046	0.001475	0.983055	-0.408237	-0.753562	0.868812	-0.0294513	0	0.868812	-2.52847	0.122368	-3.42829	0.868812	0.152629	0.868812	0.868812	-1.1311	0.171476	0.171476	0.868812	-0.150371	-2.24869
22052107	Island9449	chr7:47093055-47093056	-0.0114667	0.830662	0.437798	0.584218	-0.853144	0.687255	0.771893	0.0250925	0	-1.54319	0.365633	0.247687	-0.404121	1.27972	-2.62186	-0.404121	1.27972	0.794975	0.407183	-0.806778	0.365633
22052109	Island9449	chr7:47093069-47093070	0.00137706	0.980439	0.418239	-0.639136	-2.18856	-2.25592	0.910285	-2.17543	-0.390122	-0.796499	0.910285	0.910285	-0.472426	-0.0738069	-0.0738069	-0.324	0.0222021	0.303428	0.277043	-0.46373	-0.160639
22052111	Island9449	chr7:47093075-47093076	-0.000221701	0.596368	-0.717526	1.32952	-1.68943	1.76622	1.76622	-0.839678	-2.54293	-0.0965901	-2.90907	-0.618177	-0.325356	0.662332	1.76622	0.395877	0.257108	-0.362706	0.321131	0.987005	-1.07235
22633755	Island9691	chr7:75779629-75779630	-0.235307	0.082226	0.820131	-1.11666	0.525057	0.856097	0.70538	3.2299	1.55667	2.63821	-1.05702	1.38768	1.57318	2.70758	2.44643	1.56372	2.82597	1.52585	2.42563	2.66889	2.41844
22633757	Island9691	chr7:75779637-75779638	-0.252682	0.0026883	1.66442	-0.605574	0.777379	1.54371	0.548497	3.30176	2.03141	2.87012	-0.876294	1.85974	1.90847	2.93881	1.67221	1.79808	2.85859	1.79428	2.96952	2.67264	3.17304
22633759	Island9691	chr7:75779640-75779641	-0.217432	0.0734223	1.49584	-0.724733	0.43856	1.34476	0.950112	3.27856	2.43342	2.77814	0.0418539	1.42981	1.47535	2.1815	2.1815	2.48624	2.6447	1.85238	2.81701	2.25986	3.27856
22633761	Island9691	chr7:75779644-75779645	-0.243558	0.076637	1.84529	-0.235334	1.59246	1.46594	-0.0223432	3.83185	2.38283	3.23468	-1.30009	1.89983	1.91593	3.20023	2.25279	1.56069	2.55971	1.39071	2.60018	3.20023	3.44085
22633763	Island9691	chr7:75779653-75779654	-0.266159	0.00353868	1.88926	-0.118912	0.654776	1.62975	0.091649	2.62606	2.03373	3.429	-0.848959	1.7818	2.01206	2.62606	1.61162	2.01206	2.44547	1.03687	3.07024	3.3083	3.11727
22633765	Island9691	chr7:75779675-75779676	-0.257482	0.00524203	1.27518	0.251321	0.270586	1.74434	0.393405	3.00463	2.44933	3.55299	0.528287	2.5051	2.0112	3.34582	1.68091	2.35328	3.1202	1.95777	2.51099	3.43387	2.14095
22633767	Island9691	chr7:75779678-75779679	-0.285531	0.00166668	1.42486	1.18225	0.117331	2.13538	0.467401	4.01186	2.75247	3.60104	0.853192	2.42747	2.45848	3.70805	2.15524	2.0525	3.74663	1.42053	2.87599	3.68011	2.81261
22633769	Island9691	chr7:75779681-75779682	-0.306065	0.0041639	1.57618	0.836879	0.567586	1.87388	0.339083	3.64319	3.02568	3.27185	0.12079	2.30133	2.16465	3.60053	1.01841	1.95601	3.33798	2.00773	3.03327	3.55177	3.20532
22633771	Island9691	chr7:75779689-75779690	-0.278116	0.0018211	1.04357	-0.438387	0.30963	1.2322	1.21692	3.22015	3.11627	2.89813	0.365926	1.87842	1.34173	3.01889	1.34173	2.01259	3.34295	1.18388	2.36776	3.38116	2.75407
22633773	Island9691	chr7:75779721-75779722	-0.308529	0.00304235	1.4852	0.915383	0.920969	2.34651	0.2607	3.64338	3.01991	3.92678	0.419431	2.98654	2.57108	4.97317	2.33781	2.76412	4.15143	1.60897	3.12953	4.14142	3.96781
22633775	Island9691	chr7:75779724-75779725	-0.287563	0.0051961	1.19056	-0.212456	-0.700301	1.99863	0.303363	3.77519	3.04061	3.16062	0	2.04001	2.21228	4.15036	2.95036	1.96464	3.57649	1.46136	3.31292	4.54267	3.337
22633779	Island9691	chr7:75779766-75779767	-0.199323	0.431222	3.27332	-0.206825	-0.0832891	-0.714912	-0.221672	0.380057	1.00228	1.33374	0.395951	-0.245798	2.5992	4.79652	1.78078	2.78171	4.40211	1.97564	3.38113	2.01721	6.34057
22633781	Island9691	chr7:75779779-75779780	-0.304747	0.117966	2.13535	0.0492772	0.083557	2.15714	1.02224	4.22798	3.63009	4.44005	-0.549089	3.50448	1.92181	4.22798	1.49474	2.49835	4.1074	1.92181	3.72351	4.40886	5.76543
22633783	Island9691	chr7:75779788-75779789	-0.284588	0.0135222	1.69321	0.459124	0.386082	1.27566	0.704031	3.20279	2.78744	3.86814	-0.726742	2.52757	1.84865	3.08865	1.70464	1.97153	3.89911	1.49891	3.46622	3.52374	4.29686
22633805	Island9691	chr7:75779857-75779858	-0.268658	0.198892	0.933558	-0.273998	0.125506	0.825864	0.939083	3.11791	2.37984	4.3491	-1.26903	4.19339	2.11827	4.25927	1.23493	3.05153	4.70422	3.57055	3.85083	3.86714	5.90618
22633807	Island9691	chr7:75779862-75779863	-0.253448	0.218053	0.823833	0.175074	-0.995079	0.745163	0.608053	3.43463	1.51137	4.08151	-0.995079	3.24056	1.97398	4.32526	0.278989	2.45904	4.36878	2.80181	3.72775	4.4222	5.54401
22633809	Island9691	chr7:75779879-75779880	-0.245336	0.0761958	0.900635	-0.601049	-1.40408	1.0661	1.0308	4.89855	2.73477	4.7009	-2.06453	3.36588	2.35611	4.99453	0.525918	3.09732	4.72601	2.31404	3.69372	6.0706	4.62808
22633811	Island9691	chr7:75779908-75779909	-0.278293	0.0098883	1.41611	0.172459	-0.168464	0.756952	0.850837	4.11438	2.75378	4.34546	-0.470697	3.45316	2.69529	4.60712	0.0542015	2.25216	4.75722	3.02277	3.93475	4.65049	4.90277
22633813	Island9691	chr7:75779916-75779917	-0.255311	0.0253924	1.12253	0.0886207	-0.180267	0.360022	1.31181	2.06382	2.87705	4.06917	-1.18036	3.63945	2.6217	4.59438	0.058465	1.84309	4.52416	3.3002	3.98428	4.71374	5.07184
22633815	Island9691	chr7:75779923-75779924	-0.256717	0.0224271	1.24893	-0.110373	-0.954859	0.831386	1.6369	3.02606	2.9013	4.35948	-0.305024	3.03399	2.99479	4.05815	-0.119357	1.55165	3.86027	3.01942	3.91722	4.63937	4.96961
22633817	Island9691	chr7:75779938-75779939	-0.233827	0.0220042	0.92815	-0.822076	-1.25236	0.52905	1.84295	3.87845	2.63749	3.56576	-0.211091	2.62772	2.7869	3.54886	-0.617398	1.44364	3.72622	2.98383	3.20741	2.58082	3.16375
22633819	Island9691	chr7:75779951-75779952	-0.233079	0.0424678	0.723997	-0.659928	-1.26762	0.581042	1.7304	3.69647	2.39578	3.9618	0.336514	2.21661	2.41788	3.84582	-0.830179	1.35613	4.31693	2.96082	3.10861	3.22195	1.69291
22633821	Island9691	chr7:75779970-75779971	-0.213993	0.0561286	0.654074	-0.27815	-1.06624	0.180638	1.43415	2.31792	2.58516	2.98893	0.7116	2.98496	1.43415	3.5107	-0.343052	0.848085	3.80981	3.21933	2.72099	3.21933	0.406923
22633823	Island9691	chr7:75779973-75779974	-0.21604	0.0559947	0.543934	-0.433379	-0.580011	0.230686	2.03004	3.11604	2.50105	3.63371	0.543934	1.98515	2.10225	3.50643	-0.66899	0.898674	4.05768	1.93234	3.01622	3.9678	0.955313
22633825	Island9691	chr7:75779983-75779984	-0.250055	0.0201546	0.805743	0.130689	-0.516221	0.884951	2.4582	3.39873	2.97325	3.78729	0.49164	1.68562	2.2502	3.59214	-0.24582	1.46407	4.22169	2.90887	3.36902	4.26088	1.55686
22633827	Island9691	chr7:75779986-75779987	-0.245576	0.031684	0.484936	-0.327343	-1.0127	-0.215878	2.57557	3.42573	3.11494	3.92758	0.147348	2.60844	2.68208	3.67786	-0.796417	1.04196	4.26706	3.33143	3.59096	3.92758	1.04196
22633829	Island9691	chr7:75780018-75780019	-0.214826	0.0461635	0.766437	0.127739	-0.788979	0.214602	2.34721	3.47151	2.14602	3.79053	1.03174	1.73066	3.26569	2.40016	0.268253	0.508755	3.4629	1.70706	3.12962	3.90186	0.894176
22633831	Island9691	chr7:75780021-75780022	-0.217372	0.074216	1.21782	-1.44063	-1.3444	0.328889	2.62292	6.16184	3.39767	4.77607	1.83131	3.2562	4.06219	3.46729	-0.0303114	0.31432	4.66281	1.83131	3.36962	4.06219	0.740665
22852601	Open Sea	chr7:91808936-91808937	-0.215496	0.0376194	1.2695	0.903599	2.08512	1.23087	1.81566	-1.14591	0.272172	0.0815062	-0.575559	3.98784	3.14457	5.31423	5.84725	4.01216	5.84725	6.26038	6.69862	5.4309	2.09048
22861927	Open Sea	chr7:92347886-92347887	-0.200298	0.0029753	1.60677	1.63008	2.72723	0.921886	0.289182	2.96269	0.649651	3.48622	-0.257798	-0.273663	0.975883	3.38575	2.73873	1.4898	1.64223	1.37772	1.64223	2.4608	1.91564
22861931	Open Sea	chr7:92347940-92347941	-0.226954	0.00453933	1.61016	2.33035	2.88703	0.561116	-0.205742	2.26317	0.440877	2.27399	-0.974569	1.08432	1.29057	2.20438	1.99691	0.991972	0.933018	1.71452	0.835072	1.40279	1.89916
22861935	Open Sea	chr7:92347969-92347970	-0.201331	0.0174737	1.34804	2.58534	3.21804	-0.37811	0.67505	2.66321	-0.255924	2.75568	-1.00353	-2.46241	1.25582	1.67684	3.08594	1.45266	0.879033	1.98508	0.930566	1.5007	3.36405
23872013	Open Sea	chr7:149120620-149120621	-0.255679	0.0248445	-0.313374	1.94845	3.17583	0.98265	0.630534	0.967927	-0.224606	1.08763	1.81623	2.84384	2.14096	2.69822	0.741199	1.44425	2.69079	2.81978	1.73718	3.04769	0.741199
23872019	Open Sea	chr7:149120669-149120670	-0.245449	0.0352251	-0.809838	1.88271	2.327	1.50775	1.78485	0.368495	0.613055	0.643988	1.2415	3.13048	3.23158	3.45884	1.35415	1.91737	2.92889	3.5266	2.67939	2.39167	2.36796
23872021	Open Sea	chr7:149120671-149120672	-0.242209	0.0472337	-0.354833	2.13343	2.59841	2.08984	1.11893	0.418823	1.06888	0.583503	1.93415	3.85028	3.32909	2.35368	2.59841	1.54164	4.03292	3.92692	2.46165	2.21093	2.13343
23939131	Open Sea	chr7:151217961-151217962	-0.269988	0.00139426	1.38341	2.56532	0.980965	0.719374	1.50415	3.17371	1.59513	0.795098	1.8261	4.657	1.58262	4.00794	5.03562	2.52809	2.29736	4.22242	3.37553	1.07906	1.39643
24286079	Open Sea	chr8:2263411-2263412	-0.200501	0.0202015	0.332435	1.33404	1.72021	1.83431	1.19622	2.16837	2.66808	1.65757	0.987233	-0.229787	2.19886	1.80075	2.63297	0.94436	1.7536	1.61489	1.95086	1.00304	0.16851
24286083	Open Sea	chr8:2263440-2263441	-0.238048	0.0472713	-0.28458	1.07742	1.0955	3.12792	1.71551	2.26908	3.19552	2.22726	0.384017	-0.786662	2.89935	2.83983	3.70346	1.06387	2.70831	0.944738	2.32084	0.487852	0.642339
25280497	Open Sea	chr8:54605566-54605567	-0.205635	0.0495611	2.22821	1.71013	2.26275	4.10779	-0.200008	1.9075	1.4905	1.51755	-0.384473	2.19004	2.3088	2.92018	-0.00633634	0.836397	2.08079	2.24433	0.288149	2.28401	2.41626
25280897	Open Sea	chr8:54625185-54625186	-0.212692	0.0461346	-0.550389	1.32093	0.117941	1.12044	1.22414	1.88233	-0.664494	0.725513	2.72443	1.78877	2.32343	2.06396	1.49637	1.57611	1.15081	0.938164	1.25714	3.25074	2.2566
25861585	Open Sea	chr8:95132310-95132311	-0.278676	0.0309549	0.934227	1.71338	0.292592	1.25583	0.0816966	1.3758	0.199764	1.90722	0.954365	1.3137	1.91731	1.95023	1.41979	2.88514	1.97472	1.27551	2.03298	1.97472	2.80711
25861593	Open Sea	chr8:95132420-95132421	-0.249209	0.0368466	1.84757	1.45964	-0.673987	0.622142	0.466606	1.04633	0.427722	2.28601	1.73311	1.56888	2.11989	2.54782	0.382856	3.37734	2.69595	2.0361	2.35031	2.77571	2.69595
25916061	Open Sea	chr8:98290510-98290511	-0.217295	0.0477778	0.611039	1.08055	2.20039	1.15738	0.797944	1.31218	-0.7369	-0.709284	0.716104	3.38176	3.34895	1.89411	3.67054	3.67054	2.65981	2.29884	3.20128	4.74073	6.36582
26906979	Open Sea	chr9:5304509-5304510	-0.207791	0.0341961	-0.871515	-1.32075	-1.38217	1.62355	0.217879	3.0503	0.373507	2.09956	0.963254	5.66485	4.98766	7.98271	4.09885	4.02514	4.99445	5.66485	5.36433	8.47306	6.10061
26906981	Open Sea	chr9:5304511-5304512	-0.201633	0.0471026	-0.55426	-0.790469	-1.30214	0.80893	-1.01723	1.37478	-0.617249	0.526004	0.257968	5.44546	5.61868	9.86257	4.02722	4.99326	5.43416	6.67965	5.38928	9.47676	7.31623
28794575	Open Sea	chr9:130764168-130764169	-0.200422	0.0235278	3.00623	3.23609	4.03489	2.01672	2.14237	2.33983	0.4335	4.53414	-1.28542	-0.19074	1.34466	0.590083	0.207326	0.665627	0.562743	2.76842	0.819736	2.10985	-0.0853697
29858673	Open Sea	chr10:26461256-26461257	0.225521	0.0346694	-4.79076	-2.35175	-5.92805	-2.13488	-4.2643	-0.107684	-2.67591	0.645482	-0.103787	-2.93312	0.645482	-2.18541	-3.79049	-0.558855	-2.72569	-2.48579	-1.41323	-1.25135	-1.78995
30093949	Open Sea	chr10:38334341-38334342	0.26131	0.0438287	-1.95338	0.268669	-1.95338	-1.95338	1.70188	-1.95338	1.71635	-1.95338	-1.95338	-1.95338	0.210475	-1.95338	0.441495	0.232612	-0.264204	0.0233148	0.119861	-0.827261	-0.287503
30276757	Open Sea	chr10:50649838-50649839	-0.223676	0.0357551	3.34954	2.68826	1.86347	-0.277309	0.235855	0.223637	-1.62647	2.25092	-1.1463	0.734806	1.74503	5.45226	5.41462	2.63213	3.74457	3.02035	1.95104	4.40296	3.08618
30276759	Open Sea	chr10:50649875-50649876	-0.228296	0.0413253	2.49942	1.73815	0.121114	1.51576	-0.0768358	0.188597	-0.806776	1.38304	-1.19321	0.0809891	1.17449	3.88569	5.21523	2.33514	3.24289	3.05148	1.64963	4.51136	3.32955
30299025	Open Sea	chr10:51784536-51784537	-0.279478	0.00272603	3.51353	3.21237	0.140541	0.702705	2.81082	1.48496	2.6937	2.17982	-0.234235	2.05406	2.69609	4.45854	2.93859	3.01524	4.17608	3.62448	3.67569	2.92325	4.01546
30299027	Open Sea	chr10:51784543-51784544	-0.251794	0.00472009	3.68287	3.65595	1.69944	1.27788	2.37561	2.4394	2.52967	3.03675	1.68578	1.74452	3.18878	4.13895	2.503	0.708501	4.81117	4.24397	3.57518	3.6223	3.92516
30299029	Open Sea	chr10:51784558-51784559	-0.269347	0.000458505	3.38205	4.53004	1.71443	2.34909	1.55729	3.45622	3.31991	1.79835	1.71443	2.02214	5.93455	3.41103	2.76946	3.13466	2.89606	2.97148	4.04237	2.94529	6.11715
30299031	Island13042	chr10:51784595-51784596	-0.257457	0.00211029	2.80323	4.82374	-0.25114	-0.37412	1.6021	1.2904	4.68268	3.1574	1.65425	2.60808	2.69811	7.5371	2.09023	4.90409	3.45437	4.10581	5.54551	4.51188	5.33052
30299033	Island13042	chr10:51784605-51784606	-0.232608	0.00195604	2.23649	4.32165	0	1.5416	3.03015	1.55713	1.90493	3.00521	2.67613	2.42831	2.22158	5.62929	2.11643	3.6328	3.41416	3.74198	3.8963	6.25522	3.4098
30299035	Island13042	chr10:51784621-51784622	-0.210835	0.0108177	3.94696	4.10946	0.411692	-0.894234	3.43982	1.24112	3.04007	1.92885	1.02033	4.23942	2.48605	4.14734	0.733584	4.21751	3.94331	2.16078	3.21898	6.02125	4.61322
30299037	Island13042	chr10:51784624-51784625	-0.215111	0.00372579	3.98752	3.46768	-0.473183	0.253052	1.91614	0.683132	3.18949	3.42984	1.77718	4.15291	4.49847	5.78007	1.82153	3.66636	6.20223	2.85938	3.55598	5.67337	3.24063
30299039	Island13042	chr10:51784633-51784634	-0.203737	0.00830338	2.00475	2.78813	-0.810012	0.610712	2.13366	1.93703	2.48052	2.9472	1.78015	3.41277	4.11475	2.89458	1.9702	3.3691	4.6725	2.7476	4.30203	5.6493	2.93357
30299041	Island13042	chr10:51784644-51784645	-0.204741	0.0017942	4.54526	3.32257	-0.198787	2.05683	1.59686	2.38264	4.80587	3.20676	2.64329	1.25446	2.99667	6.73692	3.25792	3.60369	6.68679	5.94151	4.03282	6.89609	0.691298
30299043	Island13042	chr10:51784648-51784649	-0.195252	0.00993003	3.94753	4.817	-0.846158	-0.601174	0.939249	2.35386	2.98218	4.27754	1.1579	2.76675	2.34929	4.79646	3.39452	3.35392	5.05749	1.63396	2.96181	6.01064	5.20199
30299045	Island13042	chr10:51784720-51784721	-0.253413	0.000439009	5.02697	5.33476	2.07786	-0.311296	1.87523	4.26618	3.4975	2.98966	2.98966	4.2621	4.67947	4.78746	2.34257	3.52523	6.76087	6.33293	5.19622	7.20674	5.49711
30299047	Island13042	chr10:51784725-51784726	-0.195273	0.00121129	4.04476	4.43071	3.75268	0.560074	1.69774	2.45496	1.76556	2.45655	0.90249	3.25065	3.75268	3.36712	1.26471	3.77327	6.57728	2.22035	5.72616	5.42289	3.73594
30299049	Island13042	chr10:51784731-51784732	-0.21802	0.00356606	3.98173	4.46307	4.31401	0.263309	0.458412	3.25488	2.94597	2.40271	0.101845	5.09789	3.31042	5.02676	1.9622	3.79857	6.70321	0.74307	5.85184	7.27793	3.54562
30299051	Island13042	chr10:51784733-51784734	-0.174834	0.00523697	3.53808	2.81926	4.66337	0.663428	2.55426	2.8694	1.958	2.05167	0.292598	4.04821	2.09271	2.89061	-0.0178263	2.04634	5.95323	2.26276	3.71533	6.72343	1.33252
30299053	Island13042	chr10:51784739-51784740	-0.215265	0.00376626	4.32727	5.27365	1.85284	-0.0465856	1.85284	2.31773	2.8756	3.17745	1.17182	3.74218	4.11014	3.2692	1.25313	2.71895	5.9926	5.24466	4.16203	7.12901	2.49744
30299055	Island13042	chr10:51784741-51784742	-0.194199	0.0907663	4.04706	3.53555	1.0377	1.19965	1.72898	3.56436	1.60928	2.29201	2.37735	3.48389	1.85367	3.14542	1.56273	3.11273	5.1936	4.2264	5.02901	8.35121	3.19197
30299057	Island13042	chr10:51784749-51784750	-0.215611	0.00389916	3.2632	4.59246	-0.0728359	-0.068117	1.18669	2.89079	1.58174	2.32198	1.00096	3.28036	3.58601	4.99751	1.86012	2.75901	6.97027	4.28574	4.45127	6.97669	4.07056
30299059	Island13042	chr10:51784758-51784759	-0.256996	0.000757971	3.10196	4.36082	4.47934	1.41067	2.36921	1.86707	4.1367	1.73753	1.23434	2.35923	4.27904	3.1138	2.31753	3.7087	4.92529	4.78061	4.39212	4.89923	1.38635
30299061	Island13042	chr10:51784767-51784768	-0.215774	0.00523697	2.63712	3.14562	1.64543	-0.0294834	1.14382	2.76306	4.197	1.21578	1.82114	1.66932	3.13507	3.50557	2.93388	3.06955	0.355579	5.32391	4.07306	6.3968	4.51096
30299063	Island13042	chr10:51784798-51784799	-0.175449	0.115672	3.09348	3.7215	0.743878	-1.18636	0.743878	1.63323	2.24281	0.0972968	2.1162	3.53274	2.57754	2.56688	0.881752	2.36863	4.67328	2.68724	2.66357	-0.0661314	3.86902
30299065	Island13042	chr10:51784800-51784801	-0.213582	0.0307281	2.46033	3.33919	0.481149	-0.620894	2.23966	0.676279	0.301223	0.502864	1.91637	2.77969	3.27113	2.49631	-0.14859	3.62984	5.2968	3.76808	4.10215	6.46367	5.35478
30299067	Island13042	chr10:51784805-51784806	-0.258696	0.0014842	4.42673	6.28188	0.882331	0.621714	2.54507	0.889777	2.68183	0.823917	2.44603	2.57634	6.82641	3.2447	3.95308	5.49325	8.8948	4.74074	5.73218	8.76376	3.30721
30299069	Island13042	chr10:51784809-51784810	-0.256518	0.00472009	1.43324	5.83695	1.48919	0.892439	2.49621	0.413229	3.36749	-0.170863	3.03201	2.45452	3.63003	4.16495	2.03405	3.55917	4.55621	3.30855	3.71195	5.35702	2.59744
30299071	Open Sea	chr10:51784830-51784831	-0.223502	0.0168706	3.5323	3.91219	1.31657	0.590241	0.776333	0.215789	1.85846	1.54432	1.82131	2.04252	4.82658	1.08039	1.60759	3.2636	6.369	1.461	3.94043	6.78254	3.82181
30299073	Open Sea	chr10:51784846-51784847	-0.208642	0.0426806	1.9749	5.36045	0.266122	0.188086	0.412342	-0.54979	0.198535	0.595606	1.42945	1.3257	4.20962	2.58096	3.2386	3.79699	5.55627	2.44512	3.76283	4.54826	2.90358
30792171	Open Sea	chr10:80999870-80999871	-0.220688	0.000971349	2.98878	2.77675	2.45367	2.16223	2.71701	2.11345	2.43535	2.28513	2.82878	2.24758	-0.789916	2.74462	2.28513	-1.26446	2.23051	0.60457	1.10896	1.39813	1.93462
30792173	Open Sea	chr10:80999872-80999873	-0.203842	0.00215731	2.96327	2.88608	2.77876	1.92954	2.18384	2.00606	2.32384	2.52234	2.43274	1.63939	0.52211	1.8105	2.52234	0.336285	1.27271	0.0993568	2.15273	1.22382	1.12604
30792179	Open Sea	chr10:80999913-80999914	-0.245375	0.0320512	2.39891	2.2544	1.9984	1.48366	2.54342	1.56518	2.16939	0.860276	2.32416	1.79536	-0.554336	1.96537	2.2255	-1.54422	1.76482	0.350817	1.21018	1.38732	2.16939
31121983	Open Sea	chr10:99735010-99735011	-0.228879	0.0497419	0.485944	1.26872	2.26668	0.922917	0.930942	0.676806	1.58605	1.71095	1.84583	0.22718	1.62198	4.85191	1.57606	1.94604	1.69335	3.38895	2.88848	3.59938	1.84583
31121987	Open Sea	chr10:99735030-99735031	-0.243731	0.0232858	0.896568	3.36391	1.55383	0.192408	0.574185	1.47896	1.33144	1.87749	2.14831	1.48599	1.24559	3.16388	2.35143	2.67247	2.50513	1.99598	3.33574	2.26779	2.23294
32859873	Open Sea	chr11:47383126-47383127	-0.208194	0.0200958	2.21274	4.2123	3.70984	0.0686881	2.35257	1.36145	0.0686881	3.71335	-0.640591	-0.521702	0.211928	3.63254	1.70003	0.503713	1.83295	0.755569	0.833731	2.89635	-0.3508
33737115	Island14884	chr11:89786603-89786604	-0.11766	0.430087	1.43191	0.928821	1.50118	-0.608498	2.25479	1.30848	0.160161	-2.8231	-1.22343	0.362011	1.0936	-0.0268099	1.22446	1.11308	2.56074	2.24782	2.26855	2.13224	-0.121565
33737117	Island14884	chr11:89786605-89786606	-0.105579	0.289757	0.582323	1.35701	1.68517	0.317818	0.812393	0.306879	-0.275815	0.140866	-0.218186	1.62859	1.10294	1.19736	1.23768	2.41019	2.77906	2.00072	2.45366	0.641011	1.25338
33737119	Island14884	chr11:89786630-89786631	-0.194477	0.0272505	0.801377	1.66744	4.11933	0.538672	5.53275	1.17602	-0.324501	-0.19332	-0.762055	4.82553	2.94591	5.41996	5.50775	3.89402	3.89954	5.01895	5.41996	2.55274	0.519202
33737121	Island14884	chr11:89786638-89786639	-0.200535	0.0197172	1.22833	2.84624	1.9039	1.00804	1.39496	0.507044	0.642107	1.50567	-0.510895	4.35259	2.25082	4.72776	5.36087	2.96185	4.71512	3.26675	3.99969	4.56486	1.66383
33737123	Island14884	chr11:89786642-89786643	-0.131817	0.0436911	-0.223594	0.993437	1.40475	-1.56533	1.35471	0.584962	0.264726	0.269323	0.610492	2.90816	2.24865	3.50295	3.37173	2.71009	2.78329	3.09254	3.15906	1.72005	1.61572
33737125	Island14884	chr11:89786653-89786654	-0.214496	0.0204907	-0.637377	1.33832	2.13315	1.03408	3.74768	0.741705	1.66902	1.1399	0.61079	4.38609	2.38757	3.78548	2.83049	5.03611	3.39674	3.36974	3.54296	1.79207	2.25692
33737127	Island14884	chr11:89786655-89786656	-0.180956	0.110783	0.738831	0.68944	0.277854	1.09047	2.13224	0.577489	-0.339161	-0.397501	0.213829	5.57219	2.17517	3.52804	1.54554	2.47667	3.44502	3.00675	3.26652	2.67004	1.66505
[truncated: 204 more rows]
